# Supplementary material for: T-cell infiltration in the central nervous system and their association with brain calcification in Slc20a2-deficient mice
Source: Front Mol Neurosci. 2023 Jan 20;16:1073723. doi: 10.3389/fnmol.2023.1073723 (PMC9894888; doi:10.3389/fnmol.2023.1073723)
Supplement: Supplementary file 3 [file Table_3.XLSX]

## Sheet: RNAseq Protein-coding Genes
Gene_ID	F1918	F1624	F1622	F3908	F3612	F3609	P1623	P3904	P3612	P3907	FTY720	Placebo	Log2FoldChange	P-value	P-adj	Gene_Name	Gene_Chr	Gene_Start	Gene_End	Gene_Biotype	Gene_Description
ENSMUSG00000039830	490.339	461.858	381.524	433.216	417.888	328.051	643.792	579.056	565.15	660.826	418.813	612.206	-0.547287	5.40219e-05	0.624124	Olig2	16	91225457	91228677	protein_coding	oligodendrocyte transcription factor 2 [Source:MGI Symbol;Acc:MGI:1355331]
ENSMUSG00000047797	246.655	201.273	203.013	273.455	243.607	224.3	278.05	331.296	422.888	417.55	232.051	362.446	-0.643708	7.48891e-05	0.624124	Gjb1	X	101376378	101385629	protein_coding	gap junction protein, beta 1 [Source:MGI Symbol;Acc:MGI:95719]
ENSMUSG00000022146	133.729	105.984	151.676	98.9927	92.436	124.501	66.3042	73.094	75.0285	62.8094	117.887	69.309	0.763644	7.55239e-05	0.624124	Osmr	15	6813577	6874969	protein_coding	oncostatin M receptor [Source:MGI Symbol;Acc:MGI:1330819]
ENSMUSG00000026121	249.627	264.474	218.18	265.614	292.714	219.36	336.868	348.383	345.911	406.05	251.662	359.303	-0.513271	9.61498e-05	0.624124	Sema4c	1	36548639	36558349	protein_coding	sema domain, immunoglobulin domain (Ig), transmembrane domain (TM) and short cytoplasmic domain, (semaphorin) 4C [Source:MGI Symbol;Acc:MGI:109252]
ENSMUSG00000030775	18.8211	19.4466	21.0013	24.5032	21.1833	21.7384	8.55538	10.442	7.79517	3.53856	21.1156	7.58278	1.48995	0.000112899	0.624124	Trat1	16	48730774	48772021	protein_coding	T cell receptor associated transmembrane adaptor 1 [Source:MGI Symbol;Acc:MGI:1924897]
ENSMUSG00000043448	452.697	292.672	378.023	289.137	404.408	295.444	479.101	464.194	672.333	654.634	352.063	567.566	-0.689582	0.000194503	0.921637	Gjc2	11	59175568	59183213	protein_coding	gap junction protein, gamma 2 [Source:MGI Symbol;Acc:MGI:2153060]
ENSMUSG00000026678	1191.67	1126.93	1068.73	1087.94	1487.64	1637.29	769.984	873.33	920.804	894.371	1266.7	864.622	0.550933	0.000318187	0.999941	Rgs5	1	169655501	169695813	protein_coding	regulator of G-protein signaling 5 [Source:MGI Symbol;Acc:MGI:1098434]
ENSMUSG00000002274	78.2561	57.3676	44.3361	58.8076	70.2899	63.2388	118.706	82.5867	87.6957	148.62	62.0493	109.402	-0.816217	0.000385064	0.999941	Metrn	17	25794571	25797136	protein_coding	meteorin, glial cell differentiation regulator [Source:MGI Symbol;Acc:MGI:1917333]
ENSMUSG00000048285	715.201	795.368	543.7	506.725	695.196	661.044	447.019	472.738	390.733	502.476	652.872	453.241	0.526616	0.000649518	0.999941	Frmd6	12	70825514	70902234	protein_coding	FERM domain containing 6 [Source:MGI Symbol;Acc:MGI:2442579]
ENSMUSG00000029802	348.685	324.759	316.186	346.965	361.078	406.112	265.217	221.18	283.549	270.7	350.631	260.162	0.431316	0.000684058	0.999941	Abcg2	6	58584523	58695676	protein_coding	ATP binding cassette subfamily G member 2 (Junior blood group) [Source:MGI Symbol;Acc:MGI:1347061]
ENSMUSG00000010529	79.2467	78.7589	71.1711	78.4101	73.1785	83.9891	103.734	101.572	126.672	117.657	77.4591	112.409	-0.537065	0.000717188	0.999941	Gm266	12	111484609	111485823	protein_coding	predicted gene 266 [Source:MGI Symbol;Acc:MGI:2685112]
ENSMUSG00000049630	549.774	760.364	796.883	484.182	583.502	545.435	445.949	447.107	350.783	419.319	620.023	415.79	0.575989	0.000722842	0.999941	C1ql3	2	13003457	13011806	protein_coding	C1q-like 3 [Source:MGI Symbol;Acc:MGI:2387350]
ENSMUSG00000035202	2895.48	3038.54	2507.32	6836.38	2312.83	2582.91	9135	4747.31	5142.86	8512.01	3362.24	6884.3	-1.03385	0.000748676	0.999941	Lars2	9	123366927	123462666	protein_coding	leucyl-tRNA synthetase, mitochondrial [Source:MGI Symbol;Acc:MGI:2142973]
ENSMUSG00000033542	55.4727	65.1462	70.0043	61.7479	85.6959	81.0248	26.7356	45.5651	44.8222	46.0013	69.8486	40.781	0.770256	0.000775372	0.999941	Arhgef5	6	43265582	43289320	protein_coding	Rho guanine nucleotide exchange factor (GEF) 5 [Source:MGI Symbol;Acc:MGI:1858952]
ENSMUSG00000027015	70.3314	77.7866	78.1715	87.2312	59.6983	73.1199	66.3042	40.8187	33.1295	34.501	74.3898	43.6883	0.775619	0.00103534	0.999941	Cybrd1	2	71117923	71142926	protein_coding	cytochrome b reductase 1 [Source:MGI Symbol;Acc:MGI:2654575]
ENSMUSG00000016087	82.2184	57.3676	53.67	70.5691	60.6611	71.1437	32.0827	39.8694	43.8478	45.1166	65.9383	40.2291	0.710375	0.00103644	0.999941	Fli1	9	32422204	32542861	protein_coding	Friend leukemia integration 1 [Source:MGI Symbol;Acc:MGI:95554]
ENSMUSG00000070720	72.3126	51.5336	57.1702	107.814	98.2133	66.2032	117.636	107.268	152.98	136.235	75.5411	128.53	-0.764896	0.00112674	0.999941	Tmem200b	4	131921771	131923140	protein_coding	transmembrane protein 200B [Source:MGI Symbol;Acc:MGI:3646343]
ENSMUSG00000024325	509.16	419.075	392.024	443.017	433.294	380.421	644.862	479.382	566.124	628.094	429.499	579.616	-0.431812	0.00116885	0.999941	Ring1	17	34020792	34024680	protein_coding	ring finger protein 1 [Source:MGI Symbol;Acc:MGI:1101770]
ENSMUSG00000049295	876.666	735.083	600.871	787.041	814.592	676.853	858.746	1056.54	1040.66	1096.95	748.518	1013.22	-0.436679	0.00125559	0.999941	Zfp219	14	52006077	52020733	protein_coding	zinc finger protein 219 [Source:MGI Symbol;Acc:MGI:1917140]
ENSMUSG00000045404	180.286	158.49	193.679	177.403	164.652	142.287	220.301	204.094	262.113	239.737	169.466	231.561	-0.452284	0.00133768	0.999941	Kcnk13	12	99964499	100062682	protein_coding	potassium channel, subfamily K, member 13 [Source:MGI Symbol;Acc:MGI:2384976]
ENSMUSG00000049717	190.192	247.945	212.346	218.568	227.239	238.134	167.899	166.123	161.75	174.274	222.404	167.511	0.409177	0.00142281	0.999941	Lig4	8	9969049	9977686	protein_coding	ligase IV, DNA, ATP-dependent [Source:MGI Symbol;Acc:MGI:1335098]
ENSMUSG00000079018	513.122	402.545	616.038	530.248	475.66	586.936	393.547	306.615	407.298	390.126	520.758	374.397	0.475572	0.00164171	0.999941	Ly6c1	15	75044018	75048830	protein_coding	lymphocyte antigen 6 complex, locus C1 [Source:MGI Symbol;Acc:MGI:96882]
ENSMUSG00000042207	1358.09	1395.3	1314.91	1157.53	1277.74	1304.3	1050.17	1166.66	987.063	1015.57	1301.31	1054.86	0.30288	0.00172411	0.999941	Kdm5b	1	134560171	134635285	protein_coding	lysine (K)-specific demethylase 5B [Source:MGI Symbol;Acc:MGI:1922855]
ENSMUSG00000025324	223.872	209.051	140.009	155.84	237.83	325.087	104.803	165.173	106.209	132.696	215.282	127.22	0.75879	0.00188923	0.999941	Atp10a	7	58656166	58829420	protein_coding	ATPase, class V, type 10A [Source:MGI Symbol;Acc:MGI:1330809]
ENSMUSG00000043410	55.4727	56.3953	61.8372	59.7877	47.1809	56.3221	45.9852	29.4274	33.1295	31.847	56.166	35.0973	0.683616	0.0018959	0.999941	Hfm1	5	106840192	106926321	protein_coding	HFM1, ATP-dependent DNA helicase homolog [Source:MGI Symbol;Acc:MGI:3036246]
ENSMUSG00000084845	799.401	648.545	631.206	675.307	628.757	553.34	1008.47	685.374	997.782	922.68	656.093	903.575	-0.461434	0.00194825	0.999941	Tmem240	4	155734800	155740564	protein_coding	transmembrane protein 240 [Source:MGI Symbol;Acc:MGI:3648074]
ENSMUSG00000058966	946.998	810.925	831.885	966.404	863.699	727.247	1034.13	1001.48	1228.71	1167.72	857.86	1108.01	-0.369244	0.00205733	0.999941	Fam57b	7	126797668	126830219	protein_coding	family with sequence similarity 57, member B [Source:MGI Symbol;Acc:MGI:1916202]
ENSMUSG00000017724	175.333	149.739	151.676	164.661	207.981	160.073	235.273	214.535	233.855	220.275	168.244	225.985	-0.423804	0.00210201	0.999941	Etv4	11	101769742	101785371	protein_coding	ets variant 4 [Source:MGI Symbol;Acc:MGI:99423]
ENSMUSG00000050141	40.6139	53.4783	38.5024	28.4237	10.5916	100.787	33.1521	6.6449	6.82077	7.07712	45.3995	13.4237	1.77096	0.00217112	0.999941	Fam205c	4	42868004	42874234	protein_coding	family with sequence similarity 205, member C [Source:MGI Symbol;Acc:MGI:2679716]
ENSMUSG00000036634	3201.57	2735.17	2217.97	2417.97	2591.1	2012.77	3448.89	2943.69	3754.35	3657.1	2529.42	3451.01	-0.448128	0.00221501	0.999941	Mag	7	30899176	30914873	protein_coding	myelin-associated glycoprotein [Source:MGI Symbol;Acc:MGI:96912]
ENSMUSG00000028919	394.252	303.368	319.686	336.183	352.412	300.385	458.782	414.832	411.195	432.589	334.381	429.35	-0.360001	0.00235921	0.999941	Arhgef19	4	141239499	141257564	protein_coding	Rho guanine nucleotide exchange factor (GEF) 19 [Source:MGI Symbol;Acc:MGI:1925912]
ENSMUSG00000075553	0	1.94466	0	2.94038	0.962875	1.97621	9.6248	7.59418	8.76957	3.53856	1.30402	7.38178	-2.46587	0.00244625	0.999941	Gm5464	14	66868850	66871723	protein_coding	predicted gene 5464 [Source:MGI Symbol;Acc:MGI:3643060]
ENSMUSG00000074217	9.90583	13.6126	12.8341	6.86088	7.703	8.89296	37.4298	8.54345	35.0783	20.3467	9.96824	25.3496	-1.34565	0.0024891	0.999941	2210011C24Rik	8	84010222	84012171	protein_coding	RIKEN cDNA 2210011C24 gene [Source:MGI Symbol;Acc:MGI:1917384]
ENSMUSG00000020717	336.798	265.447	261.35	345.004	385.15	337.933	221.37	253.456	251.394	219.391	321.947	236.403	0.446571	0.00271793	0.999941	Pecam1	11	106654217	106750628	protein_coding	platelet/endothelial cell adhesion molecule 1 [Source:MGI Symbol;Acc:MGI:97537]
ENSMUSG00000024066	170.38	112.791	112.007	123.496	163.689	130.43	102.665	96.8258	52.6174	91.1179	135.465	85.8064	0.660495	0.00275909	0.999941	Xdh	17	73883895	73950196	protein_coding	xanthine dehydrogenase [Source:MGI Symbol;Acc:MGI:98973]
ENSMUSG00000025608	531.943	460.885	500.531	456.739	588.317	559.269	360.395	440.462	334.218	430.82	516.281	391.474	0.398512	0.00289779	0.999941	Podxl	6	31519488	31563981	protein_coding	podocalyxin-like [Source:MGI Symbol;Acc:MGI:1351317]
ENSMUSG00000062168	14.8588	10.6957	26.835	6.86088	24.0719	14.8216	4.27769	5.69563	9.74396	1.76928	16.3573	5.37164	1.60794	0.00315754	0.999941	Ppef1	X	160623094	160735765	protein_coding	protein phosphatase with EF hand calcium-binding domain 1 [Source:MGI Symbol;Acc:MGI:1097157]
ENSMUSG00000026083	1209.5	1404.05	1589.1	1193.79	1345.14	1369.52	1120.75	1141.03	988.038	1040.34	1351.85	1072.54	0.333646	0.00318727	0.999941	Eif5b	1	37998010	38055579	protein_coding	eukaryotic translation initiation factor 5B [Source:MGI Symbol;Acc:MGI:2441772]
ENSMUSG00000037031	358.591	351.012	331.354	350.885	342.784	319.159	414.936	382.557	449.197	444.974	342.297	422.916	-0.305076	0.00326128	0.999941	Tspan15	10	62185396	62231251	protein_coding	tetraspanin 15 [Source:MGI Symbol;Acc:MGI:1917673]
ENSMUSG00000034533	6.93408	4.86166	5.83369	19.6025	94.3618	3.95243	5.34711	4.74636	1.94879	3.53856	22.591	3.89521	2.54248	0.00337109	0.999941	Scn10a	9	119608456	119719322	protein_coding	sodium channel, voltage-gated, type X, alpha [Source:MGI Symbol;Acc:MGI:108029]
ENSMUSG00000074796	48.5386	38.8933	37.3356	32.3442	39.4779	34.5837	33.1521	14.2391	20.4623	19.4621	38.5289	21.8289	0.830871	0.00359575	0.999941	Slc4a11	2	130684113	130697519	protein_coding	solute carrier family 4, sodium bicarbonate transporter-like, member 11 [Source:MGI Symbol;Acc:MGI:2138987]
ENSMUSG00000044033	362.554	375.32	289.351	347.945	439.071	553.34	235.273	346.484	226.06	245.93	394.597	263.437	0.58322	0.00361183	0.999941	Ccdc141	2	77009902	77170636	protein_coding	coiled-coil domain containing 141 [Source:MGI Symbol;Acc:MGI:1919735]
ENSMUSG00000028452	3511.62	3505.26	4599.28	3323.61	2049	4067.05	3098.12	1837.79	2096.9	2033.79	3509.3	2266.65	0.630682	0.00375915	0.999941	Vcp	4	42979963	43000507	protein_coding	valosin containing protein [Source:MGI Symbol;Acc:MGI:99919]
ENSMUSG00000057967	25.7552	18.4743	12.8341	26.4634	20.2204	19.7621	28.8744	34.1738	39.9502	42.4627	20.5849	36.3653	-0.817961	0.00386327	0.999941	Fgf18	11	33117430	33147400	protein_coding	fibroblast growth factor 18 [Source:MGI Symbol;Acc:MGI:1277980]
ENSMUSG00000015880	14.8588	15.5573	8.16717	4.90063	10.5916	7.90486	2.13884	4.74636	1.94879	3.53856	10.3301	3.09314	1.73033	0.00394038	0.999941	Ncapg	5	45669919	45700546	protein_coding	non-SMC condensin I complex, subunit G [Source:MGI Symbol;Acc:MGI:1930197]
ENSMUSG00000043496	1000.49	1057.9	929.891	1004.63	1086.12	938.702	1159.25	1144.82	1237.48	1263.27	1002.96	1201.21	-0.260047	0.00401837	0.999941	Tril	6	53815468	53820830	protein_coding	TLR4 interactor with leucine-rich repeats [Source:MGI Symbol;Acc:MGI:1914123]
ENSMUSG00000035206	722.135	661.186	550.701	671.386	663.421	511.839	826.663	767.012	793.159	832.446	630.111	804.82	-0.352519	0.00435137	0.999941	Sppl2b	10	80855275	80868708	protein_coding	signal peptide peptidase like 2B [Source:MGI Symbol;Acc:MGI:1920468]
ENSMUSG00000050138	279.345	219.747	161.01	246.992	228.201	221.336	317.618	371.165	238.727	370.664	226.105	324.544	-0.520595	0.00436119	0.999941	Kcnk12	17	87745837	87797994	protein_coding	potassium channel, subfamily K, member 12 [Source:MGI Symbol;Acc:MGI:2684043]
ENSMUSG00000001666	128.776	103.067	136.508	99.9729	111.694	96.8345	175.385	109.166	204.623	176.928	112.809	166.526	-0.563247	0.00470834	0.999941	Ddt	10	75771230	75773414	protein_coding	D-dopachrome tautomerase [Source:MGI Symbol;Acc:MGI:1298381]
ENSMUSG00000038695	923.224	708.83	885.555	746.856	770.3	635.353	1039.48	800.236	1259.89	1156.22	778.353	1063.96	-0.45127	0.00472236	0.999941	Josd2	7	44467980	44471662	protein_coding	Josephin domain containing 2 [Source:MGI Symbol;Acc:MGI:1913374]
ENSMUSG00000038319	1004.45	908.158	855.22	967.385	922.434	784.557	1138.93	1077.42	1064.04	1134.99	907.034	1103.85	-0.28304	0.00482425	0.999941	Kcnh2	5	24319589	24351604	protein_coding	potassium voltage-gated channel, subfamily H (eag-related), member 2 [Source:MGI Symbol;Acc:MGI:1341722]
ENSMUSG00000021091	786.523	657.296	1754.78	1051.68	572.911	654.127	668.389	345.535	540.79	475.052	912.885	507.441	0.84704	0.00485628	0.999941	Serpina3n	12	104406729	104414329	protein_coding	serine (or cysteine) peptidase inhibitor, clade A, member 3N [Source:MGI Symbol;Acc:MGI:105045]
ENSMUSG00000019214	27.7363	13.6126	17.5011	20.5826	20.2204	23.7146	28.8744	35.1231	35.0783	43.3474	20.5613	35.6058	-0.794609	0.00512442	0.999941	Chtf18	17	25718926	25727419	protein_coding	CTF18, chromosome transmission fidelity factor 18 [Source:MGI Symbol;Acc:MGI:2384887]
ENSMUSG00000019979	308.071	366.569	452.695	318.541	297.528	371.528	257.731	300.919	238.727	248.584	352.489	261.49	0.429409	0.0051663	0.999941	Apaf1	10	90989311	91082770	protein_coding	apoptotic peptidase activating factor 1 [Source:MGI Symbol;Acc:MGI:1306796]
ENSMUSG00000052144	1466.06	1488.64	1671.94	1618.19	1643.63	1684.72	1215.93	1320.44	1368.05	1430.46	1595.53	1333.72	0.258049	0.00527028	0.999941	Ppp4r2	6	100833622	100869934	protein_coding	protein phosphatase 4, regulatory subunit 2 [Source:MGI Symbol;Acc:MGI:3027896]
ENSMUSG00000069565	701.333	561.036	586.87	556.712	599.871	479.232	795.65	692.019	770.747	699.75	580.842	739.542	-0.348166	0.00528304	0.999941	Dazap1	10	80261486	80288408	protein_coding	DAZ associated protein 1 [Source:MGI Symbol;Acc:MGI:1917498]
ENSMUSG00000051906	5.9435	2.917	7.00043	2.94038	6.74013	5.92864	7.48596	13.2898	23.3855	11.5003	5.24501	13.9154	-1.4177	0.00531639	0.999941	Cd209f	8	4102787	4105835	protein_coding	CD209f antigen [Source:MGI Symbol;Acc:MGI:1916392]
ENSMUSG00000004100	242.693	205.162	255.516	252.873	238.793	197.621	377.506	257.253	333.244	278.662	232.11	311.666	-0.424388	0.00538279	0.999941	Ppan	9	20888175	20892178	protein_coding	peter pan homolog [Source:MGI Symbol;Acc:MGI:2178445]
ENSMUSG00000037315	212.975	232.387	226.347	183.284	216.647	215.407	174.316	167.072	174.417	157.466	214.508	168.318	0.350341	0.00557776	0.999941	Jade3	X	20425688	20519939	protein_coding	jade family PHD finger 3 [Source:MGI Symbol;Acc:MGI:2148019]
ENSMUSG00000002831	179.296	150.711	81.6717	255.813	60.6611	150.192	111.22	64.5505	43.8478	71.6558	146.391	72.8185	1.00992	0.00565606	0.999941	Plin4	17	56100591	56109803	protein_coding	perilipin 4 [Source:MGI Symbol;Acc:MGI:1929709]
ENSMUSG00000030739	1099.55	839.122	702.377	779.2	879.105	689.699	1059.8	991.989	1200.46	1188.96	831.508	1110.3	-0.416942	0.00579816	0.999941	Myh14	7	44605803	44670843	protein_coding	myosin, heavy polypeptide 14 [Source:MGI Symbol;Acc:MGI:1919210]
ENSMUSG00000041747	553.736	533.81	523.866	656.685	596.02	621.519	408.519	488.875	471.608	494.514	580.939	465.879	0.318004	0.00598154	0.999941	Utp15	13	98246845	98263041	protein_coding	UTP15 small subunit processome component [Source:MGI Symbol;Acc:MGI:2145443]
ENSMUSG00000073532	20.8023	20.419	26.835	34.3044	25.9976	20.7502	37.4298	39.8694	46.771	38.0395	24.8514	40.5274	-0.70698	0.0061389	0.999941	Gm7276	18	77185006	77186257	protein_coding	predicted gene 7276 [Source:MGI Symbol;Acc:MGI:3646549]
ENSMUSG00000030254	91.1337	140.988	133.008	158.78	89.5474	141.299	79.1372	108.217	76.9773	59.2709	125.793	80.9006	0.637387	0.00618368	0.999941	Rad18	6	112619850	112696686	protein_coding	RAD18 E3 ubiquitin protein ligase [Source:MGI Symbol;Acc:MGI:1890476]
ENSMUSG00000037465	544.821	605.763	828.385	241.111	318.712	313.23	324.035	214.535	248.471	276.008	475.337	265.762	0.838427	0.00626446	0.999941	Klf10	15	38291463	38300706	protein_coding	Kruppel-like factor 10 [Source:MGI Symbol;Acc:MGI:1101353]
ENSMUSG00000042348	638.926	660.213	791.049	657.665	612.389	575.078	550.752	514.505	525.2	523.707	655.887	528.541	0.310742	0.00649763	0.999941	Arl15	13	113794505	114157461	protein_coding	ADP-ribosylation factor-like 15 [Source:MGI Symbol;Acc:MGI:2442308]
ENSMUSG00000041700	7.92467	5.83399	8.16717	10.7814	5.77725	1.97621	0	0.949272	2.92319	1.76928	6.74345	1.41044	2.22826	0.00667986	0.999941	Lhfpl1	X	145290359	145349089	protein_coding	lipoma HMGIC fusion partner-like 1 [Source:MGI Symbol;Acc:MGI:1891214]
ENSMUSG00000035696	766.712	824.538	838.885	897.796	749.117	1297.38	687.639	758.468	544.687	563.516	895.738	638.578	0.488456	0.0069507	0.999941	Rnf38	4	44126210	44233789	protein_coding	ring finger protein 38 [Source:MGI Symbol;Acc:MGI:1920719]
ENSMUSG00000040113	24.7646	10.6957	19.8346	6.86088	17.3318	7.90486	2.13884	6.6449	3.89758	7.96176	14.5654	5.16077	1.47342	0.0070592	0.999941	Mettl11b	1	163702256	163725232	protein_coding	methyltransferase like 11B [Source:MGI Symbol;Acc:MGI:2685053]
ENSMUSG00000043432	93.1148	99.1779	113.174	89.1915	76.0671	72.1318	182.871	100.623	161.75	103.503	90.4761	137.187	-0.599754	0.00724605	0.999941	Leng9	7	4147915	4150374	protein_coding	leukocyte receptor cluster (LRC) member 9 [Source:MGI Symbol;Acc:MGI:2444509]
ENSMUSG00000031015	177.314	217.802	196.012	159.761	193.538	194.657	148.65	130.05	158.827	146.85	189.847	146.094	0.37813	0.00733939	0.999941	Swap70	7	110221711	110283506	protein_coding	SWA-70 protein [Source:MGI Symbol;Acc:MGI:1298390]
ENSMUSG00000040536	2097.06	2288.87	1992.79	1454.51	1704.29	1936.69	1513.23	1651.73	1191.69	1418.96	1912.37	1443.9	0.405365	0.00736226	0.999941	Necab1	4	14952245	15149794	protein_coding	N-terminal EF-hand calcium binding protein 1 [Source:MGI Symbol;Acc:MGI:1916602]
ENSMUSG00000089694	1.98117	4.86166	2.33348	2.94038	1.92575	2.96432	4.27769	12.3405	13.6415	6.19248	2.83446	9.11306	-1.68331	0.00739588	0.999941	Nat8f7	6	85706727	85713205	protein_coding	N-acetyltransferase 8 (GCN5-related) family member 7 [Source:MGI Symbol;Acc:MGI:3782661]
ENSMUSG00000039648	234.768	225.581	201.846	249.932	274.419	245.051	301.577	259.151	333.244	333.509	238.6	306.87	-0.36196	0.00752743	0.999941	Kyat1	2	30185124	30205847	protein_coding	kynurenine aminotransferase 1 [Source:MGI Symbol;Acc:MGI:1917516]
ENSMUSG00000027071	25.7552	26.253	32.6687	23.523	42.3665	23.7146	13.9025	23.7318	10.7184	14.1542	29.0468	15.6267	0.891093	0.00767441	0.999941	P2rx3	2	84998583	85037462	protein_coding	purinergic receptor P2X, ligand-gated ion channel, 3 [Source:MGI Symbol;Acc:MGI:1097160]
ENSMUSG00000039634	164.437	228.498	159.843	140.158	147.32	144.264	114.428	110.116	123.748	125.619	164.087	118.478	0.469564	0.00771999	0.999941	Zfp189	4	49521176	49531517	protein_coding	zinc finger protein 189 [Source:MGI Symbol;Acc:MGI:2444707]
ENSMUSG00000001542	452.697	456.996	444.528	450.858	547.876	497.018	343.285	388.252	356.629	434.358	474.995	380.631	0.318691	0.00786199	0.999941	Ell2	13	75706757	75772364	protein_coding	elongation factor RNA polymerase II 2 [Source:MGI Symbol;Acc:MGI:2183438]
ENSMUSG00000020134	749.872	799.257	753.713	805.664	756.82	838.903	692.986	622.723	669.41	681.173	784.038	666.573	0.234586	0.00796486	0.999941	Peli1	11	21091291	21150323	protein_coding	pellino 1 [Source:MGI Symbol;Acc:MGI:1914495]
ENSMUSG00000090176	0	0	0	0	0.962875	0	3.20827	2.84782	2.92319	2.65392	0.160479	2.9083	-3.48902	0.0079942	0.999941	Cd200r2	16	44867097	44915840	protein_coding	Cd200 receptor 2 [Source:MGI Symbol;Acc:MGI:3042847]
ENSMUSG00000022807	434.866	432.688	432.86	402.832	429.442	466.386	378.575	385.404	315.704	344.125	433.179	355.952	0.283768	0.00815154	0.999941	Osbpl11	16	33185071	33243312	protein_coding	oxysterol binding protein-like 11 [Source:MGI Symbol;Acc:MGI:2146553]
ENSMUSG00000046167	45.5668	48.6166	65.3374	39.205	37.5521	49.4053	44.9157	24.6811	20.4623	23.8853	47.6139	28.4861	0.746177	0.00849445	0.999941	Gldn	9	54286486	54341786	protein_coding	gliomedin [Source:MGI Symbol;Acc:MGI:2388361]
ENSMUSG00000032268	27.7363	26.253	15.1676	44.1057	41.4036	28.6551	29.9438	55.0578	88.6701	54.8477	30.5536	57.1298	-0.899572	0.00864972	0.999941	Tmprss5	9	49081260	49117587	protein_coding	transmembrane protease, serine 5 (spinesin) [Source:MGI Symbol;Acc:MGI:1933407]
ENSMUSG00000006782	6008.88	5591.88	5168.65	5057.45	4744.09	4260.72	6689.24	5538.05	7282.64	6401.26	5138.61	6477.8	-0.334107	0.0087517	0.999941	Cnp	11	100574904	100591729	protein_coding	2',3'-cyclic nucleotide 3' phosphodiesterase [Source:MGI Symbol;Acc:MGI:88437]
ENSMUSG00000037010	596.331	385.043	378.023	366.567	484.326	297.42	456.643	584.752	725.925	656.403	417.952	605.931	-0.535979	0.00882915	0.999941	Apln	X	48025146	48034853	protein_coding	apelin [Source:MGI Symbol;Acc:MGI:1353624]
ENSMUSG00000020246	635.955	650.49	674.375	664.526	706.75	794.438	466.268	608.483	537.867	598.901	687.756	552.88	0.314031	0.0088414	0.999941	Hcfc2	10	82696160	82742428	protein_coding	host cell factor C2 [Source:MGI Symbol;Acc:MGI:1915183]
ENSMUSG00000026424	3856.34	3543.18	3357.87	3978.33	3920.83	3375.37	4240.26	3917.65	4926.55	4733.71	3671.99	4454.54	-0.278676	0.00905182	0.999941	Gpr37l1	1	135160234	135167681	protein_coding	G protein-coupled receptor 37-like 1 [Source:MGI Symbol;Acc:MGI:1928503]
ENSMUSG00000039167	363.544	304.34	277.684	292.078	347.598	491.089	161.483	261.999	292.319	234.43	346.055	237.558	0.542224	0.00907367	0.999941	Adgrl4	3	151437887	151545086	protein_coding	adhesion G protein-coupled receptor L4 [Source:MGI Symbol;Acc:MGI:2655562]
ENSMUSG00000054720	555.717	588.261	460.862	443.997	611.426	530.613	448.088	472.738	348.834	360.933	531.813	407.648	0.384645	0.00915123	0.999941	Lrrc8c	5	105519388	105613018	protein_coding	leucine rich repeat containing 8 family, member C [Source:MGI Symbol;Acc:MGI:2140839]
ENSMUSG00000027570	339.77	287.81	289.351	294.038	305.231	267.777	376.437	307.564	506.686	379.511	297.33	392.549	-0.400525	0.00918575	0.999941	Col9a3	2	180597790	180622189	protein_coding	collagen, type IX, alpha 3 [Source:MGI Symbol;Acc:MGI:894686]
ENSMUSG00000034810	85.1902	141.96	130.675	83.3107	225.313	84.9772	66.3042	83.5359	74.0541	72.5405	125.238	74.1087	0.75667	0.00933586	0.999941	Scn7a	2	66673425	66784914	protein_coding	sodium channel, voltage-gated, type VII, alpha [Source:MGI Symbol;Acc:MGI:102965]
ENSMUSG00000026519	569.585	577.565	492.364	542.01	698.084	638.317	685.5	825.867	674.282	776.714	586.321	740.591	-0.336673	0.0093869	0.999941	Tmem63a	1	180942344	180975112	protein_coding	transmembrane protein 63a [Source:MGI Symbol;Acc:MGI:2384789]
ENSMUSG00000079339	63.3973	55.4229	75.838	43.1256	34.6635	47.4291	38.4992	24.6811	34.1039	33.6163	53.3127	32.7251	0.701704	0.0094377	0.999941	Ifit1bl1	19	34592888	34601968	protein_coding	interferon induced protein with tetratricpeptide repeats 1B like 1 [Source:MGI Symbol;Acc:MGI:3650685]
ENSMUSG00000028360	225.853	302.395	250.849	255.813	305.231	282.599	177.524	253.456	202.674	189.313	270.457	205.742	0.394435	0.00963908	0.999941	Slc44a5	3	153973436	154271722	protein_coding	solute carrier family 44, member 5 [Source:MGI Symbol;Acc:MGI:3035141]
ENSMUSG00000024160	127.785	138.071	106.173	125.456	101.102	88.9296	218.162	134.797	136.415	163.658	114.586	163.258	-0.50829	0.00969544	0.999941	Spsb3	17	24886643	24892152	protein_coding	splA/ryanodine receptor domain and SOCS box containing 3 [Source:MGI Symbol;Acc:MGI:1891471]
ENSMUSG00000024940	917.28	838.15	758.38	968.365	1080.35	902.142	1059.8	1183.74	1106.91	1150.92	910.777	1125.34	-0.304825	0.0097125	0.999941	Ltbp3	19	5740904	5758532	protein_coding	latent transforming growth factor beta binding protein 3 [Source:MGI Symbol;Acc:MGI:1101355]
ENSMUSG00000037166	318.968	178.909	285.851	207.787	169.466	133.394	416.005	205.043	421.914	354.741	215.729	349.426	-0.696311	0.00977564	0.999941	Ppp1r14a	7	29289308	29293801	protein_coding	protein phosphatase 1, regulatory inhibitor subunit 14A [Source:MGI Symbol;Acc:MGI:1931139]
ENSMUSG00000039990	520.056	554.229	539.033	506.725	601.797	696.615	362.534	493.621	411.195	495.398	569.743	440.687	0.36967	0.00979832	0.999941	Edrf1	7	133637543	133672971	protein_coding	erythroid differentiation regulatory factor 1 [Source:MGI Symbol;Acc:MGI:1919831]
ENSMUSG00000002820	473.499	364.624	351.188	470.461	391.89	339.909	526.156	523.998	489.147	490.975	398.595	507.569	-0.347919	0.00983892	0.999941	Atg4d	9	21265293	21277772	protein_coding	autophagy related 4D, cysteine peptidase [Source:MGI Symbol;Acc:MGI:2444308]
ENSMUSG00000020482	461.612	346.15	416.526	366.567	388.039	436.743	295.161	305.666	341.039	344.125	402.606	321.497	0.323443	0.0102259	0.999941	Ccdc117	11	5528887	5542187	protein_coding	coiled-coil domain containing 117 [Source:MGI Symbol;Acc:MGI:2144383]
ENSMUSG00000058835	2020.79	2249	2279.81	2186.66	1917.08	2250.91	1832.99	1834.94	1864.02	1848.9	2150.71	1845.21	0.220848	0.0103483	0.999941	Abi1	2	22940073	23040241	protein_coding	abl-interactor 1 [Source:MGI Symbol;Acc:MGI:104913]
ENSMUSG00000022246	219.91	154.601	206.513	188.184	187.761	200.586	148.65	139.543	152.006	159.235	192.926	149.858	0.363045	0.0106155	0.999941	Rai14	15	10568969	10714624	protein_coding	retinoic acid induced 14 [Source:MGI Symbol;Acc:MGI:1922896]
ENSMUSG00000036769	400.196	339.344	360.522	373.428	419.814	461.446	271.633	331.296	320.576	324.663	392.458	312.042	0.330208	0.0107595	0.999941	Wdr44	X	23693051	23806025	protein_coding	WD repeat domain 44 [Source:MGI Symbol;Acc:MGI:1919654]
ENSMUSG00000019970	2024.75	1715.19	1425.75	1684.84	1634.96	1436.71	1568.84	888.519	1115.68	1325.19	1653.7	1224.56	0.433772	0.0110178	0.999941	Sgk1	10	21882184	21999903	protein_coding	serum/glucocorticoid regulated kinase 1 [Source:MGI Symbol;Acc:MGI:1340062]
ENSMUSG00000033213	1.98117	0.972332	0	0.980126	0	2.96432	6.41653	5.69563	9.74396	1.76928	1.14966	5.90635	-2.33512	0.0111531	0.999941	AA467197	2	122636986	122641191	protein_coding	expressed sequence AA467197 [Source:MGI Symbol;Acc:MGI:3034182]
ENSMUSG00000020015	3478.93	3430.39	4010.08	3547.08	3352.73	3615.48	2991.17	3083.24	3158.99	3128.09	3572.45	3090.37	0.208865	0.0112144	0.999941	Cdk17	10	93160875	93267071	protein_coding	cyclin-dependent kinase 17 [Source:MGI Symbol;Acc:MGI:97517]
ENSMUSG00000032281	3185.72	2972.42	2633.33	3106.02	3001.28	2605.64	3438.19	3446.81	3309.05	3572.18	2917.4	3441.56	-0.238264	0.0112644	0.999941	Acsbg1	9	54604877	54661870	protein_coding	acyl-CoA synthetase bubblegum family member 1 [Source:MGI Symbol;Acc:MGI:2385656]
ENSMUSG00000000552	1326.39	1291.26	1062.9	1390.8	1167	1000.95	1562.43	1397.33	1536.62	1479.12	1206.55	1493.87	-0.307814	0.0115074	0.999941	Zfp385a	15	103313895	103340093	protein_coding	zinc finger protein 385A [Source:MGI Symbol;Acc:MGI:1352495]
ENSMUSG00000032271	11.887	9.72332	23.3348	14.7019	12.5174	8.89296	6.41653	0	7.79517	6.19248	13.5096	5.10105	1.40196	0.011515	0.999941	Nnmt	9	48591877	48605153	protein_coding	nicotinamide N-methyltransferase [Source:MGI Symbol;Acc:MGI:1099443]
ENSMUSG00000029211	2283.29	2327.76	2446.65	1910.27	2090.4	2148.14	1841.55	1867.22	1817.25	1916.13	2201.09	1860.54	0.242211	0.0118777	0.999941	Gabra4	5	71569749	71658308	protein_coding	gamma-aminobutyric acid (GABA) A receptor, subunit alpha 4 [Source:MGI Symbol;Acc:MGI:95616]
ENSMUSG00000032968	439.819	380.182	354.689	391.07	443.885	332.004	535.781	418.629	515.456	494.514	390.275	491.095	-0.330507	0.0119873	0.999941	Inha	1	75507077	75510366	protein_coding	inhibin alpha [Source:MGI Symbol;Acc:MGI:96569]
ENSMUSG00000063851	0	0	0	0	0	0	1.06942	2.84782	4.87198	1.76928	0	2.63962	-3.83359	0.0120703	0.999941	Rnf183	4	62427540	62435252	protein_coding	ring finger protein 183 [Source:MGI Symbol;Acc:MGI:1923322]
ENSMUSG00000042861	2.97175	1.94466	5.83369	3.9205	0.962875	1.97621	0	0	0.974396	0	2.93495	0.243599	3.30744	0.0123159	0.999941	Kcna10	3	107183056	107195721	protein_coding	potassium voltage-gated channel, shaker-related subfamily, member 10 [Source:MGI Symbol;Acc:MGI:3037820]
ENSMUSG00000024286	2172.35	2254.84	2118.8	2061.21	2063.44	2153.08	1813.74	1984.93	1838.69	1878.98	2137.29	1879.08	0.185632	0.0124709	0.999941	Ccny	18	9314044	9450150	protein_coding	cyclin Y [Source:MGI Symbol;Acc:MGI:1915224]
ENSMUSG00000029096	80.2373	82.6482	113.174	111.734	103.028	92.882	119.775	131.949	143.236	122.08	97.2839	129.26	-0.412242	0.0125821	0.999941	Htra3	5	35652023	35679782	protein_coding	HtrA serine peptidase 3 [Source:MGI Symbol;Acc:MGI:1925808]
ENSMUSG00000025090	0	0.972332	0	0.980126	0	0	2.13884	3.79709	2.92319	3.53856	0.32541	3.09942	-3.10655	0.0125936	0.999941	Ccdc172	19	58512002	58553085	protein_coding	coiled-coil domain containing 172 [Source:MGI Symbol;Acc:MGI:1922895]
ENSMUSG00000051674	1999.99	2165.38	2186.47	1988.68	2080.77	2176.8	1782.73	1977.33	1705.19	1806.44	2099.68	1817.92	0.207689	0.0127216	0.999941	Dcun1d4	5	73481000	73560794	protein_coding	DCN1, defective in cullin neddylation 1, domain containing 4 (S. cerevisiae) [Source:MGI Symbol;Acc:MGI:2140972]
ENSMUSG00000026782	3508.65	3868.91	4042.75	3611.76	3588.64	3830.89	3294.89	3297.77	3321.72	3195.32	3741.93	3277.42	0.191122	0.0128243	0.999941	Abi2	1	60409619	60481158	protein_coding	abl-interactor 2 [Source:MGI Symbol;Acc:MGI:106913]
ENSMUSG00000044807	798.41	899.407	862.22	944.842	882.956	965.38	688.708	824.917	759.055	724.52	892.203	749.3	0.251689	0.0128553	0.999941	Zfp354c	11	50811086	50827724	protein_coding	zinc finger protein 354C [Source:MGI Symbol;Acc:MGI:1353621]
ENSMUSG00000029563	496.282	473.526	567.035	478.302	452.551	536.542	405.311	433.817	424.837	398.973	500.706	415.734	0.267335	0.0128707	0.999941	Foxp2	6	14901349	15441977	protein_coding	forkhead box P2 [Source:MGI Symbol;Acc:MGI:2148705]
ENSMUSG00000033763	3872.19	3957.39	2574.99	3494.15	3565.53	3117.48	4289.45	4660.93	3964.82	4432.93	3430.29	4337.03	-0.338241	0.0128959	0.999941	Mtss1l	8	110721476	110741400	protein_coding	metastasis suppressor 1-like [Source:MGI Symbol;Acc:MGI:3039591]
ENSMUSG00000025981	385.337	430.743	479.53	330.303	361.078	461.446	340.076	278.137	318.628	337.048	408.073	318.472	0.356997	0.0128982	0.999941	Coq10b	1	55052770	55072702	protein_coding	coenzyme Q10B [Source:MGI Symbol;Acc:MGI:1915126]
ENSMUSG00000053286	561.661	488.111	593.87	513.586	531.507	581.995	387.131	456.6	474.531	475.052	545.122	448.328	0.280448	0.0130212	0.999941	Trmt1l	1	151428542	151458161	protein_coding	tRNA methyltransferase 1 like [Source:MGI Symbol;Acc:MGI:1916185]
ENSMUSG00000034923	8.91525	5.83399	7.00043	8.82114	11.5545	15.8097	13.9025	18.9854	23.3855	19.4621	9.65584	18.9339	-0.969543	0.0131572	0.999941	Ly6g6f	17	35080480	35085610	protein_coding	lymphocyte antigen 6 complex, locus G6F [Source:MGI Symbol;Acc:MGI:3616082]
ENSMUSG00000079773	51.5103	27.2253	25.6683	35.2845	21.1833	3.95243	75.929	62.652	60.4126	35.3856	27.4707	58.5948	-1.09091	0.0134905	0.999941	AC087559.2	GL456350.1	173252	174286	protein_coding
ENSMUSG00000033200	0	0	0	0	0	0	3.20827	4.74636	4.87198	0	0	3.20665	-4.10896	0.0135458	0.999941	Tpsg1	17	25369273	25374442	protein_coding	tryptase gamma 1 [Source:MGI Symbol;Acc:MGI:1349391]
ENSMUSG00000054256	477.461	457.968	354.689	473.401	407.296	336.944	521.878	458.498	601.202	570.593	417.96	538.043	-0.363841	0.013552	0.999941	Msi1	5	115429599	115455698	protein_coding	musashi RNA-binding protein 1 [Source:MGI Symbol;Acc:MGI:107376]
ENSMUSG00000045954	247.646	202.245	208.846	224.449	212.795	282.599	196.774	163.275	171.494	186.659	229.763	179.55	0.3569	0.0135943	0.999941	Cavin2	1	51289126	51302960	protein_coding	caveolae associated 2 [Source:MGI Symbol;Acc:MGI:99513]
ENSMUSG00000003208	127.785	101.123	119.007	104.873	85.6959	62.2507	157.205	119.608	143.236	148.62	100.123	142.167	-0.507039	0.0136435	0.999941	Yju2	17	55959099	55968285	protein_coding	YJU2 splicing factor [Source:MGI Symbol;Acc:MGI:1920136]
ENSMUSG00000071724	5.9435	3.88933	5.83369	2.94038	0.962875	2.96432	10.6942	11.3913	9.74396	7.07712	3.75568	9.72664	-1.38495	0.0136765	0.999941	Smpd5	15	76294348	76296896	protein_coding	sphingomyelin phosphodiesterase 5 [Source:MGI Symbol;Acc:MGI:3709877]
ENSMUSG00000025739	210.994	96.2609	150.509	228.369	181.021	159.085	224.579	160.427	412.17	305.201	171.04	275.594	-0.688181	0.0137388	0.999941	Gng13	17	25717171	25719406	protein_coding	guanine nucleotide binding protein (G protein), gamma 13 [Source:MGI Symbol;Acc:MGI:1925616]
ENSMUSG00000032766	178.305	145.85	233.348	226.409	175.243	226.276	218.162	206.941	404.374	324.663	197.572	288.535	-0.547761	0.0137939	0.999941	Gng11	6	4003904	4008445	protein_coding	guanine nucleotide binding protein (G protein), gamma 11 [Source:MGI Symbol;Acc:MGI:1913316]
ENSMUSG00000033623	933.13	959.692	917.057	886.034	887.771	1026.64	659.834	887.569	663.564	829.792	935.054	760.19	0.298029	0.0139473	0.999941	Pcgf3	5	108461232	108506976	protein_coding	polycomb group ring finger 3 [Source:MGI Symbol;Acc:MGI:1916837]
ENSMUSG00000033715	35.661	30.1423	33.8354	28.4237	42.3665	42.4886	12.8331	28.4782	22.4111	23.0006	35.4862	21.6807	0.703288	0.0139695	0.999941	Akr1c14	13	4049011	4090688	protein_coding	aldo-keto reductase family 1, member C14 [Source:MGI Symbol;Acc:MGI:2145458]
ENSMUSG00000029816	125.804	116.68	145.842	111.734	149.246	126.478	102.665	70.2461	97.4396	111.465	129.297	95.4537	0.436533	0.0140453	0.999941	Gpnmb	6	49036546	49070929	protein_coding	glycoprotein (transmembrane) nmb [Source:MGI Symbol;Acc:MGI:1934765]
ENSMUSG00000043311	162.456	168.213	133.008	160.741	141.543	115.609	222.44	149.985	203.649	208.775	146.928	196.212	-0.415707	0.0140503	0.999941	D17H6S53E	17	35126373	35128855	protein_coding	DNA segment, Chr 17, human D6S53E [Source:MGI Symbol;Acc:MGI:90673]
ENSMUSG00000032109	114.908	129.32	105.006	101.933	93.3989	77.0723	192.496	135.746	134.467	118.542	103.606	145.313	-0.485344	0.0140989	0.999941	Nlrx1	9	44252717	44268599	protein_coding	NLR family member X1 [Source:MGI Symbol;Acc:MGI:2429611]
ENSMUSG00000049421	1072.8	1138.6	1151.57	1264.36	1229.59	1415.96	926.12	1095.46	951.011	1033.26	1212.15	1001.46	0.275274	0.0141041	0.999941	Zfp260	7	30094777	30107622	protein_coding	zinc finger protein 260 [Source:MGI Symbol;Acc:MGI:1347071]
ENSMUSG00000024330	475.48	352.957	298.685	258.753	393.816	290.503	525.086	382.557	494.019	493.629	345.032	473.823	-0.456974	0.0141929	0.999941	Col11a2	17	34039437	34066685	protein_coding	collagen, type XI, alpha 2 [Source:MGI Symbol;Acc:MGI:88447]
ENSMUSG00000017707	4899.43	4764.43	5430	4919.25	4805.71	5195.47	4396.39	4344.82	4412.07	4491.32	5002.38	4411.15	0.18131	0.0142231	0.999941	Serinc3	2	163623272	163645131	protein_coding	serine incorporator 3 [Source:MGI Symbol;Acc:MGI:1349457]
ENSMUSG00000034863	1423.47	1287.37	1316.08	1269.26	1262.33	1076.05	1616.97	1321.39	1646.73	1579.97	1272.43	1541.26	-0.276517	0.0145977	0.999941	Ano8	8	71476019	71485963	protein_coding	anoctamin 8 [Source:MGI Symbol;Acc:MGI:2687327]
ENSMUSG00000045625	128.776	179.881	168.01	169.562	135.765	164.026	209.607	168.97	233.855	209.66	157.67	205.523	-0.38271	0.0146084	0.999941	Pigz	16	31933851	31946046	protein_coding	phosphatidylinositol glycan anchor biosynthesis, class Z [Source:MGI Symbol;Acc:MGI:2443822]
ENSMUSG00000040978	43.5857	45.6996	46.6696	24.5032	25.9976	29.6432	28.8744	15.1884	23.3855	16.8082	36.0165	21.0641	0.77854	0.0146452	0.999941	Gm11992	11	9048594	9069356	protein_coding	predicted gene 11992 [Source:MGI Symbol;Acc:MGI:3651127]
ENSMUSG00000059325	333.827	276.142	316.186	344.024	422.702	290.503	411.728	316.108	654.794	481.244	330.564	465.968	-0.49521	0.0147979	0.999941	Hopx	5	77086988	77115121	protein_coding	HOP homeobox [Source:MGI Symbol;Acc:MGI:1916782]
ENSMUSG00000030237	580.482	691.328	588.036	959.544	966.727	1506.86	463.06	635.063	606.074	588.286	882.163	573.121	0.62223	0.0148843	0.999941	Slco1a4	6	141805440	141856199	protein_coding	solute carrier organic anion transporter family, member 1a4 [Source:MGI Symbol;Acc:MGI:1351896]
ENSMUSG00000072780	0.990583	0	0	0.980126	0	0	11.7636	0.949272	0.974396	1.76928	0.328452	3.86415	-3.40398	0.0149086	0.999941	Vmn2r24	6	123778879	123824912	protein_coding	vomeronasal 2, receptor 24 [Source:MGI Symbol;Acc:MGI:3647530]
ENSMUSG00000003604	153.54	133.209	161.01	164.661	163.689	133.394	217.093	152.833	228.009	193.736	151.584	197.918	-0.384229	0.0149109	0.999941	Aven	2	112492964	112634573	protein_coding	apoptosis, caspase activation inhibitor [Source:MGI Symbol;Acc:MGI:1921518]
ENSMUSG00000078735	4.95292	0.972332	0	13.7218	0.962875	1.97621	7.48596	28.4782	13.6415	8.8464	3.76435	14.613	-1.94622	0.0150761	0.999941	Il11ra2	4	42656355	42661893	protein_coding	interleukin 11 receptor, alpha chain 2 [Source:MGI Symbol;Acc:MGI:109123]
ENSMUSG00000071573	28.7269	37.9209	36.1689	29.4038	45.2551	22.7265	49.1934	48.4129	59.4382	45.1166	33.367	50.5403	-0.59841	0.0151576	0.999941	Rnls	19	33137747	33392295	protein_coding	renalase, FAD-dependent amine oxidase [Source:MGI Symbol;Acc:MGI:1915045]
ENSMUSG00000056380	31.6987	20.419	64.1706	11.7615	8.66588	22.7265	14.9719	10.442	6.82077	11.5003	26.5737	10.9337	1.2755	0.0151881	0.999941	Gpr50	X	71663667	71669257	protein_coding	G-protein-coupled receptor 50 [Source:MGI Symbol;Acc:MGI:1333877]
ENSMUSG00000024068	1241.2	1168.74	1248.41	1326.11	1271.96	1463.39	1035.2	1143.87	1110.81	1093.42	1286.63	1095.83	0.231463	0.0153338	0.999941	Spast	17	74338987	74391115	protein_coding	spastin [Source:MGI Symbol;Acc:MGI:1858896]
ENSMUSG00000116594	92.1243	108.901	74.6713	86.2511	95.3246	85.9653	117.636	97.775	121.8	154.812	90.5396	123.006	-0.441623	0.0154805	0.999941	AC133488.1	16	18620466	18626427	protein_coding	novel protein
ENSMUSG00000032849	288.26	256.696	170.344	246.012	273.457	240.11	206.398	189.854	143.236	194.621	245.813	183.527	0.423468	0.015496	0.999941	Abcc4	14	118482692	118706219	protein_coding	ATP-binding cassette, sub-family C (CFTR/MRP), member 4 [Source:MGI Symbol;Acc:MGI:2443111]
ENSMUSG00000041957	227.834	195.439	210.013	146.039	149.246	142.287	141.164	131.949	130.569	122.965	178.476	131.662	0.438492	0.0157208	0.999941	Pkp2	16	16213318	16272712	protein_coding	plakophilin 2 [Source:MGI Symbol;Acc:MGI:1914701]
ENSMUSG00000036825	1930.65	1955.36	2159.63	1800.49	1707.18	1797.37	1789.14	1515.04	1558.06	1472.93	1891.78	1583.79	0.256434	0.0158907	0.999941	Ssx2ip	3	146404642	146440144	protein_coding	synovial sarcoma, X 2 interacting protein [Source:MGI Symbol;Acc:MGI:2139150]
ENSMUSG00000031493	17.8305	14.585	10.5006	13.7218	14.4431	11.8573	18.1802	24.6811	23.3855	28.3085	13.8231	23.6388	-0.774674	0.0159399	0.999941	Ggn	7	29170210	29173976	protein_coding	gametogenetin [Source:MGI Symbol;Acc:MGI:2181461]
ENSMUSG00000056492	558.689	573.676	305.686	510.646	657.644	716.378	437.394	443.31	294.268	360.049	553.786	383.755	0.530051	0.0161295	0.999941	Adgrf5	17	43360451	43459557	protein_coding	adhesion G protein-coupled receptor F5 [Source:MGI Symbol;Acc:MGI:2182928]
ENSMUSG00000038777	590.388	432.688	404.858	596.897	510.324	418.957	639.515	562.918	658.692	673.211	492.352	633.584	-0.363309	0.0161632	0.999941	Sema6c	3	95160457	95174024	protein_coding	sema domain, transmembrane domain (TM), and cytoplasmic domain, (semaphorin) 6C [Source:MGI Symbol;Acc:MGI:1338032]
ENSMUSG00000023905	110.945	56.3953	65.3374	92.1319	50.0695	55.334	91.9703	98.7243	124.723	119.426	71.7022	108.711	-0.601167	0.0163093	0.999941	Tnfrsf12a	17	23675445	23677468	protein_coding	tumor necrosis factor receptor superfamily, member 12a [Source:MGI Symbol;Acc:MGI:1351484]
ENSMUSG00000071847	320.949	355.874	287.018	307.76	354.338	316.194	304.785	227.825	234.829	272.469	323.689	259.977	0.318096	0.016448	0.999941	Apcdd1	18	62922327	62953195	protein_coding	adenomatosis polyposis coli down-regulated 1 [Source:MGI Symbol;Acc:MGI:3513977]
ENSMUSG00000035847	9113.37	10760.8	9258.07	8914.25	9430.4	10229.9	7975.75	9058.9	7753.27	8086.5	9617.79	8218.61	0.226814	0.0167623	0.999941	Ids	X	70343069	70365084	protein_coding	iduronate 2-sulfatase [Source:MGI Symbol;Acc:MGI:96417]
ENSMUSG00000041607	50358.3	45875.6	38958.6	43326.5	38962.7	38479.8	50436.1	45957.1	57208.7	53658.7	42660.3	51815.2	-0.280478	0.0167633	0.999941	Mbp	18	82475146	82585637	protein_coding	myelin basic protein [Source:MGI Symbol;Acc:MGI:96925]
ENSMUSG00000026037	425.951	421.992	464.362	516.526	464.106	535.554	374.298	429.071	386.835	355.625	471.415	386.457	0.286823	0.0167959	0.999941	Orc2	1	58462771	58505109	protein_coding	origin recognition complex, subunit 2 [Source:MGI Symbol;Acc:MGI:1328306]
ENSMUSG00000021770	1511.63	1776.45	1527.26	1659.35	1856.42	1879.38	1153.91	1624.2	1331.03	1408.35	1701.75	1379.37	0.302864	0.01689	0.999941	Samd8	14	21750531	21798726	protein_coding	sterile alpha motif domain containing 8 [Source:MGI Symbol;Acc:MGI:1914880]
ENSMUSG00000032590	362.554	361.707	344.188	500.844	468.92	451.565	485.518	485.078	580.74	571.477	414.963	530.703	-0.35452	0.0170366	0.999941	Apeh	9	108085413	108094606	protein_coding	acylpeptide hydrolase [Source:MGI Symbol;Acc:MGI:88041]
ENSMUSG00000030103	2420	2540.7	1850.45	1459.41	1513.64	1514.77	1622.31	1233.1	1337.85	1293.34	1883.16	1371.65	0.457399	0.0171473	0.999941	Bhlhe40	6	108660629	108666925	protein_coding	basic helix-loop-helix family, member e40 [Source:MGI Symbol;Acc:MGI:1097714]
ENSMUSG00000038007	173.352	147.794	176.178	140.158	157.912	176.871	152.927	110.116	120.825	119.426	162.044	125.824	0.366799	0.0171871	0.999941	Acer2	4	86874396	86934822	protein_coding	alkaline ceramidase 2 [Source:MGI Symbol;Acc:MGI:1920932]
ENSMUSG00000090824	0.990583	0	0	0	0.962875	0	3.20827	3.79709	2.92319	1.76928	0.325576	2.92446	-3.01385	0.0173307	0.999941	Olfr1344	7	6438688	6442161	protein_coding	olfactory receptor 1344 [Source:MGI Symbol;Acc:MGI:3031178]
ENSMUSG00000030557	2938.07	3287.45	3223.7	3313.81	3210.23	3447.51	2790.12	3048.11	2750.72	2693.73	3236.79	2820.67	0.198554	0.017403	0.999941	Mef2a	7	67231163	67372858	protein_coding	myocyte enhancer factor 2A [Source:MGI Symbol;Acc:MGI:99532]
ENSMUSG00000018973	0.990583	0	0	0	0	0.988107	2.13884	1.89854	1.94879	6.19248	0.329782	3.04467	-3.08633	0.0174032	0.999941	Hoxb1	11	96365752	96368256	protein_coding	homeobox B1 [Source:MGI Symbol;Acc:MGI:96182]
ENSMUSG00000079184	840.015	830.372	973.06	896.815	981.17	1057.27	587.113	820.171	789.261	793.522	929.784	747.517	0.314005	0.0174216	0.999941	Mphosph8	14	56668248	56697430	protein_coding	M-phase phosphoprotein 8 [Source:MGI Symbol;Acc:MGI:1922589]
ENSMUSG00000006301	690.437	552.285	708.211	719.413	816.518	765.783	777.47	860.041	995.833	895.256	708.774	882.15	-0.315927	0.0175798	0.999941	Tmbim1	1	74288247	74305622	protein_coding	transmembrane BAX inhibitor motif containing 1 [Source:MGI Symbol;Acc:MGI:1916910]
ENSMUSG00000097084	4.95292	0	1.16674	6.86088	0.962875	0.988107	0	0	0	0	2.48859	0	3.8096	0.0177341	0.999941	Foxl1	8	121127940	121130644	protein_coding	forkhead box L1 [Source:MGI Symbol;Acc:MGI:1347469]
ENSMUSG00000044857	654.776	541.589	565.868	504.765	528.618	368.564	780.678	557.223	736.644	701.52	527.363	694.016	-0.396103	0.0177656	0.999941	Lemd2	17	27189601	27204438	protein_coding	LEM domain containing 2 [Source:MGI Symbol;Acc:MGI:2385045]
ENSMUSG00000037358	13.8682	8.75099	9.33391	19.6025	25.9976	14.8216	6.41653	13.2898	2.92319	3.53856	15.3958	6.54202	1.2418	0.0178529	0.999941	4930578C19Rik	X	18414881	18461397	protein_coding	RIKEN cDNA 4930578C19 gene [Source:MGI Symbol;Acc:MGI:1923155]
ENSMUSG00000027257	546.802	544.506	466.696	612.579	525.73	387.338	699.402	514.505	832.134	665.249	513.942	677.823	-0.398856	0.0178968	0.999941	Pacsin3	2	91255954	91264679	protein_coding	protein kinase C and casein kinase substrate in neurons 3 [Source:MGI Symbol;Acc:MGI:1891410]
ENSMUSG00000046449	786.523	934.411	774.715	677.267	714.453	864.594	594.599	745.179	492.07	654.634	791.994	621.62	0.349174	0.0180256	0.999941	Nexmif	X	104077434	104201185	protein_coding	neurite extension and migration factor [Source:MGI Symbol;Acc:MGI:2148050]
ENSMUSG00000096257	30.7081	12.6403	19.8346	14.7019	15.406	16.7978	39.5686	25.6303	40.9246	22.116	18.3481	32.0599	-0.802401	0.0180509	0.999941	Ccer2	7	28756174	28758968	protein_coding	coiled-coil glutamate-rich protein 2 [Source:MGI Symbol;Acc:MGI:3645242]
ENSMUSG00000114133	142.644	164.324	191.345	165.641	127.1	174.895	120.845	107.268	148.108	111.465	160.992	121.921	0.400174	0.0181549	0.999941	Gm20075	13	96079216	96081376	protein_coding	predicted gene, 20075 [Source:MGI Symbol;Acc:MGI:5012260]
ENSMUSG00000040242	2003.95	1854.24	2259.97	1865.18	2062.48	2281.54	1724.98	1818.81	1766.58	1678.16	2054.56	1747.13	0.233658	0.0181625	0.999941	Fgfr1op2	6	146577203	146599198	protein_coding	FGFR1 oncogene partner 2 [Source:MGI Symbol;Acc:MGI:1914779]
ENSMUSG00000051079	1.98117	18.4743	24.5015	4.90063	1.92575	4.94053	4.27769	2.84782	0.974396	0.88464	9.45398	2.24614	2.08395	0.0182667	0.999941	Rgs13	1	144138654	144177372	protein_coding	regulator of G-protein signaling 13 [Source:MGI Symbol;Acc:MGI:2180585]
ENSMUSG00000026904	4016.82	5030.85	5236.32	4598.75	4854.82	5101.6	3349.43	4391.33	3916.1	4194.08	4806.52	3962.74	0.278323	0.0183039	0.999941	Slc4a10	2	62046462	62326730	protein_coding	solute carrier family 4, sodium bicarbonate cotransporter-like, member 10 [Source:MGI Symbol;Acc:MGI:2150150]
ENSMUSG00000023959	125.804	102.095	103.84	147.999	155.986	205.526	93.0397	111.065	76.9773	106.157	140.208	96.8097	0.534688	0.018312	0.999941	Clic5	17	44188584	44280172	protein_coding	chloride intracellular channel 5 [Source:MGI Symbol;Acc:MGI:1917912]
ENSMUSG00000033256	605.246	503.668	449.194	891.915	640.312	589.9	706.888	686.324	1217.02	895.256	613.373	876.372	-0.51454	0.0184262	0.999941	Shf	2	122348892	122369162	protein_coding	Src homology 2 domain containing F [Source:MGI Symbol;Acc:MGI:3613669]
ENSMUSG00000002871	531.943	460.885	466.696	586.115	605.648	508.875	582.835	596.143	711.309	709.481	526.694	649.942	-0.303276	0.0186041	0.999941	Tpra1	6	88902251	88912238	protein_coding	transmembrane protein, adipocyte asscociated 1 [Source:MGI Symbol;Acc:MGI:1345190]
ENSMUSG00000020589	3469.02	3708.47	3319.37	3041.33	3439.39	3321.03	2860.7	3195.25	2816.98	2801.66	3383.1	2918.65	0.213072	0.0187645	0.999941	Fam49a	12	12262139	12380965	protein_coding	family with sequence similarity 49, member A [Source:MGI Symbol;Acc:MGI:1261783]
ENSMUSG00000054723	189.201	201.273	179.678	206.807	174.28	182.8	244.898	197.449	293.293	222.929	189.006	239.642	-0.341211	0.0187907	0.999941	Vmac	17	56713936	56718022	protein_coding	vimentin-type intermediate filament associated coiled-coil protein [Source:MGI Symbol;Acc:MGI:2146912]
ENSMUSG00000051113	58.4444	70.0079	72.3378	66.6486	57.7725	70.1556	120.845	75.9418	95.4908	73.4251	65.8945	91.4256	-0.469155	0.0188816	0.999941	Fam71e1	7	44496581	44501486	protein_coding	family with sequence similarity 71, member E1 [Source:MGI Symbol;Acc:MGI:1922788]
ENSMUSG00000093803	464.584	429.771	411.859	392.05	339.895	378.445	680.153	428.122	472.582	498.052	402.767	519.727	-0.36704	0.0191253	0.999941	Ppp2r3d	9	124422622	124476898	protein_coding	protein phosphatase 2 (formerly 2A), regulatory subunit B'', delta [Source:MGI Symbol;Acc:MGI:1335093]
ENSMUSG00000022218	14.8588	5.83399	30.3352	13.7218	17.3318	8.89296	6.41653	8.54345	6.82077	4.4232	15.1624	6.55099	1.20288	0.0194378	0.999941	Tgm1	14	55700009	55713926	protein_coding	transglutaminase 1, K polypeptide [Source:MGI Symbol;Acc:MGI:98730]
ENSMUSG00000030630	361.563	353.929	347.688	348.925	348.561	346.826	475.893	403.441	419.965	373.318	351.249	418.154	-0.249897	0.0194636	0.999941	Fah	7	84585159	84606722	protein_coding	fumarylacetoacetate hydrolase [Source:MGI Symbol;Acc:MGI:95482]
ENSMUSG00000044034	1.98117	2.917	5.83369	5.88076	0.962875	3.95243	12.8331	4.74636	15.5903	6.19248	3.58799	9.84056	-1.46277	0.0195917	0.999941	Npb	11	120608477	120609093	protein_coding	neuropeptide B [Source:MGI Symbol;Acc:MGI:2387153]
ENSMUSG00000041134	45.5668	89.4545	43.1693	81.3505	123.248	156.121	29.9438	68.3476	41.899	57.5016	89.8183	49.423	0.860828	0.0197092	0.999941	Cyyr1	16	85421533	85553397	protein_coding	cysteine and tyrosine-rich protein 1 [Source:MGI Symbol;Acc:MGI:2152187]
ENSMUSG00000051219	6.93408	1.94466	3.50022	3.9205	0.962875	4.94053	1.06942	0	0.974396	0	3.70048	0.510955	2.92589	0.0197231	0.999941	3100002H09Rik	4	124609931	124610803	protein_coding	RIKEN cDNA 3100002H09 gene [Source:MGI Symbol;Acc:MGI:1917499]
ENSMUSG00000041817	1142.14	1432.24	1255.41	1315.33	1356.69	1465.36	1005.26	1254.94	1077.68	1093.42	1327.86	1107.82	0.261283	0.0198922	0.999941	Fam169a	13	97067286	97131013	protein_coding	family with sequence similarity 169, member A [Source:MGI Symbol;Acc:MGI:2444268]
ENSMUSG00000040891	0.990583	0	0	0	0	0	6.41653	2.84782	0.974396	0.88464	0.165097	2.78085	-3.41282	0.0199636	0.999941	Foxa3	7	19013284	19023538	protein_coding	forkhead box A3 [Source:MGI Symbol;Acc:MGI:1347477]
ENSMUSG00000028518	760.768	946.079	828.385	887.014	914.731	1016.76	582.835	863.838	656.743	744.867	892.29	712.071	0.325071	0.0199874	0.999941	Prkaa2	4	105029874	105109890	protein_coding	protein kinase, AMP-activated, alpha 2 catalytic subunit [Source:MGI Symbol;Acc:MGI:1336173]
ENSMUSG00000028453	195.145	190.577	210.013	198.966	157.912	240.11	144.372	131	176.366	163.658	198.787	153.849	0.368414	0.0200184	0.999941	Fancg	4	43002343	43010506	protein_coding	Fanconi anemia, complementation group G [Source:MGI Symbol;Acc:MGI:1926471]
ENSMUSG00000023348	120.851	116.68	101.506	93.112	94.3618	78.0604	137.955	108.217	158.827	134.465	100.762	134.866	-0.420128	0.0201495	0.999941	Trip6	5	137309654	137314404	protein_coding	thyroid hormone receptor interactor 6 [Source:MGI Symbol;Acc:MGI:1343458]
ENSMUSG00000033268	3.96233	3.88933	1.16674	9.80126	7.703	3.95243	7.48596	17.0869	12.6672	11.5003	5.07918	12.1851	-1.2497	0.0201584	0.999941	Duox1	2	122315672	122347972	protein_coding	dual oxidase 1 [Source:MGI Symbol;Acc:MGI:2139422]
ENSMUSG00000060601	951.951	767.17	920.557	782.141	779.929	671.913	1119.69	828.715	1038.71	1073.95	812.277	1015.26	-0.322014	0.0201685	0.999941	Nr1h2	7	44549616	44553951	protein_coding	nuclear receptor subfamily 1, group H, member 2 [Source:MGI Symbol;Acc:MGI:1352463]
ENSMUSG00000030966	40.6139	50.5613	43.1693	48.0262	55.8468	46.441	32.0827	30.3767	34.1039	36.2702	47.4431	33.2084	0.515008	0.0201779	0.999941	Trim21	7	102557921	102565486	protein_coding	tripartite motif-containing 21 [Source:MGI Symbol;Acc:MGI:106657]
ENSMUSG00000058183	32.6893	37.9209	28.0017	37.2448	36.5893	26.6789	43.8463	57.9056	40.9246	50.4245	33.1875	48.2753	-0.539482	0.0201968	0.999941	Mmel1	4	154869585	154895528	protein_coding	membrane metallo-endopeptidase-like 1 [Source:MGI Symbol;Acc:MGI:1351603]
ENSMUSG00000038187	1154.03	1419.6	1365.08	1249.66	1322.03	1258.85	1229.84	1024.26	1099.12	1038.57	1294.88	1097.95	0.238372	0.0202518	0.999941	Btbd10	7	113315626	113369392	protein_coding	BTB (POZ) domain containing 10 [Source:MGI Symbol;Acc:MGI:1916065]
ENSMUSG00000070713	193.164	156.545	194.845	164.661	95.3246	104.739	304.785	193.652	219.239	177.813	151.547	223.872	-0.562922	0.020288	0.999941	Gm10282	8	72304110	72305260	protein_coding	predicted pseudogene 10282 [Source:MGI Symbol;Acc:MGI:3704312]
ENSMUSG00000033219	0	0.972332	0	4.90063	0	1.97621	11.7636	2.84782	3.89758	7.07712	1.3082	6.39654	-2.26438	0.0203673	0.999941	Gm9758	5	14910122	14914899	protein_coding	predicted gene 9758 [Source:MGI Symbol;Acc:MGI:3704245]
ENSMUSG00000040339	1038.13	1049.15	1199.41	955.623	1109.23	1088.89	875.857	1028.06	802.902	890.833	1073.41	899.413	0.254649	0.0205134	0.999941	Fam102b	3	108970997	109027607	protein_coding	family with sequence similarity 102, member B [Source:MGI Symbol;Acc:MGI:3036259]
ENSMUSG00000031481	0	0	0	0.980126	0.962875	0	5.34711	2.84782	0.974396	2.65392	0.323834	2.95581	-3.02516	0.0207123	0.999941	Tpte	8	22283441	22371418	protein_coding	transmembrane phosphatase with tensin homology [Source:MGI Symbol;Acc:MGI:2446460]
ENSMUSG00000025586	1156.01	1381.68	1081.57	1379.04	1249.81	1392.24	1064.08	1135.33	943.216	1089.88	1273.39	1058.12	0.26743	0.0207199	0.999941	Cpeb1	7	81347026	81455465	protein_coding	cytoplasmic polyadenylation element binding protein 1 [Source:MGI Symbol;Acc:MGI:108442]
ENSMUSG00000031099	741.947	799.257	768.881	627.281	794.372	713.413	663.042	544.882	641.153	624.556	740.858	618.408	0.260882	0.0207925	0.999941	Smarca1	X	47809368	47892974	protein_coding	SWI/SNF related, matrix associated, actin dependent regulator of chromatin, subfamily a, member 1 [Source:MGI Symbol;Acc:MGI:1935127]
ENSMUSG00000040584	504.207	495.889	297.518	508.685	626.832	775.664	339.007	454.701	342.987	354.741	534.799	372.859	0.52084	0.0208216	0.999941	Abcb1a	5	8660077	8748575	protein_coding	ATP-binding cassette, sub-family B (MDR/TAP), member 1A [Source:MGI Symbol;Acc:MGI:97570]
ENSMUSG00000049721	279.345	272.253	253.182	195.045	190.649	185.764	312.271	259.151	314.73	310.509	229.373	299.165	-0.383778	0.0208687	0.999941	Gal3st1	11	3983636	3999326	protein_coding	galactose-3-O-sulfotransferase 1 [Source:MGI Symbol;Acc:MGI:1858277]
ENSMUSG00000035601	260.523	253.779	316.186	262.674	245.533	285.563	226.718	223.079	197.802	236.199	270.71	220.949	0.291053	0.021246	0.999941	Trmt10b	4	45297127	45316131	protein_coding	tRNA methyltransferase 10B [Source:MGI Symbol;Acc:MGI:1917184]
ENSMUSG00000041309	281.326	282.949	417.693	372.448	227.239	237.146	577.488	307.564	442.376	396.319	303.133	430.937	-0.507835	0.0215301	0.999941	Nkx6-2	7	139579376	139582797	protein_coding	NK6 homeobox 2 [Source:MGI Symbol;Acc:MGI:1352738]
ENSMUSG00000042109	2252.59	2022.45	2161.97	2311.14	2149.14	2033.52	2432.94	2270.66	2565.59	2638	2155.13	2476.79	-0.200801	0.0217621	0.999941	Csdc2	15	81936759	81950941	protein_coding	cold shock domain containing C2, RNA binding [Source:MGI Symbol;Acc:MGI:2146027]
ENSMUSG00000028655	441.8	310.174	379.19	381.269	267.679	301.373	299.438	261.999	254.317	255.661	346.914	267.854	0.373273	0.021776	0.999941	Mfsd2a	4	122946850	122961188	protein_coding	major facilitator superfamily domain containing 2A [Source:MGI Symbol;Acc:MGI:1923824]
ENSMUSG00000049872	110.945	103.067	114.34	103.893	101.102	91.8939	91.9703	85.4345	78.9261	62.8094	104.207	79.7851	0.388198	0.0219615	0.999941	Calhm5	10	34087815	34096519	protein_coding	calcium homeostasis modulator family member 5 [Source:MGI Symbol;Acc:MGI:2143897]
ENSMUSG00000041423	225.853	168.213	250.849	285.217	243.607	264.813	257.731	264.847	415.093	361.818	239.759	324.872	-0.439203	0.0221687	0.999941	Paqr6	3	88364584	88368541	protein_coding	progestin and adipoQ receptor family member VI [Source:MGI Symbol;Acc:MGI:1916207]
ENSMUSG00000044716	304.109	280.032	217.013	270.515	211.833	224.3	347.562	300.919	289.396	332.625	251.3	317.625	-0.336834	0.0224907	0.999941	Dok7	5	35056766	35087839	protein_coding	docking protein 7 [Source:MGI Symbol;Acc:MGI:3584043]
ENSMUSG00000035310	211.985	290.727	232.181	299.919	255.162	281.61	199.982	243.014	202.674	177.813	261.931	205.871	0.348567	0.0224934	0.999941	Lin54	5	100441918	100500639	protein_coding	lin-54 homolog (C. elegans) [Source:MGI Symbol;Acc:MGI:2140902]
ENSMUSG00000044243	21.7928	14.585	23.3348	23.523	14.4431	11.8573	47.0546	25.6303	34.1039	19.4621	18.256	31.5627	-0.786855	0.0225252	0.999941	Bhlha9	11	76672470	76673676	protein_coding	basic helix-loop-helix family, member a9 [Source:MGI Symbol;Acc:MGI:2444198]
ENSMUSG00000058806	16.8399	13.6126	17.5011	6.86088	15.406	17.7859	32.0827	17.0869	28.2575	23.8853	14.6677	25.3281	-0.787678	0.0226057	0.999941	Col13a1	10	61838236	61979108	protein_coding	collagen, type XIII, alpha 1 [Source:MGI Symbol;Acc:MGI:1277201]
ENSMUSG00000035606	47.548	53.4783	40.8359	45.0858	50.0695	65.2151	58.8182	74.0432	67.2333	77.8483	50.3721	69.4858	-0.464171	0.0226272	0.999941	Ky	9	102505750	102546239	protein_coding	kyphoscoliosis peptidase [Source:MGI Symbol;Acc:MGI:96709]
ENSMUSG00000036815	2822.17	3336.07	3139.69	2811.98	3033.06	3186.64	2441.49	2788.96	2695.18	2661	3054.94	2646.66	0.206805	0.0227081	0.999941	Dpp10	1	123321471	124045559	protein_coding	dipeptidylpeptidase 10 [Source:MGI Symbol;Acc:MGI:2442409]
ENSMUSG00000074738	541.849	623.265	617.205	825.266	580.614	510.851	890.829	634.114	921.779	760.79	616.508	801.878	-0.378956	0.02278	0.999941	Fndc10	4	155694342	155696481	protein_coding	fibronectin type III domain containing 10 [Source:MGI Symbol;Acc:MGI:2444790]
ENSMUSG00000031700	1320.45	1109.43	999.895	1052.66	1167	1129.41	842.705	1073.63	815.57	979.297	1129.81	927.799	0.284049	0.0228992	0.999941	Gpt2	8	85492576	85527560	protein_coding	glutamic pyruvate transaminase (alanine aminotransferase) 2 [Source:MGI Symbol;Acc:MGI:1915391]
ENSMUSG00000029394	820.203	667.992	582.203	669.426	726.971	574.09	935.744	637.911	992.91	895.256	673.481	865.455	-0.361353	0.0229384	0.999941	Cdk2ap1	5	124345417	124363082	protein_coding	CDK2 (cyclin-dependent kinase 2)-associated protein 1 [Source:MGI Symbol;Acc:MGI:1202069]
ENSMUSG00000004056	1650.31	1352.51	1318.41	1331.99	1599.34	1189.68	1568.84	1665.97	1744.17	1844.47	1407.04	1705.86	-0.277885	0.0230409	0.999941	Akt2	7	27591552	27640826	protein_coding	thymoma viral proto-oncogene 2 [Source:MGI Symbol;Acc:MGI:104874]
ENSMUSG00000037406	31.6987	17.502	80.505	8.82114	12.5174	6.91675	9.6248	10.442	12.6672	6.19248	26.3268	9.73161	1.42963	0.0231501	0.999941	Htra4	8	25024929	25038962	protein_coding	HtrA serine peptidase 4 [Source:MGI Symbol;Acc:MGI:3036260]
ENSMUSG00000027215	358.591	263.502	311.519	254.833	256.125	223.312	379.645	304.716	438.478	328.201	277.98	362.76	-0.384171	0.023216	0.999941	Cd82	2	93419111	93463140	protein_coding	CD82 antigen [Source:MGI Symbol;Acc:MGI:104651]
ENSMUSG00000020834	156.512	123.486	177.344	169.562	159.837	125.49	183.941	160.427	247.497	208.775	152.039	200.16	-0.398343	0.0232378	0.999941	Dhrs13	11	78032280	78037866	protein_coding	dehydrogenase/reductase (SDR family) member 13 [Source:MGI Symbol;Acc:MGI:1917701]
ENSMUSG00000040102	599.303	587.289	535.533	612.579	600.834	573.102	440.602	542.984	450.171	536.977	584.773	492.683	0.246601	0.0232397	0.999941	Klhl42	6	147091379	147112778	protein_coding	kelch-like 42 [Source:MGI Symbol;Acc:MGI:2444786]
ENSMUSG00000030431	72.3126	53.4783	78.1715	69.589	64.5126	51.3816	108.012	52.21	108.158	111.465	64.9076	94.9611	-0.550452	0.023469	0.999941	Tmem238	7	4784557	4789656	protein_coding	transmembrane protein 238 [Source:MGI Symbol;Acc:MGI:1922935]
ENSMUSG00000032724	259.533	277.115	236.848	251.892	297.528	290.503	297.299	369.267	297.191	351.202	268.903	328.74	-0.289851	0.0236721	0.999941	Abtb2	2	103566310	103718423	protein_coding	ankyrin repeat and BTB (POZ) domain containing 2 [Source:MGI Symbol;Acc:MGI:2139365]
ENSMUSG00000054976	713.22	859.541	662.708	786.061	818.444	862.617	601.015	737.584	616.793	640.479	783.765	648.968	0.272527	0.0237417	0.999941	Nyap2	1	81076950	81341764	protein_coding	neuronal tyrosine-phophorylated phosphoinositide 3-kinase adaptor 2 [Source:MGI Symbol;Acc:MGI:2443135]
ENSMUSG00000022414	405.149	438.522	389.691	451.838	412.111	329.04	619.195	402.491	514.481	505.129	404.392	510.324	-0.334705	0.0237903	0.999941	Tab1	15	80133127	80161707	protein_coding	TGF-beta activated kinase 1/MAP3K7 binding protein 1 [Source:MGI Symbol;Acc:MGI:1913763]
ENSMUSG00000046160	2619.1	2284.98	2705.67	1988.68	2086.55	1523.66	3415.73	2141.56	3143.4	3074.12	2201.44	2943.7	-0.419248	0.023815	0.999941	Olig1	16	91269772	91271933	protein_coding	oligodendrocyte transcription factor 1 [Source:MGI Symbol;Acc:MGI:1355334]
ENSMUSG00000028780	473.499	486.166	501.698	418.514	520.915	577.054	386.061	469.89	356.629	405.165	496.308	404.436	0.294887	0.0239364	0.999941	Sema3c	5	17574281	17730268	protein_coding	sema domain, immunoglobulin domain (Ig), short basic domain, secreted, (semaphorin) 3C [Source:MGI Symbol;Acc:MGI:107557]
ENSMUSG00000047040	0	2.917	1.16674	0.980126	1.92575	1.97621	4.27769	9.49272	0.974396	8.8464	1.4943	5.8978	-1.98046	0.0239398	0.999941	Prr15l	11	96928104	96937830	protein_coding	proline rich 15-like [Source:MGI Symbol;Acc:MGI:2387599]
ENSMUSG00000051550	381.375	277.115	271.85	268.555	267.679	222.324	357.187	300.919	393.656	408.704	281.483	365.117	-0.375486	0.0244054	0.999941	Zfp579	7	4983483	4996158	protein_coding	zinc finger protein 579 [Source:MGI Symbol;Acc:MGI:1915740]
ENSMUSG00000024906	341.751	298.506	355.855	372.448	321.6	236.158	395.686	346.484	452.12	437.012	321.053	407.826	-0.345835	0.0245178	0.999941	Mus81	19	5482345	5488402	protein_coding	MUS81 structure-specific endonuclease subunit [Source:MGI Symbol;Acc:MGI:1918961]
ENSMUSG00000024650	143.635	132.237	93.3391	99.9729	134.803	133.394	170.038	142.391	155.903	171.62	122.897	159.988	-0.377876	0.0245527	0.999941	Slc22a6	19	8617996	8628299	protein_coding	solute carrier family 22 (organic anion transporter), member 6 [Source:MGI Symbol;Acc:MGI:892001]
ENSMUSG00000022288	0.990583	0	1.16674	0	0.962875	0	0	8.54345	1.94879	5.30784	0.520033	3.95002	-2.97926	0.0245698	0.999941	4930447A16Rik	15	37425554	37440644	protein_coding	RIKEN cDNA 4930447A16 gene [Source:MGI Symbol;Acc:MGI:1922142]
ENSMUSG00000021606	590.388	322.814	463.195	323.442	268.642	217.384	851.26	245.861	739.567	589.17	364.311	606.465	-0.735299	0.0246451	0.999941	Ndufs6	13	73319838	73328542	protein_coding	NADH:ubiquinone oxidoreductase core subunit S6 [Source:MGI Symbol;Acc:MGI:107932]
ENSMUSG00000078768	53.4915	81.6759	81.6717	99.9729	62.5869	76.0842	57.7488	51.2607	58.4638	49.5398	75.9138	54.2533	0.485672	0.0246544	0.999941	Zfp566	7	30077337	30090527	protein_coding	zinc finger protein 566 [Source:MGI Symbol;Acc:MGI:1919806]
ENSMUSG00000029840	5253.06	5860.24	6040.21	4975.12	5321.81	5591.7	4655.2	5102.34	4769.67	4645.25	5507.02	4793.11	0.200213	0.0247453	0.999941	Mtpn	6	35508906	35539888	protein_coding	myotrophin [Source:MGI Symbol;Acc:MGI:99445]
ENSMUSG00000025198	468.546	446.3	477.196	380.289	424.628	451.565	355.048	328.448	412.17	374.203	441.421	367.467	0.263844	0.0247728	0.999941	Erlin1	19	44034944	44069785	protein_coding	ER lipid raft associated 1 [Source:MGI Symbol;Acc:MGI:2387613]
ENSMUSG00000028454	502.226	424.909	387.357	491.043	530.544	448.601	502.628	572.411	570.022	608.632	464.113	563.423	-0.279484	0.0248985	0.999941	Pigo	4	43017635	43025819	protein_coding	phosphatidylinositol glycan anchor biosynthesis, class O [Source:MGI Symbol;Acc:MGI:1861452]
ENSMUSG00000026418	63.3973	79.7312	38.5024	91.1517	68.3641	61.2626	116.567	80.6881	112.056	81.3869	67.0682	97.6744	-0.536002	0.0249117	0.999941	Tnni1	1	135779434	135810989	protein_coding	troponin I, skeletal, slow 1 [Source:MGI Symbol;Acc:MGI:105073]
ENSMUSG00000020331	4197.1	3308.85	3335.71	3058.97	3052.31	2468.29	4809.19	3686.02	3811.84	4111.81	3236.87	4104.72	-0.342642	0.0249601	0.999941	Hcn2	10	79716634	79736108	protein_coding	hyperpolarization-activated, cyclic nucleotide-gated K+ 2 [Source:MGI Symbol;Acc:MGI:1298210]
ENSMUSG00000037761	157.503	135.154	119.007	138.198	152.134	131.418	203.19	152.833	165.647	178.697	138.902	175.092	-0.330942	0.0251131	0.999941	Actr5	2	158624888	158639211	protein_coding	ARP5 actin-related protein 5 [Source:MGI Symbol;Acc:MGI:1924748]
ENSMUSG00000017057	159.484	117.652	163.343	125.456	141.543	172.919	110.15	129.101	93.542	115.888	146.733	112.17	0.385473	0.0251715	0.999941	Il13ra1	X	36112110	36171259	protein_coding	interleukin 13 receptor, alpha 1 [Source:MGI Symbol;Acc:MGI:105052]
ENSMUSG00000050087	0	0.972332	0	2.94038	2.88863	1.97621	9.6248	4.74636	2.92319	5.30784	1.46292	5.65055	-1.91474	0.0252334	0.999941	Cby3	11	50354462	50359699	protein_coding	chibby family member 3 [Source:MGI Symbol;Acc:MGI:1923903]
ENSMUSG00000030720	197.126	222.664	226.347	214.648	233.979	216.395	266.286	244.912	262.113	268.046	218.527	260.339	-0.252781	0.0252632	0.999941	Cln3	7	126571207	126585817	protein_coding	ceroid lipofuscinosis, neuronal 3, juvenile (Batten, Spielmeyer-Vogt disease) [Source:MGI Symbol;Acc:MGI:107537]
ENSMUSG00000034918	27.7363	14.585	35.0022	16.6621	10.5916	9.88107	14.9719	6.6449	6.82077	7.96176	19.0764	9.09984	1.06982	0.0252817	0.999941	Cdhr2	13	54701461	54736662	protein_coding	cadherin-related family member 2 [Source:MGI Symbol;Acc:MGI:2687323]
ENSMUSG00000061048	7.92467	7.77866	5.83369	15.682	17.3318	7.90486	18.1802	11.3913	21.4367	30.9624	10.4093	20.4926	-0.972754	0.025356	0.999941	Cdh3	8	106510891	106557297	protein_coding	cadherin 3 [Source:MGI Symbol;Acc:MGI:88356]
ENSMUSG00000032298	142.644	152.656	152.843	159.761	173.318	137.347	207.468	166.123	202.674	182.236	153.095	189.625	-0.307053	0.0253992	0.999941	Neil1	9	57142800	57148305	protein_coding	nei endonuclease VIII-like 1 (E. coli) [Source:MGI Symbol;Acc:MGI:1920024]
ENSMUSG00000001930	326.893	316.98	374.523	345.985	364.93	378.445	213.884	326.55	286.472	300.778	351.293	281.921	0.315216	0.025449	0.999941	Vwf	6	125546774	125686679	protein_coding	Von Willebrand factor [Source:MGI Symbol;Acc:MGI:98941]
ENSMUSG00000039759	215.947	146.822	187.845	196.025	126.137	134.383	353.979	147.137	291.344	200.813	167.86	248.318	-0.56413	0.0254554	0.999941	Thap3	4	151982639	151988997	protein_coding	THAP domain containing, apoptosis associated protein 3 [Source:MGI Symbol;Acc:MGI:1917126]
ENSMUSG00000031775	134.719	175.992	114.34	115.655	114.582	104.739	219.232	139.543	164.673	162.774	126.671	171.555	-0.435016	0.0257601	0.999941	Pllp	8	94674894	94696278	protein_coding	plasma membrane proteolipid [Source:MGI Symbol;Acc:MGI:1915051]
ENSMUSG00000039377	10.8964	9.72332	14.0009	14.7019	6.74013	6.91675	34.2215	8.54345	22.4111	17.6928	10.4966	20.7172	-0.979097	0.025862	0.999941	Hlx	1	184727140	184732619	protein_coding	H2.0-like homeobox [Source:MGI Symbol;Acc:MGI:96109]
ENSMUSG00000066319	0	0	0	0	0	1.97621	1.06942	3.79709	1.94879	5.30784	0.329369	3.03079	-3.07969	0.0260347	0.999941	Rtp3	9	110984935	110990583	protein_coding	receptor transporter protein 3 [Source:MGI Symbol;Acc:MGI:2446841]
ENSMUSG00000020020	0	0	0	0	0	0	4.27769	3.79709	0	2.65392	0	2.68217	-3.8526	0.0261806	0.999941	Usp44	10	93831555	93858088	protein_coding	ubiquitin specific peptidase 44 [Source:MGI Symbol;Acc:MGI:3045318]
ENSMUSG00000043051	21.7928	15.5573	18.6678	23.523	22.1461	16.7978	23.5273	45.5651	26.3087	30.0778	19.7475	31.3697	-0.670252	0.0263473	0.999941	Disc1	8	125054195	125261858	protein_coding	disrupted in schizophrenia 1 [Source:MGI Symbol;Acc:MGI:2447658]
ENSMUSG00000037253	763.74	700.079	774.715	748.816	726.971	853.724	550.752	678.73	663.564	682.058	761.341	643.776	0.241018	0.0263633	0.999941	Mex3c	18	73573044	73592575	protein_coding	mex3 RNA binding family member C [Source:MGI Symbol;Acc:MGI:2652843]
ENSMUSG00000040901	1.98117	0.972332	0	2.94038	9.62875	0	0	0	0	0	2.5871	0	3.87073	0.0263775	0.999941	Kcnk18	19	59219648	59237370	protein_coding	potassium channel, subfamily K, member 18 [Source:MGI Symbol;Acc:MGI:2685627]
ENSMUSG00000028098	1038.13	1034.56	1230.91	1230.06	1061.09	1078.02	936.814	919.845	1030.91	920.026	1112.13	951.899	0.224148	0.026502	0.999941	Rnf115	3	96727664	96791638	protein_coding	ring finger protein 115 [Source:MGI Symbol;Acc:MGI:1915095]
ENSMUSG00000093661	207.032	227.526	214.68	206.807	254.199	218.372	135.817	178.463	200.726	191.082	221.436	176.522	0.325085	0.0266058	0.999941	Eif4e3	6	99625135	99666771	protein_coding	eukaryotic translation initiation factor 4E member 3 [Source:MGI Symbol;Acc:MGI:1914142]
ENSMUSG00000030495	518.075	389.905	420.026	445.957	507.435	448.601	529.364	525.897	561.252	558.208	455	543.68	-0.256611	0.0266141	0.999941	Slc7a10	7	35186385	35201114	protein_coding	solute carrier family 7 (cationic amino acid transporter, y+ system), member 10 [Source:MGI Symbol;Acc:MGI:1858261]
ENSMUSG00000027002	9979.14	10896	11866.9	9992.39	11095.2	11822.7	9393.81	10165.8	9247.02	9258.64	10942	9516.31	0.201372	0.0266286	0.999941	Nckap1	2	80500512	80581380	protein_coding	NCK-associated protein 1 [Source:MGI Symbol;Acc:MGI:1355333]
ENSMUSG00000081225	40.6139	71.9526	59.5037	47.0461	68.3641	69.1675	74.8596	80.6881	86.7213	84.9254	59.4413	81.7986	-0.461151	0.0267884	0.999941	Cyp2j12	4	96099318	96141152	protein_coding	cytochrome P450, family 2, subfamily j, polypeptide 12 [Source:MGI Symbol;Acc:MGI:3717097]
ENSMUSG00000028035	1359.08	1381.68	1568.1	1432.94	1298.92	1419.91	1132.52	1227.41	1298.87	1240.27	1410.11	1224.77	0.202658	0.026924	0.999941	Dnajb4	3	152178511	152210302	protein_coding	DnaJ heat shock protein family (Hsp40) member B4 [Source:MGI Symbol;Acc:MGI:1914285]
ENSMUSG00000021474	1033.18	1109.43	1363.92	1085.98	1022.57	1154.11	1030.92	937.881	924.702	899.679	1128.2	948.296	0.250371	0.0269366	0.999941	Sfxn1	13	54071869	54108342	protein_coding	sideroflexin 1 [Source:MGI Symbol;Acc:MGI:2137677]
ENSMUSG00000040428	42.5951	36.9486	78.1715	60.7678	98.2133	50.3935	39.5686	27.5289	38.9758	46.8859	61.1816	38.2398	0.675658	0.0271968	0.999941	Plekha4	7	45526330	45554229	protein_coding	pleckstrin homology domain containing, family A (phosphoinositide binding specific) member 4 [Source:MGI Symbol;Acc:MGI:1916467]
ENSMUSG00000078796	4.95292	14.585	11.6674	5.88076	5.77725	7.90486	18.1802	13.2898	20.4623	13.2696	8.46136	16.3005	-0.949211	0.0274626	0.999941	Zfp541	7	16061814	16096334	protein_coding	zinc finger protein 541 [Source:MGI Symbol;Acc:MGI:3647699]
ENSMUSG00000057561	914.308	848.846	1023.23	823.306	804.001	946.606	730.415	667.338	876.957	685.596	893.383	740.077	0.271363	0.0277563	0.999941	Eif1a	18	46597704	46610225	protein_coding	eukaryotic translation initiation factor 1A [Source:MGI Symbol;Acc:MGI:95298]
ENSMUSG00000037316	980.678	1122.07	1351.08	1230.06	1076.49	1196.6	936.814	889.468	1068.91	975.758	1159.5	967.738	0.260374	0.0278405	0.999941	Bag4	8	25764538	25785287	protein_coding	BCL2-associated athanogene 4 [Source:MGI Symbol;Acc:MGI:1914634]
ENSMUSG00000068008	0	4.86166	9.33391	0.980126	0	0.988107	0	0	0	0	2.69397	0	3.90532	0.0278756	0.999941	Bpifb3	2	153918230	153932996	protein_coding	BPI fold containing family B, member 3 [Source:MGI Symbol;Acc:MGI:2675077]
ENSMUSG00000022299	342.742	366.569	361.689	368.527	435.22	418.957	307.994	348.383	317.653	303.432	382.284	319.365	0.25985	0.0279226	0.999941	Slc25a32	15	39091231	39112716	protein_coding	solute carrier family 25, member 32 [Source:MGI Symbol;Acc:MGI:1917156]
ENSMUSG00000003617	298.166	258.64	344.188	358.726	416.925	487.137	257.731	312.311	260.164	260.084	360.63	272.572	0.403862	0.0279394	0.999941	Cp	3	19957054	20009145	protein_coding	ceruloplasmin [Source:MGI Symbol;Acc:MGI:88476]
ENSMUSG00000099655	11.887	17.502	12.8341	15.682	9.62875	8.89296	28.8744	29.4274	21.4367	11.5003	12.7378	22.8097	-0.833888	0.027959	0.999941	2310034G01Rik	19	46348201	46350302	protein_coding	RIKEN cDNA 2310034G01 gene [Source:MGI Symbol;Acc:MGI:1922829]
ENSMUSG00000040435	169.39	180.854	147.009	193.085	178.132	161.061	301.577	186.057	206.572	197.275	171.588	222.87	-0.373752	0.0279726	0.999941	Ppp1r15a	7	45522916	45526268	protein_coding	protein phosphatase 1, regulatory subunit 15A [Source:MGI Symbol;Acc:MGI:1927072]
ENSMUSG00000031278	1424.46	1572.26	1552.93	1449.61	1642.66	1610.61	1271.54	1466.63	1353.44	1276.54	1542.09	1342.04	0.20039	0.0280383	0.999941	Acsl4	X	142317993	142390535	protein_coding	acyl-CoA synthetase long-chain family member 4 [Source:MGI Symbol;Acc:MGI:1354713]
ENSMUSG00000026307	239.721	176.964	198.346	183.284	197.389	166.002	229.926	233.521	229.958	265.392	193.618	239.699	-0.309205	0.0280516	0.999941	Scly	1	91298338	91321075	protein_coding	selenocysteine lyase [Source:MGI Symbol;Acc:MGI:1355310]
ENSMUSG00000079598	874.685	752.585	870.387	993.848	816.518	799.378	1023.44	823.019	1209.23	1139.42	851.234	1048.77	-0.301224	0.0280656	0.999941	Clec2l	6	38663069	38680864	protein_coding	C-type lectin domain family 2, member L [Source:MGI Symbol;Acc:MGI:2141402]
ENSMUSG00000040938	386.328	414.213	317.353	591.996	557.505	512.827	568.933	501.216	791.21	655.518	463.37	629.219	-0.440806	0.0280791	0.999941	Slc16a11	11	70212752	70216417	protein_coding	solute carrier family 16 (monocarboxylic acid transporters), member 11 [Source:MGI Symbol;Acc:MGI:2663709]
ENSMUSG00000005034	8617.08	9789.44	8873.05	8830.94	8609.07	9319.82	8100.87	8362.14	7750.35	7907.8	9006.57	8030.29	0.165545	0.0282789	0.999941	Prkacb	3	146729574	146812990	protein_coding	protein kinase, cAMP dependent, catalytic, beta [Source:MGI Symbol;Acc:MGI:97594]
ENSMUSG00000078157	3.96233	12.6403	14.0009	7.84101	4.81438	3.95243	19.2496	17.0869	15.5903	11.5003	7.86855	15.8568	-1.02042	0.028359	0.999941	4931440F15Rik	11	29822395	29825668	protein_coding	RIKEN cDNA 4931440F15 gene [Source:MGI Symbol;Acc:MGI:2441689]
ENSMUSG00000031703	3774.12	4026.43	4179.26	4068.5	3886.16	4544.3	3538.72	3718.3	3522.44	3609.33	4079.8	3597.2	0.181548	0.0283638	0.999941	Itfg1	8	85717578	85840921	protein_coding	integrin alpha FG-GAP repeat containing 1 [Source:MGI Symbol;Acc:MGI:106419]
ENSMUSG00000025038	37.6422	43.7549	47.8363	31.364	27.9234	52.3697	22.4579	19.9347	37.0271	23.8853	40.1484	25.8262	0.63386	0.0285302	0.999941	Efhc2	X	17132049	17319368	protein_coding	EF-hand domain (C-terminal) containing 2 [Source:MGI Symbol;Acc:MGI:1921655]
ENSMUSG00000031681	503.216	538.672	588.036	543.97	483.363	493.065	461.99	428.122	461.864	446.743	525.054	449.68	0.222998	0.0286736	0.999941	Smad1	8	79338395	79399518	protein_coding	SMAD family member 1 [Source:MGI Symbol;Acc:MGI:109452]
ENSMUSG00000036282	931.148	1029.7	955.559	1093.82	1014.87	1142.25	867.301	889.468	936.395	858.101	1027.89	887.816	0.211665	0.0289322	0.999941	Naa30	14	49172226	49191031	protein_coding	N(alpha)-acetyltransferase 30, NatC catalytic subunit [Source:MGI Symbol;Acc:MGI:1922259]
ENSMUSG00000034738	79.2467	38.8933	64.1706	40.1852	49.1066	72.1318	22.4579	42.7172	48.7198	31.847	57.289	36.4355	0.648824	0.0289895	0.999941	Nostrin	2	69135800	69189330	protein_coding	nitric oxide synthase trafficker [Source:MGI Symbol;Acc:MGI:3606242]
ENSMUSG00000001518	331.845	379.209	392.024	433.216	383.224	382.397	450.227	484.129	432.632	444.089	383.653	452.769	-0.239123	0.0290042	0.999941	Itfg2	6	128409444	128424931	protein_coding	integrin alpha FG-GAP repeat containing 2 [Source:MGI Symbol;Acc:MGI:1915450]
ENSMUSG00000040396	781.57	773.976	814.384	809.584	873.328	899.177	680.153	755.621	723.002	712.135	825.337	717.728	0.201348	0.0290072	0.999941	Abhd13	8	9977707	9992155	protein_coding	abhydrolase domain containing 13 [Source:MGI Symbol;Acc:MGI:1916154]
ENSMUSG00000051950	352.648	481.304	378.023	370.488	337.006	349.79	294.091	340.789	266.01	319.355	378.21	305.061	0.3096	0.0290406	0.999941	B3glct	5	149678230	149762599	protein_coding	beta-3-glucosyltransferase [Source:MGI Symbol;Acc:MGI:2685903]
ENSMUSG00000023909	942.045	869.265	918.224	766.459	834.813	796.414	1037.34	920.794	985.115	1035.91	854.536	994.79	-0.21953	0.0291431	0.999941	Paqr4	17	23736186	23740867	protein_coding	progestin and adipoQ receptor family member IV [Source:MGI Symbol;Acc:MGI:1923748]
ENSMUSG00000021179	314.015	317.953	315.019	325.402	297.528	220.348	418.144	345.535	371.245	344.125	298.378	369.762	-0.308875	0.0291624	0.999941	Nrde2	12	100125452	100159653	protein_coding	nrde-2 necessary for RNA interference, domain containing [Source:MGI Symbol;Acc:MGI:2670969]
ENSMUSG00000023781	7.92467	6.80632	8.16717	2.94038	2.88863	1.97621	22.4579	8.54345	6.82077	10.6157	5.11723	12.1094	-1.24559	0.0292693	0.999941	Hes7	11	69120404	69124055	protein_coding	hes family bHLH transcription factor 7 [Source:MGI Symbol;Acc:MGI:2135679]
ENSMUSG00000047216	253.589	311.146	247.349	331.283	301.38	309.277	216.023	286.68	233.855	185.774	292.337	230.583	0.343532	0.0292753	0.999941	Cdh19	1	110888326	110977584	protein_coding	cadherin 19, type 2 [Source:MGI Symbol;Acc:MGI:3588198]
ENSMUSG00000025991	1.98117	13.6126	2.33348	6.86088	8.66588	9.88107	10.6942	23.7318	11.6928	17.6928	7.22252	15.9529	-1.13506	0.0293548	0.999941	Cps1	1	67123026	67231259	protein_coding	carbamoyl-phosphate synthetase 1 [Source:MGI Symbol;Acc:MGI:891996]
ENSMUSG00000042742	636.945	703.968	649.874	761.558	694.233	787.521	481.24	634.114	583.663	643.133	705.683	585.538	0.268572	0.0293766	0.999941	Bmt2	6	13625673	13677966	protein_coding	base methyltransferase of 25S rRNA 2 [Source:MGI Symbol;Acc:MGI:2141466]
ENSMUSG00000029798	157.503	212.941	228.681	168.582	213.758	187.74	174.316	153.782	154.929	129.157	194.867	153.046	0.349497	0.0294077	0.999941	Herc6	6	57581000	57664632	protein_coding	hect domain and RLD 6 [Source:MGI Symbol;Acc:MGI:1914388]
ENSMUSG00000022217	383.356	246	375.69	269.535	263.828	267.777	441.671	299.021	494.993	373.318	301.031	402.251	-0.418664	0.0294836	0.999941	Emc9	14	55581516	55585302	protein_coding	ER membrane protein complex subunit 9 [Source:MGI Symbol;Acc:MGI:1934682]
ENSMUSG00000047242	557.698	618.403	708.211	555.732	579.651	616.579	548.614	494.571	526.174	483.013	606.046	513.093	0.239956	0.0295599	0.999941	Taf9b	X	106206883	106221158	protein_coding	TATA-box binding protein associated factor 9B [Source:MGI Symbol;Acc:MGI:3039562]
ENSMUSG00000022280	669.634	662.158	607.871	629.241	701.936	759.854	521.878	639.809	504.737	588.286	671.782	563.678	0.252937	0.0295653	0.999941	Rnf19a	15	36239933	36283147	protein_coding	ring finger protein 19A [Source:MGI Symbol;Acc:MGI:1353623]
ENSMUSG00000078154	104.011	76.8142	63.0039	80.3703	86.6588	75.0961	129.4	71.1954	127.646	121.196	80.9924	112.359	-0.469222	0.0299552	0.999941	Gm12184	11	48825346	48826655	protein_coding	predicted gene 12184 [Source:MGI Symbol;Acc:MGI:3652174]
ENSMUSG00000025386	8.91525	3.88933	4.66696	3.9205	2.88863	3.95243	13.9025	5.69563	11.6928	10.6157	4.70552	10.4766	-1.15166	0.0300643	0.999941	Pde6g	11	120447605	120453500	protein_coding	phosphodiesterase 6G, cGMP-specific, rod, gamma [Source:MGI Symbol;Acc:MGI:97526]
ENSMUSG00000021509	1.98117	1.94466	3.50022	2.94038	8.66588	3.95243	11.7636	12.3405	4.87198	8.8464	3.83079	9.45564	-1.29651	0.0301377	0.999941	Slc25a48	13	56438355	56474239	protein_coding	solute carrier family 25, member 48 [Source:MGI Symbol;Acc:MGI:2145373]
ENSMUSG00000020380	246.655	344.206	351.188	275.415	312.934	392.278	256.661	304.716	206.572	220.275	320.446	247.056	0.375189	0.0301562	0.999941	Rad50	11	53649519	53707319	protein_coding	RAD50 double strand break repair protein [Source:MGI Symbol;Acc:MGI:109292]
ENSMUSG00000061878	83.209	52.5059	70.0043	85.271	62.5869	59.2864	111.22	66.449	98.414	105.272	68.8106	95.3388	-0.469921	0.0302299	0.999941	Sphk1	11	116530925	116536674	protein_coding	sphingosine kinase 1 [Source:MGI Symbol;Acc:MGI:1316649]
ENSMUSG00000063511	4377.39	3838.77	2904.01	4352.74	4303.09	3827.93	4539.7	4562.2	5080.5	5024.76	3933.99	4801.79	-0.287462	0.0303159	0.999941	Snrnp70	7	45376453	45395742	protein_coding	small nuclear ribonucleoprotein 70 (U1) [Source:MGI Symbol;Acc:MGI:98341]
ENSMUSG00000034059	1007.42	774.949	873.887	944.842	861.773	925.856	957.133	999.584	1199.48	1112.88	898.122	1067.27	-0.249178	0.0305075	0.999941	Ypel4	2	84734058	84738655	protein_coding	yippee like 4 [Source:MGI Symbol;Acc:MGI:3605071]
ENSMUSG00000074890	105.002	113.763	129.508	133.297	140.58	84.9772	150.789	139.543	155.903	161.889	117.854	152.031	-0.368362	0.0305865	0.999941	Lcmt2	2	121128307	121140653	protein_coding	leucine carboxyl methyltransferase 2 [Source:MGI Symbol;Acc:MGI:1353659]
ENSMUSG00000022865	571.567	624.237	525.032	749.797	662.458	736.14	516.531	521.15	551.508	536.977	644.872	531.542	0.279396	0.0306465	0.999941	Cxadr	16	78301489	78359774	protein_coding	coxsackie virus and adenovirus receptor [Source:MGI Symbol;Acc:MGI:1201679]
ENSMUSG00000013663	2827.12	3031.73	2627.5	2792.38	3111.05	3211.35	2286.42	2887.69	2388.25	2437.18	2933.52	2499.88	0.230792	0.0306605	0.999941	Pten	19	32757497	32826160	protein_coding	phosphatase and tensin homolog [Source:MGI Symbol;Acc:MGI:109583]
ENSMUSG00000025409	682.512	710.775	464.362	683.148	698.084	699.58	729.346	864.787	784.389	866.947	656.41	811.367	-0.305229	0.0307598	0.999941	Mbd6	10	127281956	127289018	protein_coding	methyl-CpG binding domain protein 6 [Source:MGI Symbol;Acc:MGI:106378]
ENSMUSG00000028869	786.523	884.822	953.226	959.544	937.84	1027.63	833.08	745.179	844.802	705.943	924.931	782.251	0.242134	0.0308878	0.999941	Gnl2	4	125016585	125055380	protein_coding	guanine nucleotide binding protein-like 2 (nucleolar) [Source:MGI Symbol;Acc:MGI:2385207]
ENSMUSG00000032803	1689.94	1600.46	1776.94	1643.67	1550.23	1735.12	1392.39	1411.57	1523.96	1542.81	1666.06	1467.68	0.182398	0.0311082	0.999941	Cdv3	9	103353094	103365840	protein_coding	carnitine deficiency-associated gene expressed in ventricle 3 [Source:MGI Symbol;Acc:MGI:2448759]
ENSMUSG00000033960	1904.89	1869.79	1534.26	1337.87	1948.86	1901.12	1256.57	1714.39	1168.3	1404.81	1749.47	1386.02	0.335939	0.0311476	0.999941	Jcad	18	4634929	4682868	protein_coding	junctional cadherin 5 associated [Source:MGI Symbol;Acc:MGI:2685174]
ENSMUSG00000021929	1594.84	1789.09	2004.46	1780.89	1727.4	1988.07	1520.72	1642.24	1569.75	1538.39	1814.12	1567.78	0.210265	0.0311526	0.999941	Kpna3	14	61365211	61439874	protein_coding	karyopherin (importin) alpha 3 [Source:MGI Symbol;Acc:MGI:1100863]
ENSMUSG00000078552	80.2373	76.8142	77.0048	66.6486	104.953	85.9653	88.762	101.572	113.03	129.157	81.9372	108.13	-0.401946	0.0312613	0.999941	Dcdc2b	4	129608331	129614257	protein_coding	doublecortin domain containing 2b [Source:MGI Symbol;Acc:MGI:2686212]
ENSMUSG00000061132	144.625	101.123	374.523	94.0921	85.6959	75.0961	90.9009	81.6374	83.7981	63.6941	145.859	80.0076	0.86442	0.0313089	0.999941	Blnk	19	40928927	40994535	protein_coding	B cell linker [Source:MGI Symbol;Acc:MGI:96878]
ENSMUSG00000040010	1092.61	1180.41	903.056	1043.83	977.318	1011.82	1063.01	785.997	737.618	799.715	1034.84	846.584	0.290568	0.0316264	0.999941	Slc7a5	8	121881150	121907694	protein_coding	solute carrier family 7 (cationic amino acid transporter, y+ system), member 5 [Source:MGI Symbol;Acc:MGI:1298205]
ENSMUSG00000045817	582.463	643.684	595.037	558.672	595.057	433.779	854.468	707.208	611.921	650.21	568.115	705.952	-0.31291	0.0316607	0.999941	Zfp36l2	17	84183931	84187947	protein_coding	zinc finger protein 36, C3H type-like 2 [Source:MGI Symbol;Acc:MGI:107945]
ENSMUSG00000043832	18.8211	17.502	29.1685	18.6224	18.2946	12.8454	9.6248	6.6449	14.6159	12.385	19.209	10.8177	0.817974	0.0317157	0.999941	Clec4a3	6	122952515	122969875	protein_coding	C-type lectin domain family 4, member a3 [Source:MGI Symbol;Acc:MGI:1920399]
ENSMUSG00000041598	802.373	718.553	569.369	969.345	796.298	664.996	859.815	786.947	1149.79	1108.45	753.489	976.251	-0.373443	0.0317277	0.999941	Cdc42ep4	11	113726850	113751881	protein_coding	CDC42 effector protein (Rho GTPase binding) 4 [Source:MGI Symbol;Acc:MGI:1929760]
ENSMUSG00000000957	318.968	303.368	366.356	319.521	383.224	281.61	355.048	396.796	417.042	421.089	328.841	397.494	-0.274935	0.0318007	0.999941	Mmp14	14	54431612	54445364	protein_coding	matrix metallopeptidase 14 (membrane-inserted) [Source:MGI Symbol;Acc:MGI:101900]
ENSMUSG00000060733	737.985	700.079	667.375	612.579	683.641	707.485	561.447	584.752	536.892	659.057	684.857	585.537	0.225416	0.0318612	0.999941	Ipmk	10	71347763	71433327	protein_coding	inositol polyphosphate multikinase [Source:MGI Symbol;Acc:MGI:1916968]
ENSMUSG00000036779	946.007	1031.64	862.22	1057.56	985.984	1081.98	793.511	933.134	812.646	862.524	994.231	850.454	0.225483	0.0320493	0.999941	Papd5	8	88199213	88259722	protein_coding	PAP associated domain containing 5 [Source:MGI Symbol;Acc:MGI:1917820]
ENSMUSG00000000202	560.67	435.605	549.534	374.408	414.036	300.385	730.415	448.056	631.409	559.093	439.106	592.243	-0.431743	0.0320507	0.999941	Btbd17	11	114791217	114795945	protein_coding	BTB (POZ) domain containing 17 [Source:MGI Symbol;Acc:MGI:1919264]
ENSMUSG00000000058	779.589	854.68	948.559	685.108	745.265	856.689	711.166	635.063	741.516	607.748	811.648	673.873	0.268304	0.0321403	0.999941	Cav2	6	17281185	17289115	protein_coding	caveolin 2 [Source:MGI Symbol;Acc:MGI:107571]
ENSMUSG00000034161	65.3785	47.6443	53.67	74.4896	27.9234	63.2388	81.2761	59.8041	106.209	83.1562	55.3908	82.6114	-0.576792	0.0322366	0.999941	Scx	15	76457452	76459458	protein_coding	scleraxis [Source:MGI Symbol;Acc:MGI:102934]
ENSMUSG00000024055	153.54	140.016	183.178	179.363	173.318	168.966	245.967	172.768	203.649	207.89	166.397	207.568	-0.318468	0.0322392	0.999941	Cyp4f13	17	32924688	32947402	protein_coding	cytochrome P450, family 4, subfamily f, polypeptide 13 [Source:MGI Symbol;Acc:MGI:2158641]
ENSMUSG00000028629	90.1431	119.597	112.007	112.715	82.8073	92.882	122.984	107.268	163.699	138.888	101.692	133.21	-0.391021	0.0322433	0.999941	Exo5	4	120921196	120925017	protein_coding	exonuclease 5 [Source:MGI Symbol;Acc:MGI:1920422]
ENSMUSG00000054893	360.572	368.514	403.692	316.581	305.231	364.611	291.952	318.955	244.573	304.316	353.2	289.949	0.283316	0.0324255	0.999941	Zfp667	7	6286579	6307883	protein_coding	zinc finger protein 667 [Source:MGI Symbol;Acc:MGI:2442757]
ENSMUSG00000032122	81.2278	72.9249	86.3387	92.1319	78.9558	89.9177	69.5124	71.1954	45.7966	66.348	83.5828	63.2131	0.402553	0.0324465	0.999941	Slc37a2	9	37227585	37255738	protein_coding	solute carrier family 37 (glycerol-3-phosphate transporter), member 2 [Source:MGI Symbol;Acc:MGI:1929693]
ENSMUSG00000011751	4570.55	3900.02	3038.19	3371.63	4039.26	3046.33	4665.89	4612.51	4071.03	4703.63	3661	4513.27	-0.301845	0.0324665	0.999941	Sptbn4	7	27356383	27447686	protein_coding	spectrin beta, non-erythrocytic 4 [Source:MGI Symbol;Acc:MGI:1890574]
ENSMUSG00000034115	3.96233	10.6957	3.50022	1.96025	50.0695	4.94053	3.20827	2.84782	0.974396	6.19248	12.5214	3.30574	1.91753	0.0327026	0.999941	Scn11a	9	119753759	119825456	protein_coding	sodium channel, voltage-gated, type XI, alpha [Source:MGI Symbol;Acc:MGI:1345149]
ENSMUSG00000045871	168.399	161.407	117.841	99.9729	67.4013	112.644	117.636	74.0432	70.1565	61.0402	121.278	80.7191	0.5906	0.0328192	0.999941	Slitrk6	14	110748580	110755149	protein_coding	SLIT and NTRK-like family, member 6 [Source:MGI Symbol;Acc:MGI:2443198]
ENSMUSG00000079466	39.6233	22.3636	18.6678	17.6423	25.0348	4.94053	19.2496	3.79709	5.84638	9.73104	21.3787	9.65603	1.15863	0.0328576	0.999941	Prdm12	2	31640037	31655795	protein_coding	PR domain containing 12 [Source:MGI Symbol;Acc:MGI:2685844]
ENSMUSG00000017832	1.98117	1.94466	0	0.980126	1.92575	1.97621	5.34711	4.74636	4.87198	4.4232	1.46799	4.84716	-1.69345	0.0328603	0.999941	Hspb9	11	100713850	100714575	protein_coding	heat shock protein, alpha-crystallin-related, B9 [Source:MGI Symbol;Acc:MGI:1922732]
ENSMUSG00000047443	4.95292	2.917	3.50022	2.94038	2.88863	1.97621	11.7636	4.74636	9.74396	5.30784	3.19589	7.89045	-1.29562	0.0328846	0.999941	Erfe	1	91366430	91374217	protein_coding	erythroferrone [Source:MGI Symbol;Acc:MGI:3606476]
ENSMUSG00000018362	499.254	456.024	681.376	481.242	419.814	501.958	410.658	339.839	424.837	433.474	506.611	402.202	0.331766	0.0329776	0.999941	Kpna2	11	106988629	106999541	protein_coding	karyopherin (importin) alpha 2 [Source:MGI Symbol;Acc:MGI:103561]
ENSMUSG00000068206	364.535	328.648	297.518	290.117	259.013	308.289	435.255	284.782	520.328	362.702	308.02	400.767	-0.379096	0.0331702	0.999941	Pick1	15	79229173	79249484	protein_coding	protein interacting with C kinase 1 [Source:MGI Symbol;Acc:MGI:894645]
ENSMUSG00000030403	205.051	221.692	214.68	191.125	191.612	191.693	270.564	181.311	338.115	254.776	202.642	261.192	-0.365996	0.0331912	0.999941	Vasp	7	19256929	19271817	protein_coding	vasodilator-stimulated phosphoprotein [Source:MGI Symbol;Acc:MGI:109268]
ENSMUSG00000022765	472.508	505.613	486.53	424.395	442.923	520.732	347.562	428.122	426.786	400.742	475.45	400.803	0.245391	0.033397	0.999941	Snap29	16	17405986	17430827	protein_coding	synaptosomal-associated protein 29 [Source:MGI Symbol;Acc:MGI:1914724]
ENSMUSG00000039956	7.92467	3.88933	10.5006	3.9205	1.92575	3.95243	2.13884	2.84782	0.974396	0	5.35222	1.49026	1.85572	0.0334042	0.999941	Mrap	16	90738207	90749785	protein_coding	melanocortin 2 receptor accessory protein [Source:MGI Symbol;Acc:MGI:1924287]
ENSMUSG00000000149	1780.08	1646.16	1599.6	1288.87	1503.05	1285.53	1797.7	1668.82	1951.72	1878.09	1517.21	1824.08	-0.265857	0.0336103	0.999941	Gna12	5	140758408	140830431	protein_coding	guanine nucleotide binding protein, alpha 12 [Source:MGI Symbol;Acc:MGI:95767]
ENSMUSG00000026229	1804.84	1864.93	1978.79	1783.83	1895.9	1954.48	1541.04	1834.94	1576.57	1652.51	1880.46	1651.27	0.187157	0.0338672	0.999941	Psmd1	1	86064387	86139151	protein_coding	proteasome (prosome, macropain) 26S subunit, non-ATPase, 1 [Source:MGI Symbol;Acc:MGI:1917497]
ENSMUSG00000021895	1353.14	1244.58	1149.24	1464.31	1153.52	1359.64	1064.08	1196.08	1071.84	1061.57	1287.4	1098.39	0.229256	0.0338861	0.999941	Arhgef3	14	27114899	27403911	protein_coding	Rho guanine nucleotide exchange factor (GEF) 3 [Source:MGI Symbol;Acc:MGI:1918954]
ENSMUSG00000073418	1581.96	1420.58	1918.12	1237.9	959.986	1048.38	1304.7	860.99	881.829	958.065	1361.15	1001.39	0.442793	0.033889	0.999941	C4b	17	34728380	34743882	protein_coding	complement component 4B (Chido blood group) [Source:MGI Symbol;Acc:MGI:88228]
ENSMUSG00000007812	618.124	731.194	659.207	770.379	653.792	837.915	485.518	625.57	616.793	616.594	711.769	586.119	0.279737	0.033897	0.999941	Zfp655	5	145231715	145247302	protein_coding	zinc finger protein 655 [Source:MGI Symbol;Acc:MGI:1919861]
ENSMUSG00000051515	146.606	136.126	180.845	144.079	149.246	155.133	203.19	144.289	229.958	194.621	152.006	193.014	-0.345703	0.0339325	0.999941	Fam181b	7	93079865	93081867	protein_coding	family with sequence similarity 181, member B [Source:MGI Symbol;Acc:MGI:1930951]
ENSMUSG00000054191	0.990583	0	3.50022	3.9205	4.81438	3.95243	7.48596	7.59418	7.79517	7.07712	2.86302	7.48811	-1.39061	0.034112	0.999941	Klf1	8	84901928	84905291	protein_coding	Kruppel-like factor 1 (erythroid) [Source:MGI Symbol;Acc:MGI:1342771]
ENSMUSG00000040170	61.4162	40.8379	28.0017	32.3442	33.7006	57.3102	14.9719	38.9202	31.1807	15.9235	42.2685	25.2491	0.743806	0.0342245	0.999941	Fmo2	1	162874317	162898726	protein_coding	flavin containing monooxygenase 2 [Source:MGI Symbol;Acc:MGI:1916776]
ENSMUSG00000036822	461.612	496.862	501.698	435.176	424.628	459.47	402.103	374.013	403.4	414.012	463.241	398.382	0.216832	0.0343857	0.999941	Topors	4	40259601	40269850	protein_coding	topoisomerase I binding, arginine/serine-rich [Source:MGI Symbol;Acc:MGI:2146189]
ENSMUSG00000015533	8.91525	7.77866	12.8341	13.7218	19.2575	16.7978	8.55538	6.6449	4.87198	7.07712	13.2175	6.78735	0.966513	0.0344061	0.999941	Itga2	13	114833081	114932100	protein_coding	integrin alpha 2 [Source:MGI Symbol;Acc:MGI:96600]
ENSMUSG00000033900	2022.77	2548.48	1794.44	1756.39	2123.14	2186.68	1869.35	1774.19	1502.52	1681.7	2071.98	1706.94	0.279853	0.0344908	0.999941	Map9	3	82358044	82395268	protein_coding	microtubule-associated protein 9 [Source:MGI Symbol;Acc:MGI:2442208]
ENSMUSG00000063320	85.1902	101.123	89.8389	103.893	75.1043	80.0367	118.706	91.1301	124.723	126.504	89.1976	115.266	-0.37009	0.034507	0.999941	1190007I07Rik	10	82619851	82623228	protein_coding	RIKEN cDNA 1190007I07 gene [Source:MGI Symbol;Acc:MGI:3698433]
ENSMUSG00000025432	7.92467	12.6403	8.16717	17.6423	113.619	20.7502	8.55538	8.54345	14.6159	12.385	30.124	11.0249	1.45155	0.0345889	0.999941	Avil	10	127000709	127020994	protein_coding	advillin [Source:MGI Symbol;Acc:MGI:1333798]
ENSMUSG00000021280	25.7552	27.2253	23.3348	29.4038	34.6635	27.667	29.9438	54.1085	44.8222	35.3856	28.0083	41.065	-0.551019	0.0346727	0.999941	Exoc3l4	12	111417017	111431678	protein_coding	exocyst complex component 3-like 4 [Source:MGI Symbol;Acc:MGI:1921363]
ENSMUSG00000039963	73.3032	48.6166	73.5045	50.9666	58.7354	50.3935	60.9571	27.5289	32.1551	40.6934	59.2533	40.3336	0.558281	0.0348787	0.999941	Ccdc40	11	119228572	119265236	protein_coding	coiled-coil domain containing 40 [Source:MGI Symbol;Acc:MGI:2443893]
ENSMUSG00000073062	351.657	373.375	386.191	395.971	356.264	450.577	319.757	326.55	345.911	312.278	385.672	326.124	0.242008	0.0349307	0.999941	Zxdb	X	94724569	94730187	protein_coding	zinc finger, X-linked, duplicated B [Source:MGI Symbol;Acc:MGI:3694898]
ENSMUSG00000037826	1355.12	1639.35	1641.6	1574.08	1664.81	1681.76	1306.83	1397.33	1458.67	1372.96	1592.79	1383.95	0.202596	0.0349373	0.999941	Ppm1k	6	57506502	57535468	protein_coding	protein phosphatase 1K (PP2C domain containing) [Source:MGI Symbol;Acc:MGI:2442111]
ENSMUSG00000050295	118.87	87.5099	110.84	95.0722	97.2504	102.763	153.997	121.507	121.8	119.426	102.051	129.182	-0.339035	0.0351108	0.999941	Foxc1	13	31806633	31812476	protein_coding	forkhead box C1 [Source:MGI Symbol;Acc:MGI:1347466]
ENSMUSG00000032763	413.073	395.739	297.518	486.143	462.18	381.409	532.572	425.274	586.587	505.129	406.01	512.391	-0.334459	0.0352036	0.999941	Ilvbl	10	78574346	78584502	protein_coding	ilvB (bacterial acetolactate synthase)-like [Source:MGI Symbol;Acc:MGI:1351911]
ENSMUSG00000055866	730.06	633.96	375.69	469.48	566.171	520.732	334.729	559.121	305.96	401.627	549.349	400.359	0.456468	0.0352201	0.999941	Per2	1	91415982	91459324	protein_coding	period circadian clock 2 [Source:MGI Symbol;Acc:MGI:1195265]
ENSMUSG00000040599	377.412	383.099	452.695	407.732	411.148	450.577	297.299	374.962	348.834	368.895	413.777	347.498	0.24988	0.0354816	0.999941	Mis12	11	71019611	71027371	protein_coding	MIS12 kinetochore complex component [Source:MGI Symbol;Acc:MGI:1914389]
ENSMUSG00000041872	2.97175	0.972332	0	3.9205	1.92575	0.988107	0	0	0	0	1.79641	0	3.34717	0.0355416	0.999941	Il17f	1	20777146	20790617	protein_coding	interleukin 17F [Source:MGI Symbol;Acc:MGI:2676631]
ENSMUSG00000027438	7849.38	9370.36	9317.58	8588.85	8733.28	9014.5	7344.79	8350.75	7703.58	7658.33	8812.32	7764.36	0.182595	0.0358506	0.999941	Napb	2	148693985	148732467	protein_coding	N-ethylmaleimide sensitive fusion protein attachment protein beta [Source:MGI Symbol;Acc:MGI:104562]
ENSMUSG00000103906	123.823	92.3715	126.008	126.436	96.2875	83.001	167.899	123.405	141.287	130.927	107.988	140.88	-0.38356	0.0359786	0.999941	Tigd5	15	75909735	75914535	protein_coding	tigger transposable element derived 5 [Source:MGI Symbol;Acc:MGI:2145902]
ENSMUSG00000026988	210.004	234.332	225.181	204.846	221.461	202.562	163.622	180.362	183.186	196.39	216.398	180.89	0.256341	0.0364958	0.999941	Wdsub1	2	59852364	59882591	protein_coding	WD repeat, SAM and U-box domain containing 1 [Source:MGI Symbol;Acc:MGI:1919387]
ENSMUSG00000031936	0	0	0	0.980126	0	0.988107	7.48596	0.949272	0.974396	1.76928	0.328039	2.79473	-2.93573	0.0371442	0.999941	Hephl1	9	15051841	15112108	protein_coding	hephaestin-like 1 [Source:MGI Symbol;Acc:MGI:2685355]
ENSMUSG00000018861	271.42	198.356	245.015	334.223	279.234	259.872	368.951	272.441	416.067	307.855	264.687	341.328	-0.365912	0.0372312	0.999941	Fdxr	11	115268024	115277050	protein_coding	ferredoxin reductase [Source:MGI Symbol;Acc:MGI:104724]
ENSMUSG00000022292	733.032	704.941	691.876	610.619	771.263	756.89	519.739	658.795	601.202	630.748	711.437	602.621	0.238845	0.0372544	0.999941	Rrm2b	15	37923952	37961318	protein_coding	ribonucleotide reductase M2 B (TP53 inducible) [Source:MGI Symbol;Acc:MGI:2155865]
ENSMUSG00000005802	1184.74	1325.29	1142.24	1355.51	1452.98	1540.46	1000.98	1308.1	1041.63	1076.61	1333.54	1106.83	0.268901	0.0373385	0.999941	Slc30a4	2	122681233	122702663	protein_coding	solute carrier family 30 (zinc transporter), member 4 [Source:MGI Symbol;Acc:MGI:1345282]
ENSMUSG00000079043	91.1337	68.0632	93.3391	91.1517	72.2156	80.0367	48.124	50.3114	71.1309	75.1944	82.6567	61.1902	0.427856	0.0373808	0.999941	Fastkd5	2	130613840	130630027	protein_coding	FAST kinase domains 5 [Source:MGI Symbol;Acc:MGI:2139469]
ENSMUSG00000025650	61.4162	57.3676	49.003	102.913	127.1	109.68	91.9703	131.949	135.441	150.389	84.5799	127.437	-0.59025	0.0375103	0.999941	Col7a1	9	108953586	108984875	protein_coding	collagen, type VII, alpha 1 [Source:MGI Symbol;Acc:MGI:88462]
ENSMUSG00000032060	1776.12	1149.3	1712.77	1204.58	1422.17	1294.42	1530.34	1693.5	2040.39	1921.44	1426.56	1796.42	-0.332944	0.0375428	0.999941	Cryab	9	50751325	50756636	protein_coding	crystallin, alpha B [Source:MGI Symbol;Acc:MGI:88516]
ENSMUSG00000036943	911.337	992.751	971.893	1010.51	961.912	991.071	740.04	913.2	864.289	877.563	973.246	848.773	0.196747	0.0377286	0.999941	Rab8b	9	66843664	66919687	protein_coding	RAB8B, member RAS oncogene family [Source:MGI Symbol;Acc:MGI:2442982]
ENSMUSG00000075410	57.4538	49.5889	36.1689	47.0461	64.5126	36.56	73.7901	49.3621	88.6701	65.4634	48.5551	69.3214	-0.508748	0.0379143	0.999941	Prcd	11	116653534	116668389	protein_coding	photoreceptor disc component [Source:MGI Symbol;Acc:MGI:3649529]
ENSMUSG00000028415	0.990583	3.88933	4.66696	0.980126	1.92575	0.988107	0	0.949272	0	0	2.24014	0.237318	2.91856	0.0379178	0.999941	Spink4	4	40920052	40931395	protein_coding	serine peptidase inhibitor, Kazal type 4 [Source:MGI Symbol;Acc:MGI:1341848]
ENSMUSG00000001334	1524.51	1255.28	1521.43	1590.74	1581.04	1400.15	1518.58	1672.62	1930.28	1849.78	1478.86	1742.81	-0.237221	0.0380202	0.999941	Fndc5	4	129136999	129144593	protein_coding	fibronectin type III domain containing 5 [Source:MGI Symbol;Acc:MGI:1917614]
ENSMUSG00000022507	1043.08	1088.04	1003.4	1095.78	1186.26	1370.5	807.414	1079.32	900.342	968.681	1131.18	938.94	0.268556	0.0380923	0.999941	1810013L24Rik	16	8830100	8858922	protein_coding	RIKEN cDNA 1810013L24 gene [Source:MGI Symbol;Acc:MGI:1916303]
ENSMUSG00000063358	9842.44	11111.8	11735.1	9178.88	9223.38	8801.07	9037.69	8927.9	7878.97	7931.68	9982.11	8444.06	0.241387	0.0382767	0.999941	Mapk1	16	16983382	17047453	protein_coding	mitogen-activated protein kinase 1 [Source:MGI Symbol;Acc:MGI:1346858]
ENSMUSG00000045179	46.5574	25.2806	52.5032	23.523	11.5545	13.8335	59.8876	38.9202	44.8222	59.2709	28.8754	50.7252	-0.819743	0.0383024	0.999941	Sox3	X	60891366	60893430	protein_coding	SRY (sex determining region Y)-box 3 [Source:MGI Symbol;Acc:MGI:98365]
ENSMUSG00000053025	6915.26	8256.07	9317.58	6412.97	7138.76	6221.12	6083.94	6439.86	5785.96	6044.75	7376.96	6088.63	0.276832	0.0383918	0.999941	Sv2b	7	75114894	75309262	protein_coding	synaptic vesicle glycoprotein 2 b [Source:MGI Symbol;Acc:MGI:1927338]
ENSMUSG00000005124	78.2561	50.5613	108.507	42.1454	78.9558	38.5362	44.9157	52.21	29.2319	40.6934	66.1602	41.7628	0.660255	0.0384233	0.999941	Wisp1	15	66891320	66923201	protein_coding	WNT1 inducible signaling pathway protein 1 [Source:MGI Symbol;Acc:MGI:1197008]
ENSMUSG00000024778	40.6139	26.253	36.1689	37.2448	33.7006	52.3697	37.4298	15.1884	21.4367	23.8853	37.7251	24.485	0.631499	0.0386982	0.999941	Fas	19	34290659	34327770	protein_coding	Fas (TNF receptor superfamily member 6) [Source:MGI Symbol;Acc:MGI:95484]
ENSMUSG00000078502	2.97175	11.668	3.50022	3.9205	4.81438	2.96432	0	1.89854	1.94879	1.76928	4.97319	1.40415	1.80165	0.0388071	0.999941	Gm13212	4	145585166	145625345	protein_coding	predicted gene 13212 [Source:MGI Symbol;Acc:MGI:3651014]
ENSMUSG00000050675	13.8682	12.6403	24.5015	14.7019	12.5174	12.8454	43.8463	18.9854	17.5391	23.0006	15.1791	25.8429	-0.770047	0.0388674	0.999941	Gp1ba	11	70639122	70642036	protein_coding	glycoprotein 1b, alpha polypeptide [Source:MGI Symbol;Acc:MGI:1333744]
ENSMUSG00000053799	524.019	563.953	661.541	560.632	565.208	495.042	499.42	489.824	452.12	472.398	561.732	478.441	0.230859	0.0389096	0.999941	Exoc6	19	37550418	37683245	protein_coding	exocyst complex component 6 [Source:MGI Symbol;Acc:MGI:1351611]
ENSMUSG00000028962	597.322	573.676	463.195	546.91	676.901	497.018	700.472	635.063	632.383	728.943	559.17	674.215	-0.26921	0.0391879	0.999941	Slc4a2	5	24423837	24440950	protein_coding	solute carrier family 4 (anion exchanger), member 2 [Source:MGI Symbol;Acc:MGI:109351]
ENSMUSG00000021209	883.6	878.016	926.391	1022.27	1041.83	1140.28	687.639	895.164	836.032	866.063	982.064	821.224	0.257637	0.0392076	0.999941	Ppp4r4	12	103532283	103613831	protein_coding	protein phosphatase 4, regulatory subunit 4 [Source:MGI Symbol;Acc:MGI:1921771]
ENSMUSG00000048118	623.077	725.36	583.369	660.605	737.562	744.045	489.795	685.374	514.481	550.246	679.003	559.974	0.278051	0.0392646	0.999941	Arid4a	12	71015990	71098592	protein_coding	AT rich interactive domain 4A (RBP1-like) [Source:MGI Symbol;Acc:MGI:2444354]
ENSMUSG00000028699	0	0	2.33348	4.90063	3.8515	8.89296	5.34711	8.54345	12.6672	12.385	3.32976	9.73567	-1.5478	0.0393248	0.999941	Tspan1	4	116161869	116167601	protein_coding	tetraspanin 1 [Source:MGI Symbol;Acc:MGI:1914055]
ENSMUSG00000068551	472.508	452.134	329.02	520.447	414.999	454.529	548.614	513.556	536.892	540.515	440.606	534.894	-0.278541	0.0393935	0.999941	Zfp467	6	48427697	48445825	protein_coding	zinc finger protein 467 [Source:MGI Symbol;Acc:MGI:1916160]
ENSMUSG00000020692	152.55	146.822	103.84	151.92	151.171	155.133	206.398	170.869	168.571	172.505	143.573	179.586	-0.318586	0.0395666	0.999941	Nle1	11	82900768	82908411	protein_coding	notchless homolog 1 [Source:MGI Symbol;Acc:MGI:2429770]
ENSMUSG00000020362	1168.89	1209.58	1096.73	1515.28	1429.87	1814.16	884.412	1233.1	1028.96	1169.49	1372.42	1078.99	0.346941	0.0396301	0.999941	Cnot6	11	49671503	49712723	protein_coding	CCR4-NOT transcription complex, subunit 6 [Source:MGI Symbol;Acc:MGI:2144529]
ENSMUSG00000020448	615.152	556.174	688.376	613.559	587.354	582.983	512.253	529.694	542.739	525.476	607.266	527.54	0.201981	0.0398141	0.999941	Rnf185	11	3415982	3452363	protein_coding	ring finger protein 185 [Source:MGI Symbol;Acc:MGI:1922078]
ENSMUSG00000021668	209.013	216.83	198.346	297.958	303.306	313.23	122.984	228.775	216.316	188.428	256.447	189.126	0.438753	0.0398919	0.999941	Polk	13	96480690	96542579	protein_coding	polymerase (DNA directed), kappa [Source:MGI Symbol;Acc:MGI:1349767]
ENSMUSG00000064254	179.296	145.85	162.177	142.118	107.842	97.8226	180.732	131	223.137	225.583	139.184	190.113	-0.451384	0.0399287	0.999941	Ethe1	7	24587543	24608925	protein_coding	ethylmalonic encephalopathy 1 [Source:MGI Symbol;Acc:MGI:1913321]
ENSMUSG00000057069	559.68	494.917	576.369	536.129	533.433	572.114	451.296	516.404	480.377	439.666	545.44	471.936	0.208359	0.0399338	0.999941	Ero1lb	13	12565874	12611396	protein_coding	ERO1-like beta (S. cerevisiae) [Source:MGI Symbol;Acc:MGI:1914725]
ENSMUSG00000051323	973.743	1057.9	990.561	758.618	911.843	859.653	806.344	842.004	737.618	732.482	925.386	779.612	0.247293	0.0401457	0.999941	Pcdh19	X	133582860	133688987	protein_coding	protocadherin 19 [Source:MGI Symbol;Acc:MGI:2685563]
ENSMUSG00000008398	128.776	137.099	152.843	119.575	174.28	147.228	112.289	117.71	124.723	102.618	143.3	114.335	0.32606	0.040184	0.999941	Elk3	10	93247414	93311135	protein_coding	ELK3, member of ETS oncogene family [Source:MGI Symbol;Acc:MGI:101762]
ENSMUSG00000075602	352.648	256.696	494.697	315.601	310.046	377.457	237.412	172.768	328.372	291.931	351.191	257.621	0.445698	0.0401876	0.999941	Ly6a	15	74994877	74998031	protein_coding	lymphocyte antigen 6 complex, locus A [Source:MGI Symbol;Acc:MGI:107527]
ENSMUSG00000059173	2792.45	3347.74	4189.76	2032.78	2337.86	2177.79	2527.04	2049.48	1879.61	1906.4	2813.06	2090.63	0.428144	0.0401938	0.999941	Pde1a	2	79834453	80129458	protein_coding	phosphodiesterase 1A, calmodulin-dependent [Source:MGI Symbol;Acc:MGI:1201792]
ENSMUSG00000046442	3750.35	4302.57	3961.08	3293.22	3884.24	3877.33	3364.4	3682.23	2943.65	3200.63	3844.8	3297.73	0.221429	0.0403153	0.999941	Ppm1e	11	87226906	87359023	protein_coding	protein phosphatase 1E (PP2C domain containing) [Source:MGI Symbol;Acc:MGI:2444096]
ENSMUSG00000054626	25.7552	23.336	22.168	11.7615	7.703	17.7859	4.27769	9.49272	11.6928	12.385	18.0849	9.46203	0.919293	0.0403504	0.999941	Xlr	X	53777118	53797706	protein_coding	X-linked lymphocyte-regulated [Source:MGI Symbol;Acc:MGI:98976]
ENSMUSG00000023262	159.484	160.435	165.677	163.681	146.357	83.001	240.62	121.507	244.573	218.506	146.439	206.302	-0.49441	0.040442	0.999941	Acy1	9	106432981	106438319	protein_coding	aminoacylase 1 [Source:MGI Symbol;Acc:MGI:87913]
ENSMUSG00000021068	978.696	1092.9	836.552	824.286	1069.75	1018.74	827.733	890.417	621.665	832.446	970.155	793.065	0.291006	0.0405998	0.999941	Nin	12	70011435	70113717	protein_coding	ninein [Source:MGI Symbol;Acc:MGI:105108]
ENSMUSG00000026114	7.92467	4.86166	3.50022	5.88076	1.92575	4.94053	2.13884	1.89854	1.94879	0	4.83893	1.49655	1.72707	0.0408749	0.999941	Cnga3	1	37214434	37263384	protein_coding	cyclic nucleotide gated channel alpha 3 [Source:MGI Symbol;Acc:MGI:1341818]
ENSMUSG00000008129	46.5574	40.8379	40.8359	45.0858	34.6635	39.5243	91.9703	40.8187	58.4638	47.7706	41.2508	59.7558	-0.528522	0.0408757	0.999941	4930432K21Rik	8	84148025	84172590	protein_coding	RIKEN cDNA 4930432K21 gene [Source:MGI Symbol;Acc:MGI:1921916]
ENSMUSG00000079462	0	0	0	0	0	0.988107	1.06942	3.79709	2.92319	0.88464	0.164684	2.16858	-3.06827	0.0408887	0.999941	Gm15737	6	92869357	92884411	protein_coding	predicted gene 15737 [Source:MGI Symbol;Acc:MGI:3783179]
ENSMUSG00000096271	1.98117	1.94466	3.50022	5.88076	3.8515	12.8454	1.06942	0	0	3.53856	5.00062	1.152	2.08368	0.0412327	0.999941	Ccl21c	GL456350.1	211325	212455	protein_coding	chemokine (C-C motif) ligand 21C (leucine) [Source:MGI Symbol;Acc:MGI:1891386]
ENSMUSG00000073422	3.96233	0	2.33348	1.96025	0.962875	0	6.41653	1.89854	6.82077	6.19248	1.53649	5.33208	-1.8083	0.0413081	0.999941	H2-Ke6	17	34026033	34028060	protein_coding	H2-K region expressed gene 6 [Source:MGI Symbol;Acc:MGI:95911]
ENSMUSG00000039100	5068.81	5677.45	5116.15	5427.94	5569.27	6076.86	4480.88	5329.21	4590.38	4795.63	5489.41	4799.03	0.1939	0.0413262	0.999941	Marchf6	15	31455891	31531053	protein_coding	membrane-associated ring finger (C3HC4) 6 [Source:MGI Symbol;Acc:MGI:2442773]
ENSMUSG00000025137	1365.02	1083.18	1249.58	1245.74	1014.87	993.047	1613.76	1106.85	1578.52	1414.54	1158.57	1428.42	-0.302027	0.0413274	0.999941	Pcyt2	11	120610087	120617936	protein_coding	phosphate cytidylyltransferase 2, ethanolamine [Source:MGI Symbol;Acc:MGI:1915921]
ENSMUSG00000044556	1.98117	4.86166	2.33348	1.96025	3.8515	0.988107	6.41653	4.74636	9.74396	6.19248	2.66269	6.77483	-1.3397	0.0414351	0.999941	Tex38	4	115779834	115781018	protein_coding	testis expressed 38 [Source:MGI Symbol;Acc:MGI:1922423]
ENSMUSG00000049516	403.167	475.47	388.524	409.693	499.732	520.732	390.339	392.049	337.141	378.626	449.553	374.539	0.264222	0.0414803	0.999941	Spty2d1	7	46990396	47008411	protein_coding	SPT2, Suppressor of Ty, domain containing 1 (S. cerevisiae) [Source:MGI Symbol;Acc:MGI:2142062]
ENSMUSG00000031967	531.943	521.17	508.698	505.745	536.321	442.672	530.433	598.991	595.356	626.325	507.758	587.776	-0.211848	0.0415452	0.999941	Afg3l1	8	123477903	123503916	protein_coding	AFG3-like AAA ATPase 1 [Source:MGI Symbol;Acc:MGI:1928277]
ENSMUSG00000059842	163.446	123.486	150.509	136.238	158.874	115.609	206.398	159.478	166.622	174.274	141.36	176.693	-0.32107	0.0416237	0.999941	Zfp341	2	154613297	154646821	protein_coding	zinc finger protein 341 [Source:MGI Symbol;Acc:MGI:2682937]
ENSMUSG00000056832	177.314	199.328	200.679	165.641	173.318	218.372	116.567	187.956	156.878	135.35	189.109	149.188	0.340207	0.0416498	0.999941	Ttc26	6	38381469	38427647	protein_coding	tetratricopeptide repeat domain 26 [Source:MGI Symbol;Acc:MGI:2444853]
ENSMUSG00000024293	426.941	481.304	480.696	523.387	555.579	557.292	313.341	457.549	425.811	449.397	504.2	411.525	0.292005	0.0417386	0.999941	Esco1	18	10566602	10610352	protein_coding	establishment of sister chromatid cohesion N-acetyltransferase 1 [Source:MGI Symbol;Acc:MGI:1925055]
ENSMUSG00000042567	64.3879	108.901	58.3369	71.5492	82.8073	77.0723	74.8596	55.0578	41.899	49.5398	77.1758	55.3391	0.48644	0.0417694	0.999941	Nek10	14	14803415	15012059	protein_coding	NIMA (never in mitosis gene a)- related kinase 10 [Source:MGI Symbol;Acc:MGI:2685128]
ENSMUSG00000048385	3406.62	3127.99	2041.79	2859.03	2788.49	2317.11	3394.35	3591.1	3128.79	3544.75	2756.84	3414.75	-0.308626	0.0419209	0.999941	Scrt1	15	76516203	76522499	protein_coding	scratch family zinc finger 1 [Source:MGI Symbol;Acc:MGI:2176606]
ENSMUSG00000030598	33.6798	37.9209	65.3374	50.9666	47.1809	36.56	86.6232	54.1085	64.3101	53.0784	45.2743	64.5301	-0.512357	0.0420167	0.999941	Fbxo17	7	28716804	28738144	protein_coding	F-box protein 17 [Source:MGI Symbol;Acc:MGI:1354707]
ENSMUSG00000040600	1.98117	0	0	0	0.962875	0.988107	2.13884	1.89854	1.94879	7.96176	0.655358	3.48699	-2.40224	0.0421082	0.999941	Eps8l3	3	107877229	107892900	protein_coding	EPS8-like 3 [Source:MGI Symbol;Acc:MGI:2139743]
ENSMUSG00000025025	1429.41	1172.63	1443.26	1308.47	1095.75	1411.02	1132.52	1071.73	1169.28	1093.42	1310.09	1116.73	0.230172	0.0421732	0.999941	Mxi1	19	53310506	53375810	protein_coding	MAX interactor 1, dimerization protein [Source:MGI Symbol;Acc:MGI:97245]
ENSMUSG00000040312	95.096	101.123	99.1728	110.754	104.953	107.704	177.524	108.217	114.979	129.157	103.134	132.469	-0.357647	0.0422756	0.999941	Cchcr1	17	35517100	35531015	protein_coding	coiled-coil alpha-helical rod protein 1 [Source:MGI Symbol;Acc:MGI:2385321]
ENSMUSG00000026176	388.309	357.818	319.686	351.865	347.598	317.182	491.934	355.028	431.658	388.357	347.076	416.744	-0.262184	0.0423095	0.999941	Ctdsp1	1	74391509	74397285	protein_coding	CTD (carboxy-terminal domain, RNA polymerase II, polypeptide A) small phosphatase 1 [Source:MGI Symbol;Acc:MGI:2654470]
ENSMUSG00000050944	59.435	61.2569	66.5041	60.7678	47.1809	32.6075	38.4992	40.8187	19.4879	46.8859	54.6254	36.4229	0.580374	0.0424273	0.999941	Efcab5	11	77089915	77188968	protein_coding	EF-hand calcium binding domain 5 [Source:MGI Symbol;Acc:MGI:2442440]
ENSMUSG00000025482	1.98117	0.972332	2.33348	0.980126	0	0.988107	5.34711	3.79709	4.87198	2.65392	1.2092	4.16753	-1.8066	0.0425048	0.999941	Odf3	7	140847805	140851018	protein_coding	outer dense fiber of sperm tails 3 [Source:MGI Symbol;Acc:MGI:1916537]
ENSMUSG00000028420	233.778	230.443	306.852	280.316	260.939	267.777	208.537	188.905	252.369	214.083	263.351	215.974	0.28495	0.0426134	0.999941	Tmem38b	4	53826045	53862019	protein_coding	transmembrane protein 38B [Source:MGI Symbol;Acc:MGI:1098718]
ENSMUSG00000031889	639.917	683.549	625.372	703.731	658.607	724.282	572.141	676.831	511.558	531.669	672.576	573.05	0.231416	0.0426673	0.999941	D230025D16Rik	8	105225145	105253053	protein_coding	RIKEN cDNA D230025D16 gene [Source:MGI Symbol;Acc:MGI:2443049]
ENSMUSG00000045776	6.93408	5.83399	3.50022	12.7416	6.74013	8.89296	24.5967	21.8333	10.7184	5.30784	7.4405	15.614	-1.05267	0.0426738	0.999941	Lrtm1	14	29018208	29033645	protein_coding	leucine-rich repeats and transmembrane domains 1 [Source:MGI Symbol;Acc:MGI:2442106]
ENSMUSG00000022329	216.938	256.696	330.187	267.574	284.048	322.123	228.856	219.282	241.65	220.275	279.594	227.516	0.296498	0.042828	0.999941	Stk3	15	34875496	35178921	protein_coding	serine/threonine kinase 3 [Source:MGI Symbol;Acc:MGI:1928487]
ENSMUSG00000042557	583.454	657.296	627.706	643.943	653.792	734.163	494.073	680.628	487.198	495.398	650.059	539.324	0.269305	0.0429153	0.999941	Sin3a	9	57072040	57128366	protein_coding	transcriptional regulator, SIN3A (yeast) [Source:MGI Symbol;Acc:MGI:107157]
ENSMUSG00000050394	70.3314	80.7036	72.3378	74.4896	61.624	72.1318	111.22	78.7896	86.7213	92.0026	71.9364	92.1833	-0.355374	0.0430629	0.999941	Armcx6	X	134748461	134751417	protein_coding	armadillo repeat containing, X-linked 6 [Source:MGI Symbol;Acc:MGI:2147993]
ENSMUSG00000061411	1003.46	909.13	794.549	760.578	911.843	810.248	766.776	795.49	612.895	728.059	864.968	725.805	0.253372	0.0430683	0.999941	Nol4l	2	153407462	153529971	protein_coding	nucleolar protein 4-like [Source:MGI Symbol;Acc:MGI:1918765]
ENSMUSG00000049303	373.45	351.012	406.025	418.514	468.92	382.397	425.63	489.824	467.71	510.437	400.053	473.4	-0.243659	0.0430958	0.999941	Syt12	19	4445908	4477447	protein_coding	synaptotagmin XII [Source:MGI Symbol;Acc:MGI:2159601]
ENSMUSG00000024083	10997.5	12558.6	11875.1	12475	12004.2	13122.1	9804.46	11399.8	11033.1	10843	12172.1	10770.1	0.176514	0.0432014	0.999941	Pja2	17	64281005	64331916	protein_coding	praja ring finger ubiquitin ligase 2 [Source:MGI Symbol;Acc:MGI:2159342]
ENSMUSG00000078877	196.136	246	302.185	197.985	255.162	289.515	151.858	215.485	229.958	165.428	247.831	190.682	0.376741	0.0433581	0.999941	Gm14295	2	176798612	176811223	protein_coding	predicted gene 14295 [Source:MGI Symbol;Acc:MGI:3709624]
ENSMUSG00000028789	501.235	549.368	491.197	532.209	440.997	356.707	643.792	443.31	667.461	662.595	478.619	604.29	-0.336341	0.0435354	0.999941	Azin2	4	128930233	128962442	protein_coding	antizyme inhibitor 2 [Source:MGI Symbol;Acc:MGI:2442093]
ENSMUSG00000091648	14.8588	15.5573	12.8341	15.682	20.2204	11.8573	25.6661	23.7318	23.3855	21.2314	15.1683	23.5037	-0.624803	0.043572	0.999941	C2cd4d	3	94362438	94364566	protein_coding	C2 calcium-dependent domain containing 4D [Source:MGI Symbol;Acc:MGI:2685505]
ENSMUSG00000039988	1735.5	1598.51	1879.62	1665.23	1691.77	1747.96	1353.89	1544.47	1580.47	1574.66	1719.77	1513.37	0.183828	0.0435971	0.999941	Ankrd13c	3	157947239	158008034	protein_coding	ankyrin repeat domain 13c [Source:MGI Symbol;Acc:MGI:2139746]
ENSMUSG00000035161	507.179	497.834	568.202	567.493	638.386	646.222	423.491	546.781	458.941	478.59	570.886	476.951	0.258833	0.0437649	0.999941	Ints6	14	62676330	62761169	protein_coding	integrator complex subunit 6 [Source:MGI Symbol;Acc:MGI:1202397]
ENSMUSG00000032715	17.8305	0	9.33391	10.7814	1.92575	8.89296	23.5273	13.2898	20.4623	18.5774	8.12742	18.9642	-1.22477	0.0438592	0.999941	Trib3	2	152337422	152344032	protein_coding	tribbles pseudokinase 3 [Source:MGI Symbol;Acc:MGI:1345675]
ENSMUSG00000032726	5.9435	3.88933	4.66696	0.980126	4.81438	0	0	1.89854	0	0	3.38238	0.474636	2.79977	0.043931	0.999941	Bmp8a	4	123312645	123343252	protein_coding	bone morphogenetic protein 8a [Source:MGI Symbol;Acc:MGI:104515]
ENSMUSG00000052676	350.667	385.043	463.195	430.275	436.182	500.97	333.66	359.774	382.938	350.317	427.722	356.672	0.261391	0.0440027	0.999941	Zmat1	X	134971372	135009209	protein_coding	zinc finger, matrin type 1 [Source:MGI Symbol;Acc:MGI:2442284]
ENSMUSG00000019789	97.0772	96.2609	133.008	74.4896	85.6959	83.9891	79.1372	56.0071	84.7725	61.9248	95.0868	70.4604	0.431402	0.0441081	0.999941	Hey2	10	30832359	30842801	protein_coding	hairy/enhancer-of-split related with YRPW motif 2 [Source:MGI Symbol;Acc:MGI:1341884]
ENSMUSG00000028107	620.105	528.949	578.702	554.751	563.282	499.982	687.639	594.244	649.922	642.249	557.629	643.513	-0.20653	0.044209	0.999941	Tars2	3	95739976	95760206	protein_coding	threonyl-tRNA synthetase 2, mitochondrial (putative) [Source:MGI Symbol;Acc:MGI:1919057]
ENSMUSG00000052957	141.653	140.988	136.508	202.886	193.538	118.573	188.218	180.362	211.444	224.699	155.691	201.181	-0.369345	0.0443147	0.999941	Gas1	13	60174405	60177365	protein_coding	growth arrest specific 1 [Source:MGI Symbol;Acc:MGI:95655]
ENSMUSG00000031343	2324.9	2588.35	2599.49	1931.83	2261.79	2226.2	2176.27	2099.79	1792.89	1771.05	2322.09	1960	0.244629	0.0445191	0.999941	Gabra3	X	72432681	72656848	protein_coding	gamma-aminobutyric acid (GABA) A receptor, subunit alpha 3 [Source:MGI Symbol;Acc:MGI:95615]
ENSMUSG00000024081	704.305	699.107	801.55	703.731	690.381	832.974	618.126	654.048	665.513	628.094	738.675	641.445	0.203023	0.0446535	0.999941	Cebpz	17	78919006	78937066	protein_coding	CCAAT/enhancer binding protein zeta [Source:MGI Symbol;Acc:MGI:109386]
ENSMUSG00000026484	517.085	585.344	627.706	657.665	601.797	683.77	517.6	478.433	594.382	475.052	612.228	516.367	0.245941	0.0446668	0.999941	Rnf2	1	151458004	151500955	protein_coding	ring finger protein 2 [Source:MGI Symbol;Acc:MGI:1101759]
ENSMUSG00000073094	3.96233	2.917	7.00043	0	7.703	3.95243	1.06942	0.949272	1.94879	0	4.25587	0.991872	2.11825	0.0446914	0.999941	Smim9	X	75146056	75163770	protein_coding	small integral membrane protein 9 [Source:MGI Symbol;Acc:MGI:3588243]
ENSMUSG00000090137	125.804	68.0632	77.0048	80.3703	50.0695	55.334	143.303	68.3476	121.8	117.657	76.1077	112.777	-0.566693	0.0447453	0.999941	Uba52	8	70508263	70510801	protein_coding	ubiquitin A-52 residue ribosomal protein fusion product 1 [Source:MGI Symbol;Acc:MGI:98887]
ENSMUSG00000016427	508.169	396.711	505.198	362.647	256.125	247.027	686.569	287.629	722.028	538.746	379.313	558.743	-0.559005	0.0447455	0.999941	Ndufa1	X	37187588	37191163	protein_coding	NADH:ubiquinone oxidoreductase subunit A1 [Source:MGI Symbol;Acc:MGI:1929511]
ENSMUSG00000001767	317.977	365.597	409.525	351.865	339.895	358.683	272.703	324.651	304.986	310.509	357.257	303.212	0.234502	0.0448636	0.999941	Crnkl1	2	145917479	145935014	protein_coding	crooked neck pre-mRNA splicing factor 1 [Source:MGI Symbol;Acc:MGI:1914127]
ENSMUSG00000028017	21.7928	25.2806	28.0017	49.9864	44.2923	30.6313	38.4992	54.1085	59.4382	46.0013	33.3309	49.5118	-0.569595	0.0451689	0.999941	Egf	3	129677565	129755316	protein_coding	epidermal growth factor [Source:MGI Symbol;Acc:MGI:95290]
ENSMUSG00000029366	549.774	527.976	521.532	610.619	527.656	592.864	362.534	450.904	538.841	495.398	555.07	461.919	0.264223	0.0451873	0.999941	Dck	5	88764996	88783281	protein_coding	deoxycytidine kinase [Source:MGI Symbol;Acc:MGI:102726]
ENSMUSG00000078350	159.484	155.573	162.177	146.039	148.283	122.525	179.663	163.275	218.265	170.736	149.013	182.985	-0.296635	0.0452302	0.999941	Smim1	4	154020470	154026230	protein_coding	small integral membrane protein 1 [Source:MGI Symbol;Acc:MGI:1916109]
ENSMUSG00000064293	777.608	895.518	897.222	736.075	923.397	895.225	726.138	815.425	672.333	708.597	854.174	730.623	0.225241	0.045255	0.999941	Cntn4	6	105677660	106699310	protein_coding	contactin 4 [Source:MGI Symbol;Acc:MGI:1095737]
ENSMUSG00000035495	193.164	188.632	136.508	143.098	160.8	153.157	85.5538	176.565	81.8493	128.273	162.56	118.06	0.459891	0.045322	0.999941	Tstd2	4	46114746	46138694	protein_coding	thiosulfate sulfurtransferase (rhodanese)-like domain containing 2 [Source:MGI Symbol;Acc:MGI:3039624]
ENSMUSG00000073421	43.5857	20.419	40.8359	18.6224	24.0719	11.8573	31.0132	30.3767	70.1565	49.5398	26.5653	45.2716	-0.775616	0.0454445	0.999941	H2-Ab1	17	34263209	34269418	protein_coding	histocompatibility 2, class II antigen A, beta 1 [Source:MGI Symbol;Acc:MGI:103070]
ENSMUSG00000036867	31.6987	22.3636	38.5024	35.2845	28.8863	34.5837	53.4711	37.0216	41.899	46.0013	31.8865	44.5983	-0.485796	0.0455092	0.999941	Smad6	9	63953076	64022059	protein_coding	SMAD family member 6 [Source:MGI Symbol;Acc:MGI:1336883]
ENSMUSG00000034227	197.126	165.296	131.841	133.297	120.359	115.609	211.746	168.97	181.238	179.582	143.922	185.384	-0.363799	0.0457149	0.999941	Foxj1	11	116330704	116335399	protein_coding	forkhead box J1 [Source:MGI Symbol;Acc:MGI:1347474]
ENSMUSG00000025537	327.883	326.704	309.186	255.813	352.412	282.599	360.395	361.673	372.219	369.78	309.099	366.017	-0.243831	0.0457621	0.999941	Phkg1	5	129863421	129898549	protein_coding	phosphorylase kinase gamma 1 [Source:MGI Symbol;Acc:MGI:97579]
ENSMUSG00000022386	258.542	270.308	252.016	331.283	251.31	291.492	293.022	311.361	360.527	361.818	275.825	331.682	-0.266399	0.0460891	0.999941	Trmu	15	85879312	85897394	protein_coding	tRNA 5-methylaminomethyl-2-thiouridylate methyltransferase [Source:MGI Symbol;Acc:MGI:1919276]
ENSMUSG00000075470	976.715	1234.86	1129.4	1160.47	1271.96	1374.46	919.703	1104	966.601	1040.34	1191.31	1007.66	0.241393	0.0461127	0.999941	Alg10b	15	90224311	90233471	protein_coding	asparagine-linked glycosylation 10B (alpha-1,2-glucosyltransferase) [Source:MGI Symbol;Acc:MGI:2146159]
ENSMUSG00000074141	3.96233	6.80632	2.33348	2.94038	3.8515	0.988107	2.13884	0.949272	0	0	3.48035	0.772029	2.24384	0.0462104	0.999941	Il4i1	7	44816387	44840809	protein_coding	interleukin 4 induced 1 [Source:MGI Symbol;Acc:MGI:109552]
ENSMUSG00000022237	1568.09	1536.28	1307.91	993.848	1052.42	891.272	1104.71	1015.72	714.232	898.794	1224.97	933.365	0.392335	0.0462117	0.999941	Ankrd33b	15	31291478	31367726	protein_coding	ankyrin repeat domain 33B [Source:MGI Symbol;Acc:MGI:1917904]
ENSMUSG00000033777	45.5668	57.3676	56.0035	63.7082	45.2551	48.4172	41.7075	49.3621	33.1295	28.3085	52.7197	38.1269	0.470265	0.046229	0.999941	Tlr13	X	106143204	106160493	protein_coding	toll-like receptor 13 [Source:MGI Symbol;Acc:MGI:3045213]
ENSMUSG00000070637	52.5009	13.6126	61.8372	53.9069	26.9605	29.6432	27.805	8.54345	30.2063	20.3467	39.7436	21.7254	0.87146	0.0463796	0.999941	Srarp	4	141432672	141436105	protein_coding	steroid receptor associated and regulated protein [Source:MGI Symbol;Acc:MGI:2685540]
ENSMUSG00000029414	16.8399	19.4466	17.5011	17.6423	24.0719	11.8573	13.9025	11.3913	10.7184	7.07712	17.8932	10.7723	0.74442	0.0463827	0.999941	Kntc1	5	123749716	123821593	protein_coding	kinetochore associated 1 [Source:MGI Symbol;Acc:MGI:2673709]
ENSMUSG00000029075	11.887	18.4743	11.6674	35.2845	10.5916	23.7146	28.8744	24.6811	33.1295	38.0395	18.6032	31.1811	-0.742278	0.0464453	0.999941	Tnfrsf4	4	156013843	156016612	protein_coding	tumor necrosis factor receptor superfamily, member 4 [Source:MGI Symbol;Acc:MGI:104512]
ENSMUSG00000040732	75.2843	70.0079	50.1698	68.6088	46.218	67.1913	52.4017	41.768	53.5918	37.1549	62.9134	46.2291	0.450808	0.046512	0.999941	Erg	16	95359169	95586593	protein_coding	ETS transcription factor [Source:MGI Symbol;Acc:MGI:95415]
ENSMUSG00000030126	1567.1	1511	1433.92	1347.67	1438.54	1437.7	1318.6	1366	1138.09	1301.31	1455.99	1281	0.184756	0.0465648	0.999941	Tmcc1	6	116018611	116193486	protein_coding	transmembrane and coiled coil domains 1 [Source:MGI Symbol;Acc:MGI:2442368]
ENSMUSG00000099041	0.990583	0.972332	0	5.88076	3.8515	1.97621	0	0.949272	0	0	2.27856	0.237318	2.97004	0.0466539	0.999941	Gm28035	2	30240567	30282148	protein_coding	predicted gene, 28035 [Source:MGI Symbol;Acc:MGI:5547771]
ENSMUSG00000048537	2212.96	2049.68	1289.25	1774.03	2170.32	1791.44	2148.47	2619.99	2079.36	2575.19	1881.28	2355.75	-0.324321	0.0470648	0.999941	Phldb1	9	44686304	44735198	protein_coding	pleckstrin homology like domain, family B, member 1 [Source:MGI Symbol;Acc:MGI:2143230]
ENSMUSG00000029307	67.3597	105.984	87.5054	113.695	130.951	102.763	147.58	112.963	129.595	142.427	101.376	133.141	-0.391041	0.0470707	0.999941	Dmp1	5	104202613	104214102	protein_coding	dentin matrix protein 1 [Source:MGI Symbol;Acc:MGI:94910]
ENSMUSG00000019874	480.433	297.534	625.372	263.654	581.577	301.373	610.64	443.31	749.311	644.018	424.99	611.82	-0.526236	0.0471496	0.999941	Fabp7	10	57784881	57788450	protein_coding	fatty acid binding protein 7, brain [Source:MGI Symbol;Acc:MGI:101916]
ENSMUSG00000039339	0.990583	0	1.16674	0	0	0	1.06942	3.79709	3.89758	0.88464	0.359554	2.41218	-2.74073	0.0472436	0.999941	Mfsd4b2	10	39920382	39926923	protein_coding	major facilitator superfamily domain containing 4B2 [Source:MGI Symbol;Acc:MGI:1919295]
ENSMUSG00000044734	142.644	167.241	175.011	130.357	236.867	191.693	152.927	213.586	274.78	306.97	173.969	237.066	-0.447828	0.0473694	0.999941	Serpinb1a	13	32842092	32851185	protein_coding	serine (or cysteine) peptidase inhibitor, clade B, member 1a [Source:MGI Symbol;Acc:MGI:1913472]
ENSMUSG00000034919	14.8588	18.4743	9.33391	19.6025	12.5174	11.8573	36.3604	19.9347	17.5391	21.2314	14.4407	23.7664	-0.705227	0.047504	0.999941	Ttc22	4	106622432	106640189	protein_coding	tetratricopeptide repeat domain 22 [Source:MGI Symbol;Acc:MGI:3045307]
ENSMUSG00000050121	320.949	437.549	449.194	283.256	267.679	289.515	653.417	320.854	558.329	358.279	341.357	472.72	-0.469549	0.0477198	0.999941	Opalin	19	41062474	41077113	protein_coding	oligodendrocytic myelin paranodal and inner loop protein [Source:MGI Symbol;Acc:MGI:2657025]
ENSMUSG00000048489	8.91525	36.9486	21.0013	9.80126	15.406	2.96432	3.20827	3.79709	6.82077	12.385	15.8395	6.55277	1.2591	0.0478014	0.999941	Depp1	6	116650609	116652794	protein_coding	DEPP1 autophagy regulator [Source:MGI Symbol;Acc:MGI:1918730]
ENSMUSG00000055737	188.211	266.419	238.015	212.687	226.276	267.777	216.023	195.55	177.34	172.505	233.231	190.355	0.294471	0.0479366	0.999941	Ghr	15	3317760	3583492	protein_coding	growth hormone receptor [Source:MGI Symbol;Acc:MGI:95708]
ENSMUSG00000022893	176.324	201.273	173.844	218.568	268.642	260.86	191.427	349.332	287.447	312.278	216.585	285.121	-0.396936	0.0479675	0.999941	Adamts1	16	85793827	85803113	protein_coding	a disintegrin-like and metallopeptidase (reprolysin type) with thrombospondin type 1 motif, 1 [Source:MGI Symbol;Acc:MGI:109249]
ENSMUSG00000078772	2.97175	3.88933	3.50022	3.9205	3.8515	9.88107	0	1.89854	0.974396	2.65392	4.66906	1.38172	1.71595	0.0480108	0.999941	Gm12353	4	19605451	19651130	protein_coding	predicted gene 12353 [Source:MGI Symbol;Acc:MGI:3699710]
ENSMUSG00000026878	4279.32	4764.43	4923.64	4668.34	4856.74	5121.36	3931.2	4408.42	4400.37	4228.58	4768.97	4242.14	0.168777	0.048405	0.999941	Rab14	2	35180205	35201120	protein_coding	RAB14, member RAS oncogene family [Source:MGI Symbol;Acc:MGI:1915615]
ENSMUSG00000038257	341.751	384.071	388.524	324.422	342.784	373.504	289.813	336.992	317.653	282.2	359.176	306.665	0.227342	0.0486321	0.999941	Glra3	8	55940460	56130070	protein_coding	glycine receptor, alpha 3 subunit [Source:MGI Symbol;Acc:MGI:95749]
ENSMUSG00000000340	354.629	437.549	457.362	428.315	429.442	471.327	328.313	402.491	372.219	352.087	429.771	363.778	0.239647	0.0486562	0.999941	Dbt	3	116513070	116549981	protein_coding	dihydrolipoamide branched chain transacylase E2 [Source:MGI Symbol;Acc:MGI:105386]
ENSMUSG00000045180	1683.99	1693.8	2368.48	1647.59	1622.44	1741.04	1470.46	1525.48	1543.44	1470.27	1792.89	1502.41	0.254576	0.048672	0.999941	Shroom2	X	152609509	152769465	protein_coding	shroom family member 2 [Source:MGI Symbol;Acc:MGI:107194]
ENSMUSG00000038239	5.9435	4.86166	19.8346	7.84101	10.5916	10.8692	6.41653	7.59418	0.974396	1.76928	9.99026	4.1886	1.2566	0.0488169	0.999941	Hrc	7	45335290	45338974	protein_coding	histidine rich calcium binding protein [Source:MGI Symbol;Acc:MGI:96226]
ENSMUSG00000038390	3318.45	2845.04	2717.33	2394.45	2461.11	1967.32	3796.45	2651.32	3307.1	3276.71	2617.29	3257.89	-0.31582	0.0488264	0.999941	Gpr162	6	124858444	124863983	protein_coding	G protein-coupled receptor 162 [Source:MGI Symbol;Acc:MGI:1315214]
ENSMUSG00000022177	22.7834	56.3953	43.1693	55.8672	35.6264	47.4291	83.4149	42.7172	81.8493	53.0784	43.5451	65.265	-0.58058	0.0489401	0.999941	Haus4	14	54541785	54554616	protein_coding	HAUS augmin-like complex, subunit 4 [Source:MGI Symbol;Acc:MGI:1261794]
ENSMUSG00000044916	37.6422	58.3399	40.8359	63.7082	53.921	62.2507	70.5819	61.7027	72.1053	78.733	52.783	70.7807	-0.420505	0.0489953	0.999941	1700029I15Rik	2	92382538	92385708	protein_coding	RIKEN cDNA 1700029I15 gene [Source:MGI Symbol;Acc:MGI:1916742]
ENSMUSG00000037944	0	1.94466	2.33348	2.94038	0	3.95243	0	0	0	0	1.86182	0	3.38438	0.0491145	0.999941	Ccr7	11	99144196	99155077	protein_coding	chemokine (C-C motif) receptor 7 [Source:MGI Symbol;Acc:MGI:103011]
ENSMUSG00000031027	35.661	45.6996	35.0022	18.6224	33.7006	38.5362	27.805	20.884	27.2831	15.0389	34.537	22.7527	0.609374	0.0493271	0.999941	Stk33	7	109279223	109439081	protein_coding	serine/threonine kinase 33 [Source:MGI Symbol;Acc:MGI:2152419]
ENSMUSG00000039452	124.814	106.957	109.673	102.913	91.4731	94.8583	135.817	118.659	133.492	129.157	105.115	129.281	-0.298724	0.0493698	0.999941	Snx22	9	66065176	66069719	protein_coding	sorting nexin 22 [Source:MGI Symbol;Acc:MGI:2685966]
ENSMUSG00000071078	24.7646	16.5296	26.835	15.682	5.77725	20.7502	51.3323	19.9347	42.8734	17.6928	18.3898	32.9583	-0.84188	0.0494682	0.999941	Nr2c2ap	8	70131333	70133749	protein_coding	nuclear receptor 2C2-associated protein [Source:MGI Symbol;Acc:MGI:1922942]
ENSMUSG00000020455	436.847	464.775	397.858	411.653	386.113	318.17	510.114	454.701	504.737	451.166	402.569	480.18	-0.253733	0.0495111	0.999941	Trim11	11	58978093	58991458	protein_coding	tripartite motif-containing 11 [Source:MGI Symbol;Acc:MGI:2137355]
ENSMUSG00000026315	92.1243	140.016	120.174	73.5095	109.768	108.692	88.762	85.4345	74.0541	78.733	107.381	81.7459	0.393591	0.0495151	0.999941	Serpinb8	1	107590006	107610484	protein_coding	serine (or cysteine) peptidase inhibitor, clade B, member 8 [Source:MGI Symbol;Acc:MGI:894657]
ENSMUSG00000054604	1505.69	1433.22	1552.93	1352.57	1503.05	1656.07	982.799	1353.66	1406.05	1319	1500.59	1265.38	0.245468	0.0495247	0.999941	Cggbp1	16	64851996	64859507	protein_coding	CGG triplet repeat binding protein 1 [Source:MGI Symbol;Acc:MGI:2146370]
ENSMUSG00000027651	569.585	601.873	592.703	612.579	611.426	639.305	514.392	565.766	501.814	552.015	604.579	533.497	0.180056	0.0496857	0.999941	Rprd1b	2	158028497	158132297	protein_coding	regulation of nuclear pre-mRNA domain containing 1B [Source:MGI Symbol;Acc:MGI:1917720]
ENSMUSG00000050854	148.588	119.597	166.844	167.602	174.28	171.931	168.969	173.717	295.242	188.428	158.14	206.589	-0.386107	0.0496956	0.999941	Tmem125	4	118540941	118544044	protein_coding	transmembrane protein 125 [Source:MGI Symbol;Acc:MGI:1923409]
ENSMUSG00000038612	1477.95	1458.5	1662.6	1355.51	1323.95	1456.47	1250.15	1149.57	1375.85	1288.04	1455.83	1265.9	0.201285	0.0498501	0.999941	Mcl1	3	95658788	95663176	protein_coding	myeloid cell leukemia sequence 1 [Source:MGI Symbol;Acc:MGI:101769]
ENSMUSG00000023951	1160.96	1022.89	1025.56	1129.11	1345.14	1117.55	930.397	1471.37	1650.63	1666.66	1133.54	1429.76	-0.335189	0.0499392	0.999941	Vegfa	17	46016993	46032369	protein_coding	vascular endothelial growth factor A [Source:MGI Symbol;Acc:MGI:103178]
ENSMUSG00000028459	11.887	8.75099	16.3343	11.7615	0.962875	8.89296	3.20827	7.59418	0	3.53856	9.76495	3.58525	1.43345	0.0500398	0.999941	Cd72	4	43446462	43454628	protein_coding	CD72 antigen [Source:MGI Symbol;Acc:MGI:88345]
ENSMUSG00000023964	80.2373	53.4783	77.0048	50.9666	32.7378	53.3578	41.7075	49.3621	31.1807	36.2702	57.9637	39.6301	0.545704	0.05026	0.999941	Calcr	6	3685680	3764714	protein_coding	calcitonin receptor [Source:MGI Symbol;Acc:MGI:101950]
ENSMUSG00000030452	397.224	474.498	438.694	497.904	502.621	547.411	362.534	430.97	402.426	414.896	476.392	402.706	0.242186	0.0508301	0.999941	Nipa2	7	55931287	55962476	protein_coding	non imprinted in Prader-Willi/Angelman syndrome 2 homolog (human) [Source:MGI Symbol;Acc:MGI:1913918]
ENSMUSG00000028630	923.224	912.047	974.227	630.221	707.713	673.889	701.541	657.846	562.227	669.673	803.554	647.821	0.310462	0.050966	0.999941	Dyrk2	10	118855603	118870209	protein_coding	dual-specificity tyrosine-(Y)-phosphorylation regulated kinase 2 [Source:MGI Symbol;Acc:MGI:1330301]
ENSMUSG00000017607	7.92467	10.6957	7.00043	6.86088	2.88863	5.92864	2.13884	1.89854	2.92319	4.4232	6.88315	2.84594	1.25849	0.0512086	0.999941	Tns4	11	99065678	99089306	protein_coding	tensin 4 [Source:MGI Symbol;Acc:MGI:2144377]
ENSMUSG00000025789	95.096	84.5929	56.0035	69.589	69.327	87.9415	57.7488	74.9925	38.9758	53.963	77.0916	56.42	0.452503	0.0512367	0.999941	St8sia2	7	73939119	74013690	protein_coding	ST8 alpha-N-acetyl-neuraminide alpha-2,8-sialyltransferase 2 [Source:MGI Symbol;Acc:MGI:106020]
ENSMUSG00000007603	1241.2	1148.32	1034.9	1283.97	1170.86	1056.29	1345.33	1156.21	1445.03	1434.89	1155.92	1345.37	-0.218723	0.0512939	0.999941	Dus3l	17	56764757	56770093	protein_coding	dihydrouridine synthase 3-like (S. cerevisiae) [Source:MGI Symbol;Acc:MGI:2147092]
ENSMUSG00000070369	5.9435	16.5296	3.50022	19.6025	7.703	5.92864	5.34711	0.949272	4.87198	5.30784	9.86792	4.11905	1.27101	0.0513094	0.999941	Itgad	7	128154376	128223816	protein_coding	integrin, alpha D [Source:MGI Symbol;Acc:MGI:3578624]
ENSMUSG00000030108	173.352	150.711	116.674	153.88	221.461	154.145	189.288	208.84	219.239	203.467	161.704	205.208	-0.341788	0.0514299	0.999941	Slc6a13	6	121300227	121337733	protein_coding	solute carrier family 6 (neurotransmitter transporter, GABA), member 13 [Source:MGI Symbol;Acc:MGI:95629]
ENSMUSG00000048142	8400.15	8099.53	6264.22	7443.08	7045.36	6201.36	9388.46	7932.12	8364.22	8432.39	7242.28	8529.3	-0.235903	0.0516827	0.999941	Nat8l	5	33995984	34005916	protein_coding	N-acetyltransferase 8-like [Source:MGI Symbol;Acc:MGI:2447776]
ENSMUSG00000032852	1.98117	8.75099	5.83369	4.90063	3.8515	6.91675	2.13884	2.84782	0.974396	1.76928	5.37245	1.93258	1.47532	0.0517716	0.999941	Rspo4	2	151842927	151874668	protein_coding	R-spondin 4 [Source:MGI Symbol;Acc:MGI:1924467]
ENSMUSG00000037349	92.1243	94.3162	124.841	120.556	121.322	85.9653	146.511	105.369	156.878	137.119	106.521	136.469	-0.358085	0.0517937	0.999941	Nudt22	19	6993018	6996117	protein_coding	nudix (nucleoside diphosphate linked moiety X)-type motif 22 [Source:MGI Symbol;Acc:MGI:1915573]
ENSMUSG00000043463	649.823	664.103	710.544	694.909	604.686	771.711	479.101	618.925	608.023	613.94	682.629	579.998	0.233972	0.0517956	0.999941	Rab9b	X	136858147	136868755	protein_coding	RAB9B, member RAS oncogene family [Source:MGI Symbol;Acc:MGI:2442454]
ENSMUSG00000026196	11.887	4.86166	11.6674	12.7416	10.5916	17.7859	13.9025	18.9854	21.4367	23.0006	11.5892	19.3313	-0.744612	0.0518488	0.999941	Bard1	1	71027498	71103146	protein_coding	BRCA1 associated RING domain 1 [Source:MGI Symbol;Acc:MGI:1328361]
ENSMUSG00000078746	0.990583	0	0	1.96025	4.81438	0	3.20827	13.2898	0.974396	5.30784	1.2942	5.69508	-2.11757	0.0520754	0.999941	Fam205a4	4	41966058	41971856	protein_coding	family with sequence similarity 205, member A4 [Source:MGI Symbol;Acc:MGI:5434294]
ENSMUSG00000028445	1208.51	982.055	1258.91	974.245	746.228	672.901	1593.44	879.026	1605.8	1180.11	973.809	1314.59	-0.432979	0.0520875	0.999941	Enho	4	41638144	41640324	protein_coding	energy homeostasis associated [Source:MGI Symbol;Acc:MGI:1916888]
ENSMUSG00000022201	5828.59	6139.3	6750.75	6028.76	6162.4	6621.3	4928.97	6004.15	5618.37	5566.16	6255.18	5529.41	0.17778	0.0522217	0.999941	Zfr	15	12117831	12185683	protein_coding	zinc finger RNA binding protein [Source:MGI Symbol;Acc:MGI:1341890]
ENSMUSG00000090173	8.91525	7.77866	12.8341	15.682	20.2204	13.8335	22.4579	22.7825	18.5135	21.2314	13.2107	21.2463	-0.683463	0.0527644	0.999941	Fbxw10	11	62847069	62877465	protein_coding	F-box and WD-40 domain protein 10 [Source:MGI Symbol;Acc:MGI:3052463]
ENSMUSG00000071359	1004.45	1033.59	1137.57	1137.93	1065.9	1115.57	944.3	941.678	1010.45	967.796	1082.5	966.056	0.163861	0.0527836	0.999941	Tbpl1	10	22703879	22731938	protein_coding	TATA box binding protein-like 1 [Source:MGI Symbol;Acc:MGI:1339946]
ENSMUSG00000104043	0.990583	0.972332	1.16674	0.980126	5.77725	1.97621	3.20827	9.49272	5.84638	4.4232	1.97721	5.74264	-1.52814	0.0527978	0.999941	Gm6525	3	84174104	84175132	protein_coding	predicted pseudogene 6525 [Source:MGI Symbol;Acc:MGI:3648757]
ENSMUSG00000022209	0	0	1.16674	0	0.962875	0.988107	2.13884	3.79709	2.92319	1.76928	0.51962	2.6571	-2.39753	0.0528781	0.999941	Dhrs2	14	55222007	55241435	protein_coding	dehydrogenase/reductase member 2 [Source:MGI Symbol;Acc:MGI:1918662]
ENSMUSG00000035172	277.363	234.332	179.678	350.885	270.568	226.276	256.661	281.934	399.502	424.627	256.517	340.681	-0.40922	0.0531176	0.999941	Plekhh3	11	101162679	101171351	protein_coding	pleckstrin homology domain containing, family H (with MyTH4 domain) member 3 [Source:MGI Symbol;Acc:MGI:2384950]
ENSMUSG00000026241	87.1713	41.8103	51.3365	69.589	65.4755	43.4767	89.8315	63.6012	95.4908	84.0408	59.8099	83.2411	-0.47488	0.0532636	0.999941	Nppc	1	86666291	86670571	protein_coding	natriuretic peptide type C [Source:MGI Symbol;Acc:MGI:97369]
ENSMUSG00000053470	755.815	796.34	812.05	842.908	931.1	1071.11	660.903	828.715	665.513	746.636	868.22	725.442	0.259015	0.0532764	0.999941	Kdm3a	6	71588972	71632990	protein_coding	lysine (K)-specific demethylase 3A [Source:MGI Symbol;Acc:MGI:98847]
ENSMUSG00000032818	12.8776	6.80632	11.6674	43.1256	10.5916	18.774	5.34711	6.6449	10.7184	10.6157	17.3071	8.33151	1.0507	0.053289	0.999941	Loxhd1	18	77281958	77442341	protein_coding	lipoxygenase homology domains 1 [Source:MGI Symbol;Acc:MGI:1914609]
ENSMUSG00000024795	24.7646	18.4743	12.8341	23.523	16.3689	17.7859	6.41653	16.1376	9.74396	13.2696	18.9585	11.3919	0.727785	0.05331	0.999941	Kif20b	19	34922361	34975745	protein_coding	kinesin family member 20B [Source:MGI Symbol;Acc:MGI:2444576]
ENSMUSG00000006469	2.97175	1.94466	1.16674	3.9205	0	2.96432	4.27769	7.59418	11.6928	1.76928	2.16133	6.33348	-1.54159	0.0533981	0.999941	Slc34a3	2	25228898	25234364	protein_coding	solute carrier family 34 (sodium phosphate), member 3 [Source:MGI Symbol;Acc:MGI:2159410]
ENSMUSG00000053268	1.98117	1.94466	2.33348	0.980126	5.77725	2.96432	3.20827	13.2898	1.94879	10.6157	2.6635	7.26564	-1.45316	0.0535639	0.999941	Dspp	5	104170712	104180127	protein_coding	dentin sialophosphoprotein [Source:MGI Symbol;Acc:MGI:109172]
ENSMUSG00000068259	5.9435	3.88933	1.16674	8.82114	2.88863	4.94053	1.06942	2.84782	0.974396	0.88464	4.60831	1.44407	1.68189	0.0535664	0.999941	Olfr461	6	40542171	40555050	protein_coding	olfactory receptor 461 [Source:MGI Symbol;Acc:MGI:3030295]
ENSMUSG00000015806	2594.34	2103.15	2611.16	1858.32	2093.29	1800.33	2669.28	2107.38	3305.15	2740.61	2176.77	2705.61	-0.313893	0.0538089	0.999941	Qdpr	5	45434021	45450236	protein_coding	quinoid dihydropteridine reductase [Source:MGI Symbol;Acc:MGI:97836]
ENSMUSG00000043323	1035.16	1146.38	877.388	1095.78	1030.28	908.07	1187.06	1191.34	1129.33	1179.23	1015.51	1171.74	-0.205957	0.0538799	0.999941	Fbrsl1	5	110361754	110448503	protein_coding	fibrosin-like 1 [Source:MGI Symbol;Acc:MGI:1920907]
ENSMUSG00000030382	5.9435	4.86166	10.5006	12.7416	9.62875	5.92864	12.8331	16.1376	16.5647	12.385	8.26747	14.4801	-0.813724	0.0539349	0.999941	Slc27a5	7	12988346	12998192	protein_coding	solute carrier family 27 (fatty acid transporter), member 5 [Source:MGI Symbol;Acc:MGI:1347100]
ENSMUSG00000075520	0	0.972332	0	0	0.962875	0.988107	1.06942	1.89854	1.94879	6.19248	0.487219	2.77731	-2.48293	0.0539699	0.999941	Malrd1	2	15526479	16255555	protein_coding	MAM and LDL receptor class A domain containing 1 [Source:MGI Symbol;Acc:MGI:1928271]
ENSMUSG00000015090	13189.6	9406.34	11501.7	12032	7517.17	8044.18	17625.1	8751.34	16615.4	12340.7	10281.8	13833.2	-0.428023	0.0542374	0.999941	Ptgds	2	25466709	25470046	protein_coding	prostaglandin D2 synthase (brain) [Source:MGI Symbol;Acc:MGI:99261]
ENSMUSG00000070526	1.98117	1.94466	0	1.96025	0	0	2.13884	4.74636	3.89758	4.4232	0.981014	3.8015	-1.93734	0.0543487	0.999941	Peg12	7	62461871	62464510	protein_coding	paternally expressed 12 [Source:MGI Symbol;Acc:MGI:1351637]
ENSMUSG00000040022	1043.08	1206.66	1069.9	1003.65	1171.82	1142.25	885.482	1103.05	919.83	926.218	1106.23	958.646	0.206489	0.0544663	0.999941	Rab11fip2	19	59902884	59943654	protein_coding	RAB11 family interacting protein 2 (class I) [Source:MGI Symbol;Acc:MGI:1922248]
ENSMUSG00000025652	0	0	1.16674	0	0	0	3.20827	2.84782	2.92319	0	0.194456	2.24482	-3.10869	0.0545001	0.999941	Tmem89	9	108914619	108915563	protein_coding	transmembrane protein 89 [Source:MGI Symbol;Acc:MGI:1916634]
ENSMUSG00000040640	2423.96	2879.07	3051.02	2002.4	2299.35	2050.32	2318.51	2025.75	1771.45	1872.78	2451.02	1997.12	0.295437	0.0545497	0.999941	Erc2	14	27622428	28478537	protein_coding	ELKS/RAB6-interacting/CAST family member 2 [Source:MGI Symbol;Acc:MGI:1098749]
ENSMUSG00000051022	254.58	305.312	313.853	402.832	337.006	321.135	342.215	382.557	405.349	437.012	322.453	391.783	-0.281561	0.0546912	0.999941	Hs3st1	5	39613935	39755475	protein_coding	heparan sulfate (glucosamine) 3-O-sulfotransferase 1 [Source:MGI Symbol;Acc:MGI:1201606]
ENSMUSG00000057411	1021.29	819.676	1039.56	930.14	810.741	736.14	1349.61	726.193	1436.26	1102.26	892.925	1153.58	-0.369499	0.0548295	0.999941	Fam173a	17	25790508	25792284	protein_coding	family with sequence similarity 173, member A [Source:MGI Symbol;Acc:MGI:2384888]
ENSMUSG00000037443	315.006	328.648	346.521	394.011	331.229	300.385	334.729	243.014	271.857	274.238	335.967	280.959	0.259216	0.0549176	0.999941	Cep85	4	134129858	134187112	protein_coding	centrosomal protein 85 [Source:MGI Symbol;Acc:MGI:1917262]
ENSMUSG00000022195	665.672	701.051	859.887	748.816	828.073	815.188	627.751	714.802	652.845	657.288	769.781	663.171	0.214396	0.0549619	0.999941	6030458C11Rik	15	12808177	12824649	protein_coding	RIKEN cDNA 6030458C11 gene [Source:MGI Symbol;Acc:MGI:1925127]
ENSMUSG00000021624	33.6798	36.9486	63.0039	49.9864	64.5126	63.2388	43.8463	34.1738	33.1295	35.3856	51.895	36.6338	0.503027	0.0550667	0.999941	Cd180	13	102693558	102739629	protein_coding	CD180 antigen [Source:MGI Symbol;Acc:MGI:1194924]
ENSMUSG00000073982	487.367	421.992	478.363	432.236	322.563	336.944	579.627	392.049	595.356	513.091	413.244	520.031	-0.331789	0.0550825	0.999941	Rhog	7	102239123	102256054	protein_coding	ras homolog family member G [Source:MGI Symbol;Acc:MGI:1928370]
ENSMUSG00000029648	904.403	719.526	561.201	703.731	1167.97	1240.07	520.809	887.569	527.148	621.902	882.817	639.357	0.465561	0.0551653	0.999941	Flt1	5	147561604	147726011	protein_coding	FMS-like tyrosine kinase 1 [Source:MGI Symbol;Acc:MGI:95558]
ENSMUSG00000004791	23.774	51.5336	39.6691	40.1852	31.7749	36.56	63.0959	29.4274	67.2333	59.2709	37.2495	54.7569	-0.554981	0.0551965	0.999941	Pgf	12	85166635	85177790	protein_coding	placental growth factor [Source:MGI Symbol;Acc:MGI:105095]
ENSMUSG00000040710	352.648	332.538	351.188	328.342	352.412	454.529	230.995	339.839	282.575	326.432	361.943	294.96	0.293791	0.0552521	0.999941	St8sia4	1	95587682	95667571	protein_coding	ST8 alpha-N-acetyl-neuraminide alpha-2,8-sialyltransferase 4 [Source:MGI Symbol;Acc:MGI:106018]
ENSMUSG00000027584	1038.13	985.945	1024.4	994.828	854.07	972.297	945.369	772.707	879.88	811.215	978.278	852.293	0.199243	0.0552856	0.999941	Oprl1	2	181715016	181720985	protein_coding	opioid receptor-like 1 [Source:MGI Symbol;Acc:MGI:97440]
ENSMUSG00000019790	2026.73	2350.13	2377.81	2194.5	2259.87	2517.7	1829.78	2334.26	1727.6	1950.63	2287.79	1960.57	0.222509	0.0554478	0.999941	Stxbp5	10	9755547	9901079	protein_coding	syntaxin binding protein 5 (tomosyn) [Source:MGI Symbol;Acc:MGI:1926058]
ENSMUSG00000074344	2.97175	0.972332	0	7.84101	0.962875	5.92864	0	0	0.974396	0.88464	3.11277	0.464759	2.70441	0.0555744	0.999941	Tmigd3	3	105870903	105924042	protein_coding	transmembrane and immunoglobulin domain containing 3 [Source:MGI Symbol;Acc:MGI:5604098]
ENSMUSG00000081984	11.887	19.4466	14.0009	4.90063	9.62875	4.94053	29.9438	9.49272	20.4623	20.3467	10.8007	20.0614	-0.892448	0.0556344	0.999941	Dnajb3	1	88204732	88205782	protein_coding	DnaJ heat shock protein family (Hsp40) member B3 [Source:MGI Symbol;Acc:MGI:1306822]
ENSMUSG00000030244	2.97175	0	7.00043	4.90063	1.92575	1.97621	0	1.89854	0	0	3.12913	0.474636	2.67665	0.0556763	0.999941	Gys2	6	142422613	142473109	protein_coding	glycogen synthase 2 [Source:MGI Symbol;Acc:MGI:2385254]
ENSMUSG00000074863	144.625	155.573	190.178	194.065	156.949	186.752	124.053	137.644	158.827	138.888	171.357	139.853	0.291056	0.0557241	0.999941	Platr25	13	62671784	62760709	protein_coding	pluripotency associated transcript 25 [Source:MGI Symbol;Acc:MGI:3645613]
ENSMUSG00000021945	1680.03	1678.24	1709.27	2029.84	1980.63	2354.66	1335.71	1841.59	1558.06	1589.7	1905.45	1581.26	0.26896	0.0563536	0.999941	Zmym2	14	56886653	56962701	protein_coding	zinc finger, MYM-type 2 [Source:MGI Symbol;Acc:MGI:1923257]
ENSMUSG00000072941	189.201	200.3	262.516	174.462	181.021	154.145	260.939	199.347	249.445	258.315	193.608	242.012	-0.324032	0.0564246	0.999941	Sod3	5	52363791	52371418	protein_coding	superoxide dismutase 3, extracellular [Source:MGI Symbol;Acc:MGI:103181]
ENSMUSG00000029684	2499.24	2712.81	2459.49	2507.16	2541.99	2825.99	2284.29	2519.37	2221.62	2219.56	2591.11	2311.21	0.165025	0.0565859	0.999941	Wasl	6	24613805	24665009	protein_coding	Wiskott-Aldrich syndrome-like (human) [Source:MGI Symbol;Acc:MGI:1920428]
ENSMUSG00000031290	565.623	679.66	721.045	830.167	826.147	915.975	534.711	617.027	711.309	601.555	756.436	616.151	0.295837	0.0567578	0.999941	Lrch2	X	147470375	147554081	protein_coding	leucine-rich repeats and calponin homology (CH) domain containing 2 [Source:MGI Symbol;Acc:MGI:2147870]
ENSMUSG00000046561	50.5198	41.8103	47.8363	26.4634	33.7006	28.6551	36.3604	20.884	20.4623	25.6546	38.1642	25.8403	0.565034	0.0567788	0.999941	Arsj	3	126363684	126440375	protein_coding	arylsulfatase J [Source:MGI Symbol;Acc:MGI:2443513]
ENSMUSG00000046186	56.4633	57.3676	95.6726	47.0461	59.6983	76.0842	43.8463	48.4129	43.8478	53.963	65.3887	47.5175	0.453216	0.0568464	0.999941	Cd109	9	78615546	78716253	protein_coding	CD109 antigen [Source:MGI Symbol;Acc:MGI:2445221]
ENSMUSG00000024797	37.6422	35.9763	24.5015	33.3243	31.7749	48.4172	47.0546	49.3621	52.6174	44.232	35.2727	48.3165	-0.448578	0.0569825	0.999941	Vps51	19	6067842	6080324	protein_coding	VPS51 GARP complex subunit [Source:MGI Symbol;Acc:MGI:1915755]
ENSMUSG00000049562	61.4162	64.1739	65.3374	59.7877	73.1785	73.1199	73.7901	80.6881	80.8749	98.195	66.1689	83.387	-0.336561	0.0570471	0.999941	Ap5b1	19	5568074	5571261	protein_coding	adaptor-related protein complex 5, beta 1 subunit [Source:MGI Symbol;Acc:MGI:2685808]
ENSMUSG00000007837	81.2278	92.3715	87.5054	90.1716	68.3641	55.334	139.025	77.8403	110.107	95.5411	79.1624	105.628	-0.414192	0.057117	0.999941	Prrg2	7	45053584	45062677	protein_coding	proline-rich Gla (G-carboxyglutamic acid) polypeptide 2 [Source:MGI Symbol;Acc:MGI:1929596]
ENSMUSG00000057228	3.96233	1.94466	4.66696	6.86088	2.88863	3.95243	1.06942	0	0.974396	2.65392	4.04598	1.17443	1.75595	0.0572024	0.999941	Aadat	8	60505932	60545677	protein_coding	aminoadipate aminotransferase [Source:MGI Symbol;Acc:MGI:1345167]
ENSMUSG00000029055	1804.84	1392.38	1312.58	1774.03	2147.21	1716.34	1623.38	2451.97	2059.87	2335.45	1691.23	2117.67	-0.324397	0.0572235	0.999941	Plch2	4	154983115	155056784	protein_coding	phospholipase C, eta 2 [Source:MGI Symbol;Acc:MGI:2443078]
ENSMUSG00000023495	3005.43	2565.98	2114.13	2440.51	2143.36	1642.23	3424.29	2215.6	3298.33	2863.58	2318.61	2950.45	-0.347559	0.057253	0.999941	Pcbp4	9	106453291	106464012	protein_coding	poly(rC) binding protein 4 [Source:MGI Symbol;Acc:MGI:1890471]
ENSMUSG00000029276	156.512	184.743	200.679	254.833	209.907	259.872	152.927	191.753	163.699	162.774	211.091	167.788	0.330961	0.0573715	0.999941	Glmn	5	107548967	107597888	protein_coding	glomulin, FKBP associated protein [Source:MGI Symbol;Acc:MGI:2141180]
ENSMUSG00000018417	629.02	737.028	586.87	610.619	761.634	714.401	638.445	597.092	527.148	526.361	673.262	572.262	0.235642	0.0573767	0.999941	Myo1b	1	51749765	51916071	protein_coding	myosin IB [Source:MGI Symbol;Acc:MGI:107752]
ENSMUSG00000031631	555.717	630.071	611.371	597.877	610.463	726.259	526.156	601.839	481.352	525.476	621.96	533.706	0.220708	0.0574001	0.999941	Cfap97	8	46151771	46195590	protein_coding	cilia and flagella associated protein 97 [Source:MGI Symbol;Acc:MGI:1914006]
ENSMUSG00000052459	9188.65	9512.32	11757.2	9671.88	9544.98	10109.3	7968.27	9258.25	8933.26	8726.97	9964.06	8721.69	0.192023	0.0576163	0.999941	Atp6v1a	16	44085402	44139705	protein_coding	ATPase, H+ transporting, lysosomal V1 subunit A [Source:MGI Symbol;Acc:MGI:1201780]
ENSMUSG00000020758	297.175	243.083	232.181	199.946	295.603	206.514	289.813	303.767	292.319	314.047	245.75	299.987	-0.287604	0.057632	0.999941	Itgb4	11	115974709	116008412	protein_coding	integrin beta 4 [Source:MGI Symbol;Acc:MGI:96613]
ENSMUSG00000071748	32.6893	41.8103	29.1685	45.0858	58.7354	54.3459	28.8744	37.9709	27.2831	28.3085	43.6392	30.6092	0.515618	0.0577661	0.999941	Gm14698	X	68821093	68825318	protein_coding	predicted gene 14698 [Source:MGI Symbol;Acc:MGI:3709613]
ENSMUSG00000027660	1223.37	1450.72	1626.43	1206.54	1476.09	1394.22	986.007	1347.02	1119.58	1237.61	1396.23	1172.55	0.251279	0.0577772	0.999941	Skil	3	31095058	31122577	protein_coding	SKI-like [Source:MGI Symbol;Acc:MGI:106203]
ENSMUSG00000021556	306.09	369.486	373.356	345.985	404.408	317.182	288.744	323.702	263.087	314.932	352.751	297.616	0.244352	0.057823	0.999941	Golm1	13	59634626	59675811	protein_coding	golgi membrane protein 1 [Source:MGI Symbol;Acc:MGI:1917329]
ENSMUSG00000031344	161.465	200.3	170.344	153.88	115.545	206.514	152.927	135.746	112.056	123.85	168.008	131.145	0.358389	0.0578379	0.999941	Gabrq	X	72825178	72842602	protein_coding	gamma-aminobutyric acid (GABA) A receptor, subunit theta [Source:MGI Symbol;Acc:MGI:1888498]
ENSMUSG00000015850	156.512	128.348	142.342	164.661	213.758	159.085	164.691	255.354	173.443	232.66	160.784	206.537	-0.36192	0.0578602	0.999941	Adamtsl4	3	95676201	95687917	protein_coding	ADAMTS-like 4 [Source:MGI Symbol;Acc:MGI:2389008]
ENSMUSG00000030805	768.693	610.624	820.217	607.678	640.312	539.506	866.232	663.541	921.779	802.369	664.505	813.48	-0.29222	0.0578955	0.999941	Stx4a	7	127824294	127849019	protein_coding	syntaxin 4A (placental) [Source:MGI Symbol;Acc:MGI:893577]
ENSMUSG00000054057	99.0583	85.5652	86.3387	66.6486	70.2899	40.5124	126.192	76.891	133.492	84.9254	74.7355	105.375	-0.494867	0.0582242	0.999941	A930004D18Rik	2	18025193	18037737	protein_coding	RIKEN cDNA A930004D18 gene [Source:MGI Symbol;Acc:MGI:1925190]
ENSMUSG00000093931	4.95292	2.917	3.50022	0	0.962875	4.94053	0	0.949272	0	0.88464	2.87892	0.458478	2.57961	0.0582595	0.999941	Amy2a3	3	113312455	113324052	protein_coding	amylase 2a3 [Source:MGI Symbol;Acc:MGI:3714985]
ENSMUSG00000047181	1479.93	1231.94	1044.23	1346.69	1193	929.809	1549.59	1226.46	1709.09	1426.04	1204.27	1477.8	-0.295013	0.0583339	0.999941	Samd14	11	95009879	95026087	protein_coding	sterile alpha motif domain containing 14 [Source:MGI Symbol;Acc:MGI:2384945]
ENSMUSG00000001768	754.825	644.656	698.877	566.513	474.697	580.019	575.349	467.042	456.017	532.553	619.931	507.74	0.28786	0.0583685	0.999941	Rin2	2	145675215	145887616	protein_coding	Ras and Rab interactor 2 [Source:MGI Symbol;Acc:MGI:1921280]
ENSMUSG00000026014	906.384	1019.98	921.724	883.094	1175.67	1158.06	642.723	1053.69	649.922	881.986	1010.82	807.081	0.324409	0.0584285	0.999941	Raph1	1	60482292	60567104	protein_coding	Ras association (RalGDS/AF-6) and pleckstrin homology domains 1 [Source:MGI Symbol;Acc:MGI:1924550]
ENSMUSG00000025478	879.638	857.597	724.545	1077.16	1026.42	893.249	976.383	1134.38	1065.02	1145.61	909.769	1080.35	-0.24766	0.058617	0.999941	Dpysl4	7	139086001	139102704	protein_coding	dihydropyrimidinase-like 4 [Source:MGI Symbol;Acc:MGI:1349764]
ENSMUSG00000055319	829.118	738	829.551	820.366	711.565	905.106	642.723	746.128	703.514	708.597	805.618	700.24	0.20162	0.0586726	0.999941	Sec23ip	7	128744943	128784836	protein_coding	Sec23 interacting protein [Source:MGI Symbol;Acc:MGI:2450915]
ENSMUSG00000047497	2.97175	5.83399	5.83369	2.94038	7.703	5.92864	2.13884	18.9854	12.6672	10.6157	5.20191	11.1018	-1.10269	0.0589055	0.999941	Adamts12	15	11064790	11349231	protein_coding	a disintegrin-like and metallopeptidase (reprolysin type) with thrombospondin type 1 motif, 12 [Source:MGI Symbol;Acc:MGI:2146046]
ENSMUSG00000039458	777.608	873.154	701.21	722.353	748.154	815.188	658.764	767.012	597.305	636.941	772.945	665.005	0.217316	0.0589284	0.999941	Mtmr12	15	12205028	12274496	protein_coding	myotubularin related protein 12 [Source:MGI Symbol;Acc:MGI:2443034]
ENSMUSG00000025784	39.6233	36.9486	31.5019	38.2249	25.9976	33.5956	38.4992	30.3767	78.9261	53.0784	34.3153	50.2201	-0.550056	0.0589361	0.999941	Clec3b	9	123150946	123157432	protein_coding	C-type lectin domain family 3, member b [Source:MGI Symbol;Acc:MGI:104540]
ENSMUSG00000045036	44.5763	70.9802	77.0048	29.4038	24.0719	44.4648	42.7769	26.5796	26.3087	26.5392	48.417	30.5511	0.664422	0.0590833	0.999941	Tmem232	17	65255999	65540782	protein_coding	transmembrane protein 232 [Source:MGI Symbol;Acc:MGI:2685786]
ENSMUSG00000023938	517.085	506.585	484.197	514.566	557.505	408.088	534.711	563.868	583.663	645.787	498.004	582.007	-0.225275	0.0591674	0.999941	Aars2	17	45506841	45520843	protein_coding	alanyl-tRNA synthetase 2, mitochondrial [Source:MGI Symbol;Acc:MGI:2681839]
ENSMUSG00000040929	968.791	1152.21	1100.23	896.815	1112.12	1135.33	771.053	1095.46	825.314	867.832	1060.92	889.915	0.253204	0.0592287	0.999941	Rfx3	19	27761721	28011166	protein_coding	regulatory factor X, 3 (influences HLA class II expression) [Source:MGI Symbol;Acc:MGI:106582]
ENSMUSG00000020018	113.917	56.3953	60.6704	44.1057	27.9234	15.8097	163.622	48.4129	102.312	69.8866	53.1369	96.0582	-0.853275	0.0592618	0.999941	Snrpf	10	93583029	93589706	protein_coding	small nuclear ribonucleoprotein polypeptide F [Source:MGI Symbol;Acc:MGI:1917128]
ENSMUSG00000029385	825.156	756.474	836.552	895.835	933.989	1048.38	598.876	804.033	749.311	807.676	882.731	739.974	0.253954	0.0593095	0.999941	Ccng2	5	93267257	93276231	protein_coding	cyclin G2 [Source:MGI Symbol;Acc:MGI:1095734]
ENSMUSG00000022811	1646.35	1996.2	1687.1	1874	2185.73	2188.66	1483.29	1882.41	1504.47	1648.08	1929.67	1629.56	0.243889	0.0593233	0.999941	Zfp148	16	33380836	33504363	protein_coding	zinc finger protein 148 [Source:MGI Symbol;Acc:MGI:1332234]
ENSMUSG00000046178	646.851	847.873	831.885	732.154	655.718	867.558	686.569	583.802	671.359	640.479	763.673	645.552	0.242394	0.0593894	0.999941	Nxph1	6	8948431	9249032	protein_coding	neurexophilin 1 [Source:MGI Symbol;Acc:MGI:107492]
ENSMUSG00000025905	243.684	247.945	245.015	273.455	233.979	322.123	210.676	240.166	219.239	203.467	261.033	218.387	0.257718	0.0594384	0.999941	Oprk1	1	5588466	5606131	protein_coding	opioid receptor, kappa 1 [Source:MGI Symbol;Acc:MGI:97439]
ENSMUSG00000025184	231.797	204.19	222.847	218.568	252.273	219.36	171.108	199.347	210.47	180.467	224.839	190.348	0.239848	0.0594507	0.999941	R3hcc1l	19	42518759	42592343	protein_coding	R3H domain and coiled-coil containing 1 like [Source:MGI Symbol;Acc:MGI:1196316]
ENSMUSG00000025340	691.427	688.411	698.877	687.068	628.757	689.699	549.683	582.853	677.205	583.862	680.707	598.401	0.185461	0.0595802	0.999941	Rabgef1	5	130171798	130214342	protein_coding	RAB guanine nucleotide exchange factor (GEF) 1 [Source:MGI Symbol;Acc:MGI:1929459]
ENSMUSG00000095552	0	0.972332	0	0	0	0	1.06942	6.6449	0	1.76928	0.162055	2.3709	-3.20011	0.0596177	0.999941	CR974586.2	JH584293.1	140956	142665	protein_coding
ENSMUSG00000023153	15.8493	22.3636	11.6674	27.4435	12.5174	12.8454	22.4579	18.9854	42.8734	26.5392	17.1144	27.714	-0.691181	0.0596614	0.999941	Tmem52	4	155469114	155470858	protein_coding	transmembrane protein 52 [Source:MGI Symbol;Acc:MGI:1916921]
ENSMUSG00000041534	9.90583	3.88933	4.66696	1.96025	3.8515	4.94053	1.06942	2.84782	0.974396	1.76928	4.86907	1.66523	1.53409	0.059662	0.999941	Rbp3	14	33954003	33964216	protein_coding	retinol binding protein 3, interstitial [Source:MGI Symbol;Acc:MGI:97878]
ENSMUSG00000026721	2307.07	2649.6	2722	2531.67	2819.3	3285.46	1997.68	2739.6	2199.21	2201.87	2719.18	2284.59	0.251133	0.0596754	0.999941	Rabgap1l	1	160219174	160793211	protein_coding	RAB GTPase activating protein 1-like [Source:MGI Symbol;Acc:MGI:1352507]
ENSMUSG00000024188	2231.78	2075.93	2108.3	2021.02	2346.53	2472.24	1695.03	2114.03	1928.33	1969.21	2209.3	1926.65	0.19733	0.0597122	0.999941	Luc7l	17	26252910	26285504	protein_coding	Luc7-like [Source:MGI Symbol;Acc:MGI:1914228]
ENSMUSG00000031506	16.8399	13.6126	14.0009	8.82114	9.62875	13.8335	31.0132	16.1376	18.5135	16.8082	12.7895	20.6181	-0.682956	0.0597284	0.999941	Ptpn7	1	135132700	135145317	protein_coding	protein tyrosine phosphatase, non-receptor type 7 [Source:MGI Symbol;Acc:MGI:2156893]
ENSMUSG00000089844	0	0	0	0.980126	0	0	1.06942	1.89854	3.89758	0.88464	0.163354	1.93755	-2.904	0.0598093	0.999941	A530032D15Rik	1	85083069	85109853	protein_coding	RIKEN cDNA A530032D15Rik gene [Source:MGI Symbol;Acc:MGI:3037746]
ENSMUSG00000021967	404.158	344.206	422.359	335.203	302.343	249.991	504.767	318.955	539.815	401.627	343.043	441.291	-0.36351	0.0600224	0.999941	Mrpl57	14	57826234	57829296	protein_coding	mitochondrial ribosomal protein L57 [Source:MGI Symbol;Acc:MGI:1915090]
ENSMUSG00000034714	638.926	679.66	485.363	731.174	798.223	716.378	727.207	874.28	773.671	906.756	674.954	820.478	-0.281293	0.0601113	0.999941	Ttyh2	11	114675431	114720977	protein_coding	tweety family member 2 [Source:MGI Symbol;Acc:MGI:2157091]
ENSMUSG00000055491	506.188	499.779	369.856	380.289	424.628	378.445	344.354	392.049	320.576	362.702	426.531	354.921	0.265439	0.060128	0.999941	Pprc1	19	46044886	46072915	protein_coding	peroxisome proliferative activated receptor, gamma, coactivator-related 1 [Source:MGI Symbol;Acc:MGI:2385096]
ENSMUSG00000025935	554.727	649.518	715.211	659.625	679.79	711.437	521.878	599.94	607.049	559.977	661.718	572.211	0.208992	0.0601637	0.999941	Tram1	1	13564698	13589910	protein_coding	translocating chain-associating membrane protein 1 [Source:MGI Symbol;Acc:MGI:1919515]
ENSMUSG00000062116	210.004	185.715	296.352	199.946	167.54	184.776	151.858	126.253	168.571	195.505	207.389	160.547	0.366134	0.0601673	0.999941	Zfp954	7	7114690	7121488	protein_coding	zinc finger protein 954 [Source:MGI Symbol;Acc:MGI:1917764]
ENSMUSG00000034723	4892.49	5870.94	5529.18	5674.93	5530.75	5993.86	4920.41	5178.28	4959.68	4926.56	5582.02	4996.23	0.159952	0.0602801	0.999941	Tmx4	2	134594185	134644145	protein_coding	thioredoxin-related transmembrane protein 4 [Source:MGI Symbol;Acc:MGI:106558]
ENSMUSG00000002345	306.09	259.613	332.521	356.766	326.415	380.421	344.354	367.368	461.864	404.281	326.971	394.467	-0.271382	0.0603681	0.999941	Borcs8	8	70139499	70147319	protein_coding	BLOC-1 related complex subunit 8 [Source:MGI Symbol;Acc:MGI:1919618]
ENSMUSG00000019802	1505.69	1634.49	1734.94	1741.68	1841.98	1834.91	1413.78	1707.74	1339.79	1495.93	1715.62	1489.31	0.203921	0.0605335	0.999941	Sec63	10	42761496	42832514	protein_coding	SEC63-like (S. cerevisiae) [Source:MGI Symbol;Acc:MGI:2155302]
ENSMUSG00000069833	546.802	565.897	225.181	411.653	766.449	579.031	309.063	507.861	242.625	354.741	515.835	353.572	0.545204	0.0606717	0.999941	Ahnak	19	8989284	9076919	protein_coding	AHNAK nucleoprotein (desmoyokin) [Source:MGI Symbol;Acc:MGI:1316648]
ENSMUSG00000021360	423.97	358.79	441.027	268.555	387.076	256.908	342.215	266.745	233.855	265.392	356.054	277.052	0.362079	0.0606769	0.999941	Gcnt2	13	40859754	40960892	protein_coding	glucosaminyl (N-acetyl) transferase 2, I-branching enzyme [Source:MGI Symbol;Acc:MGI:1100870]
ENSMUSG00000036473	1728.57	1924.24	2025.46	1513.31	1676.37	1837.88	1577.4	1703.94	1341.74	1495.04	1784.31	1529.53	0.222091	0.0607212	0.999941	Tbc1d24	17	24175431	24209387	protein_coding	TBC1 domain family, member 24 [Source:MGI Symbol;Acc:MGI:2443456]
ENSMUSG00000022601	958.885	967.47	864.554	1062.46	1082.27	1182.76	622.404	980.598	825.314	924.449	1019.73	838.191	0.282476	0.0608513	0.999941	Zbtb11	16	55973883	56008913	protein_coding	zinc finger and BTB domain containing 11 [Source:MGI Symbol;Acc:MGI:2443876]
ENSMUSG00000022510	20.8023	22.3636	12.8341	17.6423	24.0719	13.8335	10.6942	28.4782	40.9246	41.5781	18.5913	30.4188	-0.71269	0.0609021	0.999941	Trp63	16	25683763	25892102	protein_coding	transformation related protein 63 [Source:MGI Symbol;Acc:MGI:1330810]
ENSMUSG00000040564	11.887	15.5573	23.3348	17.6423	14.4431	7.90486	32.0827	17.0869	24.3599	22.116	15.1282	23.9114	-0.664345	0.0611758	0.999941	Apoc1	7	19689481	19692660	protein_coding	apolipoprotein C-I [Source:MGI Symbol;Acc:MGI:88053]
ENSMUSG00000027845	106.983	106.957	68.8376	113.695	88.5845	97.8226	125.122	129.101	108.158	125.619	97.1465	122	-0.325369	0.0612621	0.999941	Dclre1b	3	103800605	103809444	protein_coding	DNA cross-link repair 1B [Source:MGI Symbol;Acc:MGI:2156057]
ENSMUSG00000026822	20.8023	29.17	271.85	159.761	56.8096	73.1199	19.2496	11.3913	84.7725	25.6546	101.919	35.267	1.53004	0.0614175	0.999941	Lcn2	2	32384633	32388252	protein_coding	lipocalin 2 [Source:MGI Symbol;Acc:MGI:96757]
ENSMUSG00000068270	71.322	90.4269	79.3382	70.5691	115.545	134.383	67.3736	77.8403	48.7198	78.733	93.5973	68.1667	0.457165	0.061529	0.999941	Shroom4	X	6399854	6637448	protein_coding	shroom family member 4 [Source:MGI Symbol;Acc:MGI:2685570]
ENSMUSG00000026322	86.1808	51.5336	73.5045	48.0262	62.5869	80.0367	54.5405	56.0071	50.6686	34.501	66.9781	48.9293	0.455184	0.0616635	0.999941	Htr4	18	62324204	62467802	protein_coding	5 hydroxytryptamine (serotonin) receptor 4 [Source:MGI Symbol;Acc:MGI:109246]
ENSMUSG00000052407	29.7175	34.0316	18.6678	20.5826	19.2575	17.7859	38.4992	54.1085	23.3855	27.4238	23.3405	35.8543	-0.615287	0.061727	0.999941	Ccdc171	4	83525545	83864670	protein_coding	coiled-coil domain containing 171 [Source:MGI Symbol;Acc:MGI:1922152]
ENSMUSG00000041992	2017.82	2259.7	2136.3	1600.55	2223.28	2004.87	1623.38	2119.72	1382.67	1610.93	2040.42	1684.18	0.276742	0.0618546	0.999941	Rapgef5	12	117516479	117759737	protein_coding	Rap guanine nucleotide exchange factor (GEF) 5 [Source:MGI Symbol;Acc:MGI:2444365]
ENSMUSG00000035245	419.017	421.02	329.02	411.653	544.987	565.197	276.98	409.136	338.115	392.78	448.482	354.253	0.340086	0.0618856	0.999941	Eogt	6	97110024	97149182	protein_coding	EGF domain-specific O-linked N-acetylglucosamine (GlcNAc) transferase [Source:MGI Symbol;Acc:MGI:2141669]
ENSMUSG00000037750	605.246	608.68	597.37	527.308	508.398	531.602	507.976	498.368	428.734	513.976	563.101	487.263	0.208233	0.0619464	0.999941	Fam222b	11	78094660	78156700	protein_coding	family with sequence similarity 222, member B [Source:MGI Symbol;Acc:MGI:2384939]
ENSMUSG00000040258	165.427	146.822	186.678	184.264	188.724	146.24	158.274	214.535	239.701	222.045	169.692	208.639	-0.300533	0.06202	0.999941	Nxph4	10	127525473	127534559	protein_coding	neurexophilin 4 [Source:MGI Symbol;Acc:MGI:1336197]
ENSMUSG00000048782	85.1902	71.9526	64.1706	102.913	109.768	82.0129	78.0678	119.608	122.774	133.581	86.0012	113.508	-0.400666	0.0621658	0.999941	Insc	7	114743694	114850383	protein_coding	INSC spindle orientation adaptor protein [Source:MGI Symbol;Acc:MGI:1917942]
ENSMUSG00000028224	290.241	331.565	324.353	359.706	324.489	367.576	298.369	264.847	294.268	290.162	332.988	286.911	0.215466	0.0621951	0.999941	Nbn	4	15957925	15992589	protein_coding	nibrin [Source:MGI Symbol;Acc:MGI:1351625]
ENSMUSG00000048047	577.51	609.652	404.858	544.95	606.611	613.614	367.881	526.846	399.502	517.514	559.533	452.936	0.304756	0.0622491	0.999941	Zbtb33	X	38189793	38197046	protein_coding	zinc finger and BTB domain containing 33 [Source:MGI Symbol;Acc:MGI:1927290]
ENSMUSG00000026347	402.177	340.316	259.016	462.62	371.67	404.136	359.326	518.303	528.123	474.167	373.322	469.98	-0.33177	0.0623331	0.999941	Tmem163	1	127486546	127679548	protein_coding	transmembrane protein 163 [Source:MGI Symbol;Acc:MGI:1919410]
ENSMUSG00000024270	1071.81	1071.51	1194.74	924.259	845.404	918.939	940.022	830.613	805.826	839.523	1004.44	853.996	0.233873	0.0623341	0.999941	Slc39a6	18	24579881	24603817	protein_coding	solute carrier family 39 (metal ion transporter), member 6 [Source:MGI Symbol;Acc:MGI:2147279]
ENSMUSG00000016487	582.463	682.577	495.864	590.036	655.718	627.448	500.49	619.875	419.965	473.282	605.684	503.403	0.26743	0.0623698	0.999941	Ppfibp1	6	146888487	147032025	protein_coding	PTPRF interacting protein, binding protein 1 (liprin beta 1) [Source:MGI Symbol;Acc:MGI:1914783]
ENSMUSG00000041438	506.188	474.498	483.03	359.706	343.746	412.041	392.478	374.013	313.756	332.625	429.868	353.218	0.283306	0.0624241	0.999941	Utp4	8	106893636	106923088	protein_coding	UTP4 small subunit processome component [Source:MGI Symbol;Acc:MGI:1096573]
ENSMUSG00000086784	392.271	293.644	308.019	341.084	296.566	202.562	429.908	296.173	485.249	366.241	305.691	394.393	-0.367167	0.0626445	0.999941	Isoc2a	7	4877153	4896973	protein_coding	isochorismatase domain containing 2a [Source:MGI Symbol;Acc:MGI:3609243]
ENSMUSG00000049858	168.399	225.581	214.68	208.767	219.536	201.574	164.691	134.797	193.905	184.89	206.423	169.571	0.283115	0.0626636	0.999941	Suox	10	128669894	128674073	protein_coding	sulfite oxidase [Source:MGI Symbol;Acc:MGI:2446117]
ENSMUSG00000078817	3.96233	0	1.16674	2.94038	5.77725	0	0	0	0.974396	0	2.30778	0.243599	2.98156	0.0626641	0.999941	Nlrp12	7	3218784	3249740	protein_coding	NLR family, pyrin domain containing 12 [Source:MGI Symbol;Acc:MGI:2676630]
ENSMUSG00000046748	0.990583	3.88933	1.16674	2.94038	0	2.96432	1.06942	0	0	0	1.99189	0.267356	2.76838	0.0627719	0.999941	Tmem45a2	16	57036967	57071372	protein_coding	transmembrane protein 45A2 [Source:MGI Symbol;Acc:MGI:1916707]
ENSMUSG00000021215	515.103	406.435	451.528	358.726	380.336	327.063	417.075	302.818	289.396	299.008	406.532	327.074	0.314521	0.0627737	0.999941	Net1	13	3882018	3918220	protein_coding	neuroepithelial cell transforming gene 1 [Source:MGI Symbol;Acc:MGI:1927138]
ENSMUSG00000027714	387.318	393.794	542.534	490.063	449.663	397.219	378.575	337.941	428.734	322.009	443.432	366.815	0.273418	0.0628037	0.999941	Exosc9	3	36552606	36565727	protein_coding	exosome component 9 [Source:MGI Symbol;Acc:MGI:1355319]
ENSMUSG00000007039	197.126	163.352	191.345	155.84	139.617	126.478	237.412	116.76	324.474	215.852	162.293	223.625	-0.462734	0.0629808	0.999941	Ddah2	17	35059035	35062095	protein_coding	dimethylarginine dimethylaminohydrolase 2 [Source:MGI Symbol;Acc:MGI:1859016]
ENSMUSG00000028577	830.109	916.909	925.224	939.941	895.474	1033.56	804.206	823.968	732.746	878.448	923.536	809.842	0.189185	0.062996	0.999941	Plaa	4	94567514	94603244	protein_coding	phospholipase A2, activating protein [Source:MGI Symbol;Acc:MGI:104810]
ENSMUSG00000020486	3409.59	3373.99	3608.72	3985.19	3841.87	4168.82	3859.54	3872.08	5171.12	4578.01	3731.37	4370.19	-0.22803	0.0629973	0.999941	Septin4	11	87568903	87590539	protein_coding	septin 4 [Source:MGI Symbol;Acc:MGI:1270156]
ENSMUSG00000066896	0.990583	0	0	4.90063	4.81438	2.96432	0	0.949272	0	0	2.27832	0.237318	2.96769	0.063084	0.999941	Olfr18	9	20312152	20336094	protein_coding	olfactory receptor 18 [Source:MGI Symbol;Acc:MGI:109317]
ENSMUSG00000031849	5.9435	4.86166	7.00043	30.3839	16.3689	16.7978	12.8331	24.6811	40.9246	26.5392	13.5594	26.2445	-0.950076	0.0632375	0.999941	Comp	8	70373558	70382066	protein_coding	cartilage oligomeric matrix protein [Source:MGI Symbol;Acc:MGI:88469]
ENSMUSG00000068686	22.7834	17.502	11.6674	17.6423	17.3318	9.88107	31.0132	16.1376	32.1551	22.116	16.1346	25.3555	-0.642679	0.0633096	0.999941	Cd59b	2	104069849	104091187	protein_coding	CD59b antigen [Source:MGI Symbol;Acc:MGI:1888996]
ENSMUSG00000005107	24.7646	33.0593	25.6683	33.3243	38.515	26.6789	21.3884	23.7318	16.5647	23.0006	30.3351	21.1714	0.520455	0.0633489	0.999941	Slc2a9	5	38349273	38503143	protein_coding	solute carrier family 2 (facilitated glucose transporter), member 9 [Source:MGI Symbol;Acc:MGI:2152844]
ENSMUSG00000038676	14.8588	6.80632	14.0009	5.88076	0.962875	8.89296	4.27769	0.949272	5.84638	2.65392	8.56709	3.43181	1.32172	0.06342	0.999941	Ucn	5	31138063	31138829	protein_coding	urocortin [Source:MGI Symbol;Acc:MGI:1276123]
ENSMUSG00000048485	104.011	105.984	138.842	82.3306	102.065	95.8464	76.9984	107.268	68.2077	69.0019	104.847	80.369	0.380766	0.0635628	0.999941	Zbtb8b	4	129425765	129440853	protein_coding	zinc finger and BTB domain containing 8b [Source:MGI Symbol;Acc:MGI:2387181]
ENSMUSG00000030347	501.235	511.447	728.045	525.348	507.435	585.947	484.448	493.621	440.427	459.128	559.91	469.406	0.25334	0.0635921	0.999941	D6Wsu163e	6	126939962	126975967	protein_coding	DNA segment, Chr 6, Wayne State University 163, expressed [Source:MGI Symbol;Acc:MGI:107893]
ENSMUSG00000030897	11.887	21.3913	22.168	18.6224	23.109	7.90486	34.2215	25.6303	32.1551	18.5774	17.5138	27.6461	-0.656164	0.0636808	0.999941	Cnga4	7	105404568	105408742	protein_coding	cyclic nucleotide gated channel alpha 4 [Source:MGI Symbol;Acc:MGI:2664099]
ENSMUSG00000033579	817.231	667.992	810.884	652.764	828.073	862.617	751.804	966.359	935.42	1022.64	773.26	919.057	-0.249892	0.0637807	0.999941	Fa2h	8	111345135	111393824	protein_coding	fatty acid 2-hydroxylase [Source:MGI Symbol;Acc:MGI:2443327]
ENSMUSG00000024784	0	0	1.16674	1.96025	2.88863	0.988107	6.41653	6.6449	1.94879	1.76928	1.16729	4.19488	-1.83269	0.0639912	0.999941	Gpha2	19	6226380	6227768	protein_coding	glycoprotein hormone alpha 2 [Source:MGI Symbol;Acc:MGI:2156541]
ENSMUSG00000098022	7.92467	10.6957	11.6674	12.7416	9.62875	5.92864	5.34711	7.59418	2.92319	4.4232	9.76446	5.07192	0.943042	0.0643161	0.999941	Zfp82	7	30054489	30072900	protein_coding	zinc finger protein 82 [Source:MGI Symbol;Acc:MGI:1890753]
ENSMUSG00000038534	348.685	281.004	217.013	329.322	377.447	243.074	380.714	393.948	350.783	365.356	299.424	372.7	-0.31446	0.0644059	0.999941	Osbpl7	11	97050628	97068904	protein_coding	oxysterol binding protein-like 7 [Source:MGI Symbol;Acc:MGI:1918490]
ENSMUSG00000095742	13.8682	27.2253	17.5011	7.84101	13.4803	8.89296	37.4298	9.49272	22.4111	36.2702	14.8015	26.401	-0.835086	0.0644458	0.999941	CAAA01147332.1	JH584295.1	66	1479	protein_coding
ENSMUSG00000039270	2672.59	3190.22	2555.16	3161.89	3498.12	3721.21	2308.88	3119.31	2401.89	2583.15	3133.2	2603.31	0.267321	0.0646595	0.999941	Megf9	4	70427065	70534995	protein_coding	multiple EGF-like-domains 9 [Source:MGI Symbol;Acc:MGI:1918264]
ENSMUSG00000020671	2686.46	2732.25	2963.52	2587.53	2816.41	2922.82	2348.45	2591.51	2549.02	2553.96	2784.83	2510.74	0.149182	0.0647007	0.999941	Rab10	12	3247428	3309969	protein_coding	RAB10, member RAS oncogene family [Source:MGI Symbol;Acc:MGI:105066]
ENSMUSG00000015745	612.181	471.581	536.7	551.811	457.366	374.493	659.834	507.861	726.9	575.901	500.688	617.624	-0.302732	0.0649143	0.999941	Plekho1	3	95988429	95996001	protein_coding	pleckstrin homology domain containing, family O member 1 [Source:MGI Symbol;Acc:MGI:1914470]
ENSMUSG00000059816	8.91525	2.917	3.50022	1.96025	3.8515	2.96432	2.13884	0	0.974396	1.76928	4.01809	1.22063	1.73165	0.0649601	0.999941	Shisal2a	4	108367777	108383349	protein_coding	shisa like 2A [Source:MGI Symbol;Acc:MGI:3651644]
ENSMUSG00000032537	728.079	771.059	591.537	650.804	797.261	680.806	790.303	880.925	764.901	829.792	703.257	816.48	-0.214851	0.0649755	0.999941	Ephb1	9	101922128	102354693	protein_coding	Eph receptor B1 [Source:MGI Symbol;Acc:MGI:1096337]
ENSMUSG00000037640	675.578	717.581	744.379	804.684	727.934	839.891	589.252	711.954	671.359	647.557	751.674	655.03	0.198134	0.0650361	0.999941	Zfp60	7	27731389	27753702	protein_coding	zinc finger protein 60 [Source:MGI Symbol;Acc:MGI:99207]
ENSMUSG00000094678	0	0	4.66696	2.94038	0.962875	1.97621	0	0	0	0	1.75774	0	3.28936	0.0650388	0.999941	Olfr857	9	19709433	19714930	protein_coding	olfactory receptor 857 [Source:MGI Symbol;Acc:MGI:3030691]
ENSMUSG00000030681	174.343	153.628	187.845	297.958	215.684	162.05	291.952	210.738	314.73	225.583	198.585	260.751	-0.391874	0.065239	0.999941	Mvp	7	126986860	127014621	protein_coding	major vault protein [Source:MGI Symbol;Acc:MGI:1925638]
ENSMUSG00000007036	1213.46	1232.92	1233.24	1718.16	1282.55	1154.11	1498.26	1300.5	1903	1646.32	1305.74	1587.02	-0.281409	0.0652491	0.999941	Abhd16a	17	35089263	35102987	protein_coding	abhydrolase domain containing 16A [Source:MGI Symbol;Acc:MGI:99476]
ENSMUSG00000028004	323.921	317.953	309.186	172.502	221.461	277.658	196.774	224.977	228.983	195.505	270.447	211.56	0.35358	0.065316	0.999941	Npy2r	3	82538383	82548084	protein_coding	neuropeptide Y receptor Y2 [Source:MGI Symbol;Acc:MGI:108418]
ENSMUSG00000022389	7786.98	7231.23	6847.59	7137.28	6289.5	6624.27	6638.97	5933.9	6298.5	5998.74	6986.14	6217.53	0.168224	0.0654113	0.999941	Tef	15	81802421	81826863	protein_coding	thyrotroph embryonic factor [Source:MGI Symbol;Acc:MGI:98663]
ENSMUSG00000024491	808.316	722.443	724.545	830.167	772.226	915.975	572.141	798.338	658.692	677.634	795.612	676.701	0.233223	0.0655638	0.999941	Rbm27	18	42275353	42341542	protein_coding	RNA binding motif protein 27 [Source:MGI Symbol;Acc:MGI:2147194]
ENSMUSG00000039908	113.917	119.597	85.1719	122.516	117.471	98.8107	112.289	143.34	125.697	166.312	109.581	136.91	-0.321543	0.0656541	0.999941	Slc26a11	11	119355557	119381079	protein_coding	solute carrier family 26, member 11 [Source:MGI Symbol;Acc:MGI:2444589]
ENSMUSG00000028901	314.015	345.178	304.519	312.66	373.596	355.718	377.506	397.745	370.271	392.78	334.281	384.575	-0.201569	0.0656599	0.999941	Gmeb1	4	132221025	132261602	protein_coding	glucocorticoid modulatory element binding protein 1 [Source:MGI Symbol;Acc:MGI:2135604]
ENSMUSG00000036718	41.6045	35.9763	52.5032	59.7877	50.0695	49.4053	71.6513	53.1592	68.2077	60.1555	48.2244	63.2934	-0.391348	0.0657896	0.999941	Micall2	5	139706696	139736336	protein_coding	MICAL-like 2 [Source:MGI Symbol;Acc:MGI:2444818]
ENSMUSG00000044798	0	0	0	0	0.962875	0.988107	0	7.59418	1.94879	0.88464	0.325164	2.6069	-2.85721	0.0659168	0.999941	Olfr923	9	38826545	38830300	protein_coding	olfactory receptor 923 [Source:MGI Symbol;Acc:MGI:3030757]
ENSMUSG00000026385	1462.1	1368.07	1837.61	1601.53	1211.3	1223.28	2091.79	1149.57	2524.66	1791.4	1450.65	1889.35	-0.381274	0.0659229	0.999941	Dbi	1	120113280	120121078	protein_coding	diazepam binding inhibitor [Source:MGI Symbol;Acc:MGI:94865]
ENSMUSG00000027865	545.811	535.755	674.375	557.692	594.094	663.02	424.561	543.933	535.918	522.822	595.124	506.808	0.230399	0.0659575	0.999941	Gdap2	3	100162381	100206981	protein_coding	ganglioside-induced differentiation-associated-protein 2 [Source:MGI Symbol;Acc:MGI:1338001]
ENSMUSG00000045210	1470.03	1552.81	1486.43	1601.53	1758.21	1766.74	1086.53	1563.45	1383.64	1437.54	1605.96	1367.79	0.231311	0.0660772	0.999941	Vcpip1	1	9718622	9748382	protein_coding	valosin containing protein (p97)/p47 complex interacting protein 1 [Source:MGI Symbol;Acc:MGI:1917925]
ENSMUSG00000032034	53.4915	65.1462	36.1689	46.0659	34.6635	46.441	42.7769	29.4274	38.0015	23.8853	46.9962	33.5228	0.496689	0.0661573	0.999941	Kcnj5	9	32314707	32344350	protein_coding	potassium inwardly-rectifying channel, subfamily J, member 5 [Source:MGI Symbol;Acc:MGI:104755]
ENSMUSG00000094475	44.5763	38.8933	23.3348	20.5826	29.8491	34.5837	10.6942	8.54345	33.1295	24.7699	31.97	19.2843	0.726017	0.0661954	0.999941	Gm11007	2	175643978	175653860	protein_coding	predicted gene 11007 [Source:MGI Symbol;Acc:MGI:3779223]
ENSMUSG00000027104	1983.15	2277.2	2167.8	2280.75	2254.09	2672.83	1854.38	2142.51	1946.84	1994.86	2272.64	1984.65	0.195432	0.0662313	0.999941	Atf2	2	73816509	73892639	protein_coding	activating transcription factor 2 [Source:MGI Symbol;Acc:MGI:109349]
ENSMUSG00000030109	27.7363	35.9763	29.1685	69.589	45.2551	48.4172	60.9571	56.0071	64.3101	60.1555	42.6904	60.3574	-0.495615	0.066239	0.999941	Slc6a12	6	121343076	121365775	protein_coding	solute carrier family 6 (neurotransmitter transporter, betaine/GABA), member 12 [Source:MGI Symbol;Acc:MGI:95628]
ENSMUSG00000002105	397.224	387.96	344.188	492.023	424.628	440.696	424.561	469.89	572.945	509.553	414.453	494.237	-0.253682	0.0664161	0.999941	Slc39a13	2	91061791	91070417	protein_coding	solute carrier family 39 (metal ion transporter), member 13 [Source:MGI Symbol;Acc:MGI:1915677]
ENSMUSG00000027048	0	0	0	0	0	0	0	1.89854	5.84638	0.88464	0	2.15739	-3.54239	0.0667622	0.999941	Abcb11	2	69238282	69342616	protein_coding	ATP-binding cassette, sub-family B (MDR/TAP), member 11 [Source:MGI Symbol;Acc:MGI:1351619]
ENSMUSG00000039787	128.776	99.1779	114.34	190.144	149.246	164.026	160.413	182.26	201.7	177.813	140.952	180.547	-0.356353	0.0668245	0.999941	Cercam	2	29869164	29882840	protein_coding	cerebral endothelial cell adhesion molecule [Source:MGI Symbol;Acc:MGI:2139134]
ENSMUSG00000078862	203.07	245.028	236.848	204.846	268.642	299.396	193.565	214.535	195.854	200.813	242.972	201.192	0.272117	0.0668678	0.999941	Gm14326	2	177935993	177957297	protein_coding	predicted gene 14326 [Source:MGI Symbol;Acc:MGI:3709298]
ENSMUSG00000004894	581.472	470.609	436.36	724.313	538.247	585.947	577.488	677.78	705.463	762.56	556.158	680.823	-0.291694	0.0669343	0.999941	Hapln2	3	88021750	88027583	protein_coding	hyaluronan and proteoglycan link protein 2 [Source:MGI Symbol;Acc:MGI:2137300]
ENSMUSG00000027748	335.808	322.814	341.854	212.687	270.568	257.896	302.646	233.521	186.11	185.774	290.271	227.013	0.355684	0.0669636	0.999941	Trpc4	3	54156035	54318471	protein_coding	transient receptor potential cation channel, subfamily C, member 4 [Source:MGI Symbol;Acc:MGI:109525]
ENSMUSG00000050666	118.87	94.3162	87.5054	125.456	133.84	116.597	113.359	113.913	189.033	170.736	112.764	146.76	-0.379936	0.0669898	0.999941	Vstm4	14	32856756	32939491	protein_coding	V-set and transmembrane domain containing 4 [Source:MGI Symbol;Acc:MGI:2444633]
ENSMUSG00000004892	5559.15	5420.75	4468.61	4456.63	4425.37	3663.9	7061.4	4676.11	5467.34	5552.89	4665.74	5689.43	-0.286099	0.0670508	0.999941	Bcan	3	87987531	88000230	protein_coding	brevican [Source:MGI Symbol;Acc:MGI:1096385]
ENSMUSG00000080115	2.97175	0.972332	3.50022	3.9205	1.92575	0.988107	7.48596	11.3913	0	7.96176	2.37978	6.70975	-1.50691	0.0672145	0.999941	Eef1akmt3	10	127031004	127041513	protein_coding	EEF1A lysine methyltransferase 3 [Source:MGI Symbol;Acc:MGI:3645330]
ENSMUSG00000036459	135.71	96.2609	78.1715	93.112	63.5498	73.1199	197.843	78.7896	146.159	95.5411	89.9873	129.583	-0.523148	0.0672995	0.999941	Wtip	7	34109543	34133268	protein_coding	WT1-interacting protein [Source:MGI Symbol;Acc:MGI:2141920]
ENSMUSG00000027834	4245.64	5005.56	5397.33	5368.15	4708.46	5304.16	4201.76	4312.54	4723.87	4372.78	5004.88	4402.74	0.184854	0.0673847	0.999941	Serpini1	3	75557547	75643495	protein_coding	serine (or cysteine) peptidase inhibitor, clade I, member 1 [Source:MGI Symbol;Acc:MGI:1194506]
ENSMUSG00000015478	467.555	382.126	451.528	223.469	226.276	149.204	537.919	318.955	610.946	404.281	316.693	468.025	-0.563831	0.0679153	0.999941	Rnf5	17	34601091	34603690	protein_coding	ring finger protein 5 [Source:MGI Symbol;Acc:MGI:1860076]
ENSMUSG00000005470	20.8023	17.502	23.3348	19.6025	15.406	12.8454	13.9025	10.442	9.74396	12.385	18.2488	11.6184	0.648889	0.0681091	0.999941	Asf1b	8	83955507	83970197	protein_coding	anti-silencing function 1B histone chaperone [Source:MGI Symbol;Acc:MGI:1914179]
ENSMUSG00000022039	0	3.88933	0	1.96025	0	6.91675	0	0	0	0	2.12772	0	3.58536	0.0682184	0.999941	Adam2	14	66027329	66077733	protein_coding	a disintegrin and metallopeptidase domain 2 [Source:MGI Symbol;Acc:MGI:1340894]
ENSMUSG00000031079	60.4256	67.0909	54.8367	60.7678	80.8815	69.1675	37.4298	62.652	47.7454	52.1938	65.5283	50.0052	0.388078	0.0682543	0.999941	Zfp300	X	21079174	21089527	protein_coding	zinc finger protein 300 [Source:MGI Symbol;Acc:MGI:3045326]
ENSMUSG00000024792	276.373	314.063	287.018	325.402	249.385	229.241	382.853	292.376	366.373	309.624	280.247	337.806	-0.268613	0.0683057	0.999941	Zfpl1	19	6080762	6084944	protein_coding	zinc finger like protein 1 [Source:MGI Symbol;Acc:MGI:1891017]
ENSMUSG00000094595	13.8682	12.6403	22.168	22.5429	19.2575	15.8097	24.5967	27.5289	26.3087	24.7699	17.7144	25.8011	-0.547731	0.0684969	0.999941	Fsbp	4	11579665	11587591	protein_coding	fibrinogen silencer binding protein [Source:MGI Symbol;Acc:MGI:5301008]
ENSMUSG00000024991	3270.91	3335.1	3061.52	3041.33	3531.83	3474.18	2653.24	3092.73	2944.63	3030.78	3285.81	2930.34	0.165112	0.0686061	0.999941	Eif3a	19	60761116	60790693	protein_coding	eukaryotic translation initiation factor 3, subunit A [Source:MGI Symbol;Acc:MGI:95301]
ENSMUSG00000027823	1575.03	1596.57	1730.27	1653.47	1770.73	1895.19	1338.92	1614.71	1558.06	1499.46	1703.54	1502.79	0.180609	0.0688308	0.999941	Gmps	3	63976106	64022579	protein_coding	guanine monophosphate synthetase [Source:MGI Symbol;Acc:MGI:2448526]
ENSMUSG00000045822	171.371	180.854	178.511	112.715	118.434	157.109	110.15	112.014	122.774	138.004	153.165	120.736	0.340467	0.0688877	0.999941	Zswim3	2	164805098	164822130	protein_coding	zinc finger SWIM-type containing 3 [Source:MGI Symbol;Acc:MGI:1914788]
ENSMUSG00000060044	11.887	18.4743	8.16717	16.6621	8.66588	13.8335	6.41653	6.6449	8.76957	7.96176	12.9483	7.44819	0.800695	0.0690628	0.999941	Tmem26	10	68723646	68782650	protein_coding	transmembrane protein 26 [Source:MGI Symbol;Acc:MGI:2143537]
ENSMUSG00000052759	8.91525	11.668	9.33391	8.82114	3.8515	2.96432	13.9025	9.49272	10.7184	21.2314	7.59235	13.8362	-0.874578	0.069163	0.999941	Gpr25	1	136259797	136260873	protein_coding	G protein-coupled receptor 25 [Source:MGI Symbol;Acc:MGI:2686146]
ENSMUSG00000060586	52.5009	25.2806	30.3352	23.523	42.3665	20.7502	31.0132	37.9709	86.7213	47.7706	32.4594	50.869	-0.648806	0.0692001	0.999941	H2-Eb1	17	34305877	34316199	protein_coding	histocompatibility 2, class II antigen E beta [Source:MGI Symbol;Acc:MGI:95901]
ENSMUSG00000027411	751.853	804.119	871.554	890.935	772.226	713.413	944.3	821.12	949.062	947.45	800.683	915.483	-0.193579	0.0693671	0.999941	Vps16	2	130424339	130444269	protein_coding	VSP16 CORVET/HOPS core subunit [Source:MGI Symbol;Acc:MGI:2136772]
ENSMUSG00000004415	134.719	102.095	79.3382	102.913	104.953	103.751	115.498	114.862	143.236	151.273	104.628	131.217	-0.325927	0.0694872	0.999941	Col26a1	5	136741759	136883209	protein_coding	collagen, type XXVI, alpha 1 [Source:MGI Symbol;Acc:MGI:2155345]
ENSMUSG00000054931	52.5009	61.2569	40.8359	55.8672	39.4779	40.5124	85.5538	45.5651	79.9005	54.8477	48.4085	66.4668	-0.451561	0.069568	0.999941	Zkscan4	13	21478907	21485507	protein_coding	zinc finger with KRAB and SCAN domains 4 [Source:MGI Symbol;Acc:MGI:3649412]
ENSMUSG00000040616	91.1337	85.5652	81.6717	94.0921	81.8444	68.1794	118.706	75.9418	125.697	105.272	83.7477	106.404	-0.343515	0.0696303	0.999941	Tmem51	4	142030992	142084304	protein_coding	transmembrane protein 51 [Source:MGI Symbol;Acc:MGI:2384874]
ENSMUSG00000004562	525.009	500.751	446.861	519.467	555.579	516.78	560.377	599.94	548.585	612.171	510.741	580.268	-0.183675	0.0698567	0.999941	Arhgef40	14	51984719	52006251	protein_coding	Rho guanine nucleotide exchange factor (GEF) 40 [Source:MGI Symbol;Acc:MGI:2685515]
ENSMUSG00000090122	95.096	89.4545	100.34	99.9729	90.5103	59.2864	101.595	104.42	150.057	102.618	89.1099	114.673	-0.364924	0.0698758	0.999941	Kcne1l	X	142304752	142306294	protein_coding	potassium voltage-gated channel, Isk-related family, member 1-like, pseudogene [Source:MGI Symbol;Acc:MGI:1913490]
ENSMUSG00000045509	82.2184	82.6482	51.3365	39.205	42.3665	46.441	115.498	55.0578	90.6188	70.7712	57.3693	82.9864	-0.529319	0.0699717	0.999941	Gpr150	13	76054851	76056996	protein_coding	G protein-coupled receptor 150 [Source:MGI Symbol;Acc:MGI:2441872]
ENSMUSG00000036885	554.727	537.7	584.536	618.46	615.277	775.664	506.906	569.563	517.404	493.629	614.394	521.876	0.235594	0.0700368	0.999941	Arhgef26	3	62338344	62462221	protein_coding	Rho guanine nucleotide exchange factor (GEF) 26 [Source:MGI Symbol;Acc:MGI:1918053]
ENSMUSG00000042901	872.704	940.245	1206.41	1042.85	966.727	1119.53	851.26	829.664	956.857	886.409	1024.74	881.048	0.217438	0.070037	0.999941	Aida	1	183296590	183325476	protein_coding	axin interactor, dorsalization associated [Source:MGI Symbol;Acc:MGI:1919737]
ENSMUSG00000008429	1016.34	1058.87	1040.73	886.034	1019.68	1031.58	883.343	914.149	868.187	937.718	1008.87	900.849	0.162994	0.0700608	0.999941	Herpud2	9	25108132	25151820	protein_coding	HERPUD family member 2 [Source:MGI Symbol;Acc:MGI:1915393]
ENSMUSG00000033634	0.990583	3.88933	3.50022	5.88076	3.8515	8.89296	10.6942	9.49272	17.5391	2.65392	4.50089	10.095	-1.15544	0.0701039	0.999941	Nat8f2	6	85865422	85869158	protein_coding	N-acetyltransferase 8 (GCN5-related) family member 2 [Source:MGI Symbol;Acc:MGI:2136446]
ENSMUSG00000095789	12.8776	8.75099	11.6674	25.4833	12.5174	9.88107	22.4579	9.49272	32.1551	28.3085	13.5296	23.1035	-0.770853	0.0701598	0.999941	Nupr1l	5	129908540	129913789	protein_coding	nuclear protein transcriptional regulator 1 like [Source:MGI Symbol;Acc:MGI:1923099]
ENSMUSG00000024479	3184.73	2824.62	3339.21	2546.37	2549.69	2686.66	2717.4	2150.1	2551.94	2370.84	2855.21	2447.57	0.22222	0.070297	0.999941	Mal2	15	54571192	54602847	protein_coding	mal, T cell differentiation protein 2 [Source:MGI Symbol;Acc:MGI:2146021]
ENSMUSG00000029998	2076.26	2410.41	2110.63	2048.46	1953.67	2155.06	2013.72	1947.91	1804.58	1798.47	2125.75	1891.17	0.168891	0.07031	0.999941	Pcyox1	6	86386006	86397154	protein_coding	prenylcysteine oxidase 1 [Source:MGI Symbol;Acc:MGI:1914131]
ENSMUSG00000017390	15775	14366.2	16167.5	17361	13688.2	13202.1	18721.3	14882.7	19147.9	17449.5	15093.3	17550.3	-0.217588	0.0705884	0.999941	Aldoc	11	78322968	78327781	protein_coding	aldolase C, fructose-bisphosphate [Source:MGI Symbol;Acc:MGI:101863]
ENSMUSG00000021265	266.467	175.992	213.513	231.31	201.241	182.8	263.078	225.927	285.498	253.007	211.887	256.877	-0.277649	0.0706732	0.999941	Slc25a29	12	108825873	108835883	protein_coding	solute carrier family 25 (mitochondrial carrier, palmitoylcarnitine transporter), member 29 [Source:MGI Symbol;Acc:MGI:2444911]
ENSMUSG00000023927	1674.09	1873.68	1656.77	1305.53	1595.48	1604.69	1431.96	1379.29	1408	1407.46	1618.37	1406.68	0.202251	0.0707526	0.999941	Satb1	17	51736187	51833290	protein_coding	special AT-rich sequence binding protein 1 [Source:MGI Symbol;Acc:MGI:105084]
ENSMUSG00000034485	202.079	145.85	142.342	172.502	184.872	207.502	141.164	150.934	144.211	142.427	175.858	144.684	0.282876	0.0708088	0.999941	Uaca	9	60794542	60880370	protein_coding	uveal autoantigen with coiled-coil domains and ankyrin repeats [Source:MGI Symbol;Acc:MGI:1919815]
ENSMUSG00000022500	352.648	370.458	372.19	492.023	439.071	508.875	445.949	519.252	535.918	526.361	422.544	506.87	-0.262464	0.0708743	0.999941	Litaf	16	10959275	11066157	protein_coding	LPS-induced TN factor [Source:MGI Symbol;Acc:MGI:1929512]
ENSMUSG00000038205	841.996	795.368	863.387	746.856	988.873	869.534	610.64	858.142	675.257	745.752	851.002	722.448	0.235701	0.0710292	0.999941	Prkab2	3	97658193	97673812	protein_coding	protein kinase, AMP-activated, beta 2 non-catalytic subunit [Source:MGI Symbol;Acc:MGI:1336185]
ENSMUSG00000028967	622.086	576.593	585.703	526.328	563.282	585.947	512.253	528.745	483.301	525.476	576.657	512.444	0.16993	0.0714054	0.999941	Errfi1	4	150853919	150868892	protein_coding	ERBB receptor feedback inhibitor 1 [Source:MGI Symbol;Acc:MGI:1921405]
ENSMUSG00000000159	3.96233	2.917	1.16674	1.96025	2.88863	7.90486	1.06942	0.949272	0	1.76928	3.46663	0.946994	1.86347	0.071574	0.999941	Igsf5	16	96361668	96422121	protein_coding	immunoglobulin superfamily, member 5 [Source:MGI Symbol;Acc:MGI:1919308]
ENSMUSG00000020325	11.887	6.80632	4.66696	7.84101	8.66588	13.8335	22.4579	12.3405	16.5647	10.6157	8.95011	15.4947	-0.774536	0.0716412	0.999941	Fstl3	10	79777272	79782630	protein_coding	follistatin-like 3 [Source:MGI Symbol;Acc:MGI:1890391]
ENSMUSG00000046805	672.606	722.443	809.717	482.222	525.73	542.471	534.711	519.252	496.942	490.091	625.865	510.249	0.294124	0.0716734	0.999941	Mpeg1	19	12460779	12465284	protein_coding	macrophage expressed gene 1 [Source:MGI Symbol;Acc:MGI:1333743]
ENSMUSG00000074364	179.296	135.154	164.51	118.595	154.06	169.954	128.331	113.913	114.004	142.427	153.595	124.669	0.299477	0.0716765	0.999941	Ehd2	7	15946958	15967567	protein_coding	EH-domain containing 2 [Source:MGI Symbol;Acc:MGI:2154274]
ENSMUSG00000075045	0	0	0	0	0	0	1.06942	0	1.94879	5.30784	0	2.08151	-3.49647	0.071696	0.999941	Gm4981	10	58234848	58236701	protein_coding	predicted gene 4981 [Source:MGI Symbol;Acc:MGI:3645498]
ENSMUSG00000020902	288.26	284.893	204.179	407.732	429.442	360.659	337.937	448.056	490.121	433.474	329.194	427.397	-0.375935	0.0718721	0.999941	Ntn1	11	68209364	68400823	protein_coding	netrin 1 [Source:MGI Symbol;Acc:MGI:105088]
ENSMUSG00000024976	997.517	1144.43	1131.74	1093.82	1148.71	1247.98	871.579	1104.95	912.035	1037.68	1127.37	981.562	0.199317	0.0719852	0.999941	Shoc2	19	53944306	54033268	protein_coding	Shoc2, leucine rich repeat scaffold protein [Source:MGI Symbol;Acc:MGI:1927197]
ENSMUSG00000063415	122.832	140.988	117.841	191.125	182.946	202.562	119.775	260.101	241.65	244.161	159.716	216.422	-0.438697	0.0719887	0.999941	Cyp26b1	6	84571414	84593908	protein_coding	cytochrome P450, family 26, subfamily b, polypeptide 1 [Source:MGI Symbol;Acc:MGI:2176159]
ENSMUSG00000007655	227.834	278.087	283.518	245.032	242.645	298.408	206.398	228.775	212.418	243.276	262.587	222.717	0.23559	0.0721999	0.999941	Cav1	6	17306335	17341452	protein_coding	caveolin 1, caveolae protein [Source:MGI Symbol;Acc:MGI:102709]
ENSMUSG00000029670	309.062	322.814	413.026	398.911	300.417	380.421	288.744	297.122	263.087	334.394	354.109	295.837	0.257705	0.072241	0.999941	Ing3	6	21949571	21976038	protein_coding	inhibitor of growth family, member 3 [Source:MGI Symbol;Acc:MGI:1919027]
ENSMUSG00000091680	17.8305	17.502	18.6678	19.6025	34.6635	20.7502	20.319	40.8187	29.2319	37.1549	21.5028	31.8811	-0.570801	0.0723846	0.999941	Klhdc7b	15	89384917	89388867	protein_coding	kelch domain containing 7B [Source:MGI Symbol;Acc:MGI:3648212]
ENSMUSG00000020305	278.354	266.419	330.187	288.157	319.675	331.016	211.746	299.97	252.369	253.007	302.301	254.273	0.247734	0.0724566	0.999941	Asb3	11	30885416	31102704	protein_coding	ankyrin repeat and SOCS box-containing 3 [Source:MGI Symbol;Acc:MGI:1929749]
ENSMUSG00000047415	259.533	262.53	282.351	215.628	215.684	215.407	183.941	225.927	195.854	205.237	241.855	202.739	0.252136	0.0726447	0.999941	Gpr68	12	100876682	100908198	protein_coding	G protein-coupled receptor 68 [Source:MGI Symbol;Acc:MGI:2441763]
ENSMUSG00000048120	272.41	198.356	232.181	190.144	243.607	257.896	194.635	203.144	174.417	201.698	232.432	193.473	0.264219	0.0726532	0.999941	Entpd1	19	40612366	40741602	protein_coding	ectonucleoside triphosphate diphosphohydrolase 1 [Source:MGI Symbol;Acc:MGI:102805]
ENSMUSG00000021553	5.9435	1.94466	5.83369	2.94038	4.81438	1.97621	7.48596	10.442	5.84638	7.96176	3.9088	7.93402	-1.03483	0.0726698	0.999941	Slc28a3	13	58545399	58610877	protein_coding	solute carrier family 28 (sodium-coupled nucleoside transporter), member 3 [Source:MGI Symbol;Acc:MGI:2137361]
ENSMUSG00000033770	0.990583	0	1.16674	1.96025	0	0.988107	8.55538	1.89854	0	4.4232	0.850947	3.71928	-2.13112	0.0727484	0.999941	Clcnka	4	141384610	141398724	protein_coding	chloride channel, voltage-sensitive Ka [Source:MGI Symbol;Acc:MGI:1329026]
ENSMUSG00000014353	814.26	841.067	841.219	1028.15	994.65	1074.07	695.124	887.569	830.186	761.675	932.237	793.639	0.232204	0.0728277	0.999941	Tmem87b	2	128818118	128854261	protein_coding	transmembrane protein 87B [Source:MGI Symbol;Acc:MGI:1919727]
ENSMUSG00000022220	57.4538	35.004	38.5024	30.3839	73.1785	74.108	38.4992	36.0723	38.0015	28.3085	51.4384	35.2204	0.550878	0.0728857	0.999941	Adcy4	14	55769057	55784095	protein_coding	adenylate cyclase 4 [Source:MGI Symbol;Acc:MGI:99674]
ENSMUSG00000043999	210.004	220.719	196.012	203.866	223.387	248.015	158.274	196.499	188.058	193.736	217.001	184.142	0.235979	0.0729643	0.999941	Gpr75	11	30885358	30893729	protein_coding	G protein-coupled receptor 75 [Source:MGI Symbol;Acc:MGI:2441843]
ENSMUSG00000095440	46.5574	32.087	32.6687	52.9268	71.2528	34.5837	44.9157	56.0071	73.0797	83.1562	45.0127	64.2897	-0.514215	0.0730594	0.999941	Fignl2	15	101050194	101078567	protein_coding	fidgetin-like 2 [Source:MGI Symbol;Acc:MGI:3646919]
ENSMUSG00000029658	8.91525	22.3636	17.5011	14.7019	15.406	5.92864	23.5273	19.9347	18.5135	28.3085	14.1361	22.571	-0.679347	0.0731944	0.999941	Wdr95	5	149528679	149611894	protein_coding	WD40 repeat domain 95 [Source:MGI Symbol;Acc:MGI:1923042]
ENSMUSG00000035916	9.90583	10.6957	2.33348	6.86088	6.74013	0.988107	2.13884	1.89854	0.974396	4.4232	6.25401	2.35875	1.39903	0.0736414	0.999941	Ptprq	10	107517049	107720051	protein_coding	protein tyrosine phosphatase, receptor type, Q [Source:MGI Symbol;Acc:MGI:1096349]
ENSMUSG00000026730	1368.99	1577.12	2895.85	1126.16	1068.79	1232.17	1352.82	973.004	1177.07	955.411	1544.85	1114.58	0.470792	0.0736636	0.999941	Pter	2	12924041	13003455	protein_coding	phosphotriesterase related [Source:MGI Symbol;Acc:MGI:107372]
ENSMUSG00000062545	8.91525	14.585	7.00043	7.84101	8.66588	10.8692	23.5273	10.442	18.5135	12.385	9.64612	16.2169	-0.734692	0.0736737	0.999941	Tlr12	4	128615443	128618619	protein_coding	toll-like receptor 12 [Source:MGI Symbol;Acc:MGI:3045221]
ENSMUSG00000052821	21.7928	11.668	30.3352	28.4237	14.4431	25.6908	7.48596	17.0869	14.6159	15.0389	22.0589	13.5569	0.688439	0.0737812	0.999941	Cysltr1	X	106574346	106603679	protein_coding	cysteinyl leukotriene receptor 1 [Source:MGI Symbol;Acc:MGI:1926218]
ENSMUSG00000048787	379.393	327.676	369.856	325.402	293.677	315.206	296.23	299.97	273.805	286.623	335.202	289.157	0.212351	0.0739321	0.999941	Dcun1d3	7	119852796	119896298	protein_coding	DCN1, defective in cullin neddylation 1, domain containing 3 (S. cerevisiae) [Source:MGI Symbol;Acc:MGI:2679003]
ENSMUSG00000029290	564.633	520.198	529.699	628.261	645.126	706.496	417.075	566.715	514.481	522.822	599.069	505.273	0.245306	0.0740246	0.999941	Zfp326	5	105876565	105915818	protein_coding	zinc finger protein 326 [Source:MGI Symbol;Acc:MGI:1927246]
ENSMUSG00000067597	10.8964	13.6126	25.6683	8.82114	6.74013	16.7978	7.48596	10.442	4.87198	7.07712	13.7561	7.46926	0.868056	0.0740401	0.999941	Dgat2l6	X	100524838	100546144	protein_coding	diacylglycerol O-acyltransferase 2-like 6 [Source:MGI Symbol;Acc:MGI:3045268]
ENSMUSG00000040918	355.619	347.123	386.191	383.229	414.036	414.017	296.23	331.296	345.911	357.395	383.369	332.708	0.203241	0.074112	0.999941	Slc19a2	1	164249046	164265385	protein_coding	solute carrier family 19 (thiamine transporter), member 2 [Source:MGI Symbol;Acc:MGI:1928761]
ENSMUSG00000048387	37.6422	23.336	22.168	15.682	9.62875	27.667	32.0827	25.6303	47.7454	35.3856	22.6873	35.211	-0.635264	0.0743946	0.999941	Osr1	12	9570116	9581500	protein_coding	odd-skipped related transcription factor 1 [Source:MGI Symbol;Acc:MGI:1344424]
ENSMUSG00000111375	1539.37	1736.58	1642.77	1242.8	1532.9	1691.64	1468.32	1396.38	1252.1	1279.19	1564.34	1349	0.21378	0.0745156	0.999941	Btbd8	5	107437997	107511207	protein_coding	BTB (POZ) domain containing 8 [Source:MGI Symbol;Acc:MGI:3646208]
ENSMUSG00000049124	30.7081	24.3083	56.0035	24.5032	42.3665	15.8097	114.428	33.2245	40.9246	30.9624	32.2832	54.8849	-0.765087	0.0747845	0.999941	Gm8186	17	26098872	26099257	protein_coding	predicted gene 8186 [Source:MGI Symbol;Acc:MGI:3643110]
ENSMUSG00000032985	39.6233	55.4229	47.8363	41.1653	49.1066	62.2507	87.6926	71.1954	67.2333	41.5781	49.2342	66.9249	-0.437495	0.074788	0.999941	5730522E02Rik	11	25602763	26210763	protein_coding	RIKEN cDNA 5730522E02 gene [Source:MGI Symbol;Acc:MGI:1917876]
ENSMUSG00000019761	142.644	105.012	142.342	141.138	103.991	125.49	197.843	106.318	187.084	159.235	126.769	162.62	-0.358924	0.0750292	0.999941	Krt10	11	99385254	99389364	protein_coding	keratin 10 [Source:MGI Symbol;Acc:MGI:96685]
ENSMUSG00000026155	548.783	568.814	505.198	495.944	530.544	540.494	464.129	556.273	359.552	421.089	531.63	450.261	0.239968	0.0750374	0.999941	Smap1	1	23844846	23922317	protein_coding	small ArfGAP 1 [Source:MGI Symbol;Acc:MGI:2138261]
ENSMUSG00000024736	2410.09	2102.18	2171.3	2060.23	2315.71	1638.28	2255.41	2456.72	2460.35	2713.19	2116.3	2471.42	-0.223949	0.0751485	0.999941	Tmem132a	19	10857822	10869940	protein_coding	transmembrane protein 132A [Source:MGI Symbol;Acc:MGI:2147810]
ENSMUSG00000027782	1650.31	1776.45	1888.95	1881.84	1988.34	2253.87	1250.15	1833.04	1630.16	1721.51	1906.63	1608.72	0.244805	0.0752874	0.999941	Kpna4	3	69067149	69127113	protein_coding	karyopherin (importin) alpha 4 [Source:MGI Symbol;Acc:MGI:1100848]
ENSMUSG00000074345	231.797	282.949	324.353	194.065	226.276	188.728	198.913	199.347	193.905	184.005	241.361	194.042	0.313432	0.0753228	0.999941	Tnfaip8l3	9	54023405	54068388	protein_coding	tumor necrosis factor, alpha-induced protein 8-like 3 [Source:MGI Symbol;Acc:MGI:2685363]
ENSMUSG00000058743	58.4444	35.9763	50.1698	43.1256	45.2551	35.5718	58.8182	42.7172	80.8749	59.2709	44.7572	60.4203	-0.434139	0.0753743	0.999941	Kcnj14	7	45816460	45824782	protein_coding	potassium inwardly-rectifying channel, subfamily J, member 14 [Source:MGI Symbol;Acc:MGI:2384820]
ENSMUSG00000029784	4.95292	4.86166	3.50022	3.9205	2.88863	1.97621	0	1.89854	0.974396	1.76928	3.68336	1.16056	1.62812	0.0753875	0.999941	Ssmem1	6	30509849	30520254	protein_coding	serine-rich single-pass membrane protein 1 [Source:MGI Symbol;Acc:MGI:1922897]
ENSMUSG00000028382	466.565	478.387	469.029	550.831	616.24	701.556	373.228	547.73	403.4	454.705	547.101	444.766	0.298557	0.075389	0.999941	Ptbp3	4	59471868	59549364	protein_coding	polypyrimidine tract binding protein 3 [Source:MGI Symbol;Acc:MGI:1923334]
ENSMUSG00000024600	1.98117	0.972332	1.16674	0.980126	1.92575	2.96432	6.41653	2.84782	1.94879	7.07712	1.66507	4.57257	-1.45182	0.0754675	0.999941	Slc27a6	18	58556257	58612773	protein_coding	solute carrier family 27 (fatty acid transporter), member 6 [Source:MGI Symbol;Acc:MGI:3036230]
ENSMUSG00000022973	5855.34	7198.17	6261.89	5845.47	6429.12	6923.67	5112.91	6637.31	4926.55	5480.35	6418.94	5539.28	0.212606	0.0754882	0.999941	Synj1	16	90936092	91011308	protein_coding	synaptojanin 1 [Source:MGI Symbol;Acc:MGI:1354961]
ENSMUSG00000032640	262.505	294.617	247.349	231.31	268.642	223.312	243.828	210.738	195.854	214.968	254.622	216.347	0.236445	0.0755377	0.999941	Chsy1	7	66109515	66173798	protein_coding	chondroitin sulfate synthase 1 [Source:MGI Symbol;Acc:MGI:2681120]
ENSMUSG00000096210	1497.76	1407.94	1592.6	1718.16	1203.59	1237.11	1736.74	1326.13	2295.68	1740.09	1442.86	1774.66	-0.298683	0.0755683	0.999941	H1f0	15	79028450	79030504	protein_coding	H1 histone family, member 0 [Source:MGI Symbol;Acc:MGI:95893]
ENSMUSG00000028998	517.085	257.668	301.019	253.853	162.726	148.216	567.863	178.463	563.201	390.126	273.428	424.913	-0.635889	0.0758431	0.999941	Tomm7	5	23838944	23844161	protein_coding	translocase of outer mitochondrial membrane 7 [Source:MGI Symbol;Acc:MGI:1913419]
ENSMUSG00000016382	2841.98	3194.11	4001.91	3238.34	3229.48	3415.89	2744.14	2928.5	2986.52	2937.89	3320.29	2899.26	0.195367	0.0758466	0.999941	Pls3	X	75785654	75875182	protein_coding	plastin 3 (T-isoform) [Source:MGI Symbol;Acc:MGI:104807]
ENSMUSG00000029054	1269.93	1149.3	1096.73	1646.61	1398.09	1278.61	1420.19	1488.46	1689.6	1564.93	1306.55	1540.8	-0.237738	0.0759519	0.999941	Gabrd	4	155384980	155398112	protein_coding	gamma-aminobutyric acid (GABA) A receptor, subunit delta [Source:MGI Symbol;Acc:MGI:95622]
ENSMUSG00000058388	925.205	766.198	982.394	787.041	1015.83	972.297	579.627	893.265	790.235	761.675	908.161	756.201	0.263512	0.0759748	0.999941	Phtf1	3	103968110	104024598	protein_coding	putative homeodomain transcription factor 1 [Source:MGI Symbol;Acc:MGI:1332671]
ENSMUSG00000023025	964.828	1109.43	850.553	1064.42	1177.6	1207.47	746.457	1040.4	840.904	942.142	1062.38	892.476	0.251371	0.0761491	0.999941	Larp4	15	99970065	100016358	protein_coding	La ribonucleoprotein domain family, member 4 [Source:MGI Symbol;Acc:MGI:2443114]
ENSMUSG00000025176	12.8776	20.419	21.0013	14.7019	11.5545	18.774	14.9719	10.442	6.82077	8.8464	16.5547	10.2703	0.694125	0.0762293	0.999941	Hoga1	19	42045610	42070953	protein_coding	4-hydroxy-2-oxoglutarate aldolase 1 [Source:MGI Symbol;Acc:MGI:1914682]
ENSMUSG00000037922	34.6704	29.17	37.3356	14.7019	27.9234	29.6432	17.1108	15.1884	21.4367	23.8853	28.9074	19.4053	0.566778	0.0762674	0.999941	Bank1	3	136053363	136326066	protein_coding	B cell scaffold protein with ankyrin repeats 1 [Source:MGI Symbol;Acc:MGI:2442120]
ENSMUSG00000057715	1209.5	1535.31	1250.74	1121.26	1141.01	1128.42	1204.17	1067.93	932.497	993.451	1231.04	1049.51	0.230467	0.0764153	0.999941	A830018L16Rik	1	11414105	11975901	protein_coding	RIKEN cDNA A830018L16 gene [Source:MGI Symbol;Acc:MGI:2444149]
ENSMUSG00000078491	0	0	0	0	0	2.96432	1.06942	3.79709	2.92319	3.53856	0.494053	2.83206	-2.49508	0.0764493	0.999941	Gm13090	4	151089570	151091449	protein_coding	predicted gene 13090 [Source:MGI Symbol;Acc:MGI:3650445]
ENSMUSG00000018862	4.95292	11.668	8.16717	1.96025	0.962875	2.96432	0	1.89854	1.94879	2.65392	5.11259	1.62531	1.61673	0.0764615	0.999941	Otop3	11	115334731	115346927	protein_coding	otopetrin 3 [Source:MGI Symbol;Acc:MGI:1916852]
ENSMUSG00000025375	6664.64	6081.94	4362.44	5490.67	5645.34	4430.67	6979.05	6211.09	6346.24	6359.68	5445.95	6474.01	-0.24938	0.0764839	0.999941	Aatk	11	120007313	120047167	protein_coding	apoptosis-associated tyrosine kinase [Source:MGI Symbol;Acc:MGI:1197518]
ENSMUSG00000073234	3.96233	4.86166	8.16717	3.9205	2.88863	7.90486	11.7636	5.69563	13.6415	8.8464	5.28419	9.98681	-0.926489	0.0765639	0.999941	Gm8773	5	5573799	5576203	protein_coding	predicted gene 8773 [Source:MGI Symbol;Acc:MGI:3646213]
ENSMUSG00000062257	3178.78	3439.14	3107.03	2754.15	2991.65	2807.21	2868.19	2818.39	2539.28	2567.23	3046.33	2698.27	0.175125	0.0765967	0.999941	Opcml	9	27790775	28925410	protein_coding	opioid binding protein/cell adhesion molecule-like [Source:MGI Symbol;Acc:MGI:97397]
ENSMUSG00000025104	2118.86	2248.03	2131.63	2299.38	2147.21	2318.1	1988.06	2071.31	2055	1967.44	2210.53	2020.45	0.129834	0.0766587	0.999941	Hdgfl3	7	81881251	81934473	protein_coding	HDGF like 3 [Source:MGI Symbol;Acc:MGI:1352760]
ENSMUSG00000048922	6.93408	5.83399	4.66696	3.9205	0.962875	4.94053	0	0.949272	0	4.4232	4.54316	1.34312	1.69652	0.076953	0.999941	Cdca2	14	67676331	67715841	protein_coding	cell division cycle associated 2 [Source:MGI Symbol;Acc:MGI:1919787]
ENSMUSG00000035614	1005.44	1092.9	1034.9	945.822	1162.19	1221.3	774.262	1085.02	820.442	980.181	1077.09	914.976	0.234934	0.0769779	0.999941	Togaram1	12	64965804	65022573	protein_coding	TOG array regulator of axonemal microtubules 1 [Source:MGI Symbol;Acc:MGI:2684313]
ENSMUSG00000022555	407.13	385.043	427.026	435.176	450.626	452.553	501.559	417.68	512.532	524.592	426.259	489.091	-0.198403	0.0771098	0.999941	Dgat1	15	76502015	76511953	protein_coding	diacylglycerol O-acyltransferase 1 [Source:MGI Symbol;Acc:MGI:1333825]
ENSMUSG00000029265	804.354	865.375	948.559	887.014	883.919	977.238	705.819	785.048	847.725	818.292	894.41	789.221	0.179749	0.0771572	0.999941	Dr1	5	108268897	108280526	protein_coding	down-regulator of transcription 1 [Source:MGI Symbol;Acc:MGI:1100515]
ENSMUSG00000021066	2415.04	2332.62	2778.01	2221.95	2287.79	2401.1	2210.5	2086.5	2061.82	2224.87	2406.08	2145.92	0.164796	0.0771971	0.999941	Atl1	12	69892614	69966417	protein_coding	atlastin GTPase 1 [Source:MGI Symbol;Acc:MGI:1921241]
ENSMUSG00000041236	3053.97	3060.9	3523.55	3075.64	3099.49	3444.54	2858.57	2928.5	2924.16	2889.23	3209.68	2900.12	0.146117	0.0772172	0.999941	Vps41	13	18717286	18866811	protein_coding	VPS41 HOPS complex subunit [Source:MGI Symbol;Acc:MGI:1929215]
ENSMUSG00000029299	11.887	1.94466	3.50022	6.86088	11.5545	5.92864	2.13884	5.69563	0.974396	2.65392	6.94598	2.8657	1.27604	0.0773398	0.999941	Abcg3	5	104935057	104982718	protein_coding	ATP binding cassette subfamily G member 3 [Source:MGI Symbol;Acc:MGI:1351624]
ENSMUSG00000018599	321.94	254.751	252.016	233.27	183.909	183.788	349.701	210.738	346.885	316.701	238.279	306.006	-0.360792	0.077377	0.999941	Mief2	11	60728398	60732951	protein_coding	mitochondrial elongation factor 2 [Source:MGI Symbol;Acc:MGI:2144199]
ENSMUSG00000002661	249.627	180.854	228.681	204.846	156.949	142.287	294.091	149.985	365.399	237.084	193.874	261.64	-0.432511	0.0775576	0.999941	Alkbh7	17	56997339	56999322	protein_coding	alkB homolog 7 [Source:MGI Symbol;Acc:MGI:1913650]
ENSMUSG00000079610	128.776	127.375	133.008	154.86	155.023	154.145	188.218	166.123	168.571	153.927	142.198	169.21	-0.24817	0.0775651	0.999941	Ankrd39	1	36537507	36547445	protein_coding	ankyrin repeat domain 39 [Source:MGI Symbol;Acc:MGI:1914816]
ENSMUSG00000073002	24.7646	18.4743	51.3365	38.2249	33.7006	37.5481	55.61	36.0723	53.5918	47.7706	34.0082	48.2612	-0.50976	0.0777008	0.999941	Vamp5	6	72368794	72380468	protein_coding	vesicle-associated membrane protein 5 [Source:MGI Symbol;Acc:MGI:1858622]
ENSMUSG00000066196	31.6987	45.6996	37.3356	36.2647	29.8491	27.667	36.3604	52.21	60.4126	39.8088	34.7525	47.1979	-0.443587	0.0777077	0.999941	Spag8	4	43651335	43653594	protein_coding	sperm associated antigen 8 [Source:MGI Symbol;Acc:MGI:3056295]
ENSMUSG00000026208	25.7552	22.3636	42.0026	38.2249	22.1461	42.4886	39.5686	49.3621	57.4894	35.3856	32.1635	45.4514	-0.503122	0.077719	0.999941	Des	1	75360329	75368579	protein_coding	desmin [Source:MGI Symbol;Acc:MGI:94885]
ENSMUSG00000022475	573.548	578.538	472.529	670.406	732.748	611.638	661.972	673.983	759.055	779.368	606.568	718.595	-0.244024	0.0777481	0.999941	Hdac7	15	97792664	97844502	protein_coding	histone deacetylase 7 [Source:MGI Symbol;Acc:MGI:1891835]
ENSMUSG00000051223	3004.44	3499.42	3269.2	3359.87	3347.92	3562.13	2841.45	3072.79	3025.5	3128.09	3340.5	3016.96	0.146873	0.0777554	0.999941	Bzw1	1	58392898	58407353	protein_coding	basic leucine zipper and W2 domains 1 [Source:MGI Symbol;Acc:MGI:1914132]
ENSMUSG00000030752	70.3314	84.5929	45.5028	96.0524	93.3989	83.001	97.3174	112.963	108.158	91.1179	78.8132	102.389	-0.372753	0.0778127	0.999941	Kdm8	7	125444676	125462269	protein_coding	lysine (K)-specific demethylase 8 [Source:MGI Symbol;Acc:MGI:1924285]
ENSMUSG00000071253	682.512	878.988	866.887	974.245	726.971	783.569	653.417	683.476	728.848	738.674	818.862	701.104	0.223537	0.0778226	0.999941	Slc25a16	10	62920633	62946498	protein_coding	solute carrier family 25 (mitochondrial carrier, Graves disease autoantigen), member 16 [Source:MGI Symbol;Acc:MGI:1920382]
ENSMUSG00000050730	279.345	338.372	297.518	286.197	317.749	372.516	270.564	269.593	302.063	222.045	315.283	266.066	0.246207	0.0778347	0.999941	Arhgap42	9	8994329	9239101	protein_coding	Rho GTPase activating protein 42 [Source:MGI Symbol;Acc:MGI:1918794]
ENSMUSG00000043822	107.974	91.3992	80.505	98.9927	115.545	100.787	112.289	107.268	116.928	155.697	99.2004	123.045	-0.310923	0.0778697	0.999941	Adamtsl5	10	80339110	80348412	protein_coding	ADAMTS-like 5 [Source:MGI Symbol;Acc:MGI:1913798]
ENSMUSG00000032068	1.98117	5.83399	10.5006	3.9205	7.703	5.92864	1.06942	0.949272	1.94879	5.30784	5.97799	2.31883	1.32537	0.0779924	0.999941	Plet1	9	50494525	50505482	protein_coding	placenta expressed transcript 1 [Source:MGI Symbol;Acc:MGI:1923759]
ENSMUSG00000074277	2.97175	1.94466	1.16674	6.86088	2.88863	0	0	0.949272	0.974396	0	2.63878	0.480917	2.44799	0.0780302	0.999941	Phldb3	7	24610763	24629297	protein_coding	pleckstrin homology like domain, family B, member 3 [Source:MGI Symbol;Acc:MGI:3642959]
ENSMUSG00000037820	203.07	135.154	176.178	126.436	181.021	143.276	153.997	123.405	121.8	116.772	160.856	128.994	0.319749	0.0783218	0.999941	Tgm2	2	158116402	158146436	protein_coding	transglutaminase 2, C polypeptide [Source:MGI Symbol;Acc:MGI:98731]
ENSMUSG00000031165	28.7269	22.3636	21.0013	21.5628	24.0719	9.88107	9.6248	19.9347	11.6928	12.385	21.2679	13.4093	0.661089	0.0783276	0.999941	Was	X	8081453	8090498	protein_coding	Wiskott-Aldrich syndrome [Source:MGI Symbol;Acc:MGI:105059]
ENSMUSG00000052270	0.990583	5.83399	11.6674	14.7019	3.8515	3.95243	0	2.84782	5.84638	0	6.83296	2.17355	1.6462	0.0783852	0.999941	Fpr2	17	17887824	17893952	protein_coding	formyl peptide receptor 2 [Source:MGI Symbol;Acc:MGI:1278319]
ENSMUSG00000033417	1222.38	1433.22	1190.07	1183.01	1316.25	1306.28	1177.43	1242.6	983.166	1064.22	1275.2	1116.85	0.191634	0.0784469	0.999941	Cacul1	19	60524696	60581023	protein_coding	CDK2 associated, cullin domain 1 [Source:MGI Symbol;Acc:MGI:1926082]
ENSMUSG00000000384	554.727	551.312	529.699	509.666	546.913	552.352	627.751	538.237	624.588	642.249	540.778	608.206	-0.169329	0.0785497	0.999941	Tbrg4	11	6615598	6626067	protein_coding	transforming growth factor beta regulated gene 4 [Source:MGI Symbol;Acc:MGI:1100868]
ENSMUSG00000025810	394.252	424.909	373.356	255.813	418.851	389.314	272.703	394.897	195.854	306.97	376.083	292.606	0.361643	0.0785507	0.999941	Nrp1	8	128358604	128503363	protein_coding	neuropilin 1 [Source:MGI Symbol;Acc:MGI:106206]
ENSMUSG00000038903	1.98117	0	3.50022	2.94038	1.92575	4.94053	1.06942	0.949272	0	0	2.54801	0.504674	2.38407	0.078567	0.999941	Ccdc68	18	69925426	69969484	protein_coding	coiled-coil domain containing 68 [Source:MGI Symbol;Acc:MGI:3612676]
ENSMUSG00000027499	3486.85	3759.04	4244.6	4395.87	3782.17	4604.58	3081.01	3624.32	3893.69	3410.29	4045.52	3502.33	0.207909	0.0786904	0.999941	Pkia	3	7366669	7445366	protein_coding	protein kinase inhibitor, alpha [Source:MGI Symbol;Acc:MGI:104747]
ENSMUSG00000090326	1.98117	0	0	0.980126	0.962875	0.988107	3.20827	5.69563	0.974396	2.65392	0.818712	3.13305	-1.91401	0.0788779	0.999941	Dthd1	5	62813823	62888308	protein_coding	death domain containing 1 [Source:MGI Symbol;Acc:MGI:4937018]
ENSMUSG00000009114	0.990583	4.86166	1.16674	1.96025	0	0.988107	9.6248	1.89854	4.87198	3.53856	1.66122	4.98347	-1.56532	0.0790143	0.999941	2610028H24Rik	10	76449081	76461110	protein_coding	RIKEN cDNA 2610028H24 gene [Source:MGI Symbol;Acc:MGI:1924214]
ENSMUSG00000029071	1877.16	1826.04	1587.93	1726	1736.06	1585.91	1958.11	1857.73	1857.2	2014.33	1723.18	1921.84	-0.157224	0.0790165	0.999941	Dvl1	4	155847402	155859303	protein_coding	dishevelled segment polarity protein 1 [Source:MGI Symbol;Acc:MGI:94941]
ENSMUSG00000069072	2297.16	2672.94	2564.49	2160.2	2428.37	2445.56	1922.82	2632.33	1732.48	1954.17	2428.12	2060.45	0.236766	0.0790558	0.999941	Slc7a14	3	31202858	31310378	protein_coding	solute carrier family 7 (cationic amino acid transporter, y+ system), member 14 [Source:MGI Symbol;Acc:MGI:3040688]
ENSMUSG00000019055	413.073	308.229	322.02	291.097	378.41	226.276	372.159	424.325	379.04	411.358	323.184	396.72	-0.296009	0.0790795	0.999941	Plod1	4	147909753	147936767	protein_coding	procollagen-lysine, 2-oxoglutarate 5-dioxygenase 1 [Source:MGI Symbol;Acc:MGI:99907]
ENSMUSG00000043929	309.062	427.826	448.028	450.858	381.299	456.505	271.633	350.281	408.272	326.432	412.263	339.155	0.280739	0.0793041	0.999941	Klhl15	X	94234599	94277724	protein_coding	kelch-like 15 [Source:MGI Symbol;Acc:MGI:1923400]
ENSMUSG00000041801	570.576	465.747	362.856	492.023	347.598	308.289	719.721	345.535	655.769	528.13	424.515	562.289	-0.404846	0.0793364	0.999941	Phlda3	1	135766119	135769136	protein_coding	pleckstrin homology like domain, family A, member 3 [Source:MGI Symbol;Acc:MGI:1351485]
ENSMUSG00000021365	149.578	207.107	169.177	170.542	148.283	216.395	148.65	166.123	114.979	143.312	176.847	143.266	0.30402	0.0794748	0.999941	Nedd9	13	41309581	41487362	protein_coding	neural precursor cell expressed, developmentally down-regulated gene 9 [Source:MGI Symbol;Acc:MGI:97302]
ENSMUSG00000078500	0	0	3.50022	0	8.66588	8.89296	0	0.949272	0	0.88464	3.50984	0.458478	2.87506	0.079547	0.999941	Zfp986	4	145868794	145899975	protein_coding	zinc finger protein 986 [Source:MGI Symbol;Acc:MGI:3649925]
ENSMUSG00000005131	10.8964	15.5573	12.8341	14.7019	10.5916	5.92864	6.41653	7.59418	6.82077	6.19248	11.7517	6.75599	0.797595	0.0795647	0.999941	4930550C14Rik	9	53402325	53434402	protein_coding	RIKEN cDNA 4930550C14 gene [Source:MGI Symbol;Acc:MGI:1922561]
ENSMUSG00000059203	43.5857	70.9802	37.3356	62.7281	57.7725	40.5124	40.638	30.3767	45.7966	36.2702	52.1524	38.2704	0.45212	0.079691	0.999941	Il1rapl2	X	137570608	138846946	protein_coding	interleukin 1 receptor accessory protein-like 2 [Source:MGI Symbol;Acc:MGI:1913106]
ENSMUSG00000020653	110.945	147.794	131.841	125.456	151.171	117.585	226.718	131	142.262	159.235	130.799	164.804	-0.330837	0.0798518	0.999941	Klf11	12	24651274	24662789	protein_coding	Kruppel-like factor 11 [Source:MGI Symbol;Acc:MGI:2653368]
ENSMUSG00000041771	387.318	410.324	322.02	338.144	353.375	351.766	254.522	424.325	193.905	259.2	360.491	282.988	0.349116	0.0799422	0.999941	Slc24a4	12	102128733	102267091	protein_coding	solute carrier family 24 (sodium/potassium/calcium exchanger), member 4 [Source:MGI Symbol;Acc:MGI:2447362]
ENSMUSG00000026034	2073.29	1973.83	2088.46	2503.24	2471.7	3467.27	1389.18	1940.31	2239.16	2136.41	2429.63	1926.26	0.334825	0.0799965	0.999941	Clk1	1	58410189	58424066	protein_coding	CDC-like kinase 1 [Source:MGI Symbol;Acc:MGI:107403]
ENSMUSG00000074682	192.173	202.245	175.011	203.866	152.134	161.061	280.189	186.057	197.802	220.275	181.082	221.081	-0.286164	0.0800167	0.999941	Zcchc3	2	152411955	152415027	protein_coding	zinc finger, CCHC domain containing 3 [Source:MGI Symbol;Acc:MGI:1915167]
ENSMUSG00000024222	907.374	695.217	831.885	747.836	480.475	431.803	742.179	411.035	444.325	434.358	682.432	507.974	0.426327	0.080133	0.999941	Fkbp5	17	28399094	28517527	protein_coding	FK506 binding protein 5 [Source:MGI Symbol;Acc:MGI:104670]
ENSMUSG00000014907	287.269	316.008	296.352	322.462	291.751	301.373	258.8	253.456	276.729	275.123	302.536	266.027	0.185319	0.0801551	0.999941	Naf1	8	66860217	66890564	protein_coding	nuclear assembly factor 1 ribonucleoprotein [Source:MGI Symbol;Acc:MGI:2682306]
ENSMUSG00000029679	0	0	0	0	0	0	2.13884	0	1.94879	3.53856	0	1.90655	-3.3645	0.0802653	0.999941	Hyal6	6	24733245	24745452	protein_coding	hyaluronoglucosaminidase 6 [Source:MGI Symbol;Acc:MGI:1921659]
ENSMUSG00000032750	10.8964	20.419	11.6674	23.523	18.2946	29.6432	11.7636	18.9854	7.79517	7.07712	19.0739	11.4053	0.749449	0.0802669	0.999941	Gab3	X	74966843	75085458	protein_coding	growth factor receptor bound protein 2-associated protein 3 [Source:MGI Symbol;Acc:MGI:2387324]
ENSMUSG00000014074	622.086	812.87	775.881	717.452	671.124	808.271	657.695	601.839	631.409	667.903	734.614	639.711	0.199347	0.0805688	0.999941	Rnf168	16	32277459	32301434	protein_coding	ring finger protein 168 [Source:MGI Symbol;Acc:MGI:1917488]
ENSMUSG00000078578	4349.65	4739.15	4745.13	5075.09	4720.01	5138.16	4193.2	4353.36	4590.38	4216.19	4794.53	4338.29	0.14427	0.0806253	0.999941	Ube2d3	3	135438149	135468198	protein_coding	ubiquitin-conjugating enzyme E2D 3 [Source:MGI Symbol;Acc:MGI:1913355]
ENSMUSG00000024137	475.48	345.178	357.022	442.037	412.111	389.314	495.143	470.839	419.965	503.36	403.524	472.327	-0.226616	0.080638	0.999941	E4f1	17	24443778	24470313	protein_coding	E4F transcription factor 1 [Source:MGI Symbol;Acc:MGI:109530]
ENSMUSG00000035296	3.96233	3.88933	0	8.82114	5.77725	3.95243	9.6248	6.6449	7.79517	12.385	4.40041	9.11246	-1.03197	0.0806547	0.999941	Sgcg	14	61219115	61258490	protein_coding	sarcoglycan, gamma (dystrophin-associated glycoprotein) [Source:MGI Symbol;Acc:MGI:1346524]
ENSMUSG00000066735	1300.64	1462.39	1293.91	1326.11	1334.54	1519.71	1182.78	1360.31	1069.89	1224.34	1372.88	1209.33	0.182997	0.0806779	0.999941	Vkorc1l1	5	129941970	129986692	protein_coding	vitamin K epoxide reductase complex, subunit 1-like 1 [Source:MGI Symbol;Acc:MGI:1916818]
ENSMUSG00000020839	0.990583	1.94466	1.16674	0	1.92575	1.97621	0	0	0	0	1.33399	0	2.90898	0.0806862	0.999941	Tmigd1	11	76902159	76916587	protein_coding	transmembrane and immunoglobulin domain containing 1 [Source:MGI Symbol;Acc:MGI:1913851]
ENSMUSG00000045284	1239.22	1405.02	1463.09	1133.03	1078.42	1210.43	1226.63	992.939	1118.61	950.103	1254.87	1072.07	0.227266	0.0807405	0.999941	Dcaf12l1	X	44786570	44790197	protein_coding	DDB1 and CUL4 associated factor 12-like 1 [Source:MGI Symbol;Acc:MGI:2444462]
ENSMUSG00000057116	0	0.972332	0	0.980126	0	0	7.48596	0	3.89758	0	0.32541	2.84589	-2.96555	0.0807928	0.999941	AF366264	8	13835233	13838389	protein_coding	cDNA sequence AF366264 [Source:MGI Symbol;Acc:MGI:2667157]
ENSMUSG00000019796	2958.87	3229.11	3018.35	2744.35	2847.22	2785.47	2687.46	2784.22	2535.38	2579.61	2930.56	2646.67	0.146993	0.0808147	0.999941	Lrp11	10	7589800	7625483	protein_coding	low density lipoprotein receptor-related protein 11 [Source:MGI Symbol;Acc:MGI:2442989]
ENSMUSG00000040163	0.990583	0	0	0	0	0	3.20827	0.949272	1.94879	0.88464	0.165097	1.74774	-2.7437	0.0809926	0.999941	1700034J05Rik	6	146950329	146954422	protein_coding	RIKEN cDNA 1700034J05 gene [Source:MGI Symbol;Acc:MGI:1920594]
ENSMUSG00000052146	57.4538	44.7273	47.8363	53.9069	35.6264	41.5005	73.7901	48.4129	63.3358	59.2709	46.8419	61.2024	-0.383652	0.0809979	0.999941	Rps10	17	27630418	27636669	protein_coding	ribosomal protein S10 [Source:MGI Symbol;Acc:MGI:1914347]
ENSMUSG00000025213	102.03	98.2055	115.507	127.416	98.2133	99.7988	159.344	108.217	154.929	109.695	106.862	133.046	-0.314186	0.08102	0.999941	Kazald1	19	45075241	45079289	protein_coding	Kazal-type serine peptidase inhibitor domain 1 [Source:MGI Symbol;Acc:MGI:2147606]
ENSMUSG00000079415	0	0.972332	0	0	0.962875	0.988107	1.06942	1.89854	2.92319	3.53856	0.487219	2.35743	-2.24085	0.0810674	0.999941	Cntf	19	12763660	12765632	protein_coding	ciliary neurotrophic factor [Source:MGI Symbol;Acc:MGI:88439]
ENSMUSG00000029804	2837.03	3499.42	3375.38	3109.94	3329.62	3315.1	2556.99	3042.42	2816.01	3075.89	3244.41	2872.83	0.175257	0.081091	0.999941	Herc3	6	58831465	58920398	protein_coding	hect domain and RLD 3 [Source:MGI Symbol;Acc:MGI:1921248]
ENSMUSG00000035778	104.011	130.292	126.008	79.3902	62.5869	97.8226	72.7207	83.5359	78.9261	69.0019	100.019	76.0462	0.393284	0.0812145	0.999941	Ggta1	2	35400179	35463231	protein_coding	glycoprotein galactosyltransferase alpha 1, 3 [Source:MGI Symbol;Acc:MGI:95704]
ENSMUSG00000029205	0.990583	0	0	0	0	0.988107	3.20827	1.89854	1.94879	0.88464	0.329782	1.98506	-2.44682	0.0812502	0.999941	Chrna9	5	65934921	65977326	protein_coding	cholinergic receptor, nicotinic, alpha polypeptide 9 [Source:MGI Symbol;Acc:MGI:1202403]
ENSMUSG00000032649	174.343	158.49	142.342	130.357	155.986	154.145	124.053	131	112.056	143.312	152.61	127.605	0.257283	0.081621	0.999941	Colgalt2	1	152399830	152510695	protein_coding	collagen beta(1-O)galactosyltransferase 2 [Source:MGI Symbol;Acc:MGI:2138232]
ENSMUSG00000050424	7.92467	3.88933	9.33391	10.7814	3.8515	7.90486	5.34711	3.79709	0.974396	3.53856	7.28094	3.41429	1.09597	0.0818013	0.999941	Pnma5	X	73033981	73037103	protein_coding	paraneoplastic antigen family 5 [Source:MGI Symbol;Acc:MGI:2180566]
ENSMUSG00000025158	881.619	902.324	831.885	821.346	852.144	716.378	1076.91	814.475	1020.19	934.18	834.283	961.439	-0.204201	0.0818286	0.999941	Rfng	11	120780746	120784207	protein_coding	RFNG O-fucosylpeptide 3-beta-N-acetylglucosaminyltransferase [Source:MGI Symbol;Acc:MGI:894275]
ENSMUSG00000059412	57.4538	31.1146	33.8354	35.2845	53.921	26.6789	27.805	23.7318	31.1807	29.1931	39.7147	27.9776	0.507212	0.0819505	0.999941	Fxyd2	9	45399669	45410278	protein_coding	FXYD domain-containing ion transport regulator 2 [Source:MGI Symbol;Acc:MGI:1195260]
ENSMUSG00000030357	2655.75	1858.13	2209.8	1988.68	1997.97	1608.64	2596.56	2034.29	2583.12	2657.46	2053.16	2467.86	-0.265472	0.0820819	0.999941	Fkbp4	6	128429735	128438677	protein_coding	FK506 binding protein 4 [Source:MGI Symbol;Acc:MGI:95543]
ENSMUSG00000033088	151.559	144.877	92.1724	238.171	223.387	183.788	166.83	272.441	227.034	267.161	172.326	233.367	-0.436697	0.0821526	0.999941	Triobp	15	78947724	79005869	protein_coding	TRIO and F-actin binding protein [Source:MGI Symbol;Acc:MGI:1349410]
ENSMUSG00000017713	70.3314	86.5375	82.8385	108.794	70.2899	55.334	108.012	64.5505	133.492	118.542	79.0209	106.149	-0.426014	0.0821574	0.999941	Tha1	11	117867952	117873481	protein_coding	threonine aldolase 1 [Source:MGI Symbol;Acc:MGI:1919026]
ENSMUSG00000056014	277.363	284.893	316.186	356.766	266.716	285.563	222.44	259.151	284.524	246.815	297.915	253.232	0.2333	0.0821862	0.999941	A430033K04Rik	5	138622859	138652414	protein_coding	RIKEN cDNA A430033K04 gene [Source:MGI Symbol;Acc:MGI:3583896]
ENSMUSG00000020530	1908.85	1817.29	2098.96	2187.64	1796.72	2228.18	1731.39	1669.77	1920.53	1748.05	2006.28	1767.44	0.18276	0.0821981	0.999941	Ggnbp2	11	84832361	84870817	protein_coding	gametogenetin binding protein 2 [Source:MGI Symbol;Acc:MGI:2387356]
ENSMUSG00000040860	1420.5	1152.21	858.72	709.611	953.246	758.866	1465.11	1155.26	1093.27	1253.54	975.526	1241.8	-0.347955	0.0822721	0.999941	Crocc	4	141016637	141060550	protein_coding	ciliary rootlet coiled-coil, rootletin [Source:MGI Symbol;Acc:MGI:3529431]
ENSMUSG00000022321	585.435	748.696	661.541	632.181	696.159	697.603	593.529	594.244	622.639	551.131	670.269	590.386	0.183523	0.0822945	0.999941	Cdh10	15	18818947	19014236	protein_coding	cadherin 10 [Source:MGI Symbol;Acc:MGI:107436]
ENSMUSG00000035279	44.5763	35.004	49.003	49.0063	38.515	33.5956	35.2909	27.5289	25.3343	35.3856	41.6167	30.8849	0.427652	0.0823175	0.999941	Ssc5d	7	4925785	4944826	protein_coding	scavenger receptor cysteine rich family, 5 domains [Source:MGI Symbol;Acc:MGI:3606211]
ENSMUSG00000033107	9.90583	20.419	4.66696	11.7615	18.2946	12.8454	7.48596	10.442	7.79517	2.65392	12.9822	7.09426	0.88881	0.0823965	0.999941	Rnf125	18	20944625	20983848	protein_coding	ring finger protein 125 [Source:MGI Symbol;Acc:MGI:1914914]
ENSMUSG00000028179	67.3597	70.0079	82.8385	64.6883	73.1785	55.334	57.7488	49.3621	46.771	62.8094	68.9011	54.1729	0.343339	0.0824778	0.999941	Cth	3	157894248	157925077	protein_coding	cystathionase (cystathionine gamma-lyase) [Source:MGI Symbol;Acc:MGI:1339968]
ENSMUSG00000073600	124.814	149.739	114.34	129.377	149.246	132.406	180.732	143.34	146.159	168.966	133.32	159.8	-0.258507	0.0825016	0.999941	Prob1	18	35650351	35655238	protein_coding	proline rich basic protein 1 [Source:MGI Symbol;Acc:MGI:2686460]
ENSMUSG00000055078	984.64	1195.97	1121.24	958.563	848.293	1002.93	973.174	769.86	925.676	818.292	1018.6	871.751	0.22478	0.0828862	0.999941	Gabra5	7	57407672	57510059	protein_coding	gamma-aminobutyric acid (GABA) A receptor, subunit alpha 5 [Source:MGI Symbol;Acc:MGI:95617]
ENSMUSG00000028771	607.228	607.707	738.546	672.367	711.565	886.332	441.671	647.404	580.74	656.403	703.957	581.555	0.274654	0.0829774	0.999941	Ptpn12	5	20986645	21055911	protein_coding	protein tyrosine phosphatase, non-receptor type 12 [Source:MGI Symbol;Acc:MGI:104673]
ENSMUSG00000020232	289.25	212.941	259.016	246.992	209.907	185.764	319.757	238.267	325.448	259.2	233.978	285.668	-0.287739	0.082979	0.999941	Hmg20b	10	81346048	81350480	protein_coding	high mobility group 20B [Source:MGI Symbol;Acc:MGI:1341190]
ENSMUSG00000040795	147.597	137.099	179.678	172.502	200.278	138.335	150.789	210.738	209.495	230.006	162.581	200.257	-0.303236	0.0830298	0.999941	Iqcc	4	129615126	129619099	protein_coding	IQ motif containing C [Source:MGI Symbol;Acc:MGI:2446212]
ENSMUSG00000037683	20.8023	24.3083	36.1689	15.682	12.5174	23.7146	21.3884	12.3405	9.74396	12.385	22.1989	13.9645	0.669277	0.0830868	0.999941	Armc3	2	19199302	19310241	protein_coding	armadillo repeat containing 3 [Source:MGI Symbol;Acc:MGI:1918132]
ENSMUSG00000015143	1388.8	1138.6	1456.09	967.385	1148.71	1163	1024.51	1219.81	783.415	970.45	1210.43	999.546	0.275893	0.0831115	0.999941	Actn1	12	80167547	80260371	protein_coding	actinin, alpha 1 [Source:MGI Symbol;Acc:MGI:2137706]
ENSMUSG00000071252	161.465	260.585	182.011	215.628	136.728	208.491	137.955	163.275	161.75	155.697	194.151	154.669	0.32763	0.0832618	0.999941	2210408I21Rik	13	77135540	77613784	protein_coding	RIKEN cDNA 2210408I21 gene [Source:MGI Symbol;Acc:MGI:1919621]
ENSMUSG00000021758	68.3503	53.4783	67.6709	50.9666	69.327	43.4767	38.4992	37.0216	50.6686	52.1938	58.8783	44.5958	0.396014	0.0833804	0.999941	Ddx4	13	112598333	112652475	protein_coding	DEAD (Asp-Glu-Ala-Asp) box polypeptide 4 [Source:MGI Symbol;Acc:MGI:102670]
ENSMUSG00000022361	1345.21	1513.92	1418.75	1365.32	1570.45	1743.02	1242.67	1426.76	1278.41	1296	1492.78	1310.96	0.187374	0.0834174	0.999941	Zhx1	15	58047003	58076541	protein_coding	zinc fingers and homeoboxes 1 [Source:MGI Symbol;Acc:MGI:109271]
ENSMUSG00000040118	3723.6	4217.98	3682.23	3121.7	4088.37	4119.42	3300.24	3756.27	3002.11	3213.9	3825.55	3318.13	0.205323	0.0834176	0.999941	Cacna2d1	5	15934691	16374511	protein_coding	calcium channel, voltage-dependent, alpha2/delta subunit 1 [Source:MGI Symbol;Acc:MGI:88295]
ENSMUSG00000026771	311.043	400.601	427.026	449.878	438.108	520.732	300.508	396.796	336.167	371.549	424.565	351.255	0.272681	0.0835593	0.999941	Spopl	2	23506220	23572106	protein_coding	speckle-type POZ protein-like [Source:MGI Symbol;Acc:MGI:1924107]
ENSMUSG00000044835	1037.14	1002.47	1083.9	871.332	1026.42	1003.92	881.204	911.301	929.574	866.947	1004.2	897.257	0.162144	0.0836451	0.999941	Ankrd45	1	161142691	161170498	protein_coding	ankyrin repeat domain 45 [Source:MGI Symbol;Acc:MGI:1921094]
ENSMUSG00000056895	255.571	232.387	386.191	254.833	199.315	195.645	347.562	282.883	411.195	268.046	253.99	327.422	-0.36761	0.0837044	0.999941	Hist3h2ba	11	58948920	58949533	protein_coding	histone cluster 3, H2ba [Source:MGI Symbol;Acc:MGI:1925553]
ENSMUSG00000050002	261.514	243.083	273.017	214.648	235.904	230.229	297.299	234.47	311.807	296.354	243.066	284.983	-0.230327	0.0837045	0.999941	Idnk	13	58157649	58164693	protein_coding	idnK gluconokinase homolog (E. coli) [Source:MGI Symbol;Acc:MGI:1922981]
ENSMUSG00000031871	189.201	147.794	126.008	150.939	237.83	214.419	109.081	152.833	113.03	170.736	177.699	136.42	0.380665	0.083845	0.999941	Cdh5	8	104101625	104144511	protein_coding	cadherin 5 [Source:MGI Symbol;Acc:MGI:105057]
ENSMUSG00000078945	28.7269	30.1423	31.5019	45.0858	35.6264	31.6194	20.319	28.4782	20.4623	28.3085	33.7838	24.392	0.465466	0.0838561	0.999941	Naip2	13	100144063	100202092	protein_coding	NLR family, apoptosis inhibitory protein 2 [Source:MGI Symbol;Acc:MGI:1298226]
ENSMUSG00000026805	24.7646	18.4743	15.1676	77.43	49.1066	44.4648	19.2496	74.0432	76.0029	100.849	38.2346	67.5362	-0.820482	0.0839285	0.999941	Barhl1	2	28907679	28916668	protein_coding	BarH like homeobox 1 [Source:MGI Symbol;Acc:MGI:1859288]
ENSMUSG00000028028	57.4538	68.0632	36.1689	100.953	101.102	98.8107	58.8182	63.6012	43.8478	52.1938	77.0919	54.6153	0.501124	0.0839802	0.999941	Alpk1	3	127670310	127780527	protein_coding	alpha-kinase 1 [Source:MGI Symbol;Acc:MGI:1918731]
ENSMUSG00000078762	27.7363	16.5296	16.3343	26.4634	25.0348	15.8097	27.805	18.0362	41.899	38.9242	21.318	31.6661	-0.56943	0.0839879	0.999941	Haus5	7	30653711	30664994	protein_coding	HAUS augmin-like complex, subunit 5 [Source:MGI Symbol;Acc:MGI:1919159]
ENSMUSG00000020592	26.7458	23.336	21.0013	50.9666	41.4036	36.56	35.2909	47.4636	63.3358	45.1166	33.3355	47.8017	-0.51685	0.0840922	0.999941	Sdc1	12	8771323	8793715	protein_coding	syndecan 1 [Source:MGI Symbol;Acc:MGI:1349162]
ENSMUSG00000014850	360.572	391.85	387.357	425.375	367.818	438.719	318.688	367.368	368.322	324.663	395.282	344.76	0.197154	0.0841391	0.999941	Msh3	13	92211872	92355003	protein_coding	mutS homolog 3 [Source:MGI Symbol;Acc:MGI:109519]
ENSMUSG00000022803	4.95292	4.86166	21.0013	9.80126	7.703	7.90486	3.20827	3.79709	3.89758	7.07712	9.37083	4.49502	1.02984	0.0841722	0.999941	Popdc2	16	38362209	38378216	protein_coding	popeye domain containing 2 [Source:MGI Symbol;Acc:MGI:1930150]
ENSMUSG00000048834	1863.29	2215.94	2139.8	1892.62	1741.84	1976.21	1808.39	1703.94	1781.2	1717.09	1971.62	1752.65	0.169761	0.0843426	0.999941	Vstm2a	11	16257724	16427310	protein_coding	V-set and transmembrane domain containing 2A [Source:MGI Symbol;Acc:MGI:2384826]
ENSMUSG00000019775	1688.94	1904.8	1988.12	1865.18	1975.82	2350.71	1468.32	2095.99	1406.05	1632.16	1962.26	1650.63	0.249339	0.0843905	0.999941	Rgs17	10	5825663	5922400	protein_coding	regulator of G-protein signaling 17 [Source:MGI Symbol;Acc:MGI:1927469]
ENSMUSG00000042417	26.7458	41.8103	23.3348	29.4038	18.2946	17.7859	85.5538	26.5796	38.0015	21.2314	26.2292	42.8416	-0.699954	0.0843949	0.999941	Ccno	13	112987802	112990777	protein_coding	cyclin O [Source:MGI Symbol;Acc:MGI:2145534]
ENSMUSG00000019846	88.1619	116.68	117.841	105.854	124.211	132.406	94.1092	103.471	83.7981	92.0026	114.192	93.3451	0.290548	0.084507	0.999941	Lama4	10	38965515	39110188	protein_coding	laminin, alpha 4 [Source:MGI Symbol;Acc:MGI:109321]
ENSMUSG00000062908	700.342	557.146	676.709	600.817	604.686	563.221	700.472	622.723	759.055	753.713	617.153	708.991	-0.200745	0.0846724	0.999941	Acadm	3	153922357	153944632	protein_coding	acyl-Coenzyme A dehydrogenase, medium chain [Source:MGI Symbol;Acc:MGI:87867]
ENSMUSG00000039633	583.454	540.617	473.696	427.335	429.442	436.743	403.172	407.238	407.298	433.474	481.881	412.795	0.222982	0.0847319	0.999941	Lonrf1	8	36216064	36249516	protein_coding	LON peptidase N-terminal domain and ring finger 1 [Source:MGI Symbol;Acc:MGI:3609241]
ENSMUSG00000006587	20.8023	14.585	12.8341	1.96025	6.74013	3.95243	4.27769	0.949272	2.92319	8.8464	10.1457	4.24914	1.24276	0.0848256	0.999941	Snai3	8	122454208	122460733	protein_coding	snail family zinc finger 3 [Source:MGI Symbol;Acc:MGI:1353563]
ENSMUSG00000011305	21.7928	17.502	14.0009	14.7019	12.5174	8.89296	23.5273	17.0869	19.4879	30.0778	14.9013	22.545	-0.599124	0.0848672	0.999941	Plin5	17	56111601	56117596	protein_coding	perilipin 5 [Source:MGI Symbol;Acc:MGI:1914218]
ENSMUSG00000026158	3281.8	3237.87	4129.09	3523.55	3440.35	3818.05	3155.87	3237.02	3145.35	3170.55	3571.78	3177.2	0.168698	0.0849953	0.999941	Ogfrl1	1	23366424	23397772	protein_coding	opioid growth factor receptor-like 1 [Source:MGI Symbol;Acc:MGI:1917405]
ENSMUSG00000064356	26.7458	42.7826	42.0026	17.6423	15.406	20.7502	50.2628	26.5796	48.7198	40.6934	27.5549	41.5639	-0.596772	0.085201	0.999941	mt-Atp8	MT	7766	7969	protein_coding	mitochondrially encoded ATP synthase 8 [Source:MGI Symbol;Acc:MGI:99926]
ENSMUSG00000005699	442.791	380.182	443.361	443.997	346.635	298.408	512.253	356.926	574.894	484.783	392.562	482.214	-0.296943	0.085207	0.999941	Pard6a	8	105701148	105703496	protein_coding	par-6 family cell polarity regulator alpha [Source:MGI Symbol;Acc:MGI:1927223]
ENSMUSG00000034422	93.1148	63.2016	54.8367	62.7281	93.3989	90.9058	42.7769	77.8403	53.5918	53.963	76.3643	57.043	0.420751	0.0853312	0.999941	Parp14	16	35832874	35871544	protein_coding	poly (ADP-ribose) polymerase family, member 14 [Source:MGI Symbol;Acc:MGI:1919489]
ENSMUSG00000030753	1347.19	1574.21	1389.59	1610.35	1527.12	1637.29	1275.82	1369.8	1370	1390.65	1514.29	1351.57	0.164044	0.0854507	0.999941	Thap12	7	98703103	98718062	protein_coding	THAP domain containing 12 [Source:MGI Symbol;Acc:MGI:1920231]
ENSMUSG00000020156	646.851	607.707	621.872	620.42	614.314	520.732	672.667	650.251	681.103	720.097	605.316	681.029	-0.170424	0.085462	0.999941	Mum1	10	80226434	80243903	protein_coding	melanoma associated antigen (mutated) 1 [Source:MGI Symbol;Acc:MGI:1915364]
ENSMUSG00000022523	2561.65	3155.22	2955.35	2673.78	2792.34	2860.57	2609.39	2563.98	2497.38	2536.26	2833.15	2551.75	0.150897	0.0855416	0.999941	Fgf12	16	28160098	28753068	protein_coding	fibroblast growth factor 12 [Source:MGI Symbol;Acc:MGI:109183]
ENSMUSG00000021395	3485.86	4059.49	3402.21	3786.23	3761.95	3865.47	3197.57	3647.1	3085.91	3404.1	3726.87	3333.67	0.160877	0.0855435	0.999941	Spin1	13	51100880	51152546	protein_coding	spindlin 1 [Source:MGI Symbol;Acc:MGI:109242]
ENSMUSG00000046714	18.8211	35.004	30.3352	31.364	22.1461	21.7384	29.9438	33.2245	42.8734	40.6934	26.5681	36.6838	-0.470431	0.0855848	0.999941	Foxc2	8	121116171	121118895	protein_coding	forkhead box C2 [Source:MGI Symbol;Acc:MGI:1347481]
ENSMUSG00000045302	1044.07	1019.98	1124.74	966.404	968.652	807.283	1112.2	1031.86	1308.61	1121.72	988.521	1143.6	-0.210554	0.0856053	0.999941	Preb	5	30950853	30960361	protein_coding	prolactin regulatory element binding [Source:MGI Symbol;Acc:MGI:1355326]
ENSMUSG00000026787	4799.38	4742.06	5349.5	4929.05	4438.85	5535.37	3941.89	5077.66	4083.69	4288.74	4965.7	4347.99	0.191522	0.0859147	0.999941	Gad2	2	22622205	22693874	protein_coding	glutamic acid decarboxylase 2 [Source:MGI Symbol;Acc:MGI:95634]
ENSMUSG00000026928	57.4538	43.7549	30.3352	66.6486	53.921	48.4172	64.1653	56.0071	70.1565	74.3098	50.0885	66.1597	-0.397272	0.0859358	0.999941	Card9	2	26352176	26360918	protein_coding	caspase recruitment domain family, member 9 [Source:MGI Symbol;Acc:MGI:2685628]
ENSMUSG00000027006	1535.4	1745.34	1892.45	1825.98	1742.8	1907.05	1552.8	1555.86	1605.8	1642.78	1774.84	1589.31	0.159015	0.085983	0.999941	Dnajc10	2	80315466	80354043	protein_coding	DnaJ heat shock protein family (Hsp40) member C10 [Source:MGI Symbol;Acc:MGI:1914111]
ENSMUSG00000083193	0	1.94466	0	0	0	1.97621	4.27769	0.949272	3.89758	2.65392	0.65348	2.94462	-2.14185	0.0860175	0.999941	4930595D18Rik	12	111159850	111184491	protein_coding	RIKEN cDNA 4930595D18 gene [Source:MGI Symbol;Acc:MGI:1925312]
ENSMUSG00000062190	1395.73	1706.44	2234.3	1558.4	1504.01	1504.89	1470.46	1309.05	1434.31	1344.65	1650.63	1389.62	0.248043	0.0860204	0.999941	Lancl2	6	57702540	57739439	protein_coding	LanC (bacterial lantibiotic synthetase component C)-like 2 [Source:MGI Symbol;Acc:MGI:1919085]
ENSMUSG00000020986	1930.65	2091.49	2111.8	2086.69	1983.52	2207.43	1690.76	1961.2	1926.38	1890.48	2068.6	1867.2	0.147457	0.0860515	0.999941	Sec23a	12	58958383	59012017	protein_coding	SEC23 homolog A, COPII coat complex component [Source:MGI Symbol;Acc:MGI:1349635]
ENSMUSG00000041926	556.708	443.383	579.869	534.169	524.767	496.03	558.238	580.955	586.587	667.019	522.488	598.2	-0.19652	0.0861369	0.999941	Rnpep	1	135262712	135284084	protein_coding	arginyl aminopeptidase (aminopeptidase B) [Source:MGI Symbol;Acc:MGI:2384902]
ENSMUSG00000079330	109.955	156.545	126.008	127.416	133.84	146.24	163.622	172.768	144.211	156.581	133.334	159.295	-0.255638	0.086155	0.999941	Lemd1	1	132191431	132259227	protein_coding	LEM domain containing 1 [Source:MGI Symbol;Acc:MGI:1922403]
ENSMUSG00000052544	236.749	252.806	227.514	195.045	234.942	314.218	202.121	229.724	188.058	189.313	243.546	202.304	0.268159	0.0861978	0.999941	St6galnac3	3	153198266	153725174	protein_coding	ST6 (alpha-N-acetyl-neuraminyl-2,3-beta-galactosyl-1,3)-N-acetylgalactosaminide alpha-2,6-sialyltransferase 3 [Source:MGI Symbol;Acc:MGI:1341828]
ENSMUSG00000032244	3205.53	3091.04	3157.2	2740.43	3147.64	3203.44	2447.91	3041.47	2559.74	2917.54	3090.88	2741.66	0.172727	0.0862333	0.999941	Fem1b	9	62791821	62811934	protein_coding	feminization 1 homolog b (C. elegans) [Source:MGI Symbol;Acc:MGI:1335087]
ENSMUSG00000021670	1805.83	1959.25	2103.63	1686.8	1710.07	1505.87	1623.38	1524.53	1531.75	1594.12	1795.24	1568.45	0.194602	0.086244	0.999941	Hmgcr	13	96648967	96670936	protein_coding	3-hydroxy-3-methylglutaryl-Coenzyme A reductase [Source:MGI Symbol;Acc:MGI:96159]
ENSMUSG00000027562	3530.44	3427.47	3657.73	3192.27	3824.54	3646.11	3399.69	3946.12	4772.59	4132.15	3546.43	4062.64	-0.19617	0.0863416	0.999941	Car2	3	14886273	14900770	protein_coding	carbonic anhydrase 2 [Source:MGI Symbol;Acc:MGI:88269]
ENSMUSG00000002580	256.561	173.075	171.511	160.741	128.062	116.597	245.967	124.355	293.293	255.661	167.758	229.819	-0.454156	0.0863712	0.999941	Mien1	11	98437708	98438991	protein_coding	migration and invasion enhancer 1 [Source:MGI Symbol;Acc:MGI:1913678]
ENSMUSG00000008035	1327.38	1212.5	1274.08	1187.91	931.1	919.928	1546.38	1071.73	1484.98	1402.15	1142.15	1376.31	-0.269091	0.0863855	0.999941	Mid1ip1	X	10715013	10719690	protein_coding	Mid1 interacting protein 1 (gastrulation specific G12-like (zebrafish)) [Source:MGI Symbol;Acc:MGI:1915291]
ENSMUSG00000004610	59.435	39.8656	40.8359	33.3243	44.2923	39.5243	67.3736	37.0216	65.2845	61.0402	42.8795	57.68	-0.425637	0.0864834	0.999941	Etfb	7	43444083	43457800	protein_coding	electron transferring flavoprotein, beta polypeptide [Source:MGI Symbol;Acc:MGI:106098]
ENSMUSG00000049411	108.964	110.846	114.34	123.496	137.691	134.383	81.2761	103.471	100.363	115.003	121.62	100.028	0.279138	0.0865377	0.999941	Tmem241	18	11964450	12121537	protein_coding	transmembrane protein 241 [Source:MGI Symbol;Acc:MGI:2442435]
ENSMUSG00000024982	475.48	380.182	544.867	401.852	464.106	476.268	395.686	430.02	340.064	389.242	457.126	388.753	0.232761	0.0865875	0.999941	Zdhhc6	19	55271291	55316032	protein_coding	zinc finger, DHHC domain containing 6 [Source:MGI Symbol;Acc:MGI:1914230]
ENSMUSG00000031610	383.356	373.375	645.207	379.309	292.714	337.933	373.228	243.963	308.884	314.047	401.982	310.031	0.373945	0.08675	0.999941	Scrg1	8	57455923	57477585	protein_coding	scrapie responsive gene 1 [Source:MGI Symbol;Acc:MGI:1328308]
ENSMUSG00000003949	3591.86	3803.76	2389.48	3403	3155.34	3556.2	3075.66	2963.63	2495.43	2656.57	3316.61	2797.82	0.245627	0.0868598	0.999941	Hlf	11	90336536	90390895	protein_coding	hepatic leukemia factor [Source:MGI Symbol;Acc:MGI:96108]
ENSMUSG00000026020	747.89	967.47	813.217	1016.39	845.404	877.439	769.984	762.266	802.902	730.713	877.969	766.466	0.196373	0.0869164	0.999941	Nop58	1	59684971	59719044	protein_coding	NOP58 ribonucleoprotein [Source:MGI Symbol;Acc:MGI:1933184]
ENSMUSG00000042828	12.8776	29.17	7.00043	44.1057	20.2204	9.88107	11.7636	13.2898	7.79517	12.385	20.5425	11.3084	0.865843	0.0870916	0.999941	Trim72	7	128003949	128011033	protein_coding	tripartite motif-containing 72 [Source:MGI Symbol;Acc:MGI:3612190]
ENSMUSG00000043004	2106.97	2562.09	1939.12	1927.91	1960.41	2039.45	1865.07	2057.07	1517.13	1740.97	2089.33	1795.06	0.219119	0.0870928	0.999941	Gng2	14	19872559	19977627	protein_coding	guanine nucleotide binding protein (G protein), gamma 2 [Source:MGI Symbol;Acc:MGI:102705]
ENSMUSG00000050840	343.732	340.316	275.35	329.322	419.814	378.445	372.159	443.31	379.04	452.051	347.83	411.64	-0.242549	0.0871474	0.999941	Cdh20	1	104768529	104995481	protein_coding	cadherin 20 [Source:MGI Symbol;Acc:MGI:1346069]
ENSMUSG00000022090	230.806	193.494	235.681	141.138	179.095	119.561	266.286	150.934	318.628	242.391	183.296	244.56	-0.416602	0.0873409	0.999941	Pdlim2	14	70164218	70177681	protein_coding	PDZ and LIM domain 2 [Source:MGI Symbol;Acc:MGI:2384850]
ENSMUSG00000020674	1170.87	1095.82	1066.4	787.041	1070.72	953.523	827.733	1055.59	695.719	836.87	1024.06	853.978	0.261858	0.0873713	0.999941	Pxdn	12	29937608	30017658	protein_coding	peroxidasin [Source:MGI Symbol;Acc:MGI:1916925]
ENSMUSG00000100241	69.3408	55.4229	72.3378	82.3306	72.2156	59.2864	83.4149	78.7896	100.363	78.733	68.489	85.3251	-0.317139	0.0873837	0.999941	Slc18a3	14	32462438	32464850	protein_coding	solute carrier family 18 (vesicular monoamine), member 3 [Source:MGI Symbol;Acc:MGI:1101061]
ENSMUSG00000049659	1696.87	1710.33	1810.78	1827.94	1953.67	2078.98	1476.87	1788.43	1645.76	1633.05	1846.43	1636.03	0.174375	0.0874055	0.999941	Aftph	11	20685084	20741589	protein_coding	aftiphilin [Source:MGI Symbol;Acc:MGI:1923012]
ENSMUSG00000024844	441.8	417.13	511.032	388.13	310.046	242.086	622.404	330.347	577.817	489.206	385.037	504.943	-0.391362	0.0874503	0.999941	Banf1	19	5364641	5366645	protein_coding	barrier to autointegration factor 1 [Source:MGI Symbol;Acc:MGI:1346330]
ENSMUSG00000025576	3680.02	3647.22	3266.87	3121.7	3043.65	2833.89	3922.64	3617.68	3585.78	3671.26	3265.56	3699.34	-0.179888	0.087452	0.999941	Rbfox3	11	118489762	118911597	protein_coding	RNA binding protein, fox-1 homolog (C. elegans) 3 [Source:MGI Symbol;Acc:MGI:106368]
ENSMUSG00000025008	445.763	450.19	393.191	423.414	412.111	494.053	366.812	409.136	404.374	346.779	436.454	381.775	0.19389	0.0875664	0.999941	Tctn3	19	40596446	40612233	protein_coding	tectonic family member 3 [Source:MGI Symbol;Acc:MGI:1914840]
ENSMUSG00000033227	44.5763	14.585	28.0017	36.2647	37.5521	24.7027	54.5405	36.0723	50.6686	37.1549	30.9471	44.6091	-0.523432	0.0876745	0.999941	Wnt6	1	74771892	74785322	protein_coding	wingless-type MMTV integration site family, member 6 [Source:MGI Symbol;Acc:MGI:98960]
ENSMUSG00000002266	248.636	207.107	156.343	186.224	189.686	300.385	153.997	223.079	115.953	165.428	214.73	164.614	0.383698	0.087768	0.999941	Zim1	7	6671269	6696450	protein_coding	zinc finger, imprinted 1 [Source:MGI Symbol;Acc:MGI:1341879]
ENSMUSG00000025727	21.7928	27.2253	15.1676	111.734	66.4384	56.3221	34.2215	98.7243	133.492	89.3486	49.7801	88.9467	-0.835967	0.0879313	0.999941	A930017K11Rik	17	25946387	25952565	protein_coding	RIKEN cDNA A930017K11 gene [Source:MGI Symbol;Acc:MGI:2442713]
ENSMUSG00000022562	529.962	517.281	355.855	493.003	446.774	349.79	648.07	497.419	524.225	507.783	448.778	544.374	-0.27734	0.0879665	0.999941	Oplah	15	76296601	76328015	protein_coding	5-oxoprolinase (ATP-hydrolysing) [Source:MGI Symbol;Acc:MGI:1922725]
ENSMUSG00000040434	10.8964	3.88933	8.16717	8.82114	5.77725	7.90486	10.6942	11.3913	11.6928	16.8082	7.57603	12.6466	-0.748557	0.0879796	0.999941	Large2	2	92365046	92374869	protein_coding	LARGE xylosyl- and glucuronyltransferase 2 [Source:MGI Symbol;Acc:MGI:2443769]
ENSMUSG00000056537	1054.97	1407.94	1228.58	1406.48	1214.19	1353.71	1122.89	1144.82	1085.48	1133.22	1277.64	1121.6	0.188003	0.0880907	0.999941	Rlim	X	103957163	103981284	protein_coding	ring finger protein, LIM domain interacting [Source:MGI Symbol;Acc:MGI:1342291]
ENSMUSG00000071267	296.184	398.656	473.696	466.54	405.37	581.007	276.98	354.078	386.835	381.28	436.909	349.794	0.31989	0.0882061	0.999941	Zfp942	17	21926960	21962464	protein_coding	zinc finger protein 942 [Source:MGI Symbol;Acc:MGI:1920483]
ENSMUSG00000049521	331.845	300.451	333.687	538.089	497.806	434.767	402.103	488.875	593.407	570.593	406.108	513.745	-0.339175	0.0882741	0.999941	Cdc42ep1	15	78842624	78850897	protein_coding	CDC42 effector protein (Rho GTPase binding) 1 [Source:MGI Symbol;Acc:MGI:1929763]
ENSMUSG00000060397	123.823	137.099	150.509	134.277	103.991	121.537	96.248	106.318	101.337	120.311	128.539	106.054	0.272922	0.0884512	0.999941	Zfp128	7	12881177	12893422	protein_coding	zinc finger protein 128 [Source:MGI Symbol;Acc:MGI:2389445]
ENSMUSG00000021453	292.222	210.996	326.687	176.423	163.689	128.454	620.265	150.934	280.626	257.43	216.412	327.314	-0.596752	0.0884608	0.999941	Gadd45g	13	51846678	51848468	protein_coding	growth arrest and DNA-damage-inducible 45 gamma [Source:MGI Symbol;Acc:MGI:1346325]
ENSMUSG00000045672	133.729	112.791	129.508	196.025	253.236	271.729	131.539	296.173	291.344	327.317	182.836	261.593	-0.517032	0.0884753	0.999941	Col27a1	4	63214004	63334991	protein_coding	collagen, type XXVII, alpha 1 [Source:MGI Symbol;Acc:MGI:2672118]
ENSMUSG00000060512	57.4538	66.1186	91.0056	37.2448	64.5126	50.3935	64.1653	94.9272	72.1053	95.5411	61.1215	81.6847	-0.425356	0.0888935	0.999941	0610040J01Rik	5	63812363	63899625	protein_coding	RIKEN cDNA 0610040J01 gene [Source:MGI Symbol;Acc:MGI:1923511]
ENSMUSG00000004221	642.889	777.866	711.711	805.664	843.479	826.057	641.653	742.331	640.178	658.172	767.944	670.584	0.195744	0.0889691	0.999941	Ikbkg	X	74393290	74453854	protein_coding	inhibitor of kappaB kinase gamma [Source:MGI Symbol;Acc:MGI:1338074]
ENSMUSG00000031389	48.5386	41.8103	29.1685	51.9467	52.9581	42.4886	58.8182	60.7534	46.771	66.348	44.4851	58.1727	-0.382939	0.0890563	0.999941	Arhgap4	X	73891442	73921870	protein_coding	Rho GTPase activating protein 4 [Source:MGI Symbol;Acc:MGI:2159577]
ENSMUSG00000070717	3.96233	2.917	1.16674	2.94038	0	0.988107	7.48596	6.6449	3.89758	2.65392	1.99576	5.17059	-1.35759	0.0891368	0.999941	Gm10300	4	132074697	132076992	protein_coding	predicted gene 10300 [Source:MGI Symbol;Acc:MGI:3641670]
ENSMUSG00000024875	253.589	223.636	240.348	256.793	198.352	168.966	265.217	251.557	323.5	240.622	223.614	270.224	-0.273228	0.0893599	0.999941	Yif1a	19	5088538	5092879	protein_coding	Yip1 interacting factor homolog A (S. cerevisiae) [Source:MGI Symbol;Acc:MGI:1915340]
ENSMUSG00000026933	2134.71	2056.48	1862.12	1774.03	2000.85	1820.09	1778.45	1916.58	1493.75	1651.62	1941.38	1710.1	0.183136	0.0894409	0.999941	Camsap1	2	25926838	25983282	protein_coding	calmodulin regulated spectrin-associated protein 1 [Source:MGI Symbol;Acc:MGI:3036242]
ENSMUSG00000005674	324.911	281.004	212.346	232.29	249.385	163.038	310.132	271.492	316.679	313.163	243.829	302.866	-0.312145	0.089496	0.999941	Tomm40l	1	171216011	171222514	protein_coding	translocase of outer mitochondrial membrane 40-like [Source:MGI Symbol;Acc:MGI:3589112]
ENSMUSG00000020734	1225.35	1205.69	905.389	2411.11	2359.04	1891.24	1449.07	2807.95	2483.74	2561.92	1666.3	2325.67	-0.480934	0.0895635	0.999941	Grin2c	11	115249169	115267243	protein_coding	glutamate receptor, ionotropic, NMDA2C (epsilon 3) [Source:MGI Symbol;Acc:MGI:95822]
ENSMUSG00000022705	5.9435	8.75099	4.66696	2.94038	6.74013	9.88107	0	3.79709	0	6.19248	6.48717	2.49739	1.33898	0.0896972	0.999941	Drd3	16	43754026	43822932	protein_coding	dopamine receptor D3 [Source:MGI Symbol;Acc:MGI:94925]
ENSMUSG00000050063	119.861	67.0909	189.012	135.257	189.686	185.764	68.443	235.419	359.552	253.007	147.779	229.105	-0.63384	0.0899255	0.999941	Klk6	7	43824499	43832030	protein_coding	kallikrein related-peptidase 6 [Source:MGI Symbol;Acc:MGI:1343166]
ENSMUSG00000064289	516.094	493.945	597.37	591.016	609.5	668.948	420.283	503.114	526.174	539.63	579.479	497.3	0.219667	0.0899415	0.999941	Tank	2	61578585	61654171	protein_coding	TRAF family member-associated Nf-kappa B activator [Source:MGI Symbol;Acc:MGI:107676]
ENSMUSG00000041187	102.03	102.095	66.5041	70.5691	87.6216	71.1437	72.7207	75.9418	50.6686	61.0402	83.3272	65.0928	0.359757	0.0900736	0.999941	Prkd2	7	16842902	16870464	protein_coding	protein kinase D2 [Source:MGI Symbol;Acc:MGI:2141917]
ENSMUSG00000024124	3.96233	2.917	8.16717	7.84101	3.8515	1.97621	10.6942	7.59418	9.74396	7.96176	4.78587	8.99853	-0.922228	0.0900975	0.999941	Prss30	17	23972126	23975230	protein_coding	protease, serine 30 [Source:MGI Symbol;Acc:MGI:1353645]
ENSMUSG00000002699	57.4538	47.6443	80.505	32.3442	46.218	28.6551	22.4579	39.8694	40.9246	30.0778	48.8034	33.3324	0.542561	0.090196	0.999941	Lcp2	11	34046920	34092295	protein_coding	lymphocyte cytosolic protein 2 [Source:MGI Symbol;Acc:MGI:1321402]
ENSMUSG00000021460	821.194	797.312	829.551	987.967	759.708	712.425	965.688	772.707	1115.68	992.566	818.026	961.661	-0.233381	0.0902024	0.999941	Auh	13	52835119	52929681	protein_coding	AU RNA binding protein/enoyl-coenzyme A hydratase [Source:MGI Symbol;Acc:MGI:1338011]
ENSMUSG00000060787	4.95292	4.86166	1.16674	0.980126	5.77725	6.91675	9.6248	6.6449	5.84638	11.5003	4.10924	8.4041	-1.01924	0.090259	0.999941	Olfr464	11	87913268	87920967	protein_coding	olfactory receptor 464 [Source:MGI Symbol;Acc:MGI:3030298]
ENSMUSG00000049551	142.644	112.791	123.674	132.317	104.953	84.9772	194.635	86.3838	173.443	161.004	116.893	153.866	-0.395702	0.0903265	0.999941	Fzd9	5	135248938	135251230	protein_coding	frizzled class receptor 9 [Source:MGI Symbol;Acc:MGI:1313278]
ENSMUSG00000020227	31.6987	33.0593	30.3352	20.5826	9.62875	24.7027	10.6942	10.442	24.3599	16.8082	25.0012	15.5761	0.676548	0.090392	0.999941	Irak3	10	120141648	120202130	protein_coding	interleukin-1 receptor-associated kinase 3 [Source:MGI Symbol;Acc:MGI:1921164]
ENSMUSG00000039628	2.97175	1.94466	3.50022	3.9205	2.88863	0.988107	7.48596	10.442	3.89758	2.65392	2.70231	6.11986	-1.17872	0.0904847	0.999941	Hs3st6	17	24753003	24758683	protein_coding	heparan sulfate (glucosamine) 3-O-sulfotransferase 6 [Source:MGI Symbol;Acc:MGI:3580487]
ENSMUSG00000001986	3183.73	3732.78	3254.03	3262.84	4061.41	3924.76	3237.14	3258.85	3031.35	3070.59	3569.93	3149.48	0.180915	0.09049	0.999941	Gria3	X	41400854	41678601	protein_coding	glutamate receptor, ionotropic, AMPA3 (alpha 3) [Source:MGI Symbol;Acc:MGI:95810]
ENSMUSG00000031446	1184.74	1262.09	1162.07	1331.99	1236.33	1424.85	1020.23	1209.37	1141.02	1133.22	1267.01	1125.96	0.170201	0.0905109	0.999941	Cul4a	8	13105621	13147940	protein_coding	cullin 4A [Source:MGI Symbol;Acc:MGI:1914487]
ENSMUSG00000045929	0	0	0	0	0.962875	0	0	3.79709	1.94879	1.76928	0.160479	1.87879	-2.86828	0.0905868	0.999941	Gm20715	7	6410277	6441691	protein_coding	predicted gene 20715 [Source:MGI Symbol;Acc:MGI:5313162]
ENSMUSG00000004864	9.90583	14.585	10.5006	32.3442	35.6264	22.7265	20.319	36.0723	43.8478	34.501	20.9481	33.685	-0.681699	0.0905924	0.999941	Mapk13	17	28769297	28780233	protein_coding	mitogen-activated protein kinase 13 [Source:MGI Symbol;Acc:MGI:1346864]
ENSMUSG00000022906	82.2184	56.3953	52.5032	64.6883	74.1414	79.0486	50.2628	62.652	49.6942	51.3091	68.1659	53.4795	0.352047	0.0907641	0.999941	Parp9	16	35938470	35972605	protein_coding	poly (ADP-ribose) polymerase family, member 9 [Source:MGI Symbol;Acc:MGI:1933117]
ENSMUSG00000059326	383.356	335.455	303.352	319.521	336.043	312.242	376.437	336.992	397.554	414.012	331.661	381.248	-0.200733	0.0908828	0.999941	Csf2ra	19	61224402	61228418	protein_coding	colony stimulating factor 2 receptor, alpha, low-affinity (granulocyte-macrophage) [Source:MGI Symbol;Acc:MGI:1339754]
ENSMUSG00000036323	1529.46	1696.72	1592.6	1456.47	1539.64	1759.82	1365.65	1572.94	1268.66	1450.81	1595.78	1414.52	0.173778	0.0909661	0.999941	Srp72	5	76974683	76999937	protein_coding	signal recognition particle 72 [Source:MGI Symbol;Acc:MGI:1333795]
ENSMUSG00000031891	0	1.94466	1.16674	2.94038	0.962875	1.97621	6.41653	1.89854	3.89758	4.4232	1.49848	4.15897	-1.45935	0.0909832	0.999941	Hsd11b2	8	105518755	105523988	protein_coding	hydroxysteroid 11-beta dehydrogenase 2 [Source:MGI Symbol;Acc:MGI:104720]
ENSMUSG00000042581	146.606	146.822	199.512	142.118	110.731	120.549	134.747	107.268	104.26	115.888	144.39	115.541	0.319843	0.0910535	0.999941	Thsd7b	1	129273302	130219278	protein_coding	thrombospondin, type I, domain containing 7B [Source:MGI Symbol;Acc:MGI:2443925]
ENSMUSG00000053128	58.4444	75.8419	45.5028	50.9666	51.0324	37.5481	75.929	60.7534	78.9261	62.8094	53.2227	69.6045	-0.3831	0.091054	0.999941	Rnf26	9	44095631	44113517	protein_coding	ring finger protein 26 [Source:MGI Symbol;Acc:MGI:2388131]
ENSMUSG00000036504	97.0772	80.7036	72.3378	125.456	110.731	65.2151	115.498	84.4852	164.673	123.85	91.9201	122.126	-0.408224	0.091093	0.999941	Phpt1	2	25573430	25575224	protein_coding	phosphohistidine phosphatase 1 [Source:MGI Symbol;Acc:MGI:1922704]
ENSMUSG00000030704	7863.25	9356.75	8843.88	8805.45	8013.05	9222	7862.39	7633.1	8144.98	7782.18	8684.06	7855.66	0.144634	0.0912192	0.999941	Rab6a	7	100607410	100641268	protein_coding	RAB6A, member RAS oncogene family [Source:MGI Symbol;Acc:MGI:894313]
ENSMUSG00000029725	255.571	182.798	270.683	148.979	138.654	99.7988	309.063	134.797	360.527	245.045	182.747	262.358	-0.522357	0.0912432	0.999941	Ppp1r35	5	137778849	137780110	protein_coding	protein phosphatase 1, regulatory subunit 35 [Source:MGI Symbol;Acc:MGI:1922853]
ENSMUSG00000078897	6.93408	14.585	14.0009	12.7416	19.2575	10.8692	7.48596	13.2898	3.89758	5.30784	13.0647	7.4953	0.803133	0.0912772	0.999941	Gm4724	2	175422300	175435807	protein_coding	predicted gene 4724 [Source:MGI Symbol;Acc:MGI:3782904]
ENSMUSG00000075571	1.98117	1.94466	2.33348	2.94038	0	0.988107	1.06942	0	0	0	1.69797	0.267356	2.52658	0.0913935	0.999941	Defb30	14	63034087	63049960	protein_coding	defensin beta 30 [Source:MGI Symbol;Acc:MGI:1920920]
ENSMUSG00000025204	1070.82	891.628	1025.56	863.491	677.864	542.471	1317.53	740.432	1348.56	986.374	845.306	1098.22	-0.37763	0.0915153	0.999941	Ndufb8	19	44548572	44555440	protein_coding	NADH:ubiquinone oxidoreductase subunit B8 [Source:MGI Symbol;Acc:MGI:1914514]
ENSMUSG00000039069	244.674	219.747	226.347	189.164	258.051	191.693	266.286	256.303	274.78	241.507	221.613	259.719	-0.228359	0.0915236	0.999941	Mtg2	2	180070588	180085902	protein_coding	mitochondrial ribosome associated GTPase 2 [Source:MGI Symbol;Acc:MGI:106565]
ENSMUSG00000029551	86.1808	79.7312	127.175	79.3902	74.1414	48.4172	115.498	89.2316	143.236	93.7718	82.5059	110.434	-0.423416	0.0916368	0.999941	Psmg3	5	139823592	139826885	protein_coding	proteasome (prosome, macropain) assembly chaperone 3 [Source:MGI Symbol;Acc:MGI:1913756]
ENSMUSG00000023990	193.164	132.237	149.343	161.721	148.283	152.168	182.871	146.188	213.393	216.737	156.153	189.797	-0.281968	0.0917025	0.999941	Tfeb	17	47737030	47792419	protein_coding	transcription factor EB [Source:MGI Symbol;Acc:MGI:103270]
ENSMUSG00000028233	621.096	612.569	611.371	674.327	765.486	737.128	435.255	711.954	528.123	569.708	670.329	561.26	0.255739	0.0917973	0.999941	Tgs1	4	3574875	3616619	protein_coding	trimethylguanosine synthase 1 [Source:MGI Symbol;Acc:MGI:2151797]
ENSMUSG00000027886	21.7928	27.2253	11.6674	15.682	15.406	11.8573	8.55538	9.49272	5.84638	17.6928	17.2718	10.3968	0.724715	0.0919179	0.999941	1700013F07Rik	3	108534150	108544723	protein_coding	RIKEN cDNA 1700013F07 gene [Source:MGI Symbol;Acc:MGI:1922754]
ENSMUSG00000036986	205.051	195.439	169.177	199.946	227.239	195.645	242.759	274.34	187.084	240.622	198.749	236.201	-0.24788	0.0920435	0.999941	Pml	9	58218076	58249786	protein_coding	promyelocytic leukemia [Source:MGI Symbol;Acc:MGI:104662]
ENSMUSG00000026355	160.475	199.328	268.35	163.681	160.8	149.204	167.899	116.76	158.827	137.119	183.64	145.151	0.33823	0.0920734	0.999941	Mcm6	1	128331590	128359664	protein_coding	minichromosome maintenance complex component 6 [Source:MGI Symbol;Acc:MGI:1298227]
ENSMUSG00000010080	135.71	133.209	98.0061	198.966	231.09	142.287	147.58	183.21	249.445	260.084	156.545	210.08	-0.423843	0.0922092	0.999941	Epn3	11	94489599	94499974	protein_coding	epsin 3 [Source:MGI Symbol;Acc:MGI:1919139]
ENSMUSG00000024758	19723.5	21751.1	24046.5	19464.3	18980.2	20558.6	19354.4	18518.4	18490.1	17949.3	20754	18578.1	0.15977	0.0923308	0.999941	Rtn3	19	7425901	7483289	protein_coding	reticulon 3 [Source:MGI Symbol;Acc:MGI:1339970]
ENSMUSG00000043085	8.91525	15.5573	5.83369	11.7615	10.5916	8.89296	22.4579	16.1376	8.76957	19.4621	10.2587	16.7068	-0.692668	0.092354	0.999941	Tmem82	4	141613376	141618633	protein_coding	transmembrane protein 82 [Source:MGI Symbol;Acc:MGI:2384869]
ENSMUSG00000020703	11.887	9.72332	4.66696	7.84101	1.92575	7.90486	12.8331	21.8333	8.76957	9.73104	7.32481	13.2917	-0.854618	0.092502	0.999941	5530401A14Rik	11	81860673	81894582	protein_coding	RIKEN cDNA 5530401A14 gene [Source:MGI Symbol;Acc:MGI:1918638]
ENSMUSG00000050071	517.085	572.704	437.527	423.414	316.786	251.967	933.606	285.731	667.461	494.514	419.914	595.328	-0.503154	0.0925121	0.999941	Bex1	X	136213972	136215513	protein_coding	brain expressed X-linked 1 [Source:MGI Symbol;Acc:MGI:1328321]
ENSMUSG00000057147	295.194	312.119	281.184	248.952	253.236	356.707	251.314	268.644	249.445	216.737	291.232	246.535	0.241115	0.0926719	0.999941	Dph6	2	114516416	114654964	protein_coding	diphthamine biosynthesis 6 [Source:MGI Symbol;Acc:MGI:1913882]
ENSMUSG00000030145	205.051	236.277	210.013	272.475	237.83	245.051	181.802	196.499	216.316	208.775	234.449	200.848	0.223171	0.0927613	0.999941	Zfp248	6	118427319	118455528	protein_coding	zinc finger protein 248 [Source:MGI Symbol;Acc:MGI:1919970]
ENSMUSG00000020953	649.823	622.292	801.55	606.698	577.725	563.221	629.89	534.44	499.865	512.207	636.885	544.1	0.226923	0.0927904	0.999941	Coch	12	51593341	51605771	protein_coding	cochlin [Source:MGI Symbol;Acc:MGI:1278313]
ENSMUSG00000033773	319.958	358.79	451.528	334.223	335.081	330.028	325.104	270.543	333.244	275.123	354.935	301.003	0.237231	0.0930889	0.999941	Rpap2	5	107597373	107661838	protein_coding	RNA polymerase II associated protein 2 [Source:MGI Symbol;Acc:MGI:2141142]
ENSMUSG00000024713	154.531	210.024	270.683	185.244	171.392	154.145	171.108	157.579	140.313	145.081	191.003	153.52	0.31368	0.0931325	0.999941	Pcsk5	19	17432832	17837632	protein_coding	proprotein convertase subtilisin/kexin type 5 [Source:MGI Symbol;Acc:MGI:97515]
ENSMUSG00000032841	210.994	265.447	220.514	217.588	296.566	328.051	233.134	342.687	306.935	397.203	256.527	319.99	-0.319622	0.0932929	0.999941	Prr5l	2	101714285	101883027	protein_coding	proline rich 5 like [Source:MGI Symbol;Acc:MGI:1919696]
ENSMUSG00000034152	1901.92	1927.16	2111.8	1780.89	1918.05	2008.82	1762.41	1841.59	1749.04	1701.16	1941.44	1763.55	0.138435	0.0933437	0.999941	Exoc3	13	74169488	74208732	protein_coding	exocyst complex component 3 [Source:MGI Symbol;Acc:MGI:2443972]
ENSMUSG00000055371	527.981	516.308	492.364	530.248	544.987	581.007	397.825	461.346	495.968	513.976	532.149	467.279	0.186753	0.0934806	0.999941	Stam2	2	52691664	52742281	protein_coding	signal transducing adaptor molecule (SH3 domain and ITAM motif) 2 [Source:MGI Symbol;Acc:MGI:1929100]
ENSMUSG00000055945	1158.98	1148.32	931.058	764.498	931.1	890.284	1092.95	1069.83	1148.81	1259.73	970.708	1142.83	-0.23559	0.0935972	0.999941	Prr18	17	8337459	8344113	protein_coding	proline rich 18 [Source:MGI Symbol;Acc:MGI:2443403]
ENSMUSG00000022721	553.736	462.83	514.532	609.638	585.428	499.982	572.141	589.498	693.77	616.594	537.691	618.001	-0.2008	0.0936067	0.999941	Trmt2a	16	18248679	18254772	protein_coding	TRM2 tRNA methyltransferase 2A [Source:MGI Symbol;Acc:MGI:96270]
ENSMUSG00000016194	246.655	269.336	264.85	449.878	407.296	515.792	332.59	449.955	614.844	517.514	358.968	478.726	-0.415258	0.0936326	0.999941	Hsd11b1	1	193221634	193264075	protein_coding	hydroxysteroid 11-beta dehydrogenase 1 [Source:MGI Symbol;Acc:MGI:103562]
ENSMUSG00000059108	1.98117	3.88933	25.6683	5.88076	1.92575	11.8573	0	2.84782	7.79517	0.88464	8.53376	2.88191	1.55024	0.0937366	0.999941	Ifitm6	7	141015699	141017924	protein_coding	interferon induced transmembrane protein 6 [Source:MGI Symbol;Acc:MGI:2686976]
ENSMUSG00000058290	24.7646	22.3636	18.6678	27.4435	34.6635	14.8216	33.1521	29.4274	37.0271	33.6163	23.7874	33.3057	-0.480629	0.0937979	0.999941	Espl1	15	102296266	102324357	protein_coding	extra spindle pole bodies 1, separase [Source:MGI Symbol;Acc:MGI:2146156]
ENSMUSG00000046792	301.137	280.032	266.016	334.223	203.167	187.74	479.101	230.673	331.295	320.24	262.053	340.327	-0.376196	0.0938085	0.999941	Zfp787	7	6131491	6155997	protein_coding	zinc finger protein 787 [Source:MGI Symbol;Acc:MGI:1914359]
ENSMUSG00000074457	1114.41	1048.17	1530.76	1106.56	968.652	841.867	1597.72	941.678	1734.43	1298.65	1101.74	1393.12	-0.33872	0.0938829	0.999941	S100a16	3	90537254	90543151	protein_coding	S100 calcium binding protein A16 [Source:MGI Symbol;Acc:MGI:1915110]
ENSMUSG00000027656	0.990583	1.94466	12.8341	3.9205	1.92575	9.88107	0	1.89854	3.89758	0.88464	5.24945	1.67019	1.6286	0.0939403	0.999941	Wisp2	2	163820861	163833146	protein_coding	WNT1 inducible signaling pathway protein 2 [Source:MGI Symbol;Acc:MGI:1328326]
ENSMUSG00000056124	3131.23	3175.64	3087.19	3073.68	3266.07	3504.82	2635.06	3265.5	2757.54	2837.93	3206.44	2874	0.157833	0.0939978	0.999941	B4galt6	18	20684599	20746404	protein_coding	UDP-Gal:betaGlcNAc beta 1,4-galactosyltransferase, polypeptide 6 [Source:MGI Symbol;Acc:MGI:1928380]
ENSMUSG00000005705	34.6704	27.2253	24.5015	10.7814	15.406	19.7621	16.0413	17.0869	15.5903	6.19248	22.0578	13.7278	0.690163	0.0940281	0.999941	Agrp	8	105566698	105637393	protein_coding	agouti related neuropeptide [Source:MGI Symbol;Acc:MGI:892013]
ENSMUSG00000030322	142.644	148.767	114.34	181.323	188.724	224.3	86.6232	146.188	143.236	139.773	166.683	128.955	0.369698	0.0941297	0.999941	Mbd4	6	115840697	115853371	protein_coding	methyl-CpG binding domain protein 4 [Source:MGI Symbol;Acc:MGI:1333850]
ENSMUSG00000049354	4295.17	4913.19	3966.91	4204.74	4152.88	4095.7	4069.15	3975.55	3571.16	3695.14	4271.43	3827.75	0.158375	0.0941544	0.999941	Dcaf7	11	106036872	106059324	protein_coding	DDB1 and CUL4 associated factor 7 [Source:MGI Symbol;Acc:MGI:1919083]
ENSMUSG00000026235	2766.7	3222.31	2584.33	2214.1	2494.81	2358.61	2287.49	2498.48	2008.23	2180.64	2606.81	2243.71	0.216424	0.0941638	0.999941	Epha4	1	77367185	77515088	protein_coding	Eph receptor A4 [Source:MGI Symbol;Acc:MGI:98277]
ENSMUSG00000029163	42.5951	29.17	51.3365	40.1852	27.9234	28.6551	49.1934	40.8187	50.6686	53.963	36.6442	48.6609	-0.416433	0.0941997	0.999941	Emilin1	5	30913402	30921277	protein_coding	elastin microfibril interfacer 1 [Source:MGI Symbol;Acc:MGI:1926189]
ENSMUSG00000052496	14.8588	31.1146	24.5015	34.3044	24.0719	31.6194	40.638	42.7172	33.1295	31.847	26.7451	37.083	-0.467797	0.0942736	0.999941	Pkdrej	15	85814670	85821734	protein_coding	polycystin (PKD) family receptor for egg jelly [Source:MGI Symbol;Acc:MGI:1338786]
ENSMUSG00000027377	18.8211	8.75099	4.66696	7.84101	12.5174	11.8573	5.34711	5.69563	6.82077	6.19248	10.7424	6.014	0.843005	0.0942755	0.999941	Mall	2	127704386	127729932	protein_coding	mal, T cell differentiation protein-like [Source:MGI Symbol;Acc:MGI:2385152]
ENSMUSG00000004661	113.917	88.4822	88.6722	80.3703	104.953	111.656	55.61	93.9779	61.387	94.6565	98.0085	76.4078	0.355226	0.0945204	0.999941	Arid3b	9	57790353	57836793	protein_coding	AT rich interactive domain 3B (BRIGHT-like) [Source:MGI Symbol;Acc:MGI:1930768]
ENSMUSG00000061068	0	0	0	0	0	0.988107	1.06942	0	3.89758	2.65392	0.164684	1.90523	-2.88392	0.0945426	0.999941	Mcpt4	14	56059629	56062313	protein_coding	mast cell protease 4 [Source:MGI Symbol;Acc:MGI:96940]
ENSMUSG00000078905	7.92467	14.585	3.50022	10.7814	14.4431	6.91675	1.06942	9.49272	5.84638	2.65392	9.69185	4.76561	1.02419	0.0945922	0.999941	Gm14393	2	175061549	175067781	protein_coding	predicted gene 14393 [Source:MGI Symbol;Acc:MGI:3649576]
ENSMUSG00000057948	13.8682	21.3913	31.5019	32.3442	50.0695	38.5362	21.3884	44.6158	75.0285	53.963	31.2852	48.7489	-0.642114	0.0946192	0.999941	Unc13d	11	116062095	116077961	protein_coding	unc-13 homolog D [Source:MGI Symbol;Acc:MGI:1917700]
ENSMUSG00000003546	499.254	379.209	371.023	396.951	388.039	344.849	455.574	430.97	455.043	502.476	396.554	461.016	-0.217316	0.0946446	0.999941	Klc4	17	46630624	46646022	protein_coding	kinesin light chain 4 [Source:MGI Symbol;Acc:MGI:1922014]
ENSMUSG00000073877	4.95292	2.917	2.33348	1.96025	0.962875	4.94053	14.9719	0	6.82077	8.8464	3.01118	7.65977	-1.33832	0.0947114	0.999941	Gm13306	4	42153436	42158839	protein_coding	predicted gene 13306 [Source:MGI Symbol;Acc:MGI:3713752]
ENSMUSG00000036940	1167.9	1139.57	1460.76	1173.21	1109.23	1296.4	1153.91	1008.13	1065.99	1079.26	1224.51	1076.82	0.185093	0.0949283	0.999941	Kdm1a	4	136550540	136602723	protein_coding	lysine (K)-specific demethylase 1A [Source:MGI Symbol;Acc:MGI:1196256]
ENSMUSG00000026869	887.563	872.182	1218.08	1022.27	942.655	922.892	823.455	841.055	904.24	828.023	977.606	849.193	0.202487	0.094996	0.999941	Psmd5	2	34849734	34874968	protein_coding	proteasome (prosome, macropain) 26S subunit, non-ATPase, 5 [Source:MGI Symbol;Acc:MGI:1914248]
ENSMUSG00000048481	505.198	441.439	409.525	408.713	309.083	262.836	610.64	359.774	593.407	433.474	389.466	499.324	-0.358078	0.0950637	0.999941	Mypop	7	18991245	19001766	protein_coding	Myb-related transcription factor, partner of profilin [Source:MGI Symbol;Acc:MGI:2446472]
ENSMUSG00000032754	132.738	104.04	106.173	124.476	136.728	112.644	122.984	125.304	164.673	166.312	119.467	144.818	-0.278281	0.0950725	0.999941	Slc8b1	5	120511168	120534024	protein_coding	solute carrier family 8 (sodium/lithium/calcium exchanger), member B1 [Source:MGI Symbol;Acc:MGI:2180781]
ENSMUSG00000023019	1120.35	952.885	924.057	1054.62	1053.39	867.558	1211.66	1016.67	1096.2	1215.5	995.475	1135	-0.188963	0.0951108	0.999941	Gpd1	15	99717515	99725005	protein_coding	glycerol-3-phosphate dehydrogenase 1 (soluble) [Source:MGI Symbol;Acc:MGI:95679]
ENSMUSG00000044647	1666.16	1991.34	1591.43	1770.11	1791.91	1756.85	1395.6	1911.83	1343.69	1414.54	1761.3	1516.42	0.216017	0.0951941	0.999941	Csrnp3	2	65845767	66031546	protein_coding	cysteine-serine-rich nuclear protein 3 [Source:MGI Symbol;Acc:MGI:1925021]
ENSMUSG00000031970	398.215	343.233	381.524	337.163	306.194	286.551	413.866	391.1	403.4	375.972	342.147	396.085	-0.211609	0.0952996	0.999941	Dbndd1	8	123504718	123515463	protein_coding	dysbindin (dystrobrevin binding protein 1) domain containing 1 [Source:MGI Symbol;Acc:MGI:1919435]
ENSMUSG00000076439	1157.99	1017.06	1169.07	970.325	1106.34	1169.92	1215.93	1108.75	1415.8	1248.23	1098.45	1247.18	-0.183397	0.095343	0.999941	Mog	17	37010743	37023398	protein_coding	myelin oligodendrocyte glycoprotein [Source:MGI Symbol;Acc:MGI:97435]
ENSMUSG00000038555	2225.84	1966.06	1828.28	1710.32	1592.6	1453.51	2445.77	1675.47	2453.53	2055.9	1796.1	2157.67	-0.2645	0.0953546	0.999941	Reep2	18	34840589	34847463	protein_coding	receptor accessory protein 2 [Source:MGI Symbol;Acc:MGI:2385070]
ENSMUSG00000094441	80.2373	93.3439	73.5045	82.3306	74.1414	115.609	49.1934	88.2823	51.643	76.079	86.5277	66.2994	0.381249	0.0953726	0.999941	Zfp955a	17	33241519	33255040	protein_coding	zinc finger protein 955A [Source:MGI Symbol;Acc:MGI:4834570]
ENSMUSG00000054409	154.531	175.02	119.007	132.317	164.652	120.549	112.289	132.898	97.4396	128.273	144.346	117.725	0.294523	0.0954199	0.999941	Tmem74	15	43864646	43870036	protein_coding	transmembrane protein 74 [Source:MGI Symbol;Acc:MGI:2443417]
ENSMUSG00000031601	1347.19	1476.97	1782.78	1630.93	1666.74	1833.93	1286.51	1407.77	1568.78	1388.88	1623.09	1412.99	0.199729	0.0955326	0.999941	Cnot7	8	40492540	40515847	protein_coding	CCR4-NOT transcription complex, subunit 7 [Source:MGI Symbol;Acc:MGI:1298230]
ENSMUSG00000015363	470.527	385.043	415.359	533.189	437.145	395.243	488.726	431.919	610.946	544.938	439.418	519.132	-0.240473	0.0956196	0.999941	Trabd	15	89075124	89087077	protein_coding	TraB domain containing [Source:MGI Symbol;Acc:MGI:1915226]
ENSMUSG00000078867	57.4538	49.5889	67.6709	49.0063	91.4731	82.0129	29.9438	50.3114	71.1309	38.9242	66.201	47.5776	0.475054	0.0957064	0.999941	Gm14418	2	177387124	177398320	protein_coding	predicted gene 14418 [Source:MGI Symbol;Acc:MGI:3702408]
ENSMUSG00000034724	996.527	1077.34	859.887	1325.13	1255.59	1411.02	745.387	1127.74	966.601	948.334	1154.25	947.014	0.285511	0.0957576	0.999941	Cnot6l	5	96070333	96164171	protein_coding	CCR4-NOT transcription complex, subunit 6-like [Source:MGI Symbol;Acc:MGI:2443154]
ENSMUSG00000026958	349.676	314.063	317.353	412.633	334.118	331.016	405.311	369.267	397.554	400.742	343.143	393.218	-0.195818	0.0957861	0.999941	Dpp7	2	25352276	25356359	protein_coding	dipeptidylpeptidase 7 [Source:MGI Symbol;Acc:MGI:1933213]
ENSMUSG00000046404	373.45	376.292	526.199	447.918	369.744	419.945	327.243	343.637	366.373	389.242	418.925	356.624	0.230317	0.0958239	0.999941	Yod1	1	130717327	130724358	protein_coding	YOD1 deubiquitinase [Source:MGI Symbol;Acc:MGI:2442596]
ENSMUSG00000017747	153.54	137.099	151.676	147.999	108.805	136.359	167.899	149.985	163.699	177.813	139.246	164.849	-0.245196	0.0959211	0.999941	Ghdc	11	100766032	100770957	protein_coding	GH3 domain containing [Source:MGI Symbol;Acc:MGI:1931556]
ENSMUSG00000050919	74.2938	54.4506	43.1693	50.9666	86.6588	107.704	31.0132	76.891	38.9758	45.1166	69.5404	47.9992	0.534204	0.0960203	0.999941	Zfp366	13	99184823	99250656	protein_coding	zinc finger protein 366 [Source:MGI Symbol;Acc:MGI:2178429]
ENSMUSG00000024935	1408.61	1433.22	1766.44	1271.22	1179.52	1338.88	1288.65	1161.91	1226.76	1154.46	1399.65	1207.95	0.212222	0.0962324	0.999941	Slc1a1	19	28835049	28913960	protein_coding	solute carrier family 1 (neuronal/epithelial high affinity glutamate transporter, system Xag), member 1 [Source:MGI Symbol;Acc:MGI:105083]
ENSMUSG00000026203	2075.27	1729.78	1726.77	1609.37	1575.26	1431.77	2103.55	1617.56	2187.52	2003.71	1691.37	1978.09	-0.225872	0.0963441	0.999941	Dnajb2	1	75236406	75245692	protein_coding	DnaJ heat shock protein family (Hsp40) member B2 [Source:MGI Symbol;Acc:MGI:1928739]
ENSMUSG00000072707	0.990583	0.972332	1.16674	0.980126	1.92575	1.97621	6.41653	3.79709	2.92319	1.76928	1.33529	3.72652	-1.46056	0.0966864	0.999941	Olfr31	14	14322828	14331791	protein_coding	olfactory receptor 31 [Source:MGI Symbol;Acc:MGI:109304]
ENSMUSG00000116138	341.751	305.312	283.518	284.237	231.09	213.431	458.782	237.318	382.938	317.586	276.556	349.156	-0.335416	0.0967695	0.999941	C030006K11Rik	15	76721465	76723845	protein_coding	RIKEN cDNA C030006K11 gene [Source:MGI Symbol;Acc:MGI:1925941]
ENSMUSG00000033342	827.137	852.735	873.887	778.22	800.149	738.116	658.764	817.323	719.104	682.058	811.707	719.312	0.173761	0.09677	0.999941	Plppr5	3	117574836	117689507	protein_coding	phospholipid phosphatase related 5 [Source:MGI Symbol;Acc:MGI:1923019]
ENSMUSG00000010047	158.493	163.352	149.343	153.88	102.065	112.644	196.774	151.884	165.647	172.505	139.963	171.702	-0.29463	0.09684	0.999941	Hyal2	9	107567945	107572779	protein_coding	hyaluronoglucosaminidase 2 [Source:MGI Symbol;Acc:MGI:1196334]
ENSMUSG00000033006	874.685	806.063	719.878	767.439	607.574	625.472	911.148	779.352	891.573	837.754	733.518	854.957	-0.220799	0.096881	0.999941	Sox10	15	79154908	79165240	protein_coding	SRY (sex determining region Y)-box 10 [Source:MGI Symbol;Acc:MGI:98358]
ENSMUSG00000078580	81.2278	79.7312	73.5045	65.6685	60.6611	73.1199	95.1786	98.7243	85.7469	75.1944	72.3188	88.711	-0.293209	0.09709	0.999941	E430018J23Rik	7	127389673	127393629	protein_coding	RIKEN cDNA E430018J23 gene [Source:MGI Symbol;Acc:MGI:2141981]
ENSMUSG00000049112	193.164	175.992	193.679	99.9729	103.991	111.656	129.4	118.659	96.4652	98.195	146.409	110.68	0.403181	0.0971503	0.999941	Oxtr	6	112473683	112489943	protein_coding	oxytocin receptor [Source:MGI Symbol;Acc:MGI:109147]
ENSMUSG00000039263	298.166	250.862	269.517	320.501	267.679	262.836	328.313	270.543	383.912	321.124	278.26	325.973	-0.227837	0.09717	0.999941	Npepl1	2	174110349	174123070	protein_coding	aminopeptidase-like 1 [Source:MGI Symbol;Acc:MGI:2448523]
ENSMUSG00000054555	71.322	62.2292	56.0035	46.0659	68.3641	69.1675	66.3042	96.8258	62.3614	92.0026	62.192	79.3735	-0.353862	0.0973855	0.999941	Adam12	7	133883199	134232146	protein_coding	a disintegrin and metallopeptidase domain 12 (meltrin alpha) [Source:MGI Symbol;Acc:MGI:105378]
ENSMUSG00000029201	524.019	493.945	557.701	512.606	537.284	604.721	417.075	479.382	530.072	465.321	538.379	472.962	0.186133	0.0974489	0.999941	Ugdh	5	65413221	65435949	protein_coding	UDP-glucose dehydrogenase [Source:MGI Symbol;Acc:MGI:1306785]
ENSMUSG00000004360	1489.84	1459.47	1592.6	1470.19	1711.99	1982.14	1113.27	1497.95	1381.69	1533.97	1617.7	1381.72	0.227133	0.097829	0.999941	9330159F19Rik	10	29211606	29230779	protein_coding	RIKEN cDNA 9330159F19 gene [Source:MGI Symbol;Acc:MGI:3036239]
ENSMUSG00000069248	0.990583	0	1.16674	6.86088	1.92575	3.95243	0	0	0.974396	0.88464	2.48273	0.464759	2.37495	0.0979584	0.999941	Serpinb6e	13	33832345	33843408	protein_coding	serine (or cysteine) peptidase inhibitor, clade B, member 6e [Source:MGI Symbol;Acc:MGI:2667778]
ENSMUSG00000021690	1031.2	1170.69	992.895	1122.24	1277.74	1249.96	846.982	1247.34	919.83	850.139	1140.79	966.074	0.239929	0.0980231	0.999941	Jmy	13	93430101	93499808	protein_coding	junction-mediating and regulatory protein [Source:MGI Symbol;Acc:MGI:1913096]
ENSMUSG00000025779	3.96233	8.75099	9.33391	6.86088	11.5545	10.8692	10.6942	16.1376	11.6928	16.8082	8.5553	13.8332	-0.700153	0.0980756	0.999941	Ly96	1	16688051	16709611	protein_coding	lymphocyte antigen 96 [Source:MGI Symbol;Acc:MGI:1341909]
ENSMUSG00000028651	182.267	119.597	165.677	138.198	145.394	143.276	214.954	121.507	217.29	192.852	149.068	186.651	-0.324355	0.0981644	0.999941	Ppie	4	123127115	123139951	protein_coding	peptidylprolyl isomerase E (cyclophilin E) [Source:MGI Symbol;Acc:MGI:1917118]
ENSMUSG00000026435	16.8399	16.5296	15.1676	13.7218	30.812	24.7027	18.1802	27.5289	34.1039	35.3856	19.6289	28.7996	-0.554304	0.0981751	0.999941	Slc45a3	1	131962967	131982969	protein_coding	solute carrier family 45, member 3 [Source:MGI Symbol;Acc:MGI:1922082]
ENSMUSG00000036570	390.29	342.261	409.525	282.276	229.164	201.574	526.156	274.34	515.456	331.74	309.182	411.923	-0.413965	0.0982843	0.999941	Fxyd1	7	31051678	31057199	protein_coding	FXYD domain-containing ion transport regulator 1 [Source:MGI Symbol;Acc:MGI:1889273]
ENSMUSG00000050234	31.6987	38.8933	43.1693	34.3044	29.8491	32.6075	48.124	42.7172	53.5918	38.0395	35.0871	45.6181	-0.379958	0.0982968	0.999941	Gja4	4	127311421	127314039	protein_coding	gap junction protein, alpha 4 [Source:MGI Symbol;Acc:MGI:95715]
ENSMUSG00000038115	127.785	102.095	114.34	72.5293	86.6588	79.0486	104.803	57.9056	75.0285	58.3862	97.0762	74.0309	0.394253	0.098506	0.999941	Ano2	6	125690419	126040126	protein_coding	anoctamin 2 [Source:MGI Symbol;Acc:MGI:2387214]
ENSMUSG00000025453	8.91525	10.6957	9.33391	7.84101	9.62875	17.7859	4.27769	10.442	0.974396	7.07712	10.7001	5.6928	0.900607	0.0985527	0.999941	Nnt	13	119335448	119408997	protein_coding	nicotinamide nucleotide transhydrogenase [Source:MGI Symbol;Acc:MGI:109279]
ENSMUSG00000032842	210.994	252.806	155.176	294.038	228.201	206.514	310.132	243.963	283.549	264.507	224.622	275.538	-0.292355	0.098588	0.999941	Abcc10	17	46303221	46328352	protein_coding	ATP-binding cassette, sub-family C (CFTR/MRP), member 10 [Source:MGI Symbol;Acc:MGI:2386976]
ENSMUSG00000049488	196.136	225.581	235.681	214.648	246.496	283.587	167.899	229.724	195.854	192.852	233.688	196.582	0.248294	0.0986119	0.999941	Tmem67	4	12039355	12090020	protein_coding	transmembrane protein 67 [Source:MGI Symbol;Acc:MGI:1923928]
ENSMUSG00000059208	2031.69	1561.57	1810.78	2116.09	2316.68	1975.23	1882.18	2226.99	2667.9	2513.26	1968.67	2322.58	-0.238585	0.0986226	0.999941	Hnrnpm	17	33646233	33686860	protein_coding	heterogeneous nuclear ribonucleoprotein M [Source:MGI Symbol;Acc:MGI:1926465]
ENSMUSG00000023886	263.495	250.862	421.193	173.482	199.315	167.978	192.496	173.717	189.033	186.659	246.054	185.476	0.40598	0.0986666	0.999941	Smoc2	17	14279506	14404790	protein_coding	SPARC related modular calcium binding 2 [Source:MGI Symbol;Acc:MGI:1929881]
ENSMUSG00000021693	1476.96	1473.08	1556.43	1612.31	1631.11	1848.75	1274.75	1555.86	1424.57	1412.77	1599.77	1416.99	0.174862	0.0987131	0.999941	Kif2a	13	106958996	107022126	protein_coding	kinesin family member 2A [Source:MGI Symbol;Acc:MGI:108390]
ENSMUSG00000042133	1266.96	1368.07	1244.91	1595.65	1641.7	1833.93	1017.02	1445.74	1199.48	1340.23	1491.87	1250.62	0.25437	0.0988598	0.999941	Ppig	2	69722545	69754012	protein_coding	peptidyl-prolyl isomerase G (cyclophilin G) [Source:MGI Symbol;Acc:MGI:2445173]
ENSMUSG00000085601	9.90583	10.6957	12.8341	10.7814	15.406	11.8573	9.6248	6.6449	1.94879	9.73104	11.9134	6.98738	0.768765	0.0989413	0.999941	Gm4969	7	19099046	19118368	protein_coding	predicted gene 4969 [Source:MGI Symbol;Acc:MGI:3647482]
ENSMUSG00000009076	173.352	147.794	144.676	117.615	106.879	95.8464	187.149	123.405	200.726	155.697	131.027	166.744	-0.34753	0.0989645	0.999941	Zmat5	11	4704678	4737669	protein_coding	zinc finger, matrin type 5 [Source:MGI Symbol;Acc:MGI:1914428]
ENSMUSG00000039879	841.005	841.067	812.05	761.558	732.748	980.202	682.291	764.164	757.106	711.251	828.105	728.703	0.184311	0.0990851	0.999941	Heca	10	17868612	17948067	protein_coding	hdc homolog, cell cycle regulator [Source:MGI Symbol;Acc:MGI:2685715]
ENSMUSG00000035873	59.435	45.6996	53.67	47.0461	40.4408	42.4886	33.1521	25.6303	47.7454	38.9242	48.13	36.363	0.401512	0.0992722	0.999941	Pawr	10	108332121	108414240	protein_coding	PRKC, apoptosis, WT1, regulator [Source:MGI Symbol;Acc:MGI:2149961]
ENSMUSG00000042642	461.612	418.103	382.69	363.627	337.969	302.361	503.698	406.288	420.939	452.051	377.727	445.744	-0.238535	0.0993031	0.999941	Flad1	3	89401004	89411870	protein_coding	flavin adenine dinucleotide synthetase 1 [Source:MGI Symbol;Acc:MGI:2443030]
ENSMUSG00000040620	732.041	821.621	624.205	791.942	775.114	759.854	635.237	761.316	579.766	636.941	750.796	653.315	0.20111	0.0993107	0.999941	Dhx33	11	70984091	71004437	protein_coding	DEAH (Asp-Glu-Ala-His) box polypeptide 33 [Source:MGI Symbol;Acc:MGI:2445102]
ENSMUSG00000032398	189.201	188.632	238.015	182.303	159.837	148.216	234.203	180.362	278.677	208.775	184.368	225.504	-0.2918	0.0993338	0.999941	Snapc5	9	64179274	64183132	protein_coding	small nuclear RNA activating complex, polypeptide 5 [Source:MGI Symbol;Acc:MGI:1914282]
ENSMUSG00000034949	1088.65	987.889	759.547	773.32	903.177	745.033	1115.41	1028.06	918.856	1059.8	876.269	1030.53	-0.233568	0.0993768	0.999941	Zfr2	10	81233155	81252123	protein_coding	zinc finger RNA binding protein 2 [Source:MGI Symbol;Acc:MGI:2143792]
ENSMUSG00000079286	11.887	0.972332	4.66696	11.7615	0.962875	13.8335	1.06942	4.74636	2.92319	2.65392	7.34736	2.84822	1.3589	0.0994451	0.999941	Gm11084	2	72971548	72986716	protein_coding	predicted gene 11084 [Source:MGI Symbol;Acc:MGI:3779315]
ENSMUSG00000038264	2475.47	2054.54	1577.43	2152.36	2387.93	2123.44	2348.45	2422.54	2561.69	2582.26	2128.53	2478.74	-0.219542	0.0995827	0.999941	Sema7a	9	57940112	57962865	protein_coding	sema domain, immunoglobulin domain (Ig), and GPI membrane anchor, (semaphorin) 7A [Source:MGI Symbol;Acc:MGI:1306826]
ENSMUSG00000043252	1030.21	1019.98	1208.74	1036.97	1286.4	1220.31	803.136	1082.17	962.703	1064.22	1133.77	978.058	0.212492	0.0995973	0.999941	Tmem64	4	15265831	15286753	protein_coding	transmembrane protein 64 [Source:MGI Symbol;Acc:MGI:2140359]
ENSMUSG00000031591	877.657	835.233	961.393	966.404	986.947	1151.14	837.358	857.193	876.957	815.638	963.13	846.786	0.185774	0.0996254	0.999941	Asah1	8	41340197	41374773	protein_coding	N-acylsphingosine amidohydrolase 1 [Source:MGI Symbol;Acc:MGI:1277124]
ENSMUSG00000049723	4.95292	0	0	3.9205	0.962875	1.97621	2.13884	9.49272	9.74396	1.76928	1.96875	5.7862	-1.54193	0.100041	0.999941	Mmp12	9	7344381	7369499	protein_coding	matrix metallopeptidase 12 [Source:MGI Symbol;Acc:MGI:97005]
ENSMUSG00000021831	840.015	782.727	753.713	834.087	937.84	1072.1	604.224	913.2	633.358	760.79	870.08	727.893	0.257192	0.100049	0.999941	Ero1l	14	45283087	45318771	protein_coding	ERO1-like (S. cerevisiae) [Source:MGI Symbol;Acc:MGI:1354385]
ENSMUSG00000028959	1256.06	1317.51	1274.08	1269.26	1121.75	1009.85	1498.26	1186.59	1471.34	1376.5	1208.08	1383.17	-0.195187	0.100061	0.999941	Fastk	5	24438440	24445287	protein_coding	Fas-activated serine/threonine kinase [Source:MGI Symbol;Acc:MGI:1913837]
ENSMUSG00000096553	0.990583	3.88933	0	3.9205	0.962875	7.90486	5.34711	10.442	5.84638	6.19248	2.94469	6.95699	-1.22562	0.100118	0.999941	Gm10097	10	5069192	5071975	protein_coding	predicted gene 10097 [Source:MGI Symbol;Acc:MGI:3642295]
ENSMUSG00000020649	34.6704	28.1976	42.0026	33.3243	27.9234	31.6194	17.1108	27.5289	19.4879	30.9624	32.9563	23.7725	0.457341	0.10038	0.999941	Rrm2	12	24708241	24714146	protein_coding	ribonucleotide reductase M2 [Source:MGI Symbol;Acc:MGI:98181]
ENSMUSG00000028331	51.5103	43.7549	37.3356	60.7678	37.5521	35.5718	58.8182	42.7172	77.9517	56.617	44.4155	59.026	-0.407503	0.100433	0.999941	Trmo	4	46376505	46389437	protein_coding	tRNA methyltransferase O [Source:MGI Symbol;Acc:MGI:1922003]
ENSMUSG00000047879	2027.72	2378.32	2725.5	2125.89	2045.15	2239.05	1886.46	1949.8	2182.65	1892.25	2256.94	1977.79	0.190211	0.100445	0.999941	Usp14	18	9995432	10045119	protein_coding	ubiquitin specific peptidase 14 [Source:MGI Symbol;Acc:MGI:1928898]
ENSMUSG00000004328	141.653	180.854	74.6713	178.383	135.765	165.014	183.941	89.2316	67.2333	69.8866	146.057	102.573	0.51451	0.100462	0.999941	Hif3a	7	17031507	17062427	protein_coding	hypoxia inducible factor 3, alpha subunit [Source:MGI Symbol;Acc:MGI:1859778]
ENSMUSG00000029335	289.25	408.379	490.03	203.866	261.902	189.717	304.785	218.333	203.649	170.736	307.191	224.376	0.453282	0.100522	0.999941	Bmp3	5	98854415	98884396	protein_coding	bone morphogenetic protein 3 [Source:MGI Symbol;Acc:MGI:88179]
ENSMUSG00000062901	1665.17	1798.81	1774.61	1810.29	2047.07	2277.59	1368.86	1904.24	1473.29	1740.09	1895.59	1621.62	0.225023	0.100709	0.999941	Klhl24	16	20097542	20129221	protein_coding	kelch-like 24 [Source:MGI Symbol;Acc:MGI:1923035]
ENSMUSG00000062345	0	0.972332	0	0	0	0.988107	0	4.74636	0.974396	2.65392	0.32674	2.09367	-2.54741	0.10076	0.999941	Serpinb2	1	107511423	107535478	protein_coding	serine (or cysteine) peptidase inhibitor, clade B, member 2 [Source:MGI Symbol;Acc:MGI:97609]
ENSMUSG00000045648	159.484	200.3	193.679	228.369	205.092	229.241	131.539	223.079	153.955	151.273	202.694	164.961	0.296314	0.100953	0.999941	Vwc2l	1	70725715	70885397	protein_coding	von Willebrand factor C domain-containing protein 2-like [Source:MGI Symbol;Acc:MGI:2444069]
ENSMUSG00000053368	13.8682	29.17	26.835	13.7218	15.406	13.8335	6.41653	11.3913	19.4879	8.8464	18.8057	11.5355	0.697693	0.100957	0.999941	Rxfp2	5	150018675	150082184	protein_coding	relaxin/insulin-like family peptide receptor 2 [Source:MGI Symbol;Acc:MGI:2153463]
ENSMUSG00000025894	447.744	469.636	576.369	526.328	553.653	604.721	376.437	431.919	534.944	460.897	529.742	451.049	0.231116	0.101028	0.999941	Aasdhppt	9	4294793	4309471	protein_coding	aminoadipate-semialdehyde dehydrogenase-phosphopantetheinyl transferase [Source:MGI Symbol;Acc:MGI:1914868]
ENSMUSG00000047412	570.576	546.451	655.707	666.486	666.31	671.913	519.739	545.831	555.406	600.671	629.574	555.412	0.180014	0.101029	0.999941	Zbtb44	9	31030644	31075885	protein_coding	zinc finger and BTB domain containing 44 [Source:MGI Symbol;Acc:MGI:1925123]
ENSMUSG00000039860	1188.7	843.984	770.048	821.346	1001.39	740.092	978.521	1151.47	1002.65	1127.92	894.26	1065.14	-0.252215	0.101084	0.999941	Srrm3	5	135806890	135874772	protein_coding	serine/arginine repetitive matrix 3 [Source:MGI Symbol;Acc:MGI:1920309]
ENSMUSG00000032593	46.5574	61.2569	49.003	150.939	104.953	89.9177	84.4844	175.615	111.081	118.542	83.7713	122.431	-0.546486	0.101125	0.999941	Amigo3	9	108053159	108055701	protein_coding	adhesion molecule with Ig like domain 3 [Source:MGI Symbol;Acc:MGI:2444854]
ENSMUSG00000044968	400.196	461.858	358.189	312.66	332.192	339.909	313.341	334.144	309.858	298.124	367.501	313.867	0.227875	0.101266	0.999941	Napepld	5	21662901	21701396	protein_coding	N-acyl phosphatidylethanolamine phospholipase D [Source:MGI Symbol;Acc:MGI:2140885]
ENSMUSG00000025607	1399.69	1502.25	1752.44	1497.63	1556.97	1725.23	1390.25	1469.47	1420.67	1338.46	1572.37	1404.71	0.162425	0.101404	0.999941	Copg2	6	30747554	30896794	protein_coding	coatomer protein complex, subunit gamma 2 [Source:MGI Symbol;Acc:MGI:1858683]
ENSMUSG00000090777	24.7646	10.6957	1.16674	6.86088	31.7749	14.8216	29.9438	47.4636	11.6928	27.4238	15.0141	29.131	-0.949518	0.101426	0.999941	Ccdc188	16	18217879	18220348	protein_coding	coiled-coil domain containing 188 [Source:MGI Symbol;Acc:MGI:3647803]
ENSMUSG00000058441	2170.37	1816.32	1491.09	1591.72	1683.11	1519.71	2128.15	1915.63	1835.76	2059.44	1712.05	1984.75	-0.213028	0.101601	0.999941	Panx2	15	89059734	89073567	protein_coding	pannexin 2 [Source:MGI Symbol;Acc:MGI:1890615]
ENSMUSG00000054708	750.862	641.739	493.531	578.274	729.859	632.388	703.68	707.208	722.028	870.486	637.776	750.85	-0.235189	0.101625	0.999941	Ankrd24	10	81628540	81647610	protein_coding	ankyrin repeat domain 24 [Source:MGI Symbol;Acc:MGI:1890394]
ENSMUSG00000021263	40.6139	39.8656	29.1685	65.6685	50.0695	61.2626	41.7075	41.768	24.3599	30.9624	47.7748	34.6994	0.467715	0.101641	0.999941	Degs2	12	108678711	108702315	protein_coding	delta(4)-desaturase, sphingolipid 2 [Source:MGI Symbol;Acc:MGI:1917309]
ENSMUSG00000090215	4.95292	0	0	0.980126	1.92575	0.988107	0	0	0	0	1.47448	0	3.05888	0.101644	0.999941	Trim34b	7	104329471	104336909	protein_coding	tripartite motif-containing 34B [Source:MGI Symbol;Acc:MGI:4821264]
ENSMUSG00000036073	447.744	360.735	642.873	440.077	300.417	518.756	444.88	284.782	362.475	325.548	451.767	354.421	0.349931	0.101649	0.999941	Galt	4	41755228	41758695	protein_coding	galactose-1-phosphate uridyl transferase [Source:MGI Symbol;Acc:MGI:95638]
ENSMUSG00000029544	2916.28	2237.34	2613.5	2145.5	2032.63	1572.08	3652.08	2170.04	2851.08	2541.57	2252.89	2803.69	-0.315506	0.101686	0.999941	Cabp1	5	115168689	115194381	protein_coding	calcium binding protein 1 [Source:MGI Symbol;Acc:MGI:1352750]
ENSMUSG00000110723	1.98117	1.94466	2.33348	1.96025	3.8515	6.91675	0	1.89854	0	1.76928	3.16463	0.916956	1.74279	0.101704	0.999941	Gm49353	10	29198954	29221940	protein_coding	predicted gene, 49353 [Source:MGI Symbol;Acc:MGI:6121556]
ENSMUSG00000030447	1638.42	1696.72	1752.44	1592.71	1608.96	1700.53	1498.26	1618.51	1385.59	1554.31	1664.96	1514.17	0.136631	0.101711	0.999941	Cyfip1	7	55841745	55932602	protein_coding	cytoplasmic FMR1 interacting protein 1 [Source:MGI Symbol;Acc:MGI:1338801]
ENSMUSG00000060427	286.279	317.953	364.023	290.117	286.937	339.909	302.646	232.572	287.447	257.43	314.203	270.024	0.2187	0.101739	0.999941	Zfp868	8	69610857	69625548	protein_coding	zinc finger protein 868 [Source:MGI Symbol;Acc:MGI:2142546]
ENSMUSG00000023191	435.857	383.099	289.351	554.751	482.4	427.85	452.366	548.679	566.124	523.707	428.885	522.719	-0.28475	0.101797	0.999941	P3h3	6	124841089	124857752	protein_coding	prolyl 3-hydroxylase 3 [Source:MGI Symbol;Acc:MGI:1315208]
ENSMUSG00000058355	1454.18	1620.88	1690.6	1519.2	1751.47	1860.61	1227.7	1603.32	1391.44	1544.58	1649.49	1441.76	0.193797	0.101872	0.999941	Abce1	8	79683462	79711740	protein_coding	ATP-binding cassette, sub-family E (OABP), member 1 [Source:MGI Symbol;Acc:MGI:1195458]
ENSMUSG00000020814	215.947	204.19	154.01	175.443	170.429	135.371	232.065	198.398	208.521	205.237	175.898	211.055	-0.261053	0.10193	0.999941	Mxra7	11	116803062	116828046	protein_coding	matrix-remodelling associated 7 [Source:MGI Symbol;Acc:MGI:1914872]
ENSMUSG00000039904	1283.8	1553.79	1271.75	1342.77	1555.04	1480.18	1500.4	1629.9	1600.93	1615.35	1414.55	1586.65	-0.165465	0.102135	0.999941	Gpr37	6	25665878	25690729	protein_coding	G protein-coupled receptor 37 [Source:MGI Symbol;Acc:MGI:1313297]
ENSMUSG00000039903	32.6893	33.0593	25.6683	37.2448	36.5893	28.6551	41.7075	36.0723	36.0527	57.5016	32.3177	42.8335	-0.406264	0.102143	0.999941	Eva1c	16	90826719	90905109	protein_coding	eva-1 homolog C (C. elegans) [Source:MGI Symbol;Acc:MGI:1918217]
ENSMUSG00000030701	7218.38	6164.58	7220.95	6489.42	6324.16	6247.8	7117.01	6870.83	7585.67	7735.29	6610.88	7327.2	-0.148524	0.102352	0.999941	Plekhb1	7	100642892	100662414	protein_coding	pleckstrin homology domain containing, family B (evectins) member 1 [Source:MGI Symbol;Acc:MGI:1351469]
ENSMUSG00000018830	70.3314	70.0079	30.3352	57.8274	80.8815	80.0367	69.5124	41.768	34.1039	41.5781	64.9034	46.7406	0.481792	0.102369	0.999941	Myh11	16	14194535	14291372	protein_coding	myosin, heavy polypeptide 11, smooth muscle [Source:MGI Symbol;Acc:MGI:102643]
ENSMUSG00000040740	121.842	132.237	128.341	148.979	125.174	79.0486	142.233	140.492	139.339	185.774	122.604	151.96	-0.311298	0.102378	0.999941	Slc25a34	4	141618824	141623821	protein_coding	solute carrier family 25, member 34 [Source:MGI Symbol;Acc:MGI:2686215]
ENSMUSG00000062077	0.990583	0	0	1.96025	0.962875	0	1.06942	0.949272	11.6928	0	0.652285	3.42786	-2.37095	0.102404	0.999941	Trim54	5	31116712	31137630	protein_coding	tripartite motif-containing 54 [Source:MGI Symbol;Acc:MGI:1889623]
ENSMUSG00000040025	689.446	632.016	745.546	625.32	529.581	524.685	568.933	498.368	556.38	526.361	624.432	537.51	0.215824	0.10259	0.999941	Ythdf2	4	132184912	132212303	protein_coding	YTH domain family 2 [Source:MGI Symbol;Acc:MGI:2444233]
ENSMUSG00000006411	82.2184	107.929	98.0061	162.701	119.397	125.49	149.719	135.746	142.262	149.504	115.957	144.308	-0.314017	0.10261	0.999941	Nectin4	1	171370099	171388598	protein_coding	nectin cell adhesion molecule 4 [Source:MGI Symbol;Acc:MGI:1918990]
ENSMUSG00000031209	187.22	189.605	161.01	260.714	189.686	268.765	176.455	200.296	137.39	162.774	209.5	169.229	0.309216	0.102629	0.999941	Heph	X	96455359	96574485	protein_coding	hephaestin [Source:MGI Symbol;Acc:MGI:1332240]
ENSMUSG00000025370	216.938	307.257	387.357	246.012	247.459	257.896	233.134	243.963	209.495	222.045	277.153	227.159	0.285317	0.102635	0.999941	Cdh9	15	16728756	16857094	protein_coding	cadherin 9 [Source:MGI Symbol;Acc:MGI:107433]
ENSMUSG00000027824	17.8305	25.2806	21.0013	70.5691	31.7749	29.6432	12.8331	29.4274	13.6415	24.7699	32.6833	20.168	0.69356	0.102758	0.999941	Vmn2r1	3	64081547	64109484	protein_coding	vomeronasal 2, receptor 1 [Source:MGI Symbol;Acc:MGI:3645892]
ENSMUSG00000021072	884.591	1033.59	1082.73	1204.58	910.88	1127.43	865.163	781.251	1000.7	948.334	1040.63	898.863	0.211074	0.102844	0.999941	Tmx1	12	70453095	70468040	protein_coding	thioredoxin-related transmembrane protein 1 [Source:MGI Symbol;Acc:MGI:1919986]
ENSMUSG00000029246	296.184	343.233	345.355	380.289	272.494	312.242	289.813	243.014	287.447	295.47	324.966	278.936	0.219997	0.102872	0.999941	Ppat	5	76913249	76951578	protein_coding	phosphoribosyl pyrophosphate amidotransferase [Source:MGI Symbol;Acc:MGI:2387203]
ENSMUSG00000025403	344.723	387.96	365.189	336.183	305.231	305.325	404.242	354.078	429.709	375.972	340.769	391	-0.198415	0.102974	0.999941	Shmt2	10	127517123	127522444	protein_coding	serine hydroxymethyltransferase 2 (mitochondrial) [Source:MGI Symbol;Acc:MGI:1277989]
ENSMUSG00000078942	12.8776	18.4743	10.5006	13.7218	15.406	19.7621	3.20827	15.1884	7.79517	10.6157	15.1237	9.20187	0.70643	0.102988	0.999941	Naip6	13	100281121	100317674	protein_coding	NLR family, apoptosis inhibitory protein 6 [Source:MGI Symbol;Acc:MGI:1298222]
ENSMUSG00000027425	588.407	556.174	583.369	484.182	519.953	516.78	502.628	459.448	479.403	487.437	541.477	482.229	0.166876	0.103002	0.999941	Kat14	2	144368983	144407676	protein_coding	lysine acetyltransferase 14 [Source:MGI Symbol;Acc:MGI:1917264]
ENSMUSG00000022309	164.437	151.684	168.01	153.88	186.798	214.419	93.0397	152.833	158.827	155.697	173.205	140.099	0.30341	0.103188	0.999941	Angpt1	15	42424723	42676977	protein_coding	angiopoietin 1 [Source:MGI Symbol;Acc:MGI:108448]
ENSMUSG00000061816	5.9435	4.86166	11.6674	30.3839	9.62875	15.8097	6.41653	7.59418	9.74396	3.53856	13.0492	6.82331	0.940812	0.103433	0.999941	Myl1	1	66924295	66945404	protein_coding	myosin, light polypeptide 1 [Source:MGI Symbol;Acc:MGI:97269]
ENSMUSG00000029346	125.804	132.237	145.842	136.238	93.3989	102.763	205.329	116.76	162.724	132.696	122.714	154.377	-0.330156	0.103494	0.999941	Srrd	5	112337392	112343040	protein_coding	SRR1 domain containing [Source:MGI Symbol;Acc:MGI:1917368]
ENSMUSG00000026380	155.522	193.494	120.174	106.834	102.065	86.9534	115.498	113.913	52.6174	92.0026	127.507	93.5076	0.448457	0.10381	0.999941	Tfcp2l1	1	118627945	118685168	protein_coding	transcription factor CP2-like 1 [Source:MGI Symbol;Acc:MGI:2444691]
ENSMUSG00000030089	107.974	123.486	126.008	211.707	172.355	189.717	166.83	207.891	249.445	173.389	155.208	199.389	-0.36056	0.103836	0.999941	Slc41a3	6	90604725	90646412	protein_coding	solute carrier family 41, member 3 [Source:MGI Symbol;Acc:MGI:1918949]
ENSMUSG00000025995	506.188	481.304	628.872	634.142	568.096	677.841	480.171	497.419	517.404	521.053	582.741	504.012	0.208771	0.103886	0.999941	Wdr75	1	45795166	45823619	protein_coding	WD repeat domain 75 [Source:MGI Symbol;Acc:MGI:1920924]
ENSMUSG00000030729	5709.72	6925.92	5918.87	4975.12	6179.73	5733.98	4517.24	6276.59	4362.37	5069.87	5907.22	5056.52	0.224287	0.103963	0.999941	Pgm2l1	7	100227394	100278868	protein_coding	phosphoglucomutase 2-like 1 [Source:MGI Symbol;Acc:MGI:1918224]
ENSMUSG00000028799	411.092	391.85	366.356	399.891	363.004	326.075	495.143	405.339	432.632	392.78	376.378	431.473	-0.195725	0.103964	0.999941	Zfp362	4	128773088	128806045	protein_coding	zinc finger protein 362 [Source:MGI Symbol;Acc:MGI:2652839]
ENSMUSG00000019256	161.465	223.636	169.177	203.866	213.758	227.265	127.261	187.956	173.443	173.389	199.861	165.512	0.27128	0.103996	0.999941	Ahr	12	35497974	35535038	protein_coding	aryl-hydrocarbon receptor [Source:MGI Symbol;Acc:MGI:105043]
ENSMUSG00000050908	299.156	316.98	249.682	219.548	342.784	257.896	217.093	292.376	181.238	228.237	281.008	229.736	0.290744	0.104083	0.999941	Tvp23a	16	10420557	10447362	protein_coding	trans-golgi network vesicle protein 23A [Source:MGI Symbol;Acc:MGI:3665441]
ENSMUSG00000040855	3582.94	4285.07	3528.22	3462.79	4067.18	3950.45	3101.32	3778.1	3212.58	3433.29	3812.77	3381.32	0.173232	0.104124	0.999941	Reps2	X	162411954	162643649	protein_coding	RALBP1 associated Eps domain containing protein 2 [Source:MGI Symbol;Acc:MGI:2663511]
ENSMUSG00000031138	3.96233	6.80632	8.16717	4.90063	7.703	1.97621	2.13884	2.84782	0	4.4232	5.58595	2.35247	1.22272	0.104175	0.999941	F9	X	59999464	60030759	protein_coding	coagulation factor IX [Source:MGI Symbol;Acc:MGI:88384]
ENSMUSG00000022897	1356.11	1485.72	1263.58	1378.06	1344.17	1291.46	1213.79	1395.43	1063.07	1121.72	1353.18	1198.5	0.175362	0.104217	0.999941	Dyrk1a	16	94570010	94695517	protein_coding	dual-specificity tyrosine-(Y)-phosphorylation regulated kinase 1a [Source:MGI Symbol;Acc:MGI:1330299]
ENSMUSG00000052852	2560.66	2684.61	2825.84	2229.79	2461.11	2571.05	2303.54	2482.35	2117.36	2241.68	2555.51	2286.23	0.160477	0.104259	0.999941	Reep1	6	71707561	71810710	protein_coding	receptor accessory protein 1 [Source:MGI Symbol;Acc:MGI:1098827]
ENSMUSG00000028405	614.162	568.814	600.871	579.255	601.797	643.258	548.614	521.15	526.174	575.016	601.359	542.739	0.147689	0.104389	0.999941	Aco1	4	40143081	40198338	protein_coding	aconitase 1 [Source:MGI Symbol;Acc:MGI:87879]
ENSMUSG00000020884	33.6798	24.3083	42.0026	65.6685	50.0695	36.56	49.1934	34.1738	91.5932	68.1173	42.0481	60.7694	-0.532031	0.104415	0.999941	Asgr1	11	70054085	70057894	protein_coding	asialoglycoprotein receptor 1 [Source:MGI Symbol;Acc:MGI:88081]
ENSMUSG00000042269	7.92467	7.77866	31.5019	11.7615	11.5545	9.88107	25.6661	25.6303	21.4367	14.1542	13.4004	21.7219	-0.711725	0.104482	0.999941	Fam92b	8	120166397	120177466	protein_coding	family with sequence similarity 92, member B [Source:MGI Symbol;Acc:MGI:3588213]
ENSMUSG00000038524	126.795	79.7312	64.1706	86.2511	84.733	65.2151	110.15	91.1301	110.107	119.426	84.4826	107.703	-0.348532	0.104632	0.999941	Fchsd1	18	37957431	37969774	protein_coding	FCH and double SH3 domains 1 [Source:MGI Symbol;Acc:MGI:2441771]
ENSMUSG00000046711	974.734	846.901	638.206	795.862	650.904	560.257	998.84	721.447	1005.58	910.295	744.477	909.04	-0.287743	0.104695	0.999941	Hmga1	17	27556497	27563674	protein_coding	high mobility group AT-hook 1 [Source:MGI Symbol;Acc:MGI:96160]
ENSMUSG00000045608	345.714	297.534	338.354	276.396	263.828	241.098	428.838	280.985	366.373	333.509	293.82	352.426	-0.262149	0.10476	0.999941	Dbx2	15	95623563	95655960	protein_coding	developing brain homeobox 2 [Source:MGI Symbol;Acc:MGI:107445]
ENSMUSG00000008090	335.808	334.482	326.687	287.177	360.115	275.682	356.118	336.992	352.731	439.666	319.992	371.377	-0.215749	0.104777	0.999941	Fgfrl1	5	108692382	108706924	protein_coding	fibroblast growth factor receptor-like 1 [Source:MGI Symbol;Acc:MGI:2150920]
ENSMUSG00000025145	1064.88	814.814	582.203	681.188	793.409	704.52	1046.96	813.526	973.422	910.295	773.502	936.052	-0.274577	0.1048	0.999941	Lrrc45	11	120713925	120721128	protein_coding	leucine rich repeat containing 45 [Source:MGI Symbol;Acc:MGI:2387183]
ENSMUSG00000026834	467.555	502.696	722.211	383.229	570.985	483.184	328.313	551.527	382.938	406.05	521.643	417.207	0.321109	0.104939	0.999941	Acvr1c	2	58267453	58357895	protein_coding	activin A receptor, type IC [Source:MGI Symbol;Acc:MGI:2661081]
ENSMUSG00000024580	361.563	375.32	400.191	399.891	345.672	380.421	270.564	339.839	348.834	357.395	377.177	329.158	0.194328	0.104971	0.999941	Grpel2	18	61712440	61726331	protein_coding	GrpE-like 2, mitochondrial [Source:MGI Symbol;Acc:MGI:1334416]
ENSMUSG00000031497	34.6704	53.4783	44.3361	57.8274	71.2528	59.2864	35.2909	40.8187	49.6942	36.2702	53.4752	40.5185	0.402605	0.104995	0.999941	Tnfsf13b	8	10006467	10039072	protein_coding	tumor necrosis factor (ligand) superfamily, member 13b [Source:MGI Symbol;Acc:MGI:1344376]
ENSMUSG00000041997	1515.59	1659.77	1402.42	1530.96	1554.08	1791.44	1480.08	1559.65	1141.02	1316.34	1575.71	1374.27	0.197627	0.105097	0.999941	Tlk1	2	70712407	70825728	protein_coding	tousled-like kinase 1 [Source:MGI Symbol;Acc:MGI:2441683]
ENSMUSG00000046637	54.4821	42.7826	39.6691	39.205	30.812	31.6194	73.7901	46.5143	50.6686	41.5781	39.7617	53.1378	-0.413173	0.105115	0.999941	Ttc34	4	154837459	154867127	protein_coding	tetratricopeptide repeat domain 34 [Source:MGI Symbol;Acc:MGI:2445205]
ENSMUSG00000031143	0	0	2.33348	0.980126	0.962875	0	1.06942	2.84782	3.89758	2.65392	0.712746	2.61719	-1.9411	0.105135	0.999941	Ccdc22	X	7593809	7605517	protein_coding	coiled-coil domain containing 22 [Source:MGI Symbol;Acc:MGI:1859608]
ENSMUSG00000026029	32.6893	46.6719	37.3356	49.0063	44.2923	30.6313	24.5967	33.2245	30.2063	32.7317	40.1045	30.1898	0.40711	0.105159	0.999941	Casp8	1	58795374	58847503	protein_coding	caspase 8 [Source:MGI Symbol;Acc:MGI:1261423]
ENSMUSG00000032405	1141.15	1388.49	1127.07	1294.75	1290.25	1357.66	1067.28	1304.3	1016.3	1058.03	1266.56	1111.48	0.188628	0.105244	0.999941	Pias1	9	62878368	62987924	protein_coding	protein inhibitor of activated STAT 1 [Source:MGI Symbol;Acc:MGI:1913125]
ENSMUSG00000063975	6.93408	2.917	4.66696	4.90063	4.81438	5.92864	4.27769	11.3913	12.6672	7.96176	5.02695	9.07447	-0.857762	0.10527	0.999941	Slco1a5	6	142234227	142322981	protein_coding	solute carrier organic anion transporter family, member 1a5 [Source:MGI Symbol;Acc:MGI:1351865]
ENSMUSG00000026211	524.019	462.83	261.35	381.269	407.296	289.515	555.03	459.448	437.504	487.437	387.713	484.855	-0.321496	0.105277	0.999941	Obsl1	1	75479310	75506452	protein_coding	obscurin-like 1 [Source:MGI Symbol;Acc:MGI:2138628]
ENSMUSG00000070803	150.569	157.518	93.3391	107.814	90.5103	45.4529	291.952	69.2969	161.75	132.696	107.534	163.924	-0.606432	0.105317	0.999941	Cited4	4	120666572	120667820	protein_coding	Cbp/p300-interacting transactivator, with Glu/Asp-rich carboxy-terminal domain, 4 [Source:MGI Symbol;Acc:MGI:1861694]
ENSMUSG00000048351	218.919	230.443	235.681	199.946	219.536	186.752	262.008	235.419	233.855	256.546	215.213	246.957	-0.199179	0.105372	0.999941	Coa7	4	108328140	108341544	protein_coding	cytochrome c oxidase assembly factor 7 [Source:MGI Symbol;Acc:MGI:1917143]
ENSMUSG00000051136	22.7834	20.419	7.00043	19.6025	11.5545	19.7621	6.41653	20.884	6.82077	4.4232	16.8537	9.63612	0.810492	0.105576	0.999941	Ghsr	3	27371351	27378010	protein_coding	growth hormone secretagogue receptor [Source:MGI Symbol;Acc:MGI:2441906]
ENSMUSG00000052581	315.006	352.957	376.857	282.276	233.979	246.039	258.8	209.789	298.165	217.621	301.185	246.094	0.29115	0.10561	0.999941	Lrrtm4	6	80018877	80810143	protein_coding	leucine rich repeat transmembrane neuronal 4 [Source:MGI Symbol;Acc:MGI:2389180]
ENSMUSG00000033554	103.021	139.043	157.51	120.556	114.582	120.549	149.719	149.036	166.622	136.235	125.877	150.403	-0.258875	0.105879	0.999941	Dph5	3	115887837	115934361	protein_coding	diphthamide biosynthesis 5 [Source:MGI Symbol;Acc:MGI:1916990]
ENSMUSG00000019689	314.015	189.605	294.018	198.966	129.988	162.05	374.298	161.376	351.757	292.816	214.774	295.062	-0.45865	0.105932	0.999941	Fmc1	6	38533502	38539449	protein_coding	formation of mitochondrial complex V assembly factor 1 [Source:MGI Symbol;Acc:MGI:1913367]
ENSMUSG00000028675	916.29	802.174	1110.74	970.325	848.293	1015.77	669.458	791.693	942.241	832.446	943.932	808.96	0.221815	0.106053	0.999941	Pnrc2	4	135870918	135873850	protein_coding	proline-rich nuclear receptor coactivator 2 [Source:MGI Symbol;Acc:MGI:106512]
ENSMUSG00000037366	96.0866	133.209	123.674	115.655	148.283	140.311	147.58	147.137	152.006	154.812	126.203	150.384	-0.252665	0.106076	0.999941	Pafah2	4	134396320	134427413	protein_coding	platelet-activating factor acetylhydrolase 2 [Source:MGI Symbol;Acc:MGI:2140321]
ENSMUSG00000032313	163.446	144.877	140.009	327.362	328.34	294.456	180.732	433.817	357.603	345.894	233.082	329.512	-0.499309	0.10608	0.999941	Tmem266	9	55326913	55438345	protein_coding	transmembrane protein 266 [Source:MGI Symbol;Acc:MGI:2142980]
ENSMUSG00000024485	2.97175	0.972332	3.50022	11.7615	9.62875	12.8454	14.9719	12.3405	14.6159	10.6157	6.94666	13.136	-0.909119	0.106118	0.999941	Slc4a9	18	36528157	36541293	protein_coding	solute carrier family 4, sodium bicarbonate cotransporter, member 9 [Source:MGI Symbol;Acc:MGI:2443384]
ENSMUSG00000035559	315.006	200.3	340.688	269.535	233.979	169.954	451.296	245.861	365.399	264.507	254.91	331.766	-0.380122	0.10633	0.999941	Mpv17l2	8	70758649	70760946	protein_coding	MPV17 mitochondrial membrane protein-like 2 [Source:MGI Symbol;Acc:MGI:2681846]
ENSMUSG00000047205	474.489	538.672	553.034	312.66	394.779	384.374	371.09	436.665	297.191	329.086	443.001	358.508	0.304823	0.106351	0.999941	Dusp18	11	3895240	3901296	protein_coding	dual specificity phosphatase 18 [Source:MGI Symbol;Acc:MGI:1922469]
ENSMUSG00000020099	581.472	547.423	442.194	738.035	938.803	742.068	544.336	1071.73	912.035	918.256	664.999	861.589	-0.373567	0.106371	0.999941	Unc5b	10	60762593	60831581	protein_coding	unc-5 netrin receptor B [Source:MGI Symbol;Acc:MGI:894703]
ENSMUSG00000031779	4.95292	9.72332	0	3.9205	4.81438	3.95243	0	1.89854	2.92319	1.76928	4.56059	1.64775	1.46249	0.10654	0.999941	Ccl22	8	94745590	94751699	protein_coding	chemokine (C-C motif) ligand 22 [Source:MGI Symbol;Acc:MGI:1306779]
ENSMUSG00000060981	7.92467	6.80632	15.1676	5.88076	17.3318	10.8692	29.9438	9.49272	22.4111	10.6157	10.6634	18.1158	-0.760562	0.106541	0.999941	Hist1h4h	13	23531050	23531519	protein_coding	histone cluster 1, H4h [Source:MGI Symbol;Acc:MGI:2448427]
ENSMUSG00000024511	739.966	867.32	737.379	750.777	778.003	804.319	607.432	785.048	647.973	714.789	779.627	688.811	0.178253	0.106576	0.999941	Rab27b	18	69979131	70141605	protein_coding	RAB27B, member RAS oncogene family [Source:MGI Symbol;Acc:MGI:1931295]
ENSMUSG00000026697	530.953	386.988	389.691	260.714	254.199	231.217	518.67	343.637	539.815	398.973	342.294	450.274	-0.395538	0.10682	0.999941	Myoc	1	162639155	162649693	protein_coding	myocilin [Source:MGI Symbol;Acc:MGI:1202864]
ENSMUSG00000041482	28.7269	20.419	29.1685	20.5826	119.397	28.6551	12.8331	34.1738	14.6159	30.0778	41.1581	22.9251	0.841952	0.106929	0.999941	Piezo2	18	63010213	63387183	protein_coding	piezo-type mechanosensitive ion channel component 2 [Source:MGI Symbol;Acc:MGI:1918781]
ENSMUSG00000038768	4.95292	0	1.16674	1.96025	0	2.96432	0	0.949272	0	0	1.8407	0.237318	2.65077	0.106972	0.999941	9130409I23Rik	1	181051237	181060667	protein_coding	RIKEN cDNA 9130409I23 gene [Source:MGI Symbol;Acc:MGI:3588271]
ENSMUSG00000050359	0	0.972332	16.3343	10.7814	1.92575	5.92864	1.06942	3.79709	0.974396	1.76928	5.99041	1.90255	1.63298	0.107023	0.999941	Sprr1a	3	92483952	92485895	protein_coding	small proline-rich protein 1A [Source:MGI Symbol;Acc:MGI:106660]
ENSMUSG00000009569	3170.86	3526.65	2886.51	2285.65	2944.47	2825	2660.72	2981.66	1779.25	2346.07	2939.86	2441.92	0.267768	0.107083	0.999941	Mkl2	16	13256481	13417529	protein_coding	MKL/myocardin-like 2 [Source:MGI Symbol;Acc:MGI:3050795]
ENSMUSG00000033208	2109.94	1884.38	2609.99	3036.43	2847.22	2967.29	2255.41	2805.1	4131.44	3667.72	2575.88	3214.92	-0.319816	0.10723	0.999941	S100b	10	76253853	76261159	protein_coding	S100 protein, beta polypeptide, neural [Source:MGI Symbol;Acc:MGI:98217]
ENSMUSG00000074884	659.729	388.933	568.202	453.798	488.178	337.933	618.126	451.854	777.568	590.94	482.795	609.622	-0.336728	0.107271	0.999941	Serf2	2	121449195	121458313	protein_coding	small EDRK-rich factor 2 [Source:MGI Symbol;Acc:MGI:1337041]
ENSMUSG00000078765	2.97175	0.972332	2.33348	1.96025	0.962875	1.97621	1.06942	6.6449	5.84638	4.4232	1.86282	4.49598	-1.29041	0.107304	0.999941	U2af1l4	7	30563301	30565365	protein_coding	U2 small nuclear RNA auxiliary factor 1-like 4 [Source:MGI Symbol;Acc:MGI:2678374]
ENSMUSG00000028005	3119.35	3360.38	3669.39	2909.01	2891.51	2878.36	2914.18	2582.02	2950.47	2686.65	3138	2783.33	0.172943	0.107384	0.999941	Gucy1b1	3	82032006	82074689	protein_coding	guanylate cyclase 1, soluble, beta 1 [Source:MGI Symbol;Acc:MGI:1860604]
ENSMUSG00000079109	239.721	288.783	249.682	296.978	292.714	288.527	268.425	251.557	201.7	230.891	276.068	238.143	0.215007	0.107462	0.999941	Pms2	5	143909964	143933968	protein_coding	PMS1 homolog2, mismatch repair system component [Source:MGI Symbol;Acc:MGI:104288]
ENSMUSG00000063060	27.7363	21.3913	18.6678	27.4435	28.8863	30.6313	12.8331	18.9854	25.3343	15.9235	25.7928	18.2691	0.499172	0.107699	0.999941	Sox7	14	63943673	63950732	protein_coding	SRY (sex determining region Y)-box 7 [Source:MGI Symbol;Acc:MGI:98369]
ENSMUSG00000024063	1053.98	981.083	935.725	950.722	850.219	1002.93	978.521	1064.13	1181.94	1086.34	962.443	1077.73	-0.163445	0.107764	0.999941	Lbh	17	72918305	72941947	protein_coding	limb-bud and heart [Source:MGI Symbol;Acc:MGI:1925139]
ENSMUSG00000023939	223.872	190.577	252.016	141.138	123.248	100.787	300.508	131.949	274.78	239.737	171.94	236.743	-0.462161	0.108014	0.999941	Mrpl14	17	45686322	45698495	protein_coding	mitochondrial ribosomal protein L14 [Source:MGI Symbol;Acc:MGI:1333864]
ENSMUSG00000041483	712.229	885.794	704.71	887.994	835.776	960.44	687.639	811.628	627.511	741.328	831.157	717.026	0.213257	0.108033	0.999941	Zfp281	1	136624901	136630053	protein_coding	zinc finger protein 281 [Source:MGI Symbol;Acc:MGI:3029290]
ENSMUSG00000001134	46.5574	38.8933	35.0022	42.1454	46.218	43.4767	52.4017	61.7027	49.6942	48.6552	42.0488	53.1134	-0.333513	0.108183	0.999941	Uxt	X	20941722	20962017	protein_coding	ubiquitously expressed prefoldin like chaperone [Source:MGI Symbol;Acc:MGI:1277988]
ENSMUSG00000043843	807.325	769.115	771.214	1417.26	1064.94	1129.41	962.48	1181.84	1507.39	1339.35	993.21	1247.76	-0.329127	0.108299	0.999941	Tmem145	7	25306106	25316195	protein_coding	transmembrane protein 145 [Source:MGI Symbol;Acc:MGI:3607779]
ENSMUSG00000020282	231.797	232.387	201.846	312.66	258.051	253.943	266.286	323.702	288.421	290.162	248.447	292.143	-0.2329	0.108311	0.999941	Rhbdf1	11	32209585	32222300	protein_coding	rhomboid 5 homolog 1 [Source:MGI Symbol;Acc:MGI:104328]
ENSMUSG00000035020	4.95292	3.88933	4.66696	2.94038	0	0.988107	0	0.949272	1.94879	0	2.90628	0.724516	1.99469	0.108451	0.999941	Epgn	5	91027464	91035215	protein_coding	epithelial mitogen [Source:MGI Symbol;Acc:MGI:1919170]
ENSMUSG00000030020	3003.45	3610.27	2710.33	2260.17	2854.92	2593.78	2516.35	2924.71	1847.46	2154.98	2838.82	2360.87	0.266038	0.108452	0.999941	Prickle2	6	92370908	92706155	protein_coding	prickle planar cell polarity protein 2 [Source:MGI Symbol;Acc:MGI:1925144]
ENSMUSG00000038250	552.746	586.316	561.201	561.612	584.465	650.174	595.668	505.013	433.606	513.091	582.752	511.845	0.188035	0.108511	0.999941	Usp38	8	80980733	81014928	protein_coding	ubiquitin specific peptidase 38 [Source:MGI Symbol;Acc:MGI:1922091]
ENSMUSG00000063236	283.307	188.632	253.182	231.31	172.355	165.014	312.271	195.55	324.474	253.007	215.633	271.326	-0.331549	0.108569	0.999941	1110038F14Rik	15	76948506	76950979	protein_coding	RIKEN cDNA 1110038F14 gene [Source:MGI Symbol;Acc:MGI:2152337]
ENSMUSG00000093904	5883.07	6876.33	6049.54	6293.39	5619.34	6111.44	6159.87	5357.69	5285.12	5306.96	6138.85	5527.41	0.151472	0.108677	0.999941	Tomm20	8	126930667	126945844	protein_coding	translocase of outer mitochondrial membrane 20 [Source:MGI Symbol;Acc:MGI:1915202]
ENSMUSG00000036304	608.218	599.929	630.039	428.315	522.841	456.505	511.184	463.245	427.76	437.897	540.975	460.021	0.233775	0.108795	0.999941	Zdhhc23	16	43965033	43979791	protein_coding	zinc finger, DHHC domain containing 23 [Source:MGI Symbol;Acc:MGI:2685625]
ENSMUSG00000074203	0.990583	0	1.16674	0	6.74013	4.94053	7.48596	5.69563	6.82077	4.4232	2.30633	6.10639	-1.38993	0.108832	0.999941	G430095P16Rik	8	84723007	84726844	protein_coding	RIKEN cDNA G430095P16 gene [Source:MGI Symbol;Acc:MGI:3588227]
ENSMUSG00000038569	54.4821	76.8142	58.3369	57.8274	77.9929	88.9296	53.4711	73.094	38.9758	46.0013	69.0639	52.8855	0.387058	0.108975	0.999941	Rad9b	5	122323223	122354233	protein_coding	RAD9 checkpoint clamp component B [Source:MGI Symbol;Acc:MGI:2385231]
ENSMUSG00000039154	471.518	463.802	368.689	461.639	404.408	390.302	499.42	416.73	537.867	513.976	426.726	491.998	-0.204573	0.108976	0.999941	Shd	17	55970467	55976625	protein_coding	src homology 2 domain-containing transforming protein D [Source:MGI Symbol;Acc:MGI:1099461]
ENSMUSG00000047534	19.8117	25.2806	18.6678	23.523	27.9234	52.3697	12.8331	29.4274	15.5903	15.0389	27.9294	18.2224	0.616068	0.109251	0.999941	Mis18bp1	12	65132734	65172604	protein_coding	MIS18 binding protein 1 [Source:MGI Symbol;Acc:MGI:2145099]
ENSMUSG00000006599	755.815	824.538	873.887	780.18	742.377	760.842	653.417	678.73	804.851	672.326	789.607	702.331	0.168439	0.109283	0.999941	Gtf2h1	7	46796103	46823800	protein_coding	general transcription factor II H, polypeptide 1 [Source:MGI Symbol;Acc:MGI:1277216]
ENSMUSG00000068587	4.95292	0.972332	10.5006	0	0	0.988107	1.06942	0	0.974396	0	2.90233	0.510955	2.54289	0.109375	0.999941	Mgam	6	40628831	40769123	protein_coding	maltase-glucoamylase [Source:MGI Symbol;Acc:MGI:1203495]
ENSMUSG00000074916	37.6422	29.17	28.0017	37.2448	40.4408	33.5956	43.8463	45.5651	38.9758	48.6552	34.3492	44.2606	-0.363628	0.109412	0.999941	Chst14	2	118926496	118928585	protein_coding	carbohydrate (N-acetylgalactosamine 4-0) sulfotransferase 14 [Source:MGI Symbol;Acc:MGI:1919386]
ENSMUSG00000047669	311.043	261.557	316.186	253.853	201.241	223.312	392.478	256.303	369.296	267.161	261.199	321.31	-0.298643	0.109445	0.999941	Msl3l2	10	56106917	56116880	protein_coding	MSL3 like 2 [Source:MGI Symbol;Acc:MGI:1920640]
ENSMUSG00000039682	938.082	893.573	1023.23	824.286	798.223	739.104	1018.09	858.142	1121.53	1012.03	869.416	1002.45	-0.205812	0.109455	0.999941	Lap3	5	45493374	45512691	protein_coding	leucine aminopeptidase 3 [Source:MGI Symbol;Acc:MGI:1914238]
ENSMUSG00000005553	10.8964	13.6126	10.5006	12.7416	6.74013	5.92864	7.48596	3.79709	6.82077	5.30784	10.07	5.85291	0.790633	0.109465	0.999941	Atp4a	7	30712209	30725534	protein_coding	ATPase, H+/K+ exchanging, gastric, alpha polypeptide [Source:MGI Symbol;Acc:MGI:88113]
ENSMUSG00000031351	42.5951	64.1739	66.5041	45.0858	51.0324	53.3578	56.6794	39.8694	40.9246	23.8853	53.7915	40.3397	0.421104	0.109505	0.999941	Zfp185	X	72987339	73031543	protein_coding	zinc finger protein 185 [Source:MGI Symbol;Acc:MGI:108095]
ENSMUSG00000036278	313.024	193.494	260.183	234.25	148.283	158.097	318.688	233.521	319.602	245.045	217.889	279.214	-0.357982	0.109566	0.999941	Macrod1	19	7056768	7198061	protein_coding	MACRO domain containing 1 [Source:MGI Symbol;Acc:MGI:2147583]
ENSMUSG00000063887	915.299	1129.85	1151.57	979.146	985.021	985.143	879.065	1048	780.491	873.14	1024.34	895.173	0.194066	0.109589	0.999941	Nlgn1	3	25426215	26332460	protein_coding	neuroligin 1 [Source:MGI Symbol;Acc:MGI:2179435]
ENSMUSG00000020594	3733.51	3971.98	3825.74	3873.46	4460.04	4835.8	2913.11	4205.28	3485.42	3632.33	4116.75	3559.03	0.209942	0.10961	0.999941	Pum2	12	8674134	8752581	protein_coding	pumilio RNA-binding family member 2 [Source:MGI Symbol;Acc:MGI:1931751]
ENSMUSG00000051354	37.6422	70.0079	60.6704	45.0858	23.109	37.5481	41.7075	15.1884	36.0527	30.9624	45.6772	30.9777	0.561491	0.109706	0.999941	Samd3	10	26229707	26272172	protein_coding	sterile alpha motif domain containing 3 [Source:MGI Symbol;Acc:MGI:2685469]
ENSMUSG00000049076	2080.23	2028.28	1786.28	2022.98	2372.52	2376.4	1523.93	2266.86	1639.91	1786.09	2111.11	1804.2	0.22662	0.109854	0.999941	Acap2	16	31092412	31201245	protein_coding	ArfGAP with coiled-coil, ankyrin repeat and PH domains 2 [Source:MGI Symbol;Acc:MGI:1925868]
ENSMUSG00000025001	55.4727	64.1739	66.5041	72.5293	83.7701	106.716	62.0265	69.2969	53.5918	47.7706	74.861	58.1714	0.366795	0.109896	0.999941	Hells	19	38930915	38971051	protein_coding	helicase, lymphoid specific [Source:MGI Symbol;Acc:MGI:106209]
ENSMUSG00000044986	541.849	452.134	550.701	434.196	389.002	272.718	609.571	383.506	683.052	560.862	440.1	559.248	-0.345944	0.109905	0.999941	Tst	15	78399556	78405907	protein_coding	thiosulfate sulfurtransferase, mitochondrial [Source:MGI Symbol;Acc:MGI:98852]
ENSMUSG00000004798	2202.07	2285.95	2231.97	1859.3	2370.6	2465.33	1720.7	2160.54	1940.02	2061.21	2235.87	1970.62	0.181966	0.109955	0.999941	Ulk2	11	61775649	61855073	protein_coding	unc-51 like kinase 2 [Source:MGI Symbol;Acc:MGI:1352758]
ENSMUSG00000015755	1248.14	1285.42	1335.92	1311.41	1404.83	1706.46	1111.13	1363.15	1153.69	1199.57	1382.03	1206.89	0.195374	0.109998	0.999941	Tab2	10	7905653	7956230	protein_coding	TGF-beta activated kinase 1/MAP3K7 binding protein 2 [Source:MGI Symbol;Acc:MGI:1915902]
ENSMUSG00000040759	915.299	741.889	1006.9	754.697	737.562	769.735	951.786	782.2	1193.64	956.296	821.013	970.979	-0.24247	0.110055	0.999941	Cmtm5	14	54936261	54939274	protein_coding	CKLF-like MARVEL transmembrane domain containing 5 [Source:MGI Symbol;Acc:MGI:2447164]
ENSMUSG00000038112	550.764	551.312	471.363	447.918	308.12	560.257	413.866	406.288	411.195	358.279	481.622	397.407	0.277544	0.110323	0.999941	AW551984	9	39587396	39604403	protein_coding	expressed sequence AW551984 [Source:MGI Symbol;Acc:MGI:2143322]
ENSMUSG00000028960	1909.84	1889.24	1886.62	1753.45	1971.01	2134.31	1699.31	1874.81	1545.39	1790.51	1924.08	1727.51	0.155378	0.110337	0.999941	Ube4b	4	149328416	149426749	protein_coding	ubiquitination factor E4B [Source:MGI Symbol;Acc:MGI:1927086]
ENSMUSG00000047606	216.938	246.972	192.512	209.747	220.498	255.92	209.607	212.637	164.673	178.697	223.765	191.403	0.227499	0.110422	0.999941	Ankrd34c	9	89725245	89738475	protein_coding	ankyrin repeat domain 34C [Source:MGI Symbol;Acc:MGI:2685617]
ENSMUSG00000015882	415.054	471.581	290.518	523.387	419.814	601.757	324.035	437.614	350.783	353.856	453.685	366.572	0.308099	0.110444	0.999941	Lcorl	5	45697181	45857615	protein_coding	ligand dependent nuclear receptor corepressor-like [Source:MGI Symbol;Acc:MGI:2651932]
ENSMUSG00000044201	4.95292	2.917	2.33348	11.7615	10.5916	2.96432	2.13884	0.949272	5.84638	0.88464	5.92014	2.45478	1.28936	0.110717	0.999941	Cdc25c	18	34732997	34751533	protein_coding	cell division cycle 25C [Source:MGI Symbol;Acc:MGI:88350]
ENSMUSG00000005148	187.22	213.913	183.178	148.979	124.211	133.394	192.496	104.42	109.132	106.157	165.149	128.051	0.369569	0.11074	0.999941	Klf5	14	99298691	99315036	protein_coding	Kruppel-like factor 5 [Source:MGI Symbol;Acc:MGI:1338056]
ENSMUSG00000020622	0.990583	0	0	2.94038	4.81438	1.97621	0	0.949272	0	0	1.78693	0.237318	2.61917	0.110809	0.999941	Nt5c1b	12	10369973	10390175	protein_coding	5'-nucleotidase, cytosolic IB [Source:MGI Symbol;Acc:MGI:1918131]
ENSMUSG00000029056	574.538	526.032	534.366	686.088	681.716	547.411	609.571	665.44	723.976	721.866	591.692	680.213	-0.20112	0.11093	0.999941	Pank4	4	154964123	154980938	protein_coding	pantothenate kinase 4 [Source:MGI Symbol;Acc:MGI:2387466]
ENSMUSG00000012396	0	0	2.33348	0.980126	1.92575	1.97621	7.48596	0	5.84638	2.65392	1.20259	3.99656	-1.73999	0.110945	0.999941	Nanog	6	122707489	122714633	protein_coding	Nanog homeobox [Source:MGI Symbol;Acc:MGI:1919200]
ENSMUSG00000049103	2.97175	0.972332	3.50022	9.80126	6.74013	11.8573	6.41653	14.2391	19.4879	7.07712	5.97383	11.8052	-0.97802	0.110969	0.999941	Ccr2	9	124101950	124113557	protein_coding	chemokine (C-C motif) receptor 2 [Source:MGI Symbol;Acc:MGI:106185]
ENSMUSG00000039286	400.196	324.759	383.857	382.249	390.927	437.731	264.147	387.303	318.628	352.087	386.62	330.541	0.22468	0.111086	0.999941	Fndc3b	3	27416162	27711307	protein_coding	fibronectin type III domain containing 3B [Source:MGI Symbol;Acc:MGI:1919257]
ENSMUSG00000089824	353.638	299.478	326.687	280.316	287.9	352.754	251.314	276.238	311.807	258.315	316.796	274.419	0.206604	0.111186	0.999941	Rbm12	2	156091958	156111978	protein_coding	RNA binding motif protein 12 [Source:MGI Symbol;Acc:MGI:1922960]
ENSMUSG00000044348	246.655	288.783	238.015	275.415	290.788	303.349	233.134	232.572	257.241	234.43	273.834	239.344	0.195534	0.111187	0.999941	Slc25a53	X	136981116	137038302	protein_coding	solute carrier family 25, member 53 [Source:MGI Symbol;Acc:MGI:1914312]
ENSMUSG00000027654	29.7175	31.1146	40.8359	42.1454	30.812	21.7384	31.0132	18.9854	22.4111	23.0006	32.7273	23.8526	0.458355	0.111206	0.999941	Fam83d	2	158768093	158786637	protein_coding	family with sequence similarity 83, member D [Source:MGI Symbol;Acc:MGI:1919128]
ENSMUSG00000024260	646.851	672.854	563.535	582.195	594.094	631.4	487.657	639.809	466.736	552.9	615.155	536.775	0.196348	0.111347	0.999941	Sap130	18	31634371	31723061	protein_coding	Sin3A associated protein [Source:MGI Symbol;Acc:MGI:1919782]
ENSMUSG00000078487	0.990583	0.972332	2.33348	0	1.92575	0.988107	0	0	0	0	1.20171	0	2.74431	0.11148	0.999941	Ankrd65	4	155790439	155799503	protein_coding	ankyrin repeat domain 65 [Source:MGI Symbol;Acc:MGI:2685285]
ENSMUSG00000031710	1.98117	0	0	0.980126	0.962875	0	0	2.84782	6.82077	1.76928	0.654028	2.85947	-2.11183	0.111544	0.999941	Ucp1	8	83290352	83298452	protein_coding	uncoupling protein 1 (mitochondrial, proton carrier) [Source:MGI Symbol;Acc:MGI:98894]
ENSMUSG00000063406	668.644	740.917	954.392	731.174	820.37	964.392	614.918	698.664	751.259	722.751	813.315	696.898	0.222106	0.111694	0.999941	Tmed5	5	108106366	108132620	protein_coding	transmembrane p24 trafficking protein 5 [Source:MGI Symbol;Acc:MGI:1921586]
ENSMUSG00000032318	0.990583	0	1.16674	0.980126	18.2946	1.97621	0	2.84782	0	0	3.90138	0.711954	2.44831	0.111762	0.999941	Isl2	9	55538672	55546180	protein_coding	insulin related protein 2 (islet 2) [Source:MGI Symbol;Acc:MGI:109156]
ENSMUSG00000040268	1768.19	1863.96	1932.12	2081.79	2114.47	2489.04	1548.52	1943.16	1813.35	1809.09	2041.6	1778.53	0.198893	0.111764	0.999941	Plekha1	7	130865756	130913312	protein_coding	pleckstrin homology domain containing, family A (phosphoinositide binding specific) member 1 [Source:MGI Symbol;Acc:MGI:2442213]
ENSMUSG00000024052	1712.72	1555.73	1561.1	1433.92	1626.3	1659.03	1350.68	1636.55	1240.41	1423.39	1591.47	1412.75	0.171708	0.111796	0.999941	Lpin2	17	71182560	71249817	protein_coding	lipin 2 [Source:MGI Symbol;Acc:MGI:1891341]
ENSMUSG00000032932	977.706	996.64	982.394	918.378	931.1	929.809	787.095	866.685	882.803	931.526	956.005	867.027	0.140082	0.112088	0.999941	Hspa13	16	75745431	75767104	protein_coding	heat shock protein 70 family, member 13 [Source:MGI Symbol;Acc:MGI:1309463]
ENSMUSG00000029546	26.7458	36.9486	15.1676	127.416	113.619	80.0367	32.0827	131.949	191.956	215.852	66.6557	142.96	-1.10034	0.112129	0.999941	Uncx	5	139543494	139548179	protein_coding	UNC homeobox [Source:MGI Symbol;Acc:MGI:108013]
ENSMUSG00000024974	1060.91	1041.37	1137.57	1238.88	1245	1351.73	903.662	1169.5	1004.6	1051.84	1179.24	1032.4	0.191587	0.112162	0.999941	Smc3	19	53600398	53645833	protein_coding	structural maintenance of chromosomes 3 [Source:MGI Symbol;Acc:MGI:1339795]
ENSMUSG00000027306	86.1808	81.6759	68.8376	71.5492	89.5474	90.9058	37.4298	74.0432	76.0029	68.1173	81.4494	63.8983	0.346855	0.112236	0.999941	Nusap1	2	119618298	119651244	protein_coding	nucleolar and spindle associated protein 1 [Source:MGI Symbol;Acc:MGI:2675669]
ENSMUSG00000026110	760.768	818.704	800.383	809.584	929.174	928.82	634.167	850.548	646.025	793.522	841.239	731.066	0.20204	0.112274	0.999941	Mgat4a	1	37439340	37541016	protein_coding	mannoside acetylglucosaminyltransferase 4, isoenzyme A [Source:MGI Symbol;Acc:MGI:2662992]
ENSMUSG00000023932	690.437	757.447	1041.9	691.969	814.592	892.261	629.89	702.461	749.311	701.52	814.767	695.795	0.22686	0.112437	0.999941	Cdc5l	17	45391884	45433737	protein_coding	cell division cycle 5-like (S. pombe) [Source:MGI Symbol;Acc:MGI:1918952]
ENSMUSG00000009075	1149.08	1094.85	1261.24	1199.67	1261.37	1198.57	1217	1220.76	1480.11	1421.62	1194.13	1334.87	-0.16118	0.112452	0.999941	Cabp7	11	4736892	4746778	protein_coding	calcium binding protein 7 [Source:MGI Symbol;Acc:MGI:2183437]
ENSMUSG00000054855	381.375	329.621	278.851	314.62	346.635	265.801	379.645	305.666	418.016	401.627	319.484	376.238	-0.23521	0.112594	0.999941	Rnd1	15	98663421	98677461	protein_coding	Rho family GTPase 1 [Source:MGI Symbol;Acc:MGI:2444878]
ENSMUSG00000014786	602.275	583.399	379.19	679.227	717.342	593.852	668.389	760.367	656.743	772.291	592.548	714.447	-0.269277	0.112959	0.999941	Slc9a5	8	105348843	105369881	protein_coding	solute carrier family 9 (sodium/hydrogen exchanger), member 5 [Source:MGI Symbol;Acc:MGI:2685542]
ENSMUSG00000044308	3151.05	4440.64	3219.03	3872.48	4156.73	4902.99	3181.53	3960.36	2968.99	3233.36	3957.15	3336.06	0.246373	0.113069	0.999941	Ubr3	2	69897246	70024013	protein_coding	ubiquitin protein ligase E3 component n-recognin 3 [Source:MGI Symbol;Acc:MGI:1861100]
ENSMUSG00000053070	127.785	160.435	177.344	146.039	167.54	140.311	110.15	138.594	127.646	139.773	153.242	129.041	0.244274	0.113082	0.999941	Cfap300	9	8021672	8042823	protein_coding	cilia and flagella associated protein 300 [Source:MGI Symbol;Acc:MGI:3045346]
ENSMUSG00000052155	936.101	1029.7	789.882	1048.73	1070.72	1275.65	699.402	1037.55	875.982	835.1	1025.13	862.01	0.250085	0.113092	0.999941	Acvr2a	2	48814109	48903269	protein_coding	activin receptor IIA [Source:MGI Symbol;Acc:MGI:102806]
ENSMUSG00000039481	117.879	46.6719	117.841	67.6287	65.4755	33.5956	146.511	68.3476	119.851	101.734	74.8486	109.111	-0.545174	0.113138	0.999941	Nrtn	17	56751325	56757530	protein_coding	neurturin [Source:MGI Symbol;Acc:MGI:108417]
ENSMUSG00000058173	33.6798	35.004	17.5011	18.6224	23.109	36.56	55.61	20.884	38.9758	43.3474	27.4127	39.7043	-0.527582	0.113213	0.999941	Smco4	9	15493432	15545260	protein_coding	single-pass membrane protein with coiled-coil domains 4 [Source:MGI Symbol;Acc:MGI:3039636]
ENSMUSG00000053129	5.9435	6.80632	4.66696	5.88076	7.703	3.95243	9.6248	9.49272	5.84638	15.0389	5.82549	10.0007	-0.781057	0.113232	0.999941	Gsx1	5	147188696	147190947	protein_coding	GS homeobox 1 [Source:MGI Symbol;Acc:MGI:95842]
ENSMUSG00000053560	160.475	217.802	203.013	139.178	149.246	120.549	432.047	93.9779	207.546	211.429	165.044	236.25	-0.516637	0.113256	0.999941	Ier2	8	84661331	84662852	protein_coding	immediate early response 2 [Source:MGI Symbol;Acc:MGI:104815]
ENSMUSG00000073680	1178.79	1385.57	1215.74	1424.12	1720.66	1674.84	1382.76	1843.49	1762.68	1758.66	1433.29	1686.9	-0.235031	0.11333	0.999941	Tmem88b	4	155781591	155785874	protein_coding	transmembrane protein 88B [Source:MGI Symbol;Acc:MGI:2444329]
ENSMUSG00000022324	529.962	562.98	702.377	451.838	438.108	332.004	566.794	348.383	345.911	304.316	502.878	391.351	0.36216	0.113352	0.999941	Matn2	15	34306677	34436273	protein_coding	matrilin 2 [Source:MGI Symbol;Acc:MGI:109613]
ENSMUSG00000063632	420.007	355.874	455.028	254.833	207.981	257.896	291.952	255.354	206.572	257.43	325.27	252.827	0.362788	0.113353	0.999941	Sox11	12	27334264	27342574	protein_coding	SRY (sex determining region Y)-box 11 [Source:MGI Symbol;Acc:MGI:98359]
ENSMUSG00000040432	2.97175	5.83399	2.33348	1.96025	0.962875	3.95243	13.9025	0.949272	4.87198	7.96176	3.00246	6.92138	-1.19231	0.113393	0.999941	Ltb4r2	14	55761428	55765138	protein_coding	leukotriene B4 receptor 2 [Source:MGI Symbol;Acc:MGI:1888501]
ENSMUSG00000047446	605.246	794.395	810.884	816.445	749.117	771.711	763.567	567.665	690.847	598.901	757.966	655.245	0.210649	0.113445	0.999941	Arl4a	12	40005447	40038025	protein_coding	ADP-ribosylation factor-like 4A [Source:MGI Symbol;Acc:MGI:99437]
ENSMUSG00000025544	2373.44	2453.19	2660.16	2472.86	2618.06	2595.76	2206.22	2269.71	2469.12	2330.14	2528.91	2318.8	0.124926	0.113829	0.999941	Tm9sf2	14	122107038	122159604	protein_coding	transmembrane 9 superfamily member 2 [Source:MGI Symbol;Acc:MGI:1915309]
ENSMUSG00000030101	444.772	508.53	493.531	478.302	427.517	404.136	433.116	384.455	413.144	396.319	459.464	406.758	0.175917	0.113868	0.999941	Sumf1	6	108107028	108185582	protein_coding	sulfatase modifying factor 1 [Source:MGI Symbol;Acc:MGI:1889844]
ENSMUSG00000002997	1107.47	1165.83	1320.75	1051.68	1206.48	1201.54	1138.93	999.584	1020.19	1059.8	1175.62	1054.63	0.156547	0.114037	0.999941	Prkar2b	12	31958476	32061296	protein_coding	protein kinase, cAMP dependent regulatory, type II beta [Source:MGI Symbol;Acc:MGI:97760]
ENSMUSG00000035215	298.166	277.115	427.026	266.594	175.243	200.586	493.004	222.13	471.608	296.354	274.122	370.774	-0.436139	0.114112	0.999941	Lsm7	10	80852821	80855209	protein_coding	LSM7 homolog, U6 small nuclear RNA and mRNA degradation associated [Source:MGI Symbol;Acc:MGI:1913344]
ENSMUSG00000079442	574.538	466.719	467.862	615.519	661.495	498.994	501.559	729.99	647.973	725.405	547.521	651.232	-0.250484	0.114113	0.999941	St6galnac4	2	32587095	32599698	protein_coding	ST6 (alpha-N-acetyl-neuraminyl-2,3-beta-galactosyl-1,3)-N-acetylgalactosaminide alpha-2,6-sialyltransferase 4 [Source:MGI Symbol;Acc:MGI:1341894]
ENSMUSG00000014856	350.667	255.723	347.688	319.521	259.976	250.979	345.423	262.948	445.299	394.549	297.426	362.055	-0.284579	0.114144	0.999941	Tmem208	8	105326354	105335219	protein_coding	transmembrane protein 208 [Source:MGI Symbol;Acc:MGI:1913570]
ENSMUSG00000054942	2530.94	2811.98	2939.02	2882.55	2842.41	3269.65	2194.45	2628.53	2747.8	2658.34	2879.42	2557.28	0.170959	0.114173	0.999941	Miga1	3	152273849	152340407	protein_coding	mitoguardin 1 [Source:MGI Symbol;Acc:MGI:1924567]
ENSMUSG00000006386	203.07	156.545	156.343	199.946	229.164	278.646	175.385	178.463	154.929	157.466	203.952	166.561	0.293825	0.114207	0.999941	Tek	4	94739289	94874976	protein_coding	TEK receptor tyrosine kinase [Source:MGI Symbol;Acc:MGI:98664]
ENSMUSG00000066441	526.99	490.055	607.871	545.93	561.356	560.257	461.99	471.788	544.687	473.282	548.743	487.937	0.168688	0.114227	0.999941	Rdh11	12	79174337	79192293	protein_coding	retinol dehydrogenase 11 [Source:MGI Symbol;Acc:MGI:102581]
ENSMUSG00000039391	27.7363	25.2806	23.3348	43.1256	34.6635	48.4172	35.2909	26.5796	11.6928	19.4621	33.7597	23.2563	0.546977	0.114295	0.999941	Ccdc81	7	89866148	89903629	protein_coding	coiled-coil domain containing 81 [Source:MGI Symbol;Acc:MGI:1918134]
ENSMUSG00000092349	3.96233	9.72332	8.16717	9.80126	1.92575	5.92864	21.3884	4.74636	11.6928	10.6157	6.58475	12.1108	-0.874346	0.114352	0.999941	Platr17	17	33905135	33906675	protein_coding	pluripotency associated transcript 17 [Source:MGI Symbol;Acc:MGI:3054967]
ENSMUSG00000074238	1479.93	1582.96	1542.43	1578	1582	1648.16	1473.66	1416.31	1463.54	1441.08	1568.91	1448.65	0.115253	0.114423	0.999941	Ap1ar	3	127807007	127837523	protein_coding	adaptor-related protein complex 1 associated regulatory protein [Source:MGI Symbol;Acc:MGI:2384822]
ENSMUSG00000049791	240.712	256.696	121.341	193.085	258.051	279.634	180.732	194.601	126.672	197.275	224.92	174.82	0.364674	0.114555	0.999941	Fzd4	7	89404355	89413134	protein_coding	frizzled class receptor 4 [Source:MGI Symbol;Acc:MGI:108520]
ENSMUSG00000056153	406.139	416.158	392.024	417.534	471.809	464.41	310.132	444.259	355.655	374.203	428.012	371.062	0.205436	0.114704	0.999941	Socs6	18	88665224	88927481	protein_coding	suppressor of cytokine signaling 6 [Source:MGI Symbol;Acc:MGI:1924885]
ENSMUSG00000055493	690.437	759.391	751.38	746.856	612.389	651.162	627.751	624.621	625.562	632.518	701.936	627.613	0.161042	0.114731	0.999941	Epm2a	10	11343404	11459644	protein_coding	epilepsy, progressive myoclonic epilepsy, type 2 gene alpha [Source:MGI Symbol;Acc:MGI:1341085]
ENSMUSG00000072872	462.602	550.34	326.687	455.759	492.992	489.113	349.701	464.194	305.96	414.896	462.915	383.688	0.271107	0.114876	0.999941	Rybp	6	100228565	100287485	protein_coding	RING1 and YY1 binding protein [Source:MGI Symbol;Acc:MGI:1929059]
ENSMUSG00000032423	1605.74	1833.82	1757.11	2023.96	1900.72	2227.19	1483.29	1802.67	1649.65	1710.01	1891.42	1661.4	0.186972	0.114898	0.999941	Syncrip	9	88447009	88482574	protein_coding	synaptotagmin binding, cytoplasmic RNA interacting protein [Source:MGI Symbol;Acc:MGI:1891690]
ENSMUSG00000020781	161.465	157.518	131.841	147.999	123.248	143.276	168.969	138.594	213.393	168.082	144.224	172.259	-0.255214	0.114912	0.999941	Tsen54	11	115814724	115823094	protein_coding	tRNA splicing endonuclease subunit 54 [Source:MGI Symbol;Acc:MGI:1923515]
ENSMUSG00000030677	77.2655	47.6443	67.6709	99.9729	160.8	115.609	57.7488	192.702	141.287	166.312	94.827	139.513	-0.557454	0.115062	0.999941	Kif22	7	127027729	127042471	protein_coding	kinesin family member 22 [Source:MGI Symbol;Acc:MGI:109233]
ENSMUSG00000062931	283.307	338.372	393.191	468.5	387.076	527.649	278.05	338.89	373.194	318.47	399.682	327.151	0.288566	0.115092	0.999941	Zfp938	10	82224850	82241280	protein_coding	zinc finger protein 938 [Source:MGI Symbol;Acc:MGI:3621440]
ENSMUSG00000030741	1091.62	980.111	1068.73	1072.26	1040.87	928.82	1178.5	1004.33	1217.02	1198.69	1030.4	1149.64	-0.158061	0.115112	0.999941	Spns1	7	126370060	126377450	protein_coding	spinster homolog 1 [Source:MGI Symbol;Acc:MGI:1920908]
ENSMUSG00000038540	3.96233	6.80632	3.50022	17.6423	17.3318	10.8692	9.6248	31.326	18.5135	12.385	10.0187	17.9623	-0.835493	0.11512	0.999941	Tmc3	7	83584927	83625614	protein_coding	transmembrane channel-like gene family 3 [Source:MGI Symbol;Acc:MGI:2669033]
ENSMUSG00000007877	35.661	29.17	18.6678	24.5032	26.9605	15.8097	62.0265	14.2391	41.899	34.501	25.1287	38.1664	-0.595384	0.115153	0.999941	Tcap	11	98383811	98384953	protein_coding	titin-cap [Source:MGI Symbol;Acc:MGI:1330233]
ENSMUSG00000033454	344.723	426.854	416.526	428.315	486.252	509.863	326.174	393.948	374.168	402.511	435.422	374.2	0.217995	0.115179	0.999941	Zbtb1	12	76370266	76396950	protein_coding	zinc finger and BTB domain containing 1 [Source:MGI Symbol;Acc:MGI:2442326]
ENSMUSG00000034164	83.209	45.6996	70.0043	57.8274	86.6588	51.3816	75.929	74.9925	85.7469	99.9643	65.7968	84.1582	-0.357384	0.115222	0.999941	Emid1	11	5106265	5152257	protein_coding	EMI domain containing 1 [Source:MGI Symbol;Acc:MGI:2155091]
ENSMUSG00000000440	36.6516	45.6996	75.838	61.7479	45.2551	59.2864	42.7769	41.768	37.0271	43.3474	54.0798	41.2298	0.386243	0.115691	0.999941	Pparg	6	115360951	115490399	protein_coding	peroxisome proliferator activated receptor gamma [Source:MGI Symbol;Acc:MGI:97747]
ENSMUSG00000001864	149.578	148.767	112.007	135.257	147.32	116.597	180.732	131	175.391	157.466	134.921	161.147	-0.252962	0.115867	0.999941	Aif1l	2	31950139	31973442	protein_coding	allograft inflammatory factor 1-like [Source:MGI Symbol;Acc:MGI:1919598]
ENSMUSG00000028031	18.8211	18.4743	10.5006	13.7218	12.5174	8.89296	6.41653	13.2898	5.84638	8.8464	13.8214	8.59978	0.681322	0.115892	0.999941	Dkk2	3	132085292	132180304	protein_coding	dickkopf WNT signaling pathway inhibitor 2 [Source:MGI Symbol;Acc:MGI:1890663]
ENSMUSG00000006179	14.8588	23.336	7.00043	9.80126	14.4431	9.88107	22.4579	17.0869	19.4879	21.2314	13.2201	20.066	-0.591721	0.115928	0.999941	Prss16	13	22002173	22009742	protein_coding	protease, serine 16 (thymus) [Source:MGI Symbol;Acc:MGI:1859181]
ENSMUSG00000024857	2.97175	0.972332	2.33348	0.980126	12.5174	7.90486	0	19.9347	9.74396	17.6928	4.61332	11.8429	-1.35987	0.115946	0.999941	Cabp2	19	4081578	4087340	protein_coding	calcium binding protein 2 [Source:MGI Symbol;Acc:MGI:1352749]
ENSMUSG00000073574	1.98117	3.88933	10.5006	0	3.8515	2.96432	1.06942	0.949272	0	2.65392	3.86449	1.16815	1.68288	0.116139	0.999941	Grxcr2	18	41986201	41999049	protein_coding	glutaredoxin, cysteine rich 2 [Source:MGI Symbol;Acc:MGI:2685697]
ENSMUSG00000013367	620.105	544.506	565.868	609.638	571.948	664.996	586.043	867.635	611.921	701.52	596.177	691.78	-0.214984	0.116195	0.999941	Iglon5	7	43472904	43490075	protein_coding	IgLON family member 5 [Source:MGI Symbol;Acc:MGI:2686277]
ENSMUSG00000026069	7.92467	0	12.8341	9.80126	4.81438	2.96432	3.20827	2.84782	1.94879	2.65392	6.38979	2.6647	1.25262	0.116238	0.999941	Il1rl1	1	40429570	40465415	protein_coding	interleukin 1 receptor-like 1 [Source:MGI Symbol;Acc:MGI:98427]
ENSMUSG00000055194	1.98117	0.972332	0	0	2.88863	3.95243	1.06942	5.69563	6.82077	4.4232	1.63243	4.50226	-1.45059	0.116596	0.999941	Actbl2	13	111255013	111257749	protein_coding	actin, beta-like 2 [Source:MGI Symbol;Acc:MGI:2444552]
ENSMUSG00000038859	23.774	22.3636	19.8346	27.4435	51.0324	37.5481	16.0413	31.326	8.76957	23.0006	30.3327	19.7844	0.615303	0.116626	0.999941	Baiap2l1	5	144264526	144358112	protein_coding	BAI1-associated protein 2-like 1 [Source:MGI Symbol;Acc:MGI:1914148]
ENSMUSG00000042942	179.296	213.913	134.175	188.184	224.35	225.288	151.858	193.652	135.441	157.466	194.201	159.604	0.284513	0.116669	0.999941	Greb1l	18	10325177	10562934	protein_coding	growth regulation by estrogen in breast cancer-like [Source:MGI Symbol;Acc:MGI:3576497]
ENSMUSG00000024283	1714.7	1841.6	1913.45	2077.87	1860.27	2242.01	1552.8	1911.83	1634.06	1771.93	1941.65	1717.66	0.176643	0.116932	0.999941	Wac	18	7868832	7973547	protein_coding	WW domain containing adaptor with coiled-coil [Source:MGI Symbol;Acc:MGI:2387357]
ENSMUSG00000022800	1572.06	1814.37	1793.28	1982.8	1801.54	2079.97	1405.22	1767.54	1662.32	1666.66	1840.67	1625.44	0.179189	0.116962	0.999941	Fyttd1	16	32877500	32908875	protein_coding	forty-two-three domain containing 1 [Source:MGI Symbol;Acc:MGI:1917955]
ENSMUSG00000020330	11.887	18.4743	12.8341	19.6025	10.5916	17.7859	3.20827	8.54345	11.6928	14.1542	15.1959	9.39968	0.677932	0.117094	0.999941	Hmmr	11	40701395	40733422	protein_coding	hyaluronan mediated motility receptor (RHAMM) [Source:MGI Symbol;Acc:MGI:104667]
ENSMUSG00000021900	155.522	147.794	176.178	151.92	144.431	148.216	189.288	155.681	211.444	163.658	154.01	180.018	-0.225431	0.117217	0.999941	Btd	14	31641028	31668579	protein_coding	biotinidase [Source:MGI Symbol;Acc:MGI:1347001]
ENSMUSG00000028917	2126.78	2142.05	1638.1	1873.02	1808.28	1588.88	2397.64	2077.96	1954.64	2106.33	1862.85	2134.14	-0.195854	0.117254	0.999941	Plekhm2	4	141625734	141664899	protein_coding	pleckstrin homology domain containing, family M (with RUN domain) member 2 [Source:MGI Symbol;Acc:MGI:1916832]
ENSMUSG00000044667	3172.84	3642.36	3569.05	2565.97	3024.39	2850.69	2816.86	2998.75	2403.84	2686.65	3137.55	2726.52	0.202492	0.117324	0.999941	Plppr4	3	117319139	117360876	protein_coding	phospholipid phosphatase related 4 [Source:MGI Symbol;Acc:MGI:106530]
ENSMUSG00000023883	849.921	1063.73	984.728	1024.23	1011.98	1123.48	870.51	943.576	869.161	922.68	1009.68	901.482	0.163428	0.117441	0.999941	Phf10	17	14945009	14961273	protein_coding	PHD finger protein 10 [Source:MGI Symbol;Acc:MGI:1919307]
ENSMUSG00000091455	10.8964	14.585	15.1676	15.682	15.406	21.7384	9.6248	15.1884	5.84638	9.73104	15.5792	10.0976	0.623504	0.117555	0.999941	Otogl	10	107760531	107912134	protein_coding	otogelin-like [Source:MGI Symbol;Acc:MGI:3647600]
ENSMUSG00000031478	48.5386	40.8379	29.1685	37.2448	39.4779	47.4291	38.4992	54.1085	74.0541	46.0013	40.4495	53.1658	-0.392122	0.117643	0.999941	Nek3	8	22128283	22166435	protein_coding	NIMA (never in mitosis gene a)-related expressed kinase 3 [Source:MGI Symbol;Acc:MGI:1344371]
ENSMUSG00000031066	2656.74	2715.72	2789.67	2528.73	2227.13	2459.4	2505.66	2315.27	2235.26	2153.21	2562.9	2302.35	0.15471	0.117657	0.999941	Usp11	X	20703906	20720539	protein_coding	ubiquitin specific peptidase 11 [Source:MGI Symbol;Acc:MGI:2384312]
ENSMUSG00000036537	102.03	104.04	93.3391	87.2312	61.624	74.108	133.678	88.2823	106.209	105.272	87.062	108.36	-0.314589	0.117718	0.999941	Rnf113a1	X	37191245	37192467	protein_coding	ring finger protein 113A1 [Source:MGI Symbol;Acc:MGI:1917192]
ENSMUSG00000041014	630.011	842.039	686.042	533.189	548.839	549.387	619.195	552.476	469.659	475.052	631.585	529.096	0.2558	0.117753	0.999941	Nrg3	14	38368952	39473088	protein_coding	neuregulin 3 [Source:MGI Symbol;Acc:MGI:1097165]
ENSMUSG00000047988	37.6422	25.2806	17.5011	31.364	45.2551	32.6075	31.0132	58.8549	44.8222	39.8088	31.6084	43.6248	-0.461211	0.117781	0.999941	4933428G20Rik	11	97490783	97500340	protein_coding	RIKEN cDNA 4933428G20 gene [Source:MGI Symbol;Acc:MGI:1918475]
ENSMUSG00000006456	381.375	333.51	325.52	312.66	412.111	333.98	365.742	475.585	345.911	444.974	349.859	408.053	-0.222392	0.117782	0.999941	Rbm14	19	4800569	4811634	protein_coding	RNA binding motif protein 14 [Source:MGI Symbol;Acc:MGI:1929092]
ENSMUSG00000032327	105.992	71.9526	122.508	96.0524	123.248	84.9772	74.8596	91.1301	68.2077	88.464	100.788	80.6654	0.317685	0.118068	0.999941	Stra6	9	58063788	58153996	protein_coding	stimulated by retinoic acid gene 6 [Source:MGI Symbol;Acc:MGI:107742]
ENSMUSG00000034761	871.713	897.462	852.886	954.643	978.281	1046.41	657.695	991.989	804.851	780.253	933.565	808.697	0.206916	0.118199	0.999941	Map4k5	12	69803750	69893200	protein_coding	mitogen-activated protein kinase kinase kinase kinase 5 [Source:MGI Symbol;Acc:MGI:1925503]
ENSMUSG00000031397	3.96233	3.88933	1.16674	4.90063	4.81438	1.97621	0	0	2.92319	1.76928	3.4516	1.17312	1.54273	0.118209	0.999941	Tktl1	X	74177259	74208500	protein_coding	transketolase-like 1 [Source:MGI Symbol;Acc:MGI:1933244]
ENSMUSG00000019907	1801.87	1849.38	1774.61	1852.44	1953.67	1970.29	1423.4	1889.05	1554.16	1786.09	1867.04	1663.18	0.166519	0.118219	0.999941	Ppp1r12a	10	108162193	108284475	protein_coding	protein phosphatase 1, regulatory subunit 12A [Source:MGI Symbol;Acc:MGI:1309528]
ENSMUSG00000079427	103.021	80.7036	98.0061	81.3505	73.1785	102.763	122.984	88.2823	129.595	99.0797	89.8371	109.985	-0.291322	0.118269	0.999941	Mthfsl	9	88688602	88720296	protein_coding	5, 10-methenyltetrahydrofolate synthetase-like [Source:MGI Symbol;Acc:MGI:3780550]
ENSMUSG00000039763	231.797	222.664	238.015	203.866	259.013	252.955	163.622	229.724	199.751	212.314	234.718	201.353	0.219107	0.118291	0.999941	Dnajc28	16	91614254	91619026	protein_coding	DnaJ heat shock protein family (Hsp40) member C28 [Source:MGI Symbol;Acc:MGI:2181053]
ENSMUSG00000024677	21.7928	19.4466	16.3343	14.7019	15.406	20.7502	21.3884	21.8333	26.3087	30.0778	18.072	24.902	-0.465528	0.118319	0.999941	Ms4a6b	19	11516512	11531256	protein_coding	membrane-spanning 4-domains, subfamily A, member 6B [Source:MGI Symbol;Acc:MGI:1917024]
ENSMUSG00000038801	5.9435	2.917	1.16674	0.980126	0.962875	0.988107	0	0.949272	0	0.88464	2.15972	0.458478	2.17483	0.118368	0.999941	Scgb1c1	7	140845547	140846769	protein_coding	secretoglobin, family 1C, member 1 [Source:MGI Symbol;Acc:MGI:2655401]
ENSMUSG00000033014	1219.41	1429.33	1083.9	1393.74	1469.35	1674.84	960.341	1402.07	1077.68	1223.46	1378.43	1165.89	0.241557	0.118498	0.999941	Trim33	3	103279293	103358775	protein_coding	tripartite motif-containing 33 [Source:MGI Symbol;Acc:MGI:2137357]
ENSMUSG00000079242	5.9435	5.83399	1.16674	16.6621	8.66588	10.8692	16.0413	10.442	18.5135	12.385	8.19024	14.3455	-0.792514	0.118511	0.999941	C730034F03Rik	15	89429589	89430868	protein_coding	RIKEN cDNA C730034F03 gene [Source:MGI Symbol;Acc:MGI:2441921]
ENSMUSG00000037236	7225.31	7985.76	9870.61	9288.66	8550.33	9733.84	7113.8	7297.05	8759.82	7558.36	8775.75	7682.26	0.191944	0.118676	0.999941	Matr3	18	35562146	35593835	protein_coding	matrin 3 [Source:MGI Symbol;Acc:MGI:1298379]
ENSMUSG00000050890	283.307	320.87	240.348	305.799	358.19	298.408	250.245	283.832	233.855	268.931	301.154	259.216	0.217283	0.118685	0.999941	Pdik1l	4	134275002	134287895	protein_coding	PDLIM1 interacting kinase 1 like [Source:MGI Symbol;Acc:MGI:2385213]
ENSMUSG00000009535	1163.94	1462.39	1367.42	1609.37	1507.86	1605.67	1178.5	1326.13	1292.05	1319.88	1452.77	1279.14	0.183569	0.118803	0.999941	Rnmt	18	68300355	68324852	protein_coding	RNA (guanine-7-) methyltransferase [Source:MGI Symbol;Acc:MGI:1915147]
ENSMUSG00000030095	705.295	713.692	702.377	652.764	559.43	574.09	615.987	512.607	580.74	579.439	651.275	572.193	0.186731	0.118805	0.999941	Tmem43	6	91473703	91488463	protein_coding	transmembrane protein 43 [Source:MGI Symbol;Acc:MGI:1921372]
ENSMUSG00000028576	325.902	351.012	567.035	349.905	338.932	415.005	289.813	322.753	358.578	321.124	391.298	323.067	0.274681	0.118823	0.999941	Ift74	4	94614491	94693229	protein_coding	intraflagellar transport 74 [Source:MGI Symbol;Acc:MGI:1914944]
ENSMUSG00000026399	90.1431	79.7312	113.174	77.43	138.654	107.704	64.1653	73.094	80.8749	99.9643	101.139	79.5246	0.343018	0.118855	0.999941	Cd55	1	130439027	130462744	protein_coding	CD55 molecule, decay accelerating factor for complement [Source:MGI Symbol;Acc:MGI:104850]
ENSMUSG00000024963	261.514	247.945	249.682	223.469	197.389	196.633	284.466	239.217	283.549	257.43	229.439	266.166	-0.214319	0.1191	0.999941	Dnajc4	19	6987911	6992503	protein_coding	DnaJ heat shock protein family (Hsp40) member C4 [Source:MGI Symbol;Acc:MGI:1927346]
ENSMUSG00000037003	381.375	342.261	254.349	469.48	431.368	393.267	349.701	348.383	264.061	286.623	378.683	312.192	0.280108	0.119114	0.999941	Tns2	15	102100413	102116401	protein_coding	tensin 2 [Source:MGI Symbol;Acc:MGI:2387586]
ENSMUSG00000075316	186.23	192.522	191.345	209.747	288.863	274.694	162.552	214.535	165.647	193.736	223.9	184.118	0.282084	0.119128	0.999941	Scn9a	2	66480080	66634962	protein_coding	sodium channel, voltage-gated, type IX, alpha [Source:MGI Symbol;Acc:MGI:107636]
ENSMUSG00000027420	14.8588	25.2806	17.5011	9.80126	6.74013	11.8573	11.7636	7.59418	7.79517	7.96176	14.3399	8.77869	0.711615	0.119324	0.999941	Bfsp1	2	143826528	143863173	protein_coding	beaded filament structural protein 1, in lens-CP94 [Source:MGI Symbol;Acc:MGI:101770]
ENSMUSG00000019878	532.934	554.229	607.871	617.479	692.307	831.986	428.838	543.933	562.227	614.825	639.468	537.456	0.250111	0.11935	0.999941	Hsf2	10	57486385	57513135	protein_coding	heat shock factor 2 [Source:MGI Symbol;Acc:MGI:96239]
ENSMUSG00000020377	24.7646	18.4743	38.5024	8.82114	14.4431	13.8335	43.8463	23.7318	28.2575	24.7699	19.8065	30.1514	-0.613113	0.119483	0.999941	Ltc4s	11	50236461	50238616	protein_coding	leukotriene C4 synthase [Source:MGI Symbol;Acc:MGI:107498]
ENSMUSG00000051495	827.137	779.81	669.708	675.307	675.938	536.542	787.095	740.432	796.082	897.025	694.074	805.158	-0.21429	0.119581	0.999941	Irf2bp2	8	126588296	126593986	protein_coding	interferon regulatory factor 2 binding protein 2 [Source:MGI Symbol;Acc:MGI:2443921]
ENSMUSG00000044328	124.814	112.791	172.677	120.556	102.065	89.9177	153.997	107.268	203.649	147.735	120.47	153.162	-0.348663	0.119581	0.999941	Trp53i13	11	77508099	77515980	protein_coding	transformation related protein 53 inducible protein 13 [Source:MGI Symbol;Acc:MGI:1915125]
ENSMUSG00000007122	12.8776	13.6126	24.5015	19.6025	26.9605	10.8692	28.8744	22.7825	23.3855	28.3085	18.0707	25.8377	-0.52005	0.119617	0.999941	Casq1	1	172209894	172219868	protein_coding	calsequestrin 1 [Source:MGI Symbol;Acc:MGI:1309468]
ENSMUSG00000003382	585.435	673.826	565.868	589.056	599.871	581.995	507.976	557.223	492.07	585.632	599.342	535.725	0.161495	0.119687	0.999941	Etv3	3	87525407	87540156	protein_coding	ets variant 3 [Source:MGI Symbol;Acc:MGI:1350926]
ENSMUSG00000003534	1496.77	1321.4	1100.23	1118.32	1145.82	792.462	1702.52	1217.92	1314.46	1389.77	1162.5	1406.17	-0.2743	0.119758	0.999941	Ddr1	17	35681567	35704621	protein_coding	discoidin domain receptor family, member 1 [Source:MGI Symbol;Acc:MGI:99216]
ENSMUSG00000059288	251.608	218.775	192.512	246.992	198.352	196.633	147.58	159.478	196.828	223.814	217.479	181.925	0.255972	0.119815	0.999941	Cdyl	13	35659833	35874063	protein_coding	chromodomain protein, Y chromosome-like [Source:MGI Symbol;Acc:MGI:1339956]
ENSMUSG00000067931	152.55	210.996	210.013	190.144	182.946	248.015	121.914	189.854	162.724	180.467	199.111	163.74	0.27965	0.119922	0.999941	Zfp948	17	21567008	21588699	protein_coding	zinc finger protein 948 [Source:MGI Symbol;Acc:MGI:3040683]
ENSMUSG00000019943	9837.48	11702	8766.88	8642.75	10380.8	9531.28	8821.66	9749.02	7518.44	8278.46	9810.19	8591.9	0.191342	0.120044	0.999941	Atp2b1	10	98914406	99026143	protein_coding	ATPase, Ca++ transporting, plasma membrane 1 [Source:MGI Symbol;Acc:MGI:104653]
ENSMUSG00000022054	4476.45	3667.64	3285.54	4742.83	5239	4633.23	4164.33	5519.07	5267.59	5580.31	4340.78	5132.82	-0.241775	0.120063	0.999941	Nefm	14	68082590	68124846	protein_coding	neurofilament, medium polypeptide [Source:MGI Symbol;Acc:MGI:97314]
ENSMUSG00000032030	1254.08	1304.87	1251.91	1446.67	1449.13	1578.01	1114.34	1384.04	1214.1	1175.69	1380.78	1222.04	0.176231	0.120074	0.999941	Cul5	9	53614582	53670014	protein_coding	cullin 5 [Source:MGI Symbol;Acc:MGI:1922967]
ENSMUSG00000038541	0	3.88933	2.33348	0	0.962875	0.988107	0	0	0	0	1.3623	0	2.93118	0.120155	0.999941	Srd5a2	17	74016955	74047916	protein_coding	steroid 5 alpha-reductase 2 [Source:MGI Symbol;Acc:MGI:2150380]
ENSMUSG00000058057	3.96233	2.917	1.16674	3.9205	5.77725	1.97621	1.06942	0.949272	1.94879	0.88464	3.28667	1.21303	1.45597	0.120498	0.999941	Mettl7a3	15	100334929	100340375	protein_coding	methyltransferase like 7A3 [Source:MGI Symbol;Acc:MGI:3710670]
ENSMUSG00000054360	33.6798	7.77866	22.168	2.94038	0.962875	6.91675	5.34711	1.89854	3.89758	9.73104	12.4078	5.21857	1.23897	0.120525	0.999941	Bsx	9	40874127	40880057	protein_coding	brain specific homeobox [Source:MGI Symbol;Acc:MGI:2669849]
ENSMUSG00000015839	400.196	305.312	429.36	291.097	329.303	325.087	262.008	261.05	301.088	345.01	346.726	292.289	0.244248	0.120633	0.999941	Nfe2l2	2	75675513	75704641	protein_coding	nuclear factor, erythroid derived 2, like 2 [Source:MGI Symbol;Acc:MGI:108420]
ENSMUSG00000014294	1131.25	705.913	988.228	583.175	438.108	373.504	1487.57	474.636	1212.15	875.794	703.362	1012.54	-0.525663	0.12064	0.999941	Ndufa2	18	36742332	36744557	protein_coding	NADH:ubiquinone oxidoreductase subunit A2 [Source:MGI Symbol;Acc:MGI:1343103]
ENSMUSG00000079941	224.862	169.186	199.512	138.198	87.6216	83.001	311.202	89.2316	302.063	179.582	150.397	220.52	-0.552079	0.121026	0.999941	Gm11273	13	21501029	21501418	protein_coding	predicted gene 11273 [Source:MGI Symbol;Acc:MGI:3649411]
ENSMUSG00000058624	3741.43	5008.48	4053.25	2973.7	3333.47	3137.24	3623.2	3044.32	2922.21	2875.96	3707.93	3116.42	0.250777	0.121129	0.999941	Gda	19	21391307	21473445	protein_coding	guanine deaminase [Source:MGI Symbol;Acc:MGI:95678]
ENSMUSG00000032579	249.627	273.225	233.348	262.674	252.273	245.051	302.646	278.137	273.805	283.085	252.7	284.418	-0.168941	0.12135	0.999941	Hemk1	9	107327084	107338350	protein_coding	HemK methyltransferase family member 1 [Source:MGI Symbol;Acc:MGI:1916786]
ENSMUSG00000070291	4.95292	8.75099	2.33348	6.86088	9.62875	7.90486	6.41653	2.84782	2.92319	1.76928	6.73865	3.4892	0.98681	0.121375	0.999941	Ddx43	9	78395777	78423587	protein_coding	DEAD (Asp-Glu-Ala-Asp) box polypeptide 43 [Source:MGI Symbol;Acc:MGI:3642857]
ENSMUSG00000027076	250.618	210.996	288.185	182.303	170.429	107.704	307.994	180.362	328.372	247.699	201.706	266.107	-0.400467	0.121702	0.999941	Timm10	2	84826997	84830213	protein_coding	translocase of inner mitochondrial membrane 10 [Source:MGI Symbol;Acc:MGI:1353429]
ENSMUSG00000048329	0	1.94466	5.83369	1.96025	0	0.988107	1.06942	0	0	0	1.78779	0.267356	2.58353	0.121736	0.999941	Mfsd6l	11	68556186	68558245	protein_coding	major facilitator superfamily domain containing 6-like [Source:MGI Symbol;Acc:MGI:2384904]
ENSMUSG00000078865	4.95292	4.86166	7.00043	6.86088	2.88863	7.90486	1.06942	6.6449	0.974396	1.76928	5.7449	2.6145	1.11905	0.121763	0.999941	Gm14406	2	177569204	177578210	protein_coding	predicted gene 14406 [Source:MGI Symbol;Acc:MGI:3649838]
ENSMUSG00000006235	106.983	116.68	115.507	114.675	84.733	65.2151	129.4	98.7243	149.083	124.734	100.632	125.485	-0.319145	0.121849	0.999941	Epor	9	21958897	21963506	protein_coding	erythropoietin receptor [Source:MGI Symbol;Acc:MGI:95408]
ENSMUSG00000036499	954.922	1280.56	961.393	1101.66	1361.51	1466.35	716.513	1337.52	765.875	1004.95	1187.73	956.216	0.312662	0.121865	0.999941	Eea1	10	95940650	96045518	protein_coding	early endosome antigen 1 [Source:MGI Symbol;Acc:MGI:2442192]
ENSMUSG00000028672	424.96	399.628	511.032	518.487	483.363	405.124	490.865	458.498	631.409	542.284	457.099	530.764	-0.216199	0.121896	0.999941	Hmgcl	4	135946448	135962617	protein_coding	3-hydroxy-3-methylglutaryl-Coenzyme A lyase [Source:MGI Symbol;Acc:MGI:96158]
ENSMUSG00000108976	10.8964	8.75099	14.0009	1.96025	6.74013	8.89296	10.6942	17.0869	11.6928	15.9235	8.54027	13.8493	-0.71452	0.121919	0.999941	Gm29797	2	181657034	181659467	protein_coding	predicted gene, 29797 [Source:MGI Symbol;Acc:MGI:5588956]
ENSMUSG00000054321	87.1713	107.929	73.5045	103.893	102.065	124.501	69.5124	112.014	74.0541	59.2709	99.8441	78.7129	0.345235	0.121998	0.999941	Taf4b	18	14783245	14900359	protein_coding	TATA-box binding protein associated factor 4b [Source:MGI Symbol;Acc:MGI:2152345]
ENSMUSG00000047371	201.088	185.715	193.679	176.423	167.54	115.609	227.787	173.717	220.214	214.083	173.342	208.95	-0.269806	0.122097	0.999941	Zfp768	7	127342795	127345589	protein_coding	zinc finger protein 768 [Source:MGI Symbol;Acc:MGI:2384582]
ENSMUSG00000097328	47.548	47.6443	59.5037	54.8871	49.1066	65.2151	62.0265	49.3621	87.6957	73.4251	53.9841	68.1274	-0.338177	0.122113	0.999941	Tnfsf12	11	69686250	69695849	protein_coding	tumor necrosis factor (ligand) superfamily, member 12 [Source:MGI Symbol;Acc:MGI:1196259]
ENSMUSG00000026348	0	0.972332	0	1.96025	4.81438	1.97621	1.06942	16.1376	1.94879	1.76928	1.62053	5.23128	-1.67485	0.122176	0.999941	Acmsd	1	127729413	127767978	protein_coding	amino carboxymuconate semialdehyde decarboxylase [Source:MGI Symbol;Acc:MGI:2386323]
ENSMUSG00000013878	516.094	640.767	613.705	722.353	689.419	839.891	504.767	552.476	598.279	630.748	670.371	571.568	0.229783	0.122294	0.999941	Rnf170	8	26119368	26151790	protein_coding	ring finger protein 170 [Source:MGI Symbol;Acc:MGI:1924983]
ENSMUSG00000036580	756.806	797.312	731.545	769.399	822.295	843.843	760.359	1010.03	880.854	881.986	786.867	883.306	-0.166992	0.1224	0.999941	Spg20	3	55112108	55137322	protein_coding	spastic paraplegia 20, spartin (Troyer syndrome) homolog (human) [Source:MGI Symbol;Acc:MGI:2139806]
ENSMUSG00000040356	1285.78	1252.36	1109.57	1108.52	1183.37	990.083	1553.87	1165.71	1299.84	1248.23	1154.95	1316.91	-0.188838	0.122403	0.999941	Skiv2l	17	34839228	34850210	protein_coding	superkiller viralicidic activity 2-like (S. cerevisiae) [Source:MGI Symbol;Acc:MGI:1099835]
ENSMUSG00000023852	454.678	482.277	367.523	567.493	603.723	671.913	344.354	614.179	315.704	381.28	524.601	413.879	0.34215	0.122507	0.999941	Chd1	17	15704967	15772610	protein_coding	chromodomain helicase DNA binding protein 1 [Source:MGI Symbol;Acc:MGI:88393]
ENSMUSG00000046798	901.431	854.68	949.725	1035.01	996.576	1184.74	811.691	906.555	799.979	945.68	987.028	865.976	0.188467	0.122528	0.999941	Cldn12	5	5489537	5514958	protein_coding	claudin 12 [Source:MGI Symbol;Acc:MGI:1929288]
ENSMUSG00000018378	654.776	586.316	508.698	585.135	543.062	473.303	650.209	571.462	686.949	640.479	558.548	637.275	-0.189715	0.122529	0.999941	Cuedc1	11	88098058	88194140	protein_coding	CUE domain containing 1 [Source:MGI Symbol;Acc:MGI:2144281]
ENSMUSG00000110324	0.990583	1.94466	0	4.90063	4.81438	3.95243	2.13884	0	0	0.88464	2.76711	0.755871	1.92504	0.122668	0.999941	Gm40460	7	142240344	142241078	protein_coding	predicted gene, 40460 [Source:MGI Symbol;Acc:MGI:5623345]
ENSMUSG00000064057	3.96233	3.88933	7.00043	2.94038	2.88863	3.95243	0	0.949272	2.92319	2.65392	4.10559	1.6316	1.2871	0.122749	0.999941	Scgb3a1	11	49663610	49665118	protein_coding	secretoglobin, family 3A, member 1 [Source:MGI Symbol;Acc:MGI:1915912]
ENSMUSG00000026874	7.92467	11.668	11.6674	5.88076	5.77725	6.91675	3.20827	6.6449	1.94879	6.19248	8.3058	4.49861	0.863254	0.122837	0.999941	Hc	2	34983331	35061438	protein_coding	hemolytic complement [Source:MGI Symbol;Acc:MGI:96031]
ENSMUSG00000056008	0	0	0	0	1.92575	0.988107	3.20827	3.79709	0	2.65392	0.485643	2.41482	-2.26736	0.122846	0.999941	Gm11541	11	94694498	94704499	protein_coding	predicted gene 11541 [Source:MGI Symbol;Acc:MGI:3650066]
ENSMUSG00000002083	117.879	85.5652	106.173	78.4101	49.1066	62.2507	167.899	60.7534	127.646	103.503	83.2309	114.95	-0.465488	0.122994	0.999941	Bbc3	7	16308393	16318205	protein_coding	BCL2 binding component 3 [Source:MGI Symbol;Acc:MGI:2181667]
ENSMUSG00000028923	538.877	511.447	521.532	443.997	398.63	360.659	620.265	426.223	595.356	559.093	462.524	550.234	-0.250593	0.123021	0.999941	Necap2	4	141066512	141078357	protein_coding	NECAP endocytosis associated 2 [Source:MGI Symbol;Acc:MGI:1913397]
ENSMUSG00000063765	379.393	337.399	271.85	182.303	155.986	157.109	501.559	257.253	302.063	290.162	247.34	337.759	-0.449032	0.123082	0.999941	Chadl	15	81678296	81697287	protein_coding	chondroadherin-like [Source:MGI Symbol;Acc:MGI:3036284]
ENSMUSG00000038602	1429.41	1476	1428.09	1153.61	1303.73	1372.48	1226.63	1304.3	1112.76	1222.57	1360.55	1216.57	0.161207	0.123226	0.999941	Slc35f1	10	52690533	53111622	protein_coding	solute carrier family 35, member F1 [Source:MGI Symbol;Acc:MGI:2139810]
ENSMUSG00000042115	455.668	485.194	599.704	467.52	437.145	362.635	592.46	444.259	627.511	553.785	467.978	554.504	-0.245385	0.123261	0.999941	Klhdc8a	1	132298626	132307357	protein_coding	kelch domain containing 8A [Source:MGI Symbol;Acc:MGI:2442630]
ENSMUSG00000024799	341.751	280.032	332.521	323.442	324.489	227.265	360.395	296.173	424.837	360.933	304.916	360.585	-0.24219	0.123347	0.999941	Tm7sf2	19	6062821	6077197	protein_coding	transmembrane 7 superfamily member 2 [Source:MGI Symbol;Acc:MGI:1920416]
ENSMUSG00000038522	12.8776	10.6957	8.16717	7.84101	3.8515	15.8097	14.9719	17.0869	21.4367	9.73104	9.87377	15.8066	-0.674461	0.123567	0.999941	Mfsd4b1	10	40001575	40025268	protein_coding	major facilitator superfamily domain containing 4B1 [Source:MGI Symbol;Acc:MGI:2143575]
ENSMUSG00000053137	762.749	538.672	630.039	538.089	735.637	566.185	664.111	692.969	796.082	774.945	628.562	732.027	-0.220109	0.123595	0.999941	Mapk11	15	89142486	89149628	protein_coding	mitogen-activated protein kinase 11 [Source:MGI Symbol;Acc:MGI:1338024]
ENSMUSG00000022783	99.0583	107.929	117.841	89.1915	63.5498	94.8583	80.2067	90.1809	67.2333	69.0019	95.4046	76.6557	0.313945	0.123682	0.999941	Spag6l	16	16753016	16829456	protein_coding	sperm associated antigen 6-like [Source:MGI Symbol;Acc:MGI:1354388]
ENSMUSG00000033676	4053.47	4985.15	4400.94	4045.96	4257.83	4122.38	3992.15	4311.59	3456.18	3627.91	4310.95	3846.96	0.164321	0.123692	0.999941	Gabrb3	7	57419692	57828802	protein_coding	gamma-aminobutyric acid (GABA) A receptor, subunit beta 3 [Source:MGI Symbol;Acc:MGI:95621]
ENSMUSG00000029060	2187.21	1719.08	1769.94	1463.33	1565.63	1354.69	2285.36	1692.55	1910.79	2012.56	1676.65	1975.31	-0.236457	0.123901	0.999941	Mib2	4	155654677	155669198	protein_coding	mindbomb E3 ubiquitin protein ligase 2 [Source:MGI Symbol;Acc:MGI:2679684]
ENSMUSG00000059482	704.305	766.198	1062.9	778.22	759.708	841.867	700.472	618.925	769.773	732.482	818.866	705.413	0.214402	0.12393	0.999941	2610301B20Rik	4	10874498	10899425	protein_coding	RIKEN cDNA 2610301B20 gene [Source:MGI Symbol;Acc:MGI:1914407]
ENSMUSG00000001288	168.399	191.549	123.674	147.019	196.427	130.43	172.177	171.818	221.188	207.89	159.583	193.268	-0.27513	0.124024	0.999941	Rarg	15	102234938	102257517	protein_coding	retinoic acid receptor, gamma [Source:MGI Symbol;Acc:MGI:97858]
ENSMUSG00000025175	524.019	326.704	548.367	396.951	429.442	364.611	507.976	463.245	579.766	512.207	431.682	515.798	-0.257703	0.124192	0.999941	Fn3k	11	121434913	121450491	protein_coding	fructosamine 3 kinase [Source:MGI Symbol;Acc:MGI:1926834]
ENSMUSG00000043531	624.068	704.941	697.71	594.937	691.344	712.425	574.28	674.932	500.84	613.94	670.904	590.998	0.18245	0.124207	0.999941	Sorcs1	19	50143299	50678646	protein_coding	sortilin-related VPS10 domain containing receptor 1 [Source:MGI Symbol;Acc:MGI:1929666]
ENSMUSG00000037085	156.512	136.126	191.345	141.138	154.06	101.775	203.19	142.391	178.315	192.852	146.826	179.187	-0.288917	0.12434	0.999941	Trmt12	15	58872674	58877127	protein_coding	tRNA methyltranferase 12 [Source:MGI Symbol;Acc:MGI:1915510]
ENSMUSG00000033906	199.107	208.079	171.511	134.277	224.35	229.241	183.941	183.21	129.595	138.888	194.427	158.908	0.29293	0.124408	0.999941	Zdhhc15	X	104536969	104671064	protein_coding	zinc finger, DHHC domain containing 15 [Source:MGI Symbol;Acc:MGI:1915336]
ENSMUSG00000029699	19.8117	23.336	16.3343	20.5826	25.9976	10.8692	34.2215	20.884	32.1551	23.0006	19.4886	27.5653	-0.491268	0.124453	0.999941	Ssc4d	5	135960211	135974531	protein_coding	scavenger receptor cysteine rich family, 4 domains [Source:MGI Symbol;Acc:MGI:1924709]
ENSMUSG00000030588	440.81	325.731	329.02	362.647	277.308	221.336	481.24	302.818	460.889	375.972	326.142	405.23	-0.312749	0.124519	0.999941	Yif1b	7	29238329	29247597	protein_coding	Yip1 interacting factor homolog B (S. cerevisiae) [Source:MGI Symbol;Acc:MGI:1924504]
ENSMUSG00000014361	710.248	773.976	523.866	550.831	659.569	567.173	597.807	623.672	401.451	484.783	630.944	526.928	0.260607	0.124547	0.999941	Mertk	2	128698956	128802894	protein_coding	c-mer proto-oncogene tyrosine kinase [Source:MGI Symbol;Acc:MGI:96965]
ENSMUSG00000005251	10.8964	14.585	11.6674	19.6025	14.4431	8.89296	19.2496	16.1376	15.5903	27.4238	13.3479	19.6004	-0.555569	0.124575	0.999941	Ripk4	16	97741933	97763787	protein_coding	receptor-interacting serine-threonine kinase 4 [Source:MGI Symbol;Acc:MGI:1919638]
ENSMUSG00000020128	658.738	643.684	625.372	838.008	895.474	968.345	499.42	729.041	650.897	687.365	771.603	641.681	0.265831	0.124575	0.999941	Vps54	11	21239281	21321136	protein_coding	VPS54 GARP complex subunit [Source:MGI Symbol;Acc:MGI:2178798]
ENSMUSG00000038201	5.9435	0	5.83369	0.980126	0	0	0	0	0	0.88464	2.12622	0.22116	2.84438	0.124622	0.999941	Kcna7	7	45405653	45409763	protein_coding	potassium voltage-gated channel, shaker-related subfamily, member 7 [Source:MGI Symbol;Acc:MGI:96664]
ENSMUSG00000020541	461.612	446.3	466.696	506.725	446.774	601.757	383.923	449.955	417.042	454.705	488.311	426.406	0.194939	0.124698	0.999941	Tom1l1	11	90643465	90688366	protein_coding	target of myb1-like 1 (chicken) [Source:MGI Symbol;Acc:MGI:1919193]
ENSMUSG00000069920	48.5386	48.6166	42.0026	62.7281	51.9953	43.4767	79.1372	56.0071	52.6174	61.9248	49.5596	62.4216	-0.327119	0.124705	0.999941	B3gnt9	8	105252638	105255153	protein_coding	UDP-GlcNAc:betaGal beta-1,3-N-acetylglucosaminyltransferase 9 [Source:MGI Symbol;Acc:MGI:2142841]
ENSMUSG00000068205	896.478	953.858	900.722	833.107	866.588	963.404	820.247	901.809	751.259	781.137	902.359	813.613	0.149417	0.124744	0.999941	Macrod2	2	140395309	142392966	protein_coding	MACRO domain containing 2 [Source:MGI Symbol;Acc:MGI:1920149]
ENSMUSG00000031148	732.041	702.996	689.543	745.876	758.746	830.01	627.751	707.208	663.564	684.711	743.202	670.808	0.147767	0.124869	0.999941	Gpkow	X	7697131	7710262	protein_coding	G patch domain and KOW motifs [Source:MGI Symbol;Acc:MGI:1859610]
ENSMUSG00000015027	146.606	129.32	208.846	180.343	108.805	133.394	139.025	110.116	124.723	114.119	151.219	121.995	0.308562	0.124888	0.999941	Galns	8	122578242	122611463	protein_coding	galactosamine (N-acetyl)-6-sulfate sulfatase [Source:MGI Symbol;Acc:MGI:1355303]
ENSMUSG00000018395	2194.14	2135.24	2459.49	1912.23	2360.97	2192.61	1857.59	2291.54	1663.29	1956.82	2209.11	1942.31	0.18546	0.125008	0.999941	Kif3a	11	53567379	53601967	protein_coding	kinesin family member 3A [Source:MGI Symbol;Acc:MGI:107689]
ENSMUSG00000024245	888.553	681.605	869.22	949.742	923.397	814.2	915.425	846.751	1133.22	1044.76	854.453	985.04	-0.20538	0.125013	0.999941	Tmem178	17	80944632	81001816	protein_coding	transmembrane protein 178 [Source:MGI Symbol;Acc:MGI:1915277]
ENSMUSG00000046679	287.269	303.368	389.691	290.117	340.858	374.493	294.091	261.999	296.216	293.701	330.966	286.502	0.20715	0.125145	0.999941	C87436	6	86438374	86473500	protein_coding	expressed sequence C87436 [Source:MGI Symbol;Acc:MGI:2141787]
ENSMUSG00000035864	19722.5	24208.1	18557	15987.8	18235.9	18506.3	18738.4	17787.5	14130.7	15677.6	19202.9	16583.5	0.211594	0.125276	0.999941	Syt1	10	108497650	109010982	protein_coding	synaptotagmin I [Source:MGI Symbol;Acc:MGI:99667]
ENSMUSG00000049086	186.23	194.466	226.347	181.323	141.543	138.335	267.356	123.405	336.167	205.237	178.041	233.041	-0.388539	0.125281	0.999941	Bmyc	2	25706739	25707721	protein_coding	brain expressed myelocytomatosis oncogene [Source:MGI Symbol;Acc:MGI:88184]
ENSMUSG00000024446	150.569	148.767	228.681	138.198	98.2133	111.656	257.731	114.862	222.162	179.582	146.014	193.584	-0.407912	0.125288	0.999941	Rpp21	17	36255645	36258069	protein_coding	ribonuclease P 21 subunit [Source:MGI Symbol;Acc:MGI:1914926]
ENSMUSG00000006389	14.8588	4.86166	7.00043	9.80126	10.5916	2.96432	9.6248	2.84782	1.94879	2.65392	8.34634	4.26883	0.994924	0.125339	0.999941	Mpl	4	118442415	118457513	protein_coding	myeloproliferative leukemia virus oncogene [Source:MGI Symbol;Acc:MGI:97076]
ENSMUSG00000046699	807.325	923.715	908.89	949.742	1104.42	1278.61	640.584	986.294	871.11	842.177	995.45	835.041	0.253259	0.125342	0.999941	Slitrk4	X	64264885	64276996	protein_coding	SLIT and NTRK-like family, member 4 [Source:MGI Symbol;Acc:MGI:2442509]
ENSMUSG00000032601	1333.33	1336.96	1102.57	1187.91	1255.59	1319.12	1086.53	1260.63	883.777	1170.38	1255.91	1100.33	0.190842	0.12548	0.999941	Prkar2a	9	108689314	108750436	protein_coding	protein kinase, cAMP dependent regulatory, type II alpha [Source:MGI Symbol;Acc:MGI:108025]
ENSMUSG00000035692	34.6704	14.585	10.5006	22.5429	17.3318	4.94053	28.8744	21.8333	23.3855	36.2702	17.4285	27.5909	-0.659979	0.125495	0.999941	Isg15	4	156199424	156200818	protein_coding	ISG15 ubiquitin-like modifier [Source:MGI Symbol;Acc:MGI:1855694]
ENSMUSG00000022096	680.531	499.779	442.194	897.796	900.288	647.21	597.807	894.214	914.958	1055.38	677.966	865.589	-0.352413	0.125576	0.999941	Hr	14	70552212	70573548	protein_coding	hairless [Source:MGI Symbol;Acc:MGI:96223]
ENSMUSG00000027485	6.93408	3.88933	21.0013	4.90063	0.962875	3.95243	4.27769	2.84782	0.974396	3.53856	6.94011	2.90962	1.23647	0.12564	0.999941	Bpifb1	2	154190818	154220369	protein_coding	BPI fold containing family B, member 1 [Source:MGI Symbol;Acc:MGI:2137431]
ENSMUSG00000057182	673.597	935.383	621.872	614.539	852.144	908.07	586.043	852.446	498.891	566.17	767.601	625.888	0.29465	0.125695	0.999941	Scn3a	2	65457118	65567627	protein_coding	sodium channel, voltage-gated, type III, alpha [Source:MGI Symbol;Acc:MGI:98249]
ENSMUSG00000028909	810.297	825.51	555.368	747.836	762.597	708.473	809.553	918.895	780.491	873.14	735.013	845.52	-0.201516	0.125708	0.999941	Ptpru	4	131768457	131838288	protein_coding	protein tyrosine phosphatase, receptor type, U [Source:MGI Symbol;Acc:MGI:1321151]
ENSMUSG00000023044	430.904	307.257	368.689	396.951	432.331	387.338	418.144	425.274	446.273	484.783	387.245	443.619	-0.196366	0.125729	0.999941	Csad	15	102176999	102204724	protein_coding	cysteine sulfinic acid decarboxylase [Source:MGI Symbol;Acc:MGI:2180098]
ENSMUSG00000000673	7.92467	1.94466	0	4.90063	4.81438	3.95243	6.41653	4.74636	13.6415	7.07712	3.92279	7.97039	-1.00521	0.125811	0.999941	Haao	17	83831356	83846790	protein_coding	3-hydroxyanthranilate 3,4-dioxygenase [Source:MGI Symbol;Acc:MGI:1349444]
ENSMUSG00000022698	1685.97	1618.93	2128.13	1967.11	1799.61	2020.68	1405.22	1672.62	1831.86	1659.58	1870.07	1642.32	0.186964	0.125828	0.999941	Naa50	16	44139830	44163366	protein_coding	N(alpha)-acetyltransferase 50, NatE catalytic subunit [Source:MGI Symbol;Acc:MGI:1919367]
ENSMUSG00000068079	8.91525	5.83399	11.6674	8.82114	8.66588	5.92864	14.9719	3.79709	19.4879	16.8082	8.30538	13.7663	-0.735424	0.125944	0.999941	Tcf15	2	152143561	152149097	protein_coding	transcription factor 15 [Source:MGI Symbol;Acc:MGI:104664]
ENSMUSG00000074170	108.964	75.8419	64.1706	124.476	102.065	87.9415	112.289	87.333	133.492	143.312	93.9098	119.107	-0.341372	0.126103	0.999941	Plekhf1	7	38216972	38228016	protein_coding	pleckstrin homology domain containing, family F (with FYVE domain) member 1 [Source:MGI Symbol;Acc:MGI:1919537]
ENSMUSG00000054404	128.776	88.4822	80.505	73.5095	92.436	118.573	59.8876	102.521	69.1821	73.4251	97.0469	76.2541	0.346931	0.126209	0.999941	Slfn5	11	82951349	82964840	protein_coding	schlafen 5 [Source:MGI Symbol;Acc:MGI:1329004]
ENSMUSG00000016477	525.009	618.403	600.871	526.328	432.331	494.053	461.99	486.977	465.761	448.513	532.832	465.81	0.193389	0.12623	0.999941	E2f3	13	29906575	29986063	protein_coding	E2F transcription factor 3 [Source:MGI Symbol;Acc:MGI:1096340]
ENSMUSG00000017204	0.990583	2.917	4.66696	2.94038	1.92575	1.97621	2.13884	0	0.974396	0	2.56948	0.77831	1.78093	0.126263	0.999941	Gsdma	11	98664351	98677708	protein_coding	gasdermin A [Source:MGI Symbol;Acc:MGI:1889509]
ENSMUSG00000092086	556.708	463.802	388.524	412.633	436.182	326.075	489.795	488.875	528.123	513.976	430.654	505.192	-0.230027	0.126375	0.999941	Gm6793	8	112013433	112015036	protein_coding	predicted gene 6793 [Source:MGI Symbol;Acc:MGI:3643578]
ENSMUSG00000056174	60.4256	90.4269	65.3374	69.589	88.5845	79.0486	108.012	81.6374	100.363	81.3869	75.5686	92.8497	-0.292088	0.126437	0.999941	Col8a2	4	126286793	126314330	protein_coding	collagen, type VIII, alpha 2 [Source:MGI Symbol;Acc:MGI:88464]
ENSMUSG00000029470	238.731	229.47	211.18	267.574	294.64	274.694	240.62	328.448	289.396	323.778	252.715	295.561	-0.226164	0.126494	0.999941	P2rx4	5	122707544	122729738	protein_coding	purinergic receptor P2X, ligand-gated ion channel 4 [Source:MGI Symbol;Acc:MGI:1338859]
ENSMUSG00000048763	0	0	0	7.84101	2.88863	5.92864	0	12.3405	11.6928	11.5003	2.77638	8.8834	-1.67222	0.126678	0.999941	Hoxb3	11	96323326	96347930	protein_coding	homeobox B3 [Source:MGI Symbol;Acc:MGI:96184]
ENSMUSG00000073792	160.475	230.443	222.847	297.958	317.749	361.647	162.552	204.094	255.292	212.314	265.186	208.563	0.346403	0.126747	0.999941	Alg6	4	99715664	99763460	protein_coding	asparagine-linked glycosylation 6 (alpha-1,3,-glucosyltransferase) [Source:MGI Symbol;Acc:MGI:2444031]
ENSMUSG00000036731	0.990583	0.972332	0	2.94038	0	0	2.13884	0.949272	4.87198	3.53856	0.817216	2.87466	-1.79527	0.126787	0.999941	Cysrt1	2	25238818	25242452	protein_coding	cysteine rich tail 1 [Source:MGI Symbol;Acc:MGI:1915109]
ENSMUSG00000073489	6.93408	5.83399	12.8341	20.5826	5.77725	6.91675	2.13884	3.79709	7.79517	7.07712	9.81314	5.20206	0.898722	0.126829	0.999941	Ifi204	1	173747293	173766943	protein_coding	interferon activated gene 204 [Source:MGI Symbol;Acc:MGI:96429]
ENSMUSG00000040297	726.098	891.628	757.214	952.683	894.511	1090.87	691.916	861.939	704.488	789.099	885.501	761.861	0.216975	0.126972	0.999941	Suco	1	161816114	161876682	protein_coding	SUN domain containing ossification factor [Source:MGI Symbol;Acc:MGI:2138346]
ENSMUSG00000029110	1329.36	1407.94	1505.09	1436.86	1298.92	1469.31	1205.24	1348.92	1281.33	1300.42	1407.92	1283.98	0.132403	0.127064	0.999941	Rnf4	5	34336289	34355629	protein_coding	ring finger protein 4 [Source:MGI Symbol;Acc:MGI:1201691]
ENSMUSG00000038080	207.032	204.19	158.676	236.21	233.979	278.646	147.58	226.876	156.878	189.313	219.789	180.162	0.286819	0.127125	0.999941	Kdm1b	13	47043499	47085279	protein_coding	lysine (K)-specific demethylase 1B [Source:MGI Symbol;Acc:MGI:2145261]
ENSMUSG00000033964	582.463	641.739	578.702	649.824	738.525	849.772	480.171	628.418	523.251	658.172	673.504	572.503	0.234035	0.12713	0.999941	Zbtb41	1	139422288	139453005	protein_coding	zinc finger and BTB domain containing 41 [Source:MGI Symbol;Acc:MGI:2444487]
ENSMUSG00000026226	13.8682	17.502	11.6674	9.80126	4.81438	12.8454	19.2496	16.1376	15.5903	19.4621	11.7498	17.6099	-0.584515	0.12719	0.999941	Spata3	1	86016816	86029958	protein_coding	spermatogenesis associated 3 [Source:MGI Symbol;Acc:MGI:1917310]
ENSMUSG00000040964	1104.5	1189.16	955.559	1165.37	1039.91	906.094	1431.96	1093.56	1176.1	1148.26	1060.1	1212.47	-0.193117	0.127208	0.999941	Arhgef10l	4	140514485	140666012	protein_coding	Rho guanine nucleotide exchange factor (GEF) 10-like [Source:MGI Symbol;Acc:MGI:1920004]
ENSMUSG00000031706	646.851	503.668	397.858	622.38	496.844	519.744	599.946	690.121	583.663	616.594	531.224	622.581	-0.228318	0.127258	0.999941	Rfx1	8	84066834	84096992	protein_coding	regulatory factor X, 1 (influences HLA class II expression) [Source:MGI Symbol;Acc:MGI:105982]
ENSMUSG00000050552	449.725	377.265	516.865	345.985	299.454	233.193	526.156	332.245	625.562	418.435	370.414	475.6	-0.361029	0.127357	0.999941	Lamtor4	5	138255482	138259398	protein_coding	late endosomal/lysosomal adaptor, MAPK and MTOR activator 4 [Source:MGI Symbol;Acc:MGI:1913346]
ENSMUSG00000033487	1196.62	1214.44	1174.91	1380.02	1372.1	1668.91	960.341	1358.41	1102.04	1165.96	1334.5	1146.69	0.218703	0.127467	0.999941	Fndc3a	14	72537946	72710003	protein_coding	fibronectin type III domain containing 3A [Source:MGI Symbol;Acc:MGI:1196463]
ENSMUSG00000030276	212.975	254.751	140.009	315.601	379.373	293.468	239.551	420.528	332.269	400.742	266.029	348.272	-0.388151	0.127472	0.999941	Ttll3	6	113389260	113414587	protein_coding	tubulin tyrosine ligase-like family, member 3 [Source:MGI Symbol;Acc:MGI:2141418]
ENSMUSG00000069020	636.945	557.146	586.87	616.499	467.957	476.268	758.22	514.505	742.49	607.748	556.948	655.741	-0.235249	0.127553	0.999941	Urm1	2	29820075	29845002	protein_coding	ubiquitin related modifier 1 [Source:MGI Symbol;Acc:MGI:1915455]
ENSMUSG00000034022	1188.7	1028.73	1010.4	1048.73	1081.31	989.095	1250.15	1217.92	1065.02	1155.34	1057.83	1172.11	-0.147652	0.127577	0.999941	Cpsf1	15	76595803	76607591	protein_coding	cleavage and polyadenylation specific factor 1 [Source:MGI Symbol;Acc:MGI:2679722]
ENSMUSG00000048310	173.352	185.715	136.508	182.303	178.132	130.43	195.704	186.057	227.034	171.62	164.407	195.104	-0.244533	0.12761	0.999941	Pskh1	8	105900441	105931778	protein_coding	protein serine kinase H1 [Source:MGI Symbol;Acc:MGI:3528383]
ENSMUSG00000017723	8.91525	6.80632	11.6674	17.6423	9.62875	2.96432	20.319	12.3405	22.4111	8.8464	9.60405	15.9793	-0.730848	0.127656	0.999941	Wfdc2	2	164562413	164568510	protein_coding	WAP four-disulfide core domain 2 [Source:MGI Symbol;Acc:MGI:1914951]
ENSMUSG00000044167	616.143	644.656	569.369	553.771	645.126	662.032	598.876	606.585	495.968	463.551	615.183	541.245	0.185834	0.127679	0.999941	Foxo1	3	52268336	52353221	protein_coding	forkhead box O1 [Source:MGI Symbol;Acc:MGI:1890077]
ENSMUSG00000040928	817.231	875.099	667.375	922.299	929.174	1067.16	683.361	904.656	703.514	712.135	879.722	750.917	0.228701	0.127824	0.999941	S100pbp	4	129148005	129189727	protein_coding	S100P binding protein [Source:MGI Symbol;Acc:MGI:1921898]
ENSMUSG00000031808	2101.03	1937.86	1809.61	2236.65	1794.8	1579.98	2308.88	1944.11	2218.7	2213.37	1909.99	2171.27	-0.184838	0.128081	0.999941	Slc27a1	8	71568882	71587302	protein_coding	solute carrier family 27 (fatty acid transporter), member 1 [Source:MGI Symbol;Acc:MGI:1347098]
ENSMUSG00000058665	13.8682	9.72332	18.6678	31.364	20.2204	39.5243	4.27769	40.8187	56.515	53.963	22.228	38.8936	-0.80996	0.128502	0.999941	En1	1	120602418	120607992	protein_coding	engrailed 1 [Source:MGI Symbol;Acc:MGI:95389]
ENSMUSG00000020389	184.249	246.972	233.348	246.992	205.092	262.836	192.496	202.195	194.879	204.352	229.915	198.481	0.211474	0.128523	0.999941	Cdkl3	11	52004221	52089784	protein_coding	cyclin-dependent kinase-like 3 [Source:MGI Symbol;Acc:MGI:2388268]
ENSMUSG00000022487	0	1.94466	4.66696	0.980126	3.8515	4.94053	0	0	1.94879	0.88464	2.73063	0.708358	1.91879	0.12855	0.999941	Gtsf1	15	103402405	103430470	protein_coding	gametocyte specific factor 1 [Source:MGI Symbol;Acc:MGI:1921424]
ENSMUSG00000047394	29.7175	49.5889	33.8354	47.0461	33.7006	48.4172	44.9157	39.8694	79.9005	50.4245	40.3843	53.7775	-0.411498	0.128561	0.999941	Odf3b	15	89377449	89379282	protein_coding	outer dense fiber of sperm tails 3B [Source:MGI Symbol;Acc:MGI:1917363]
ENSMUSG00000049285	55.4727	55.4229	58.3369	52.9268	24.0719	19.7621	99.4563	29.4274	94.5164	46.0013	44.3322	67.3504	-0.602499	0.128679	0.999941	Mblac1	5	138194314	138195621	protein_coding	metallo-beta-lactamase domain containing 1 [Source:MGI Symbol;Acc:MGI:2679717]
ENSMUSG00000069300	0.990583	0	1.16674	1.96025	3.8515	0	5.34711	2.84782	2.92319	3.53856	1.32818	3.66417	-1.45037	0.128749	0.999941	Hist1h2bj	13	22043214	22043676	protein_coding	histone cluster 1, H2bj [Source:MGI Symbol;Acc:MGI:2448388]
ENSMUSG00000020817	2838.02	2701.14	3080.19	2849.23	2979.14	2973.21	2377.33	2832.63	2720.51	2666.31	2903.49	2649.19	0.131938	0.128862	0.999941	Rabep1	11	70844778	70943105	protein_coding	rabaptin, RAB GTPase binding effector protein 1 [Source:MGI Symbol;Acc:MGI:1860236]
ENSMUSG00000028312	194.154	203.217	165.677	215.628	269.605	332.992	145.441	227.825	186.11	176.043	230.212	183.855	0.324628	0.128863	0.999941	Smc2	4	52439243	52488260	protein_coding	structural maintenance of chromosomes 2 [Source:MGI Symbol;Acc:MGI:106067]
ENSMUSG00000019998	2136.69	2167.33	2497.99	2315.06	2119.29	2361.58	1934.58	1933.67	2325.88	1965.67	2266.32	2039.95	0.151626	0.128869	0.999941	Stx7	10	24149302	24190222	protein_coding	syntaxin 7 [Source:MGI Symbol;Acc:MGI:1858210]
ENSMUSG00000040720	803.363	833.288	736.212	799.783	944.58	997.988	620.265	946.424	623.614	706.827	852.536	724.283	0.235133	0.128937	0.999941	Virma	4	11485958	11550684	protein_coding	vir like m6A methyltransferase associated [Source:MGI Symbol;Acc:MGI:1913435]
ENSMUSG00000067847	396.233	255.723	374.523	219.548	161.763	114.62	534.711	175.615	453.094	308.739	253.735	368.04	-0.536687	0.128938	0.999941	Romo1	2	156144039	156145797	protein_coding	reactive oxygen species modulator 1 [Source:MGI Symbol;Acc:MGI:1914317]
ENSMUSG00000033377	260.523	233.36	150.509	128.397	211.833	181.812	177.524	149.985	150.057	148.62	194.406	156.546	0.314374	0.129	0.999941	Palmd	3	116918258	116968987	protein_coding	palmdelphin [Source:MGI Symbol;Acc:MGI:2148896]
ENSMUSG00000022123	48.5386	35.004	44.3361	50.9666	29.8491	50.3935	31.0132	40.8187	26.3087	33.6163	43.1813	32.9392	0.387606	0.129003	0.999941	Scel	14	103513342	103612797	protein_coding	sciellin [Source:MGI Symbol;Acc:MGI:1891228]
ENSMUSG00000109305	9.90583	6.80632	7.00043	30.3839	26.9605	20.7502	7.48596	37.0216	33.1295	39.8088	16.9679	29.3615	-0.790569	0.12907	0.999941	1810010D01Rik	7	145205825	145208119	protein_coding	RIKEN cDNA 1810010D01 gene [Source:MGI Symbol;Acc:MGI:1916283]
ENSMUSG00000018651	398.215	455.051	512.198	521.427	466.032	480.22	455.574	355.977	448.222	394.549	472.19	413.581	0.191606	0.129098	0.999941	Tada2a	11	84078920	84129600	protein_coding	transcriptional adaptor 2A [Source:MGI Symbol;Acc:MGI:2144471]
ENSMUSG00000028019	146.606	147.794	189.012	126.436	103.028	108.692	132.608	100.623	115.953	92.0026	136.928	110.297	0.31177	0.129129	0.999941	Pdgfc	3	81036416	81214040	protein_coding	platelet-derived growth factor, C polypeptide [Source:MGI Symbol;Acc:MGI:1859631]
ENSMUSG00000016181	315.996	269.336	260.183	293.058	340.858	343.861	226.718	311.361	228.983	272.469	303.882	259.883	0.225316	0.129215	0.999941	Diexf	1	193091104	193130272	protein_coding	digestive organ expansion factor homolog (zebrafish) [Source:MGI Symbol;Acc:MGI:2138080]
ENSMUSG00000006310	32.6893	26.253	21.0013	17.6423	20.2204	16.7978	41.7075	29.4274	19.4879	34.501	22.434	31.2809	-0.476451	0.129236	0.999941	Zbtb32	7	30589681	30598909	protein_coding	zinc finger and BTB domain containing 32 [Source:MGI Symbol;Acc:MGI:1891838]
ENSMUSG00000038301	2341.74	2522.23	3300.7	2239.59	2031.67	2263.75	2278.94	1836.84	2203.11	2062.1	2449.95	2095.25	0.225461	0.129237	0.999941	Snx10	6	51523901	51590679	protein_coding	sorting nexin 10 [Source:MGI Symbol;Acc:MGI:1919232]
ENSMUSG00000092035	1156.01	949.968	1099.07	913.478	864.662	1201.54	695.124	1125.84	700.591	920.91	1030.79	860.616	0.259781	0.129432	0.999941	Peg10	6	4747306	4760517	protein_coding	paternally expressed 10 [Source:MGI Symbol;Acc:MGI:2157785]
ENSMUSG00000058979	512.132	468.664	437.527	634.142	550.765	548.399	525.086	570.513	663.564	672.326	525.271	607.872	-0.210638	0.129443	0.999941	Hdhd5	6	120509494	120531319	protein_coding	haloacid dehalogenase like hydrolase domain containing 5 [Source:MGI Symbol;Acc:MGI:2136976]
ENSMUSG00000023039	0	0.972332	1.16674	0.980126	0	2.96432	1.06942	3.79709	0.974396	7.07712	1.01392	3.22951	-1.69432	0.129623	0.999941	Krt7	15	101411043	101430313	protein_coding	keratin 7 [Source:MGI Symbol;Acc:MGI:96704]
ENSMUSG00000091204	1.98117	0.972332	1.16674	0.980126	9.62875	1.97621	1.06942	1.89854	0	0	2.78422	0.741992	1.93803	0.129623	0.999941	Gm7271	5	76484040	76516649	protein_coding	predicted gene 7271 [Source:MGI Symbol;Acc:MGI:3647743]
ENSMUSG00000041794	1455.17	1350.57	1302.08	843.889	966.727	829.022	1120.75	942.627	769.773	815.638	1124.58	912.198	0.302077	0.129653	0.999941	Myrip	9	120301513	120474841	protein_coding	myosin VIIA and Rab interacting protein [Source:MGI Symbol;Acc:MGI:2384407]
ENSMUSG00000040667	851.902	933.439	1005.73	1109.5	973.467	1107.67	882.273	823.019	978.294	854.562	996.951	884.537	0.172693	0.129656	0.999941	Nup88	11	70943058	70969973	protein_coding	nucleoporin 88 [Source:MGI Symbol;Acc:MGI:104900]
ENSMUSG00000069206	285.288	267.391	308.019	375.388	254.199	340.897	178.594	273.39	295.242	266.277	305.197	253.376	0.266979	0.129739	0.999941	Zfp874a	13	67424549	67451624	protein_coding	zinc finger protein 874a [Source:MGI Symbol;Acc:MGI:3040703]
ENSMUSG00000070985	0.990583	2.917	0	1.96025	1.92575	0.988107	0	0	0	0.88464	1.46361	0.22116	2.33544	0.129758	0.999941	Acnat1	4	49447105	49473912	protein_coding	acyl-coenzyme A amino acid N-acyltransferase 1 [Source:MGI Symbol;Acc:MGI:2140197]
ENSMUSG00000056184	0	1.94466	0	0	0.962875	0	5.34711	0.949272	0.974396	1.76928	0.48459	2.26001	-2.15799	0.13019	0.999941	Olfr283	15	98377699	98380946	protein_coding	olfactory receptor 283 [Source:MGI Symbol;Acc:MGI:3030117]
ENSMUSG00000024885	99.0583	90.4269	75.838	63.7082	58.7354	41.5005	110.15	66.449	106.209	92.0026	71.5446	93.7028	-0.388481	0.130231	0.999941	Aldh3b1	19	3913493	3929761	protein_coding	aldehyde dehydrogenase 3 family, member B1 [Source:MGI Symbol;Acc:MGI:1914939]
ENSMUSG00000039031	181.277	199.328	245.015	222.489	228.201	238.134	165.76	212.637	200.726	173.389	219.074	188.128	0.218187	0.130407	0.999941	Arhgap18	10	26753421	26918648	protein_coding	Rho GTPase activating protein 18 [Source:MGI Symbol;Acc:MGI:1921160]
ENSMUSG00000008932	0.990583	0	1.16674	0.980126	1.92575	0	1.06942	0	4.87198	6.19248	0.843866	3.03347	-1.86257	0.130414	0.999941	Slc1a7	4	107968332	108013532	protein_coding	solute carrier family 1 (glutamate transporter), member 7 [Source:MGI Symbol;Acc:MGI:2444087]
ENSMUSG00000020687	922.233	1068.59	947.392	1146.75	1211.3	1309.24	733.624	1178.05	841.878	963.373	1100.92	929.23	0.244413	0.130464	0.999941	Cdc27	11	104502745	104550620	protein_coding	cell division cycle 27 [Source:MGI Symbol;Acc:MGI:102685]
ENSMUSG00000022911	155.522	208.079	175.011	192.105	212.795	251.967	116.567	181.311	166.622	190.198	199.246	163.674	0.282049	0.130514	0.999941	Arl13b	16	62793685	62847040	protein_coding	ADP-ribosylation factor-like 13B [Source:MGI Symbol;Acc:MGI:1915396]
ENSMUSG00000053094	1045.07	943.162	1025.56	1034.03	897.4	926.844	957.133	854.345	888.649	845.716	978.678	886.461	0.143013	0.130528	0.999941	Tmem248	5	130217081	130243765	protein_coding	transmembrane protein 248 [Source:MGI Symbol;Acc:MGI:1918917]
ENSMUSG00000026308	7.92467	2.917	9.33391	1.96025	6.74013	1.97621	0	2.84782	3.89758	1.76928	5.14203	2.12867	1.24596	0.130579	0.999941	Klhl30	1	91351016	91362416	protein_coding	kelch-like 30 [Source:MGI Symbol;Acc:MGI:1918038]
ENSMUSG00000035486	513.122	369.486	225.181	651.784	539.21	501.958	398.895	631.266	789.261	649.326	466.79	617.187	-0.402612	0.130697	0.999941	Plk5	10	80356459	80365489	protein_coding	polo like kinase 5 [Source:MGI Symbol;Acc:MGI:3026984]
ENSMUSG00000073077	33.6798	39.8656	16.3343	21.5628	25.0348	39.5243	11.7636	22.7825	23.3855	23.8853	29.3336	20.4542	0.517867	0.130702	0.999941	Gm7173	X	79266559	79517285	protein_coding	predicted gene 7173 [Source:MGI Symbol;Acc:MGI:3645063]
ENSMUSG00000052276	0	0	0	0	1.92575	0.988107	1.06942	1.89854	1.94879	3.53856	0.485643	2.11383	-2.08606	0.130708	0.999941	Ostn	16	27307489	27351212	protein_coding	osteocrin [Source:MGI Symbol;Acc:MGI:2677164]
ENSMUSG00000037143	59.435	50.5613	84.0052	18.6224	46.218	50.3935	49.1934	33.2245	33.1295	28.3085	51.5392	35.964	0.518915	0.130714	0.999941	Cfap61	2	145934784	146215039	protein_coding	cilia and flagella associated protein 61 [Source:MGI Symbol;Acc:MGI:1926024]
ENSMUSG00000031112	163.446	208.079	197.179	160.741	161.763	201.574	172.177	165.173	144.211	142.427	182.13	155.997	0.224079	0.13076	0.999941	Stk26	X	50841047	50893097	protein_coding	serine/threonine kinase 26 [Source:MGI Symbol;Acc:MGI:1917665]
ENSMUSG00000030204	785.533	847.873	952.059	948.762	883.919	811.236	764.637	713.853	834.083	812.984	871.564	781.389	0.157093	0.130912	0.999941	Ddx47	6	135011612	135023776	protein_coding	DEAD (Asp-Glu-Ala-Asp) box polypeptide 47 [Source:MGI Symbol;Acc:MGI:1915005]
ENSMUSG00000058799	3829.6	4081.85	4917.8	4050.86	3969.93	4172.78	4017.82	3315.81	4036.92	3494.33	4170.47	3716.22	0.166345	0.131262	0.999941	Nap1l1	10	111473223	111498150	protein_coding	nucleosome assembly protein 1-like 1 [Source:MGI Symbol;Acc:MGI:1855693]
ENSMUSG00000019857	101.04	119.597	159.843	151.92	132.877	209.479	85.5538	131	142.262	99.0797	145.792	114.474	0.347558	0.131471	0.999941	Asf1a	10	53596757	53609225	protein_coding	anti-silencing function 1A histone chaperone [Source:MGI Symbol;Acc:MGI:1913653]
ENSMUSG00000091735	362.554	259.613	304.519	222.489	165.615	142.287	412.797	224.977	368.322	278.662	242.846	321.189	-0.40339	0.131564	0.999941	Gpr62	9	106463962	106465938	protein_coding	G protein-coupled receptor 62 [Source:MGI Symbol;Acc:MGI:3525078]
ENSMUSG00000029686	2117.87	2352.07	2480.49	2534.61	2448.59	2628.36	2188.04	2319.07	2147.57	2179.75	2427	2208.61	0.135982	0.131626	0.999941	Cul1	6	47453398	47526139	protein_coding	cullin 1 [Source:MGI Symbol;Acc:MGI:1349658]
ENSMUSG00000043259	830.109	886.767	837.719	580.235	714.453	770.723	582.835	776.505	563.201	699.75	770.001	655.573	0.231478	0.131726	0.999941	Fam13c	10	70440481	70558736	protein_coding	family with sequence similarity 13, member C [Source:MGI Symbol;Acc:MGI:1918971]
ENSMUSG00000021392	420.998	472.553	502.864	426.355	472.772	475.279	373.228	434.767	418.99	424.627	461.804	412.903	0.160012	0.131768	0.999941	Nol8	13	49653078	49679016	protein_coding	nucleolar protein 8 [Source:MGI Symbol;Acc:MGI:1918180]
ENSMUSG00000047714	3193.64	3165.91	3836.24	3490.23	2994.54	3439.6	3140.89	2656.06	3403.57	2659.23	3353.36	2964.94	0.17761	0.13183	0.999941	Ppp1r2	16	31251537	31275277	protein_coding	protein phosphatase 1, regulatory inhibitor subunit 2 [Source:MGI Symbol;Acc:MGI:1914099]
ENSMUSG00000047414	968.791	1106.51	884.388	904.656	940.729	1051.35	943.23	932.185	760.029	830.677	976.071	866.53	0.172298	0.131959	0.999941	Flrt2	12	95692226	95785215	protein_coding	fibronectin leucine rich transmembrane protein 2 [Source:MGI Symbol;Acc:MGI:3603594]
ENSMUSG00000022556	678.55	548.395	520.366	590.036	596.02	615.591	546.475	764.164	683.052	714.789	591.493	677.12	-0.195368	0.132049	0.999941	Hsf1	15	76477422	76501913	protein_coding	heat shock factor 1 [Source:MGI Symbol;Acc:MGI:96238]
ENSMUSG00000051146	2793.45	2387.07	2041.79	2157.26	1478.01	1497.97	3085.28	1759.95	2887.14	2570.76	2059.26	2575.78	-0.322823	0.132053	0.999941	Camk2n2	16	20619215	20621287	protein_coding	calcium/calmodulin-dependent protein kinase II inhibitor 2 [Source:MGI Symbol;Acc:MGI:1920297]
ENSMUSG00000015337	211.985	174.047	267.183	111.734	126.137	120.549	301.577	157.579	203.649	231.776	168.606	223.645	-0.40872	0.13206	0.999941	Endog	2	30171493	30174069	protein_coding	endonuclease G [Source:MGI Symbol;Acc:MGI:1261433]
ENSMUSG00000055022	7252.06	8297.88	7838.15	7370.55	8145.92	8573.8	6576.95	7669.17	7168.63	7381.44	7913.06	7199.05	0.136375	0.132107	0.999941	Cntn1	15	92051165	92341967	protein_coding	contactin 1 [Source:MGI Symbol;Acc:MGI:105980]
ENSMUSG00000033352	3279.82	3492.62	3383.54	3369.67	3405.69	3966.26	2854.29	3521.8	2845.24	3268.75	3482.93	3122.52	0.157475	0.132168	0.999941	Map2k4	11	65688243	65788297	protein_coding	mitogen-activated protein kinase kinase 4 [Source:MGI Symbol;Acc:MGI:1346869]
ENSMUSG00000032278	89.1525	65.1462	51.3365	48.0262	55.8468	66.2032	52.4017	53.1592	45.7966	46.8859	62.6186	49.5609	0.340154	0.132173	0.999941	Paqr5	9	61953481	62026856	protein_coding	progestin and adipoQ receptor family member V [Source:MGI Symbol;Acc:MGI:1921340]
ENSMUSG00000023707	507.179	386.988	410.692	363.627	247.459	249.003	571.071	295.224	532.02	456.474	360.825	463.697	-0.361827	0.132258	0.999941	Ogfod2	5	124112297	124115483	protein_coding	2-oxoglutarate and iron-dependent oxygenase domain containing 2 [Source:MGI Symbol;Acc:MGI:1913877]
ENSMUSG00000024697	13.8682	7.77866	9.33391	10.7814	28.8863	10.8692	10.6942	6.6449	6.82077	8.8464	13.5863	8.25158	0.728586	0.132258	0.999941	Gna14	19	16435667	16610818	protein_coding	guanine nucleotide binding protein, alpha 14 [Source:MGI Symbol;Acc:MGI:95769]
ENSMUSG00000024955	1264.97	873.154	777.048	797.823	709.639	592.864	1012.74	788.845	1186.81	1159.76	835.917	1037.04	-0.311045	0.132319	0.999941	Esrra	19	6910977	6921813	protein_coding	estrogen related receptor, alpha [Source:MGI Symbol;Acc:MGI:1346831]
ENSMUSG00000022858	1091.62	1226.11	1283.41	1315.33	1126.56	1281.57	1023.44	903.707	1236.51	1145.61	1220.77	1077.32	0.180099	0.132422	0.999941	Tra2b	16	22244549	22266005	protein_coding	transformer 2 beta [Source:MGI Symbol;Acc:MGI:106016]
ENSMUSG00000020395	11.887	17.502	18.6678	13.7218	7.703	2.96432	6.41653	4.74636	7.79517	8.8464	12.0743	6.95112	0.786165	0.132519	0.999941	Itk	11	46325150	46389515	protein_coding	IL2 inducible T cell kinase [Source:MGI Symbol;Acc:MGI:96621]
ENSMUSG00000043881	920.252	908.158	1052.4	893.875	927.249	979.214	727.207	919.845	932.497	793.522	946.858	843.268	0.166474	0.132573	0.999941	Kbtbd7	14	79426511	79431036	protein_coding	kelch repeat and BTB (POZ) domain containing 7 [Source:MGI Symbol;Acc:MGI:2685141]
ENSMUSG00000027938	2.97175	10.6957	4.66696	5.88076	0.962875	3.95243	11.7636	5.69563	10.7184	7.96176	4.85507	9.03485	-0.889877	0.132794	0.999941	Creb3l4	3	90237500	90243512	protein_coding	cAMP responsive element binding protein 3-like 4 [Source:MGI Symbol;Acc:MGI:1916603]
ENSMUSG00000028850	93.1148	108.901	113.174	90.1716	60.6611	49.4053	120.845	91.1301	107.184	122.965	85.9046	110.531	-0.365839	0.132836	0.999941	Gpatch3	4	133574745	133584243	protein_coding	G patch domain containing 3 [Source:MGI Symbol;Acc:MGI:2442492]
ENSMUSG00000005950	19.8117	22.3636	33.8354	41.1653	39.4779	49.4053	35.2909	46.5143	57.4894	46.8859	34.3432	46.5451	-0.440242	0.132899	0.999941	P2rx5	11	73160421	73172685	protein_coding	purinergic receptor P2X, ligand-gated ion channel, 5 [Source:MGI Symbol;Acc:MGI:2137026]
ENSMUSG00000009378	85.1902	94.3162	43.1693	45.0858	72.2156	78.0604	55.61	50.3114	52.6174	55.7323	69.6729	53.5678	0.382639	0.132934	0.999941	Slc16a12	19	34668403	34747289	protein_coding	solute carrier family 16 (monocarboxylic acid transporters), member 12 [Source:MGI Symbol;Acc:MGI:2147716]
ENSMUSG00000024331	19.8117	23.336	18.6678	23.523	21.1833	30.6313	10.6942	18.9854	12.6672	22.116	22.8588	16.1157	0.495322	0.133065	0.999941	Dsc2	18	20030633	20059554	protein_coding	desmocollin 2 [Source:MGI Symbol;Acc:MGI:103221]
ENSMUSG00000027993	5421.46	6179.17	7017.93	6272.81	6578.36	6583.76	4642.36	6775.9	5281.23	5506	6342.25	5551.37	0.192043	0.133124	0.999941	Trim2	3	84160439	84306877	protein_coding	tripartite motif-containing 2 [Source:MGI Symbol;Acc:MGI:1933163]
ENSMUSG00000024789	899.45	916.909	864.554	943.861	1140.04	1287.5	690.847	1075.53	776.594	849.254	1008.72	848.055	0.250174	0.133206	0.999941	Jak2	19	29251828	29313080	protein_coding	Janus kinase 2 [Source:MGI Symbol;Acc:MGI:96629]
ENSMUSG00000029403	741.947	814.814	925.224	680.208	855.033	816.176	590.321	743.28	756.131	734.251	805.567	705.996	0.18936	0.133235	0.999941	Cdkl2	5	92006074	92043883	protein_coding	cyclin-dependent kinase-like 2 (CDC2-related kinase) [Source:MGI Symbol;Acc:MGI:1858227]
ENSMUSG00000091556	11.887	15.5573	8.16717	16.6621	26.9605	28.6551	3.20827	17.0869	8.76957	14.1542	17.9815	10.8047	0.727949	0.133483	0.999941	Gm14569	X	36423601	36491830	protein_coding	predicted gene 14569 [Source:MGI Symbol;Acc:MGI:3705243]
ENSMUSG00000079531	3.96233	0.972332	1.16674	1.96025	0	0.988107	0	0.949272	0	0	1.50829	0.237318	2.36283	0.133492	0.999941	Gm5936	X	74837196	74843355	protein_coding	predicted gene 5936 [Source:MGI Symbol;Acc:MGI:3645575]
ENSMUSG00000023882	16.8399	24.3083	30.3352	20.5826	37.5521	50.3935	18.1802	19.9347	27.2831	17.6928	30.0019	20.7727	0.530743	0.133629	0.999941	Zfp54	17	21423227	21435640	protein_coding	zinc finger protein 54 [Source:MGI Symbol;Acc:MGI:99201]
ENSMUSG00000029134	19.8117	21.3913	37.3356	23.523	3.8515	15.8097	17.1108	7.59418	15.5903	7.96176	20.2871	12.0643	0.750464	0.133674	0.999941	Plb1	5	32232708	32366520	protein_coding	phospholipase B1 [Source:MGI Symbol;Acc:MGI:1922406]
ENSMUSG00000070336	3.96233	9.72332	2.33348	10.7814	8.66588	6.91675	11.7636	15.1884	7.79517	12.385	7.06386	11.783	-0.725424	0.133711	0.999941	Fbxo47	11	97853826	97884154	protein_coding	F-box protein 47 [Source:MGI Symbol;Acc:MGI:1920223]
ENSMUSG00000033813	1022.28	1032.62	1100.23	1272.2	1179.52	1287.5	859.815	932.185	1150.76	1081.91	1149.06	1006.17	0.191312	0.133713	0.999941	Tcea1	1	4857814	4897909	protein_coding	transcription elongation factor A (SII) 1 [Source:MGI Symbol;Acc:MGI:1196624]
ENSMUSG00000035329	1127.28	1195	1355.75	1126.16	1249.81	1300.35	1068.35	1086.92	1129.33	1158.88	1225.73	1110.87	0.141362	0.133755	0.999941	Fbxo33	12	59200655	59219725	protein_coding	F-box protein 33 [Source:MGI Symbol;Acc:MGI:1917861]
ENSMUSG00000020167	461.612	547.423	330.187	479.282	467.957	339.909	614.918	485.078	486.224	503.36	437.728	522.395	-0.253827	0.133822	0.999941	Tcf3	10	80409514	80433647	protein_coding	transcription factor 3 [Source:MGI Symbol;Acc:MGI:98510]
ENSMUSG00000037275	506.188	449.217	455.028	416.554	429.442	424.886	378.575	481.281	326.423	368.01	446.886	388.572	0.201433	0.133833	0.999941	Gemin5	11	58120002	58168539	protein_coding	gem nuclear organelle associated protein 5 [Source:MGI Symbol;Acc:MGI:2449311]
ENSMUSG00000025159	676.568	738.972	792.216	844.869	795.335	832.974	706.888	728.092	718.13	653.749	780.156	701.715	0.153077	0.133835	0.999941	Mms19	19	41941086	41981157	protein_coding	MMS19 (MET18 S. cerevisiae) [Source:MGI Symbol;Acc:MGI:1919449]
ENSMUSG00000020810	1189.69	1105.54	999.895	1118.32	915.694	861.629	1248.02	981.547	1353.44	1177.46	1031.8	1190.11	-0.205759	0.133874	0.999941	Cygb	11	116645595	116654313	protein_coding	cytoglobin [Source:MGI Symbol;Acc:MGI:2149481]
ENSMUSG00000023903	1.98117	7.77866	8.16717	4.90063	16.3689	1.97621	4.27769	0.949272	3.89758	3.53856	6.86212	3.16578	1.1226	0.133892	0.999941	Mmp25	17	23628311	23645277	protein_coding	matrix metallopeptidase 25 [Source:MGI Symbol;Acc:MGI:2443938]
ENSMUSG00000032290	755.815	747.723	637.039	612.579	697.122	739.104	558.238	677.78	589.51	655.518	698.23	620.262	0.170527	0.134034	0.999941	Ptpn9	9	56994923	57062807	protein_coding	protein tyrosine phosphatase, non-receptor type 9 [Source:MGI Symbol;Acc:MGI:1928376]
ENSMUSG00000038354	220.9	201.273	247.349	158.78	156.949	151.18	275.911	193.652	251.394	201.698	189.405	230.664	-0.284796	0.134109	0.999941	Ankrd35	3	96670131	96691032	protein_coding	ankyrin repeat domain 35 [Source:MGI Symbol;Acc:MGI:2442590]
ENSMUSG00000022229	0	0	0	0.980126	0.962875	1.97621	1.06942	2.84782	1.94879	3.53856	0.653202	2.35115	-1.83472	0.134199	0.999941	Atp12a	14	56365068	56388550	protein_coding	ATPase, H+/K+ transporting, nongastric, alpha polypeptide [Source:MGI Symbol;Acc:MGI:1926943]
ENSMUSG00000096596	22.7834	37.9209	10.5006	31.364	2.88863	34.5837	26.7356	10.442	8.76957	3.53856	23.3402	12.3714	0.929335	0.134299	0.999941	Gm10591	4	42612195	42612860	protein_coding	predicted gene 10591 [Source:MGI Symbol;Acc:MGI:3711256]
ENSMUSG00000024811	3089.63	3029.79	2911.01	2973.7	3466.35	3566.08	2432.94	3269.29	2565.59	2937.89	3172.76	2801.43	0.179486	0.134359	0.999941	Tnks2	19	36834232	36893477	protein_coding	tankyrase, TRF1-interacting ankyrin-related ADP-ribose polymerase 2 [Source:MGI Symbol;Acc:MGI:1921743]
ENSMUSG00000000486	28.7269	29.17	23.3348	32.3442	23.109	29.6432	34.2215	30.3767	35.0783	44.232	27.7213	35.9771	-0.376544	0.134372	0.999941	Septin1	7	127214447	127233130	protein_coding	septin 1 [Source:MGI Symbol;Acc:MGI:1858916]
ENSMUSG00000047632	77.2655	114.735	112.007	111.734	88.5845	79.0486	155.066	104.42	124.723	96.4258	97.2292	120.159	-0.303568	0.134378	0.999941	Fgfbp3	19	36917550	36919615	protein_coding	fibroblast growth factor binding protein 3 [Source:MGI Symbol;Acc:MGI:1919764]
ENSMUSG00000060224	28.7269	31.1146	25.6683	45.0858	46.218	31.6194	29.9438	43.6665	66.2589	46.8859	34.7388	46.6888	-0.425438	0.134475	0.999941	Pyroxd2	19	42725858	42752775	protein_coding	pyridine nucleotide-disulphide oxidoreductase domain 2 [Source:MGI Symbol;Acc:MGI:1921830]
ENSMUSG00000025350	77.2655	64.1739	80.505	91.1517	113.619	83.9891	96.248	85.4345	120.825	115.888	85.1174	104.599	-0.297432	0.134501	0.999941	Rdh5	10	128913593	128922888	protein_coding	retinol dehydrogenase 5 [Source:MGI Symbol;Acc:MGI:1201412]
ENSMUSG00000009585	64.3879	59.3123	70.0043	53.9069	51.0324	68.1794	50.2628	52.21	42.8734	53.0784	61.1372	49.6062	0.297763	0.134548	0.999941	Apobec3	15	79891659	79915906	protein_coding	apolipoprotein B mRNA editing enzyme, catalytic polypeptide 3 [Source:MGI Symbol;Acc:MGI:1933111]
ENSMUSG00000034825	2576.51	2564.04	2606.49	2623.8	2588.21	2733.1	2307.81	2523.17	2378.5	2511.49	2615.36	2430.24	0.105685	0.134666	0.999941	Nrip3	7	109758055	109782025	protein_coding	nuclear receptor interacting protein 3 [Source:MGI Symbol;Acc:MGI:1925843]
ENSMUSG00000038332	1154.03	1133.74	1431.59	1417.26	1230.55	1330.98	1100.44	1109.7	1219.94	1157.99	1283.03	1147.02	0.161258	0.134709	0.999941	Sesn1	10	41809935	41908424	protein_coding	sestrin 1 [Source:MGI Symbol;Acc:MGI:2155278]
ENSMUSG00000034158	2020.79	2020.51	1913.45	2264.09	2052.85	2293.4	1908.92	1905.19	1960.49	1877.21	2094.18	1912.95	0.130816	0.134725	0.999941	Lrrc58	16	37868389	37888858	protein_coding	leucine rich repeat containing 58 [Source:MGI Symbol;Acc:MGI:2443542]
ENSMUSG00000031284	2469.52	2497.92	2377.81	2276.83	2488.07	2684.69	1905.71	2646.57	1986.79	2201.87	2465.81	2185.24	0.174119	0.13481	0.999941	Pak3	X	143518591	143797796	protein_coding	p21 (RAC1) activated kinase 3 [Source:MGI Symbol;Acc:MGI:1339656]
ENSMUSG00000068882	1338.28	1616.99	1810.78	1756.39	1734.14	1773.65	1331.43	1342.27	1689.6	1511.85	1671.7	1468.79	0.186456	0.134927	0.999941	Ssb	2	69861562	69871846	protein_coding	Sjogren syndrome antigen B [Source:MGI Symbol;Acc:MGI:98423]
ENSMUSG00000028175	1.98117	0.972332	1.16674	0.980126	3.8515	0	0	0	0.974396	0	1.49198	0.243599	2.35206	0.134992	0.999941	Depdc1a	3	159495433	159529955	protein_coding	DEP domain containing 1a [Source:MGI Symbol;Acc:MGI:1923381]
ENSMUSG00000095779	4.95292	12.6403	0	6.86088	13.4803	0	6.41653	28.4782	10.7184	11.5003	6.32239	14.2783	-1.1666	0.135032	0.999941	Gm2163	4	42466752	42589938	protein_coding	predicted gene 2163 [Source:MGI Symbol;Acc:MGI:3780332]
ENSMUSG00000045532	177.314	182.798	166.844	109.774	101.102	103.751	219.232	134.797	178.315	179.582	140.264	177.981	-0.34372	0.135319	0.999941	C1ql1	11	102939264	102946688	protein_coding	complement component 1, q subcomponent-like 1 [Source:MGI Symbol;Acc:MGI:1344400]
ENSMUSG00000026888	327.883	342.261	415.359	323.442	327.378	357.695	413.866	375.912	395.605	384.818	349.003	392.55	-0.170745	0.135623	0.999941	Grb14	2	64912476	65024987	protein_coding	growth factor receptor bound protein 14 [Source:MGI Symbol;Acc:MGI:1355324]
ENSMUSG00000035875	11.887	11.668	3.50022	12.7416	16.3689	14.8216	11.7636	6.6449	2.92319	7.07712	11.8312	7.10221	0.756131	0.135772	0.999941	AI182371	2	35081861	35101543	protein_coding	expressed sequence AI182371 [Source:MGI Symbol;Acc:MGI:2138853]
ENSMUSG00000033434	212.975	181.826	177.344	182.303	152.134	130.43	273.772	144.289	197.802	237.084	172.836	213.237	-0.302364	0.135823	0.999941	Gtpbp6	5	110103975	110108197	protein_coding	GTP binding protein 6 (putative) [Source:MGI Symbol;Acc:MGI:1306825]
ENSMUSG00000044229	217.928	228.498	260.183	240.131	283.085	272.718	223.509	216.434	224.111	215.852	250.424	219.977	0.187086	0.135907	0.999941	Nxpe4	9	48162023	48400025	protein_coding	neurexophilin and PC-esterase domain family, member 4 [Source:MGI Symbol;Acc:MGI:1924792]
ENSMUSG00000017176	644.87	502.696	630.039	537.109	518.027	502.946	640.584	575.259	671.359	629.864	555.948	629.266	-0.179295	0.135968	0.999941	Nt5c3b	11	100422321	100441808	protein_coding	5'-nucleotidase, cytosolic IIIB [Source:MGI Symbol;Acc:MGI:1915356]
ENSMUSG00000055341	7.92467	3.88933	3.50022	5.88076	10.5916	9.88107	10.6942	13.2898	12.6672	8.8464	6.94461	11.3744	-0.699932	0.136012	0.999941	Zfp457	13	67288138	67306485	protein_coding	zinc finger protein 457 [Source:MGI Symbol;Acc:MGI:2664334]
ENSMUSG00000031673	940.064	1146.38	989.395	913.478	943.618	922.892	805.275	992.939	851.622	825.369	975.971	868.801	0.167626	0.136016	0.999941	Cdh11	8	102632095	102785642	protein_coding	cadherin 11 [Source:MGI Symbol;Acc:MGI:99217]
ENSMUSG00000063281	305.1	377.265	491.197	385.19	339.895	339.909	325.104	306.615	304.012	342.356	373.092	319.522	0.221999	0.136034	0.999941	Zfp35	18	23989632	24005376	protein_coding	zinc finger protein 35 [Source:MGI Symbol;Acc:MGI:99179]
ENSMUSG00000021113	898.459	1017.06	977.727	1071.28	1052.42	1064.19	853.399	1007.18	855.52	937.718	1013.52	913.454	0.149761	0.136034	0.999941	Snapc1	12	73964481	73988966	protein_coding	small nuclear RNA activating complex, polypeptide 1 [Source:MGI Symbol;Acc:MGI:1922877]
ENSMUSG00000039199	842.986	794.395	784.049	746.856	854.07	674.877	858.746	875.229	897.419	841.293	782.872	868.172	-0.149101	0.136217	0.999941	Zdhhc1	8	105472423	105496902	protein_coding	zinc finger, DHHC domain containing 1 [Source:MGI Symbol;Acc:MGI:1918046]
[truncated: 16,806 more rows]

## Sheet: 482 DEGs
Gene_ID	F1918	F1624	F1622	F3908	F3612	F3609	P1623	P3904	P3612	P3907	FTY720	Placebo	Log2FoldChange	P-value	P-adj	Gene_Name	Gene_Chr	Gene_Start	Gene_End	Gene_Biotype	Gene_Description
[truncated: 482 more rows]

[truncated: 2 more sheets: GO, KEGG]
